# Supplementary material for: Diversity, taxonomic composition, and functional aspects of fungal communities in living, senesced, and fallen leaves at five sites across North America
Source: PeerJ. 2016 Dec 13;4:e2768. doi: 10.7717/peerj.2768 (PMC5157190; doi:10.7717/peerj.2768)
Supplement: Table S2 — Genotypic, geographic, host, substrate, and taxonomic information for isolates collected in surveys of five sites in North America. [file peerj-04-2768-s007.xlsx]

## Sheet: Sheet1
Supplemental Table 2. Genotypic, geographic, host, substrate, and taxonomic information for isolates collected in surveys of five sites in North America.
ITS-partial LSU rDNA accession numbers	Isolate Name	Gilbertson Mycological Herbarium accession numbers	OTU (95% ITS-partial LSU rDNA)	Genotype (100% ITS-partial LSU rDNA)	Site	Micro-site	Host species	Host lineage	Host family	Tissue type	Fungal class (order)	Kingdom	PP	Phylum	PP	Class	PP	Order	PP	Family	PP	Genus	PP	Species	UNITE Sequence Hypothesis	PP
JQ758550	AK0047	ARIZ:AK0047	15	18	AKE	C1	Salix pulchra	Angiospermae	Salicaceae	Endophyte	Dothideomycetes (Dothideales)	Fungi	1	Ascomycota	1	Dothideomycetes	0.99	Dothideales	0.99	Dothioraceae	0.99	Kabatiella	0.87	Kabatiella bupleuri	SH229248.06FU	0.87
JQ758551	AK0049	ARIZ:AK0049	16	19	AKE	C1	Betula nana	Angiospermae	Betulaceae	Endophyte	N/A	Fungi	1	Ascomycota	1	Eurotiomycetes	1	Eurotiales	1	Trichocomaceae	1	Penicillium	0.99	Penicillium sp	SH201041.06FU	0.89
JQ758594	AK0098	ARIZ:AK0098	20	29	AKE	C1	Picea glauca	Pinophyta	Pinaceae	Endophyte	N/A	Fungi	1	Fungi unidentified	0.59	NA	NA	NA	NA	NA	NA	NA	NA	NA	NA	NA
JQ758646	AK0157	ARIZ:AK0157	25	40	AKE	C2	Betula nana	Angiospermae	Betulaceae	Endophyte	Eurotiomycetes (Eurotiales)	Fungi	1	Ascomycota	1	Eurotiomycetes	1	Eurotiales	1	Trichocomaceae	1	Aspergillus	0.9	Aspergillus monodii	SH227456.06FU	1
JQ758679	AK0195	ARIZ:AK0195	32	50	AKE	C2	Picea glauca	Pinophyta	Pinaceae	Endophyte	Pezizomycetes (Pezizales)	Fungi	1	Ascomycota	1	Pezizomycetes	1	Pezizales	1	NA	NA	NA	NA	NA	SH234385.06FU	1
JQ758680	AK0196	ARIZ:AK0196	33	51	AKE	C2	Picea glauca	Pinophyta	Pinaceae	Endophyte	Eurotiomycetes (Eurotiales)	Fungi	1	Ascomycota	1	Eurotiomycetes	1	Eurotiales	1	Trichocomaceae	1	Aspergillus	1	Aspergillus ochraceus	SH231999.06FU	1
JQ758681	AK0197	ARIZ:AK0197	10	11	AKE	C2	Picea glauca	Pinophyta	Pinaceae	Endophyte	Sordariomycetes (Xylariales)	Fungi	1	Ascomycota	1	Sordariomycetes	1	Xylariales	1	Xylariaceae	1	NA	NA	NA	SH224035.06FU	1
JQ758721	AK0247	ARIZ:AK0247	36	58	AKE	C3	Salix pulchra	Angiospermae	Salicaceae	Endophyte	Leotiomycetes (Helotiales)	Fungi	1	Ascomycota	0.97	Leotiomycetes	0.95	Helotiales	0.89	NA	NA	NA	NA	NA	NA	NA
JQ758763	AK0293	ARIZ:AK0293	41	67	AKE	C3	Picea glauca	Pinophyta	Pinaceae	Endophyte	Dothideomycetes (Dothideales)	Fungi	1	Ascomycota	1	Dothideomycetes	1	Dothideales	0.96	Dothioraceae	0.96	NA	NA	NA	SH231446.06FU	0.96
JQ758764	AK0295	ARIZ:AK0295	42	68	AKE	C3	Picea glauca	Pinophyta	Pinaceae	Endophyte	Leotiomycetes (Helotiales)	Fungi	1	Ascomycota	1	Leotiomycetes	1	Helotiales	1	Incertae sedis 2	1	Darkera	1	Darkera sp	SH222480.06FU	1
JQ759481	AK1134	ARIZ:AK1134	46	119	AKN	C1	Picea glauca	Pinophyta	Pinaceae	Endophyte	N/A	Fungi	1	Ascomycota	1	NA	NA	NA	NA	NA	NA	NA	NA	NA	SH195163.06FU	0.99
JQ759482	AK1135	ARIZ:AK1135	47	120	AKN	C1	Picea glauca	Pinophyta	Pinaceae	Endophyte	Leotiomycetes (Helotiales)	Fungi	1	Ascomycota	1	Leotiomycetes	1	Helotiales	1	Incertae sedis 2	1	Darkera	1	Darkera sp	SH222480.06FU	1
JQ759483	AK1136	ARIZ:AK1136	47	120	AKN	C1	Picea glauca	Pinophyta	Pinaceae	Endophyte	Leotiomycetes (Helotiales)	Fungi	1	Ascomycota	1	Leotiomycetes	1	Helotiales	1	Incertae sedis 2	1	Darkera	1	Darkera sp	SH222480.06FU	1
JQ759484	AK1137	ARIZ:AK1137	48	121	AKN	C1	Picea glauca	Pinophyta	Pinaceae	Endophyte	Sordariomycetes (N/A)	Fungi	1	Ascomycota	1	Sordariomycetes	1	Diaporthales	1	Valsaceae	1	NA	NA	NA	SH211793.06FU	0.89
JQ759485	AK1138	ARIZ:AK1138	47	120	AKN	C1	Picea glauca	Pinophyta	Pinaceae	Endophyte	Leotiomycetes (Helotiales)	Fungi	1	Ascomycota	1	Leotiomycetes	1	Helotiales	1	Incertae sedis 2	1	Darkera	1	Darkera sp	SH222480.06FU	1
JQ759486	AK1139	ARIZ:AK1139	47	120	AKN	C1	Picea glauca	Pinophyta	Pinaceae	Endophyte	Leotiomycetes (Helotiales)	Fungi	1	Ascomycota	1	Leotiomycetes	1	Helotiales	1	Incertae sedis 2	1	Darkera	1	Darkera sp	SH222480.06FU	1
JQ759487	AK1140	ARIZ:AK1140	42	122	AKN	C1	Picea glauca	Pinophyta	Pinaceae	Endophyte	Leotiomycetes (Helotiales)	Fungi	1	Ascomycota	1	Leotiomycetes	1	Helotiales	1	Incertae sedis 2	1	Darkera	1	Darkera sp	SH222480.06FU	1
JQ759488	AK1141	ARIZ:AK1141	49	123	AKN	C1	Picea glauca	Pinophyta	Pinaceae	Endophyte	Leotiomycetes (Rhytismatales)	Fungi	1	Ascomycota	1	Leotiomycetes	1	Rhytismatales	1	Rhytismataceae	1	NA	NA	NA	SH196477.06FU	1
JQ759489	AK1142	ARIZ:AK1142	47	120	AKN	C1	Picea glauca	Pinophyta	Pinaceae	Endophyte	Leotiomycetes (Helotiales)	Fungi	1	Ascomycota	1	Leotiomycetes	1	Helotiales	1	Incertae sedis 2	1	Darkera	1	Darkera sp	SH222480.06FU	1
JQ759490	AK1143	ARIZ:AK1143	50	124	AKN	C1	Picea glauca	Pinophyta	Pinaceae	Endophyte	Leotiomycetes (Rhytismatales)	Fungi	1	Ascomycota	1	Leotiomycetes	1	Rhytismatales	1	Rhytismataceae	1	NA	NA	NA	SH196477.06FU	1
JQ759491	AK1144	ARIZ:AK1144	47	120	AKN	C1	Picea glauca	Pinophyta	Pinaceae	Endophyte	Leotiomycetes (Helotiales)	Fungi	1	Ascomycota	1	Leotiomycetes	1	Helotiales	1	Incertae sedis 2	1	Darkera	1	Darkera sp	SH222480.06FU	1
JQ759492	AK1145	ARIZ:AK1145	47	120	AKN	C1	Picea glauca	Pinophyta	Pinaceae	Endophyte	Leotiomycetes (Helotiales)	Fungi	1	Ascomycota	1	Leotiomycetes	1	Helotiales	1	Incertae sedis 2	1	Darkera	1	Darkera sp	SH222480.06FU	1
JQ759493	AK1146	ARIZ:AK1146	51	125	AKN	C1	Picea glauca	Pinophyta	Pinaceae	Endophyte	Leotiomycetes (Rhytismatales)	Fungi	1	Ascomycota	1	Leotiomycetes	1	Rhytismatales	1	Rhytismataceae	1	NA	NA	NA	SH196477.06FU	1
JQ759494	AK1147	ARIZ:AK1147	47	120	AKN	C1	Picea glauca	Pinophyta	Pinaceae	Endophyte	Leotiomycetes (Helotiales)	Fungi	1	Ascomycota	1	Leotiomycetes	1	Helotiales	1	Incertae sedis 2	1	Darkera	1	Darkera sp	SH222480.06FU	1
JQ759495	AK1148	ARIZ:AK1148	47	120	AKN	C1	Picea glauca	Pinophyta	Pinaceae	Endophyte	Leotiomycetes (Helotiales)	Fungi	1	Ascomycota	1	Leotiomycetes	1	Helotiales	1	Incertae sedis 2	1	Darkera	1	Darkera sp	SH222480.06FU	1
JQ759496	AK1149	ARIZ:AK1149	47	120	AKN	C1	Picea glauca	Pinophyta	Pinaceae	Endophyte	Leotiomycetes (Helotiales)	Fungi	1	Ascomycota	1	Leotiomycetes	1	Helotiales	1	Incertae sedis 2	1	Darkera	1	Darkera sp	SH222480.06FU	1
JQ759497	AK1150	ARIZ:AK1150	47	120	AKN	C1	Picea glauca	Pinophyta	Pinaceae	Endophyte	Leotiomycetes (Helotiales)	Fungi	1	Ascomycota	1	Leotiomycetes	1	Helotiales	1	Incertae sedis 2	1	Darkera	1	Darkera sp	SH222480.06FU	1
JQ759498	AK1151	ARIZ:AK1151	47	120	AKN	C1	Picea glauca	Pinophyta	Pinaceae	Endophyte	Leotiomycetes (Helotiales)	Fungi	1	Ascomycota	1	Leotiomycetes	1	Helotiales	1	Incertae sedis 2	1	Darkera	1	Darkera sp	SH222480.06FU	1
JQ759499	AK1152	ARIZ:AK1152	47	120	AKN	C1	Picea glauca	Pinophyta	Pinaceae	Endophyte	Leotiomycetes (Helotiales)	Fungi	1	Ascomycota	1	Leotiomycetes	1	Helotiales	1	Incertae sedis 2	1	Darkera	1	Darkera sp	SH222480.06FU	1
JQ759500	AK1153	ARIZ:AK1153	47	120	AKN	C1	Picea glauca	Pinophyta	Pinaceae	Endophyte	Leotiomycetes (Helotiales)	Fungi	1	Ascomycota	1	Leotiomycetes	1	Helotiales	1	Incertae sedis 2	1	Darkera	1	Darkera sp	SH222480.06FU	1
JQ759501	AK1154	ARIZ:AK1154	51	125	AKN	C1	Picea glauca	Pinophyta	Pinaceae	Endophyte	Leotiomycetes (Rhytismatales)	Fungi	1	Ascomycota	1	Leotiomycetes	1	Rhytismatales	1	Rhytismataceae	1	NA	NA	NA	SH196477.06FU	1
JQ759502	AK1155	ARIZ:AK1155	42	122	AKN	C1	Picea glauca	Pinophyta	Pinaceae	Endophyte	Leotiomycetes (Helotiales)	Fungi	1	Ascomycota	1	Leotiomycetes	1	Helotiales	1	Incertae sedis 2	1	Darkera	1	Darkera sp	SH222480.06FU	1
JQ759503	AK1156	ARIZ:AK1156	51	126	AKN	C1	Picea glauca	Pinophyta	Pinaceae	Endophyte	Leotiomycetes (Rhytismatales)	Fungi	1	Ascomycota	1	Leotiomycetes	1	Rhytismatales	1	Rhytismataceae	1	NA	NA	NA	SH196477.06FU	1
JQ759504	AK1157	ARIZ:AK1157	42	122	AKN	C1	Picea glauca	Pinophyta	Pinaceae	Endophyte	Leotiomycetes (Helotiales)	Fungi	1	Ascomycota	1	Leotiomycetes	1	Helotiales	1	Incertae sedis 2	1	Darkera	1	Darkera sp	SH222480.06FU	1
JQ759505	AK1158	ARIZ:AK1158	42	122	AKN	C1	Picea glauca	Pinophyta	Pinaceae	Endophyte	Leotiomycetes (Helotiales)	Fungi	1	Ascomycota	1	Leotiomycetes	1	Helotiales	1	Incertae sedis 2	1	Darkera	1	Darkera sp	SH222480.06FU	1
JQ759562	AK1221	ARIZ:AK1221	42	122	AKN	C2	Picea glauca	Pinophyta	Pinaceae	Endophyte	Leotiomycetes (Helotiales)	Fungi	1	Ascomycota	1	Leotiomycetes	1	Helotiales	1	Incertae sedis 2	1	Darkera	1	Darkera sp	SH222480.06FU	1
JQ759563	AK1222	ARIZ:AK1222	47	120	AKN	C2	Picea glauca	Pinophyta	Pinaceae	Endophyte	Leotiomycetes (Helotiales)	Fungi	1	Ascomycota	1	Leotiomycetes	1	Helotiales	1	Incertae sedis 2	1	Darkera	1	Darkera sp	SH222480.06FU	1
JQ759564	AK1223	ARIZ:AK1223	49	138	AKN	C2	Picea glauca	Pinophyta	Pinaceae	Endophyte	Leotiomycetes (Rhytismatales)	Fungi	1	Ascomycota	1	Leotiomycetes	1	Rhytismatales	1	Rhytismataceae	1	NA	NA	NA	SH196477.06FU	1
JQ759565	AK1224	ARIZ:AK1224	50	124	AKN	C2	Picea glauca	Pinophyta	Pinaceae	Endophyte	Leotiomycetes (Rhytismatales)	Fungi	1	Ascomycota	1	Leotiomycetes	1	Rhytismatales	1	Rhytismataceae	1	NA	NA	NA	SH196477.06FU	1
JQ759566	AK1225	ARIZ:AK1225	47	120	AKN	C2	Picea glauca	Pinophyta	Pinaceae	Endophyte	Leotiomycetes (Helotiales)	Fungi	1	Ascomycota	1	Leotiomycetes	1	Helotiales	1	Incertae sedis 2	1	Darkera	1	Darkera sp	SH222480.06FU	1
JQ759567	AK1226	ARIZ:AK1226	47	120	AKN	C2	Picea glauca	Pinophyta	Pinaceae	Endophyte	Leotiomycetes (Helotiales)	Fungi	1	Ascomycota	1	Leotiomycetes	1	Helotiales	1	Incertae sedis 2	1	Darkera	1	Darkera sp	SH222480.06FU	1
JQ759568	AK1227	ARIZ:AK1227	50	139	AKN	C2	Picea glauca	Pinophyta	Pinaceae	Endophyte	Leotiomycetes (Rhytismatales)	Fungi	1	Ascomycota	1	Leotiomycetes	1	Rhytismatales	1	Rhytismataceae	1	NA	NA	NA	SH196477.06FU	1
JQ759569	AK1228	ARIZ:AK1228	48	121	AKN	C2	Picea glauca	Pinophyta	Pinaceae	Endophyte	Sordariomycetes (N/A)	Fungi	1	Ascomycota	1	Sordariomycetes	1	Diaporthales	1	Valsaceae	1	NA	NA	NA	SH211793.06FU	0.85
JQ759570	AK1229	ARIZ:AK1229	47	140	AKN	C2	Picea glauca	Pinophyta	Pinaceae	Endophyte	Leotiomycetes (Helotiales)	Fungi	1	Ascomycota	1	Leotiomycetes	1	Helotiales	1	Incertae sedis 2	1	Darkera	1	Darkera sp	SH222480.06FU	1
JQ759571	AK1231	ARIZ:AK1231	47	120	AKN	C2	Picea glauca	Pinophyta	Pinaceae	Endophyte	Leotiomycetes (Helotiales)	Fungi	1	Ascomycota	1	Leotiomycetes	1	Helotiales	1	Incertae sedis 2	1	Darkera	1	Darkera sp	SH222480.06FU	1
JQ759572	AK1232	ARIZ:AK1232	47	120	AKN	C2	Picea glauca	Pinophyta	Pinaceae	Endophyte	Leotiomycetes (Helotiales)	Fungi	1	Ascomycota	1	Leotiomycetes	1	Helotiales	1	Incertae sedis 2	1	Darkera	1	Darkera sp	SH222480.06FU	1
JQ759573	AK1233	ARIZ:AK1233	47	120	AKN	C2	Picea glauca	Pinophyta	Pinaceae	Endophyte	Leotiomycetes (Helotiales)	Fungi	1	Ascomycota	1	Leotiomycetes	1	Helotiales	1	Incertae sedis 2	1	Darkera	1	Darkera sp	SH222480.06FU	1
JQ759574	AK1234	ARIZ:AK1234	42	122	AKN	C2	Picea glauca	Pinophyta	Pinaceae	Endophyte	Leotiomycetes (Helotiales)	Fungi	1	Ascomycota	1	Leotiomycetes	1	Helotiales	1	Incertae sedis 2	1	Darkera	1	Darkera sp	SH222480.06FU	1
JQ759575	AK1235	ARIZ:AK1235	47	120	AKN	C2	Picea glauca	Pinophyta	Pinaceae	Endophyte	Leotiomycetes (Helotiales)	Fungi	1	Ascomycota	1	Leotiomycetes	1	Helotiales	1	Incertae sedis 2	1	Darkera	1	Darkera sp	SH222480.06FU	1
JQ759576	AK1236	ARIZ:AK1236	42	122	AKN	C2	Picea glauca	Pinophyta	Pinaceae	Endophyte	Leotiomycetes (Helotiales)	Fungi	1	Ascomycota	1	Leotiomycetes	1	Helotiales	1	Incertae sedis 2	1	Darkera	1	Darkera sp	SH222480.06FU	1
JQ759577	AK1237	ARIZ:AK1237	42	122	AKN	C2	Picea glauca	Pinophyta	Pinaceae	Endophyte	Leotiomycetes (Helotiales)	Fungi	1	Ascomycota	1	Leotiomycetes	1	Helotiales	1	Incertae sedis 2	1	Darkera	1	Darkera sp	SH222480.06FU	1
JQ759578	AK1238	ARIZ:AK1238	47	120	AKN	C2	Picea glauca	Pinophyta	Pinaceae	Endophyte	Leotiomycetes (Helotiales)	Fungi	1	Ascomycota	1	Leotiomycetes	1	Helotiales	1	Incertae sedis 2	1	Darkera	1	Darkera sp	SH222480.06FU	1
JQ759579	AK1239	ARIZ:AK1239	42	122	AKN	C2	Picea glauca	Pinophyta	Pinaceae	Endophyte	Leotiomycetes (Helotiales)	Fungi	1	Ascomycota	1	Leotiomycetes	1	Helotiales	1	Incertae sedis 2	1	Darkera	1	Darkera sp	SH222480.06FU	1
JQ759580	AK1240	ARIZ:AK1240	47	120	AKN	C2	Picea glauca	Pinophyta	Pinaceae	Endophyte	Leotiomycetes (Helotiales)	Fungi	1	Ascomycota	1	Leotiomycetes	1	Helotiales	1	Incertae sedis 2	1	Darkera	1	Darkera sp	SH222480.06FU	1
JQ759581	AK1241	ARIZ:AK1241	47	120	AKN	C2	Picea glauca	Pinophyta	Pinaceae	Endophyte	Leotiomycetes (Helotiales)	Fungi	1	Ascomycota	1	Leotiomycetes	1	Helotiales	1	Incertae sedis 2	1	Darkera	1	Darkera sp	SH222480.06FU	1
JQ759582	AK1242	ARIZ:AK1242	42	122	AKN	C2	Picea glauca	Pinophyta	Pinaceae	Endophyte	Leotiomycetes (Helotiales)	Fungi	1	Ascomycota	1	Leotiomycetes	1	Helotiales	1	Incertae sedis 2	1	Darkera	1	Darkera sp	SH222480.06FU	1
JQ759583	AK1243	ARIZ:AK1243	42	122	AKN	C2	Picea glauca	Pinophyta	Pinaceae	Endophyte	Leotiomycetes (Helotiales)	Fungi	1	Ascomycota	1	Leotiomycetes	1	Helotiales	1	Incertae sedis 2	1	Darkera	1	Darkera sp	SH222480.06FU	1
JQ759584	AK1244	ARIZ:AK1244	47	120	AKN	C2	Picea glauca	Pinophyta	Pinaceae	Endophyte	Leotiomycetes (Helotiales)	Fungi	1	Ascomycota	1	Leotiomycetes	1	Helotiales	1	Incertae sedis 2	1	Darkera	1	Darkera sp	SH222480.06FU	1
JQ759585	AK1245	ARIZ:AK1245	47	120	AKN	C2	Picea glauca	Pinophyta	Pinaceae	Endophyte	Leotiomycetes (Helotiales)	Fungi	1	Ascomycota	1	Leotiomycetes	1	Helotiales	1	Incertae sedis 2	1	Darkera	1	Darkera sp	SH222480.06FU	1
JQ759586	AK1246	ARIZ:AK1246	49	141	AKN	C2	Picea glauca	Pinophyta	Pinaceae	Endophyte	Leotiomycetes (Rhytismatales)	Fungi	1	Ascomycota	1	Leotiomycetes	1	Rhytismatales	1	Rhytismataceae	1	NA	NA	NA	SH196477.06FU	1
JQ759587	AK1247	ARIZ:AK1247	49	142	AKN	C2	Picea glauca	Pinophyta	Pinaceae	Endophyte	Leotiomycetes (Rhytismatales)	Fungi	1	Ascomycota	1	Leotiomycetes	1	Rhytismatales	1	Rhytismataceae	1	NA	NA	NA	SH196477.06FU	1
JQ759588	AK1248	ARIZ:AK1248	50	143	AKN	C2	Picea glauca	Pinophyta	Pinaceae	Endophyte	Leotiomycetes (N/A)	Fungi	1	Ascomycota	1	Leotiomycetes	1	Rhytismatales	1	Rhytismataceae	1	NA	NA	NA	NA	NA
JQ759589	AK1250	ARIZ:AK1250	48	121	AKN	C2	Picea glauca	Pinophyta	Pinaceae	Endophyte	Sordariomycetes (N/A)	Fungi	1	Ascomycota	1	Sordariomycetes	1	Diaporthales	1	Valsaceae	1	NA	NA	NA	SH211793.06FU	0.95
JQ759590	AK1251	ARIZ:AK1251	42	122	AKN	C2	Picea glauca	Pinophyta	Pinaceae	Endophyte	Leotiomycetes (Helotiales)	Fungi	1	Ascomycota	1	Leotiomycetes	1	Helotiales	1	Incertae sedis 2	1	Darkera	1	Darkera sp	SH222480.06FU	1
JQ759591	AK1252	ARIZ:AK1252	49	138	AKN	C2	Picea glauca	Pinophyta	Pinaceae	Endophyte	Leotiomycetes (Rhytismatales)	Fungi	1	Ascomycota	1	Leotiomycetes	1	Rhytismatales	1	Rhytismataceae	1	NA	NA	NA	SH196477.06FU	1
JQ759592	AK1253	ARIZ:AK1253	47	120	AKN	C2	Picea glauca	Pinophyta	Pinaceae	Endophyte	Leotiomycetes (Helotiales)	Fungi	1	Ascomycota	1	Leotiomycetes	1	Helotiales	1	Incertae sedis 2	1	Darkera	1	Darkera sp	SH222480.06FU	1
JQ759593	AK1254	ARIZ:AK1254	47	120	AKN	C2	Picea glauca	Pinophyta	Pinaceae	Endophyte	Leotiomycetes (Helotiales)	Fungi	1	Ascomycota	1	Leotiomycetes	1	Helotiales	1	Incertae sedis 2	1	Darkera	1	Darkera sp	SH222480.06FU	1
JQ759594	AK1255	ARIZ:AK1255	47	120	AKN	C2	Picea glauca	Pinophyta	Pinaceae	Endophyte	Leotiomycetes (Helotiales)	Fungi	1	Ascomycota	1	Leotiomycetes	1	Helotiales	1	Incertae sedis 2	1	Darkera	1	Darkera sp	SH222480.06FU	1
JQ759595	AK1256	ARIZ:AK1256	47	120	AKN	C2	Picea glauca	Pinophyta	Pinaceae	Endophyte	Leotiomycetes (Helotiales)	Fungi	1	Ascomycota	1	Leotiomycetes	1	Helotiales	1	Incertae sedis 2	1	Darkera	1	Darkera sp	SH222480.06FU	1
JQ759596	AK1257	ARIZ:AK1257	47	120	AKN	C2	Picea glauca	Pinophyta	Pinaceae	Endophyte	Leotiomycetes (Helotiales)	Fungi	1	Ascomycota	1	Leotiomycetes	1	Helotiales	1	Incertae sedis 2	1	Darkera	1	Darkera sp	SH222480.06FU	1
JQ759597	AK1258	ARIZ:AK1258	47	120	AKN	C2	Picea glauca	Pinophyta	Pinaceae	Endophyte	Leotiomycetes (Helotiales)	Fungi	1	Ascomycota	1	Leotiomycetes	1	Helotiales	1	Incertae sedis 2	1	Darkera	1	Darkera sp	SH222480.06FU	1
JQ759598	AK1259	ARIZ:AK1259	47	120	AKN	C2	Picea glauca	Pinophyta	Pinaceae	Endophyte	Leotiomycetes (Helotiales)	Fungi	1	Ascomycota	1	Leotiomycetes	1	Helotiales	1	Incertae sedis 2	1	Darkera	1	Darkera sp	SH222480.06FU	1
JQ759875	AK1590	ARIZ:AK1590	22	173	AKN	C3	Picea glauca	Pinophyta	Pinaceae	Endophyte	Dothideomycetes (Capnodiales)	Fungi	1	Ascomycota	1	Dothideomycetes	1	Capnodiales	1	Davidiellaceae	1	Cladosporium	1	Cladosporium sp 4 MU 2012	SH196754.06FU	1
JQ759876	AK1592	ARIZ:AK1592	50	124	AKN	C3	Picea glauca	Pinophyta	Pinaceae	Endophyte	Leotiomycetes (Rhytismatales)	Fungi	1	Ascomycota	1	Leotiomycetes	1	Rhytismatales	1	Rhytismataceae	1	NA	NA	NA	SH196477.06FU	1
JQ759877	AK1593	ARIZ:AK1593	50	143	AKN	C3	Picea glauca	Pinophyta	Pinaceae	Endophyte	Leotiomycetes (Rhytismatales)	Fungi	1	Ascomycota	1	Leotiomycetes	1	Rhytismatales	0.87	Rhytismataceae	0.87	NA	NA	NA	SH196477.06FU	0.87
KX909145	AK1594	ARIZ:AK1594	1	1	AKE	C1	Salix pulchra	Angiospermae	Salicaceae	DLF	Sordariomycetes (Xylariales)	Fungi	1	Ascomycota	1	Sordariomycetes	1	Xylariales	1	Xylariaceae	1	NA	NA	NA	SH224035.06FU	1
KU683770	AK1595	ARIZ:AK1595	63	174	AKE	C1	Salix pulchra	Angiospermae	Salicaceae	DLF	Sordariomycetes (Xylariales)	Fungi	1	Ascomycota	0.99	Sordariomycetes	0.99	Xylariales	0.86	NA	NA	NA	NA	NA	NA	NA
KX909146	AK1596	ARIZ:AK1596	7	8	AKE	C1	Salix pulchra	Angiospermae	Salicaceae	DLF	Sordariomycetes (N/A)	Fungi	1	Ascomycota	1	Sordariomycetes	1	NA	NA	NA	NA	NA	NA	NA	SH234917.06FU	0.98
KU683771	AK1597	ARIZ:AK1597	10	11	AKE	C1	Betula nana	Angiospermae	Betulaceae	DLF	Sordariomycetes (Xylariales)	Fungi	1	Ascomycota	1	Sordariomycetes	1	Xylariales	1	Xylariaceae	1	NA	NA	NA	SH224035.06FU	1
KX909044	AK1598	ARIZ:AK1598	12	13	AKE	C1	Betula nana	Angiospermae	Betulaceae	DLF	Sordariomycetes (Xylariales)	Fungi	1	Ascomycota	1	Sordariomycetes	1	Xylariales	1	Xylariaceae	1	NA	NA	NA	SH224035.06FU	1
KU683772	AK1599	ARIZ:AK1599	10	11	AKE	C1	Picea glauca	Pinophyta	Pinaceae	DLF	Sordariomycetes (Xylariales)	Fungi	1	Ascomycota	1	Sordariomycetes	1	Xylariales	1	Xylariaceae	1	NA	NA	NA	SH224035.06FU	1
KU683773	AK1600	ARIZ:AK1600	10	11	AKE	C1	Picea glauca	Pinophyta	Pinaceae	DLF	Sordariomycetes (Xylariales)	Fungi	1	Ascomycota	1	Sordariomycetes	1	Xylariales	1	Xylariaceae	1	NA	NA	NA	SH224035.06FU	1
KX909065	AK1601	ARIZ:AK1601	3	3	AKE	C1	Picea glauca	Pinophyta	Pinaceae	DLF	Sordariomycetes (Coniochaetales)	Fungi	1	Ascomycota	1	Sordariomycetes	1	Coniochaetales	1	Coniochaetaceae	1	Lecythophora	1	Lecythophora hoffmannii	SH226439.06FU	1
KX909066	AK1602	ARIZ:AK1602	30	48	AKE	C1	Picea glauca	Pinophyta	Pinaceae	DLF	Pezizomycetes (Pezizales)	Fungi	1	Ascomycota	1	Pezizomycetes	1	Pezizales	1	Pyronemataceae	1	Geopyxis	1	Geopyxis sp	SH229656.06FU	1
KU683774	AK1603	ARIZ:AK1603	10	11	AKE	C1	Picea glauca	Pinophyta	Pinaceae	DLF	Sordariomycetes (Xylariales)	Fungi	1	Ascomycota	1	Sordariomycetes	1	Xylariales	1	Xylariaceae	1	NA	NA	NA	SH224035.06FU	1
KU683775	AK1604	ARIZ:AK1604	4	4	AKE	C1	Picea glauca	Pinophyta	Pinaceae	DLF	Sordariomycetes (Xylariales)	Fungi	1	Ascomycota	1	Sordariomycetes	1	Xylariales	1	Xylariaceae	1	NA	NA	NA	SH224035.06FU	1
KX909067	AK1605	ARIZ:AK1605	21	30	AKE	C1	Picea glauca	Pinophyta	Pinaceae	DLF	Pezizomycetes (Pezizales)	Fungi	1	Ascomycota	1	Pezizomycetes	1	Pezizales	1	Pyronemataceae	1	Geopyxis	1	Geopyxis sp	SH229656.06FU	1
KU683776	AK1606	ARIZ:AK1606	2	2	AKE	C1	Picea glauca	Pinophyta	Pinaceae	DLF	Sordariomycetes (Xylariales)	Fungi	1	Ascomycota	1	Sordariomycetes	1	Xylariales	1	Xylariaceae	1	NA	NA	NA	SH224035.06FU	1
KX909068	AK1607	ARIZ:AK1607	8	9	AKE	C1	Picea glauca	Pinophyta	Pinaceae	DLF	Sordariomycetes (N/A)	Fungi	1	Ascomycota	1	Sordariomycetes	1	NA	NA	NA	NA	NA	NA	NA	SH234917.06FU	0.97
KX909069	AK1608	ARIZ:AK1608	21	30	AKE	C1	Picea glauca	Pinophyta	Pinaceae	DLF	Pezizomycetes (Pezizales)	Fungi	1	Ascomycota	1	Pezizomycetes	1	Pezizales	1	Pyronemataceae	1	Geopyxis	1	Geopyxis sp	SH229656.06FU	1
KX909070	AK1611	ARIZ:AK1611	30	48	AKE	C1	Picea glauca	Pinophyta	Pinaceae	DLF	Pezizomycetes (Pezizales)	Fungi	1	Ascomycota	1	Pezizomycetes	1	Pezizales	1	Pyronemataceae	1	Geopyxis	1	Geopyxis sp	SH229656.06FU	1
KX909071	AK1612	ARIZ:AK1612	21	30	AKE	C1	Picea glauca	Pinophyta	Pinaceae	DLF	Pezizomycetes (Pezizales)	Fungi	1	Ascomycota	1	Pezizomycetes	1	Pezizales	1	Pyronemataceae	1	Geopyxis	1	Geopyxis sp	SH229656.06FU	1
KU683777	AK1614	ARIZ:AK1614	5	6	AKE	C1	Picea glauca	Pinophyta	Pinaceae	DLF	Sordariomycetes (Xylariales)	Fungi	1	Ascomycota	1	Sordariomycetes	1	Xylariales	1	Xylariaceae	1	NA	NA	NA	SH224035.06FU	1
KU683778	AK1615	ARIZ:AK1615	10	11	AKE	C2	Salix pulchra	Angiospermae	Salicaceae	DLF	Sordariomycetes (Xylariales)	Fungi	1	Ascomycota	1	Sordariomycetes	1	Xylariales	1	Xylariaceae	1	NA	NA	NA	SH224035.06FU	1
KX909147	AK1616	ARIZ:AK1616	21	30	AKE	C2	Salix pulchra	Angiospermae	Salicaceae	DLF	Pezizomycetes (Pezizales)	Fungi	1	Ascomycota	1	Pezizomycetes	1	Pezizales	1	Pyronemataceae	1	Geopyxis	1	Geopyxis sp	SH229656.06FU	1
KU683779	AK1617	ARIZ:AK1617	10	11	AKE	C2	Salix pulchra	Angiospermae	Salicaceae	DLF	Sordariomycetes (Xylariales)	Fungi	1	Ascomycota	1	Sordariomycetes	1	Xylariales	1	Xylariaceae	1	NA	NA	NA	SH224035.06FU	1
KU683780	AK1618	ARIZ:AK1618	2	2	AKE	C2	Salix pulchra	Angiospermae	Salicaceae	DLF	Sordariomycetes (Xylariales)	Fungi	1	Ascomycota	1	Sordariomycetes	1	Xylariales	1	Xylariaceae	1	NA	NA	NA	SH224035.06FU	1
KX909148	AK1619	ARIZ:AK1619	26	41	AKE	C2	Salix pulchra	Angiospermae	Salicaceae	DLF	Pezizomycetes (Pezizales)	Fungi	1	Ascomycota	1	Pezizomycetes	1	Pezizales	1	Pyronemataceae	1	Geopyxis	1	Geopyxis sp	SH229656.06FU	1
KX909149	AK1620	ARIZ:AK1620	14	16	AKE	C2	Salix pulchra	Angiospermae	Salicaceae	DLF	Sordariomycetes (N/A)	Fungi	1	Ascomycota	1	Sordariomycetes	1	NA	NA	NA	NA	NA	NA	NA	SH234917.06FU	0.82
KP202974	AK1621	ARIZ:AK1621	16	175	AKE	C2	Betula nana	Angiospermae	Betulaceae	DLF	Eurotiomycetes (Eurotiales)	Fungi	1	Ascomycota	1	Eurotiomycetes	1	Eurotiales	1	Trichocomaceae	1	Penicillium	0.99	Penicillium sp	SH201041.06FU	0.89
KU683781	AK1622	ARIZ:AK1622	10	31	AKE	C2	Betula nana	Angiospermae	Betulaceae	DLF	Sordariomycetes (Xylariales)	Fungi	1	Ascomycota	1	Sordariomycetes	1	Xylariales	1	Xylariaceae	1	NA	NA	NA	SH224035.06FU	1
KX909045	AK1623	ARIZ:AK1623	30	48	AKE	C2	Betula nana	Angiospermae	Betulaceae	DLF	Pezizomycetes (Pezizales)	Fungi	1	Ascomycota	1	Pezizomycetes	1	Pezizales	1	Pyronemataceae	1	Geopyxis	1	Geopyxis sp	SH229656.06FU	1
KX909046	AK1624	ARIZ:AK1624	34	52	AKE	C2	Betula nana	Angiospermae	Betulaceae	DLF	N/A	Fungi	1	Ascomycota	0.9	NA	NA	NA	NA	NA	NA	NA	NA	NA	NA	NA
KU683782	AK1625	ARIZ:AK1625	10	11	AKE	C2	Betula nana	Angiospermae	Betulaceae	DLF	Sordariomycetes (Xylariales)	Fungi	1	Ascomycota	1	Sordariomycetes	1	Xylariales	1	Xylariaceae	1	NA	NA	NA	SH224035.06FU	1
KU683783	AK1626	ARIZ:AK1626	10	11	AKE	C2	Betula nana	Angiospermae	Betulaceae	DLF	Sordariomycetes (Xylariales)	Fungi	1	Ascomycota	1	Sordariomycetes	1	Xylariales	1	Xylariaceae	1	NA	NA	NA	SH224035.06FU	1
KX909072	AK1627	ARIZ:AK1627	40	176	AKE	C2	Picea glauca	Pinophyta	Pinaceae	DLF	Leotiomycetes (N/A)	Fungi	1	Ascomycota	1	Leotiomycetes	1	NA	NA	NA	NA	NA	NA	NA	SH198274.06FU	0.85
KX909073	AK1628	ARIZ:AK1628	40	176	AKE	C2	Picea glauca	Pinophyta	Pinaceae	DLF	N/A	Fungi	1	Ascomycota	1	Leotiomycetes	1	NA	NA	NA	NA	NA	NA	NA	NA	NA
KX909074	AK1629	ARIZ:AK1629	23	36	AKE	C2	Picea glauca	Pinophyta	Pinaceae	DLF	Pezizomycetes (Pezizales)	Fungi	1	Ascomycota	1	Pezizomycetes	1	Pezizales	1	Pezizaceae	1	Peziza	1	Peziza sp	SH217067.06FU	1
KX909075	AK1630	ARIZ:AK1630	21	30	AKE	C2	Picea glauca	Pinophyta	Pinaceae	DLF	Pezizomycetes (Pezizales)	Fungi	1	Ascomycota	1	Pezizomycetes	1	Pezizales	1	Pyronemataceae	1	Geopyxis	1	Geopyxis sp	SH229656.06FU	1
KX909076	AK1631	ARIZ:AK1631	30	48	AKE	C2	Picea glauca	Pinophyta	Pinaceae	DLF	Pezizomycetes (Pezizales)	Fungi	1	Ascomycota	1	Pezizomycetes	1	Pezizales	1	Pyronemataceae	1	Geopyxis	1	Geopyxis sp	SH229656.06FU	1
KX909077	AK1632	ARIZ:AK1632	30	48	AKE	C2	Picea glauca	Pinophyta	Pinaceae	DLF	Pezizomycetes (Pezizales)	Fungi	1	Ascomycota	1	Pezizomycetes	1	Pezizales	1	Pyronemataceae	1	Geopyxis	1	Geopyxis sp	SH229656.06FU	1
KU683784	AK1635	ARIZ:AK1635	10	11	AKE	C3	Salix pulchra	Angiospermae	Salicaceae	DLF	Sordariomycetes (Xylariales)	Fungi	1	Ascomycota	1	Sordariomycetes	1	Xylariales	1	Xylariaceae	1	NA	NA	NA	SH224035.06FU	1
KX909150	AK1636	ARIZ:AK1636	9	10	AKE	C3	Salix pulchra	Angiospermae	Salicaceae	DLF	Sordariomycetes (Xylariales)	Fungi	1	Ascomycota	1	Sordariomycetes	1	Xylariales	1	Xylariaceae	1	NA	NA	NA	SH224035.06FU	1
KX909151	AK1638	ARIZ:AK1638	21	30	AKE	C3	Salix pulchra	Angiospermae	Salicaceae	DLF	Pezizomycetes (Pezizales)	Fungi	1	Ascomycota	1	Pezizomycetes	1	Pezizales	1	Pyronemataceae	1	Geopyxis	1	Geopyxis sp	SH229656.06FU	1
KX909047	AK1639	ARIZ:AK1639	22	35	AKE	C3	Betula nana	Angiospermae	Betulaceae	DLF	Dothideomycetes (Capnodiales)	Fungi	1	Ascomycota	1	Dothideomycetes	1	Capnodiales	1	Davidiellaceae	1	Cladosporium	1	Cladosporium sp 4 MU 2012	SH196754.06FU	1
KU683785	AK1640	ARIZ:AK1640	10	11	AKE	C3	Betula nana	Angiospermae	Betulaceae	DLF	Sordariomycetes (Xylariales)	Fungi	1	Ascomycota	1	Sordariomycetes	1	Xylariales	1	Xylariaceae	1	NA	NA	NA	SH224035.06FU	1
KX909078	AK1641	ARIZ:AK1641	21	30	AKE	C3	Picea glauca	Pinophyta	Pinaceae	DLF	Pezizomycetes (Pezizales)	Fungi	1	Ascomycota	1	Pezizomycetes	1	Pezizales	1	Pyronemataceae	1	Geopyxis	1	Geopyxis sp	SH229656.06FU	1
KX909079	AK1642	ARIZ:AK1642	21	30	AKE	C3	Picea glauca	Pinophyta	Pinaceae	DLF	Pezizomycetes (Pezizales)	Fungi	1	Ascomycota	1	Pezizomycetes	1	Pezizales	1	Pyronemataceae	1	Geopyxis	1	Geopyxis sp	SH229656.06FU	1
KX909080	AK1643	ARIZ:AK1643	42	68	AKE	C3	Picea glauca	Pinophyta	Pinaceae	DLF	Leotiomycetes (Helotiales)	Fungi	1	Ascomycota	1	Leotiomycetes	1	Helotiales	1	Incertae sedis 2	1	Darkera	1	Darkera sp	SH222480.06FU	1
KX909081	AK1644	ARIZ:AK1644	20	29	AKE	C3	Picea glauca	Pinophyta	Pinaceae	DLF	N/A	Fungi	1	Fungi unidentified	1	NA	NA	NA	NA	NA	NA	NA	NA	NA	SH196479.06FU	1
KX909082	AK1645	ARIZ:AK1645	48	177	AKE	C3	Picea glauca	Pinophyta	Pinaceae	DLF	Sordariomycetes (Diaporthales)	Fungi	1	Ascomycota	1	Sordariomycetes	1	Diaporthales	1	Valsaceae	1	NA	NA	NA	NA	NA
KX909083	AK1646	ARIZ:AK1646	47	140	AKE	C3	Picea glauca	Pinophyta	Pinaceae	DLF	Leotiomycetes (Helotiales)	Fungi	1	Ascomycota	1	Leotiomycetes	1	Helotiales	1	Incertae sedis 2	1	Darkera	1	Darkera sp	SH222480.06FU	1
KX909084	AK1648	ARIZ:AK1648	21	30	AKE	C3	Picea glauca	Pinophyta	Pinaceae	DLF	Pezizomycetes (Pezizales)	Fungi	1	Ascomycota	1	Pezizomycetes	1	Pezizales	1	Pyronemataceae	1	Geopyxis	1	Geopyxis sp	SH229656.06FU	1
KX909085	AK1649	ARIZ:AK1649	42	68	AKE	C3	Picea glauca	Pinophyta	Pinaceae	DLF	Leotiomycetes (Helotiales)	Fungi	1	Ascomycota	1	Leotiomycetes	1	Helotiales	1	Incertae sedis 2	1	Darkera	1	Darkera sp	SH222480.06FU	1
KX909086	AK1651	ARIZ:AK1651	41	178	AKE	C3	Picea glauca	Pinophyta	Pinaceae	DLF	Dothideomycetes (Dothideales)	Fungi	1	Ascomycota	1	Dothideomycetes	1	Dothideales	0.84	Dothioraceae	0.83	NA	NA	NA	SH231446.06FU	0.83
KX909087	AK1652	ARIZ:AK1652	22	173	AKE	C3	Picea glauca	Pinophyta	Pinaceae	DLF	Dothideomycetes (Capnodiales)	Fungi	1	Ascomycota	1	Dothideomycetes	1	Capnodiales	1	Davidiellaceae	1	Cladosporium	1	Cladosporium sp 4 MU 2012	SH196754.06FU	1
KX909088	AK1653	ARIZ:AK1653	1	1	AKE	C3	Picea glauca	Pinophyta	Pinaceae	DLF	Sordariomycetes (Xylariales)	Fungi	1	Ascomycota	1	Sordariomycetes	1	Xylariales	1	Xylariaceae	1	NA	NA	NA	SH224035.06FU	1
KU683786	AK1654	ARIZ:AK1654	4	4	AKE	C3	Picea glauca	Pinophyta	Pinaceae	DLF	Sordariomycetes (Xylariales)	Fungi	1	Ascomycota	1	Sordariomycetes	1	Xylariales	1	Xylariaceae	1	NA	NA	NA	SH224035.06FU	1
KX909089	AK1655	ARIZ:AK1655	21	30	AKE	C3	Picea glauca	Pinophyta	Pinaceae	DLF	Pezizomycetes (Pezizales)	Fungi	1	Ascomycota	1	Pezizomycetes	1	Pezizales	1	Pyronemataceae	1	Geopyxis	1	Geopyxis sp	SH229656.06FU	1
KX909090	AK1656	ARIZ:AK1656	30	48	AKE	C3	Picea glauca	Pinophyta	Pinaceae	DLF	Pezizomycetes (Pezizales)	Fungi	1	Ascomycota	1	Pezizomycetes	1	Pezizales	1	Pyronemataceae	1	Geopyxis	1	Geopyxis sp	SH229656.06FU	1
KX909091	AK1658	ARIZ:AK1658	42	68	AKE	C3	Picea glauca	Pinophyta	Pinaceae	DLF	Leotiomycetes (Helotiales)	Fungi	1	Ascomycota	1	Leotiomycetes	1	Helotiales	1	Incertae sedis 2	1	Darkera	1	Darkera sp	SH222480.06FU	1
KX909092	AK1660	ARIZ:AK1660	48	179	AKE	C3	Picea glauca	Pinophyta	Pinaceae	DLF	Sordariomycetes (N/A)	Fungi	1	Ascomycota	1	Sordariomycetes	1	Diaporthales	1	Valsaceae	1	NA	NA	NA	SH211793.06FU	0.83
KX909093	AK1661	ARIZ:AK1661	42	68	AKE	C3	Picea glauca	Pinophyta	Pinaceae	DLF	Leotiomycetes (Helotiales)	Fungi	1	Ascomycota	1	Leotiomycetes	1	Helotiales	1	Incertae sedis 2	1	Darkera	1	Darkera sp	SH222480.06FU	1
KX909152	AK1662	ARIZ:AK1662	35	57	AKE	C1	Salix pulchra	Angiospermae	Salicaceae	LLF	Sordariomycetes (Coniochaetales)	Fungi	1	Ascomycota	1	Sordariomycetes	1	Coniochaetales	1	Coniochaetaceae	1	Lecythophora	1	Lecythophora sp	SH226452.06FU	1
KX909153	AK1664	ARIZ:AK1664	12	13	AKE	C1	Salix pulchra	Angiospermae	Salicaceae	LLF	Sordariomycetes (Xylariales)	Fungi	1	Ascomycota	1	Sordariomycetes	1	Xylariales	1	Xylariaceae	1	NA	NA	NA	SH224035.06FU	1
KX909154	AK1666	ARIZ:AK1666	64	180	AKE	C1	Salix pulchra	Angiospermae	Salicaceae	LLF	Dothideomycetes (Dothideales)	Fungi	1	Ascomycota	1	Dothideomycetes	1	Dothideales	1	Dothideaceae	0.92	Endoconidioma	0.92	Endoconidioma populi	SH231447.06FU	0.92
KX909155	AK1668	ARIZ:AK1668	55	137	AKE	C1	Salix pulchra	Angiospermae	Salicaceae	LLF	Eurotiomycetes (Eurotiales)	Fungi	1	Ascomycota	1	Eurotiomycetes	1	Eurotiales	1	Trichocomaceae	1	Aspergillus	0.96	Aspergillus fumisynnematus	SH199401.06FU	0.95
KX909156	AK1669	ARIZ:AK1669	12	13	AKE	C1	Salix pulchra	Angiospermae	Salicaceae	LLF	Sordariomycetes (Xylariales)	Fungi	1	Ascomycota	1	Sordariomycetes	1	Xylariales	1	Xylariaceae	1	NA	NA	NA	SH224035.06FU	1
KX909157	AK1670	ARIZ:AK1670	6	32	AKE	C1	Salix pulchra	Angiospermae	Salicaceae	LLF	Sordariomycetes (Coniochaetales)	Fungi	1	Ascomycota	1	Sordariomycetes	1	Coniochaetales	1	Coniochaetaceae	1	Lecythophora	1	Lecythophora hoffmannii	SH226439.06FU	1
KX909158	AK1672	ARIZ:AK1672	7	8	AKE	C1	Salix pulchra	Angiospermae	Salicaceae	LLF	Sordariomycetes (N/A)	Fungi	1	Ascomycota	1	Sordariomycetes	1	NA	NA	NA	NA	NA	NA	NA	SH234917.06FU	0.89
KU683787	AK1673	ARIZ:AK1673	10	11	AKE	C1	Salix pulchra	Angiospermae	Salicaceae	LLF	Sordariomycetes (Xylariales)	Fungi	1	Ascomycota	1	Sordariomycetes	1	Xylariales	1	Xylariaceae	1	NA	NA	NA	SH224035.06FU	1
KU683788	AK1674	ARIZ:AK1674	10	11	AKE	C1	Betula nana	Angiospermae	Betulaceae	LLF	Sordariomycetes (Xylariales)	Fungi	1	Ascomycota	1	Sordariomycetes	1	Xylariales	1	Xylariaceae	1	NA	NA	NA	SH224035.06FU	1
KX909048	AK1675	ARIZ:AK1675	3	3	AKE	C1	Betula nana	Angiospermae	Betulaceae	LLF	Sordariomycetes (Coniochaetales)	Fungi	1	Ascomycota	1	Sordariomycetes	1	Coniochaetales	1	Coniochaetaceae	1	Lecythophora	1	Lecythophora hoffmannii	SH226439.06FU	1
KU683789	AK1676	ARIZ:AK1676	5	6	AKE	C1	Betula nana	Angiospermae	Betulaceae	LLF	Sordariomycetes (Xylariales)	Fungi	1	Ascomycota	1	Sordariomycetes	1	Xylariales	1	Xylariaceae	1	NA	NA	NA	SH224035.06FU	1
KX909049	AK1677	ARIZ:AK1677	9	10	AKE	C1	Betula nana	Angiospermae	Betulaceae	LLF	Sordariomycetes (Xylariales)	Fungi	1	Ascomycota	1	Sordariomycetes	1	Xylariales	1	Xylariaceae	1	NA	NA	NA	SH224035.06FU	1
KX909050	AK1678	ARIZ:AK1678	3	3	AKE	C1	Betula nana	Angiospermae	Betulaceae	LLF	Sordariomycetes (Coniochaetales)	Fungi	1	Ascomycota	1	Sordariomycetes	1	Coniochaetales	1	Coniochaetaceae	1	Lecythophora	1	Lecythophora hoffmannii	SH226439.06FU	1
KU683790	AK1679	ARIZ:AK1679	4	159	AKE	C1	Betula nana	Angiospermae	Betulaceae	LLF	Sordariomycetes (Xylariales)	Fungi	1	Ascomycota	1	Sordariomycetes	1	Xylariales	1	Xylariaceae	1	NA	NA	NA	SH224035.06FU	1
KU683791	AK1680	ARIZ:AK1680	4	4	AKE	C1	Betula nana	Angiospermae	Betulaceae	LLF	Sordariomycetes (Xylariales)	Fungi	1	Ascomycota	1	Sordariomycetes	1	Xylariales	1	Xylariaceae	1	NA	NA	NA	SH224035.06FU	1
KX909051	AK1681	ARIZ:AK1681	22	181	AKE	C1	Betula nana	Angiospermae	Betulaceae	LLF	Dothideomycetes (Capnodiales)	Fungi	1	Ascomycota	1	Dothideomycetes	1	Capnodiales	1	Davidiellaceae	1	Cladosporium	0.94	Cladosporium sp 4 MU 2012	SH196754.06FU	0.94
KU683792	AK1682	ARIZ:AK1682	10	11	AKE	C1	Betula nana	Angiospermae	Betulaceae	LLF	Sordariomycetes (Xylariales)	Fungi	1	Ascomycota	1	Sordariomycetes	1	Xylariales	1	Xylariaceae	1	NA	NA	NA	SH224035.06FU	1
KU683793	AK1683	ARIZ:AK1683	5	6	AKE	C1	Betula nana	Angiospermae	Betulaceae	LLF	Sordariomycetes (Xylariales)	Fungi	1	Ascomycota	1	Sordariomycetes	1	Xylariales	1	Xylariaceae	1	NA	NA	NA	SH224035.06FU	1
KX909052	AK1684	ARIZ:AK1684	29	46	AKE	C1	Betula nana	Angiospermae	Betulaceae	LLF	Dothideomycetes (Pleosporales)	Fungi	1	Ascomycota	1	Dothideomycetes	1	Pleosporales	1	Pleosporaceae	1	Alternaria	1	Alternaria sp 3 MU 2012	SH224849.06FU	0.94
KU683794	AK1685	ARIZ:AK1685	2	2	AKE	C1	Betula nana	Angiospermae	Betulaceae	LLF	Sordariomycetes (Xylariales)	Fungi	1	Ascomycota	1	Sordariomycetes	1	Xylariales	1	Xylariaceae	1	NA	NA	NA	SH224035.06FU	1
KU683795	AK1686	ARIZ:AK1686	2	2	AKE	C1	Betula nana	Angiospermae	Betulaceae	LLF	Sordariomycetes (Xylariales)	Fungi	1	Ascomycota	1	Sordariomycetes	1	Xylariales	1	Xylariaceae	1	NA	NA	NA	SH224035.06FU	1
KX909053	AK1687	ARIZ:AK1687	14	16	AKE	C1	Betula nana	Angiospermae	Betulaceae	LLF	Sordariomycetes (N/A)	Fungi	1	Ascomycota	1	Sordariomycetes	1	NA	NA	NA	NA	NA	NA	NA	SH234917.06FU	0.99
KX909054	AK1688	ARIZ:AK1688	24	39	AKE	C1	Betula nana	Angiospermae	Betulaceae	LLF	Pezizomycetes (Pezizales)	Fungi	1	Ascomycota	1	Pezizomycetes	1	Pezizales	1	Pezizaceae	1	Chromelosporium	1	Chromelosporium sp	SH216391.06FU	1
KU683796	AK1689	ARIZ:AK1689	4	4	AKE	C1	Betula nana	Angiospermae	Betulaceae	LLF	Sordariomycetes (Xylariales)	Fungi	1	Ascomycota	1	Sordariomycetes	1	Xylariales	1	Xylariaceae	1	NA	NA	NA	SH224035.06FU	1
KX909055	AK1690	ARIZ:AK1690	30	48	AKE	C1	Betula nana	Angiospermae	Betulaceae	LLF	Pezizomycetes (Pezizales)	Fungi	1	Ascomycota	1	Pezizomycetes	1	Pezizales	1	Pyronemataceae	1	Geopyxis	1	Geopyxis sp	SH229656.06FU	1
KU683797	AK1691	ARIZ:AK1691	5	6	AKE	C1	Betula nana	Angiospermae	Betulaceae	LLF	Sordariomycetes (Xylariales)	Fungi	1	Ascomycota	1	Sordariomycetes	1	Xylariales	1	Xylariaceae	1	NA	NA	NA	SH224035.06FU	1
KX909056	AK1692	ARIZ:AK1692	14	16	AKE	C1	Betula nana	Angiospermae	Betulaceae	LLF	Sordariomycetes (N/A)	Fungi	1	Ascomycota	1	Sordariomycetes	1	NA	NA	NA	NA	NA	NA	NA	SH234917.06FU	0.99
KX909057	AK1693	ARIZ:AK1693	21	30	AKE	C1	Betula nana	Angiospermae	Betulaceae	LLF	Pezizomycetes (Pezizales)	Fungi	1	Ascomycota	1	Pezizomycetes	1	Pezizales	1	Pyronemataceae	1	Geopyxis	1	Geopyxis sp	SH229656.06FU	1
KX909058	AK1694	ARIZ:AK1694	65	182	AKE	C1	Betula nana	Angiospermae	Betulaceae	LLF	Eurotiomycetes (Eurotiales)	Fungi	1	Ascomycota	1	Eurotiomycetes	1	Eurotiales	1	Trichocomaceae	1	Talaromyces	0.9	Talaromyces flavus	SH225870.06FU	0.9
KX909059	AK1695	ARIZ:AK1695	26	41	AKE	C1	Betula nana	Angiospermae	Betulaceae	LLF	Pezizomycetes (Pezizales)	Fungi	1	Ascomycota	1	Pezizomycetes	1	Pezizales	1	Pyronemataceae	1	Geopyxis	1	Geopyxis sp	SH229656.06FU	1
KU683798	AK1696	ARIZ:AK1696	10	11	AKE	C1	Betula nana	Angiospermae	Betulaceae	LLF	Sordariomycetes (Xylariales)	Fungi	1	Ascomycota	1	Sordariomycetes	1	Xylariales	1	Xylariaceae	1	NA	NA	NA	SH224035.06FU	1
KU683799	AK1697	ARIZ:AK1697	2	2	AKE	C1	Betula nana	Angiospermae	Betulaceae	LLF	Sordariomycetes (Xylariales)	Fungi	1	Ascomycota	1	Sordariomycetes	1	Xylariales	1	Xylariaceae	1	NA	NA	NA	SH224035.06FU	1
KX909060	AK1698	ARIZ:AK1698	3	3	AKE	C1	Betula nana	Angiospermae	Betulaceae	LLF	Sordariomycetes (Coniochaetales)	Fungi	1	Ascomycota	1	Sordariomycetes	1	Coniochaetales	1	Coniochaetaceae	1	Lecythophora	1	Lecythophora hoffmannii	SH226439.06FU	1
KX909061	AK1699	ARIZ:AK1699	12	13	AKE	C1	Betula nana	Angiospermae	Betulaceae	LLF	Sordariomycetes (Xylariales)	Fungi	1	Ascomycota	1	Sordariomycetes	1	Xylariales	1	Xylariaceae	1	NA	NA	NA	SH224035.06FU	1
KX909094	AK1700	ARIZ:AK1700	21	30	AKE	C1	Picea glauca	Pinophyta	Pinaceae	LLF	Pezizomycetes (Pezizales)	Fungi	1	Ascomycota	1	Pezizomycetes	1	Pezizales	1	Pyronemataceae	1	Geopyxis	1	Geopyxis sp	SH229656.06FU	1
KX909095	AK1701	ARIZ:AK1701	37	62	AKE	C1	Picea glauca	Pinophyta	Pinaceae	LLF	Leotiomycetes (Helotiales)	Fungi	1	Ascomycota	1	Leotiomycetes	0.97	Helotiales	0.96	Vibrisseaceae	0.8	NA	NA	NA	SH240201.06FU	0.8
KX909096	AK1702	ARIZ:AK1702	39	183	AKE	C1	Picea glauca	Pinophyta	Pinaceae	LLF	N/A	Fungi	1	NA	NA	NA	NA	NA	NA	NA	NA	NA	NA	NA	SH230875.06FU	0.9
KX909097	AK1703	ARIZ:AK1703	41	178	AKE	C1	Picea glauca	Pinophyta	Pinaceae	LLF	Dothideomycetes (N/A)	Fungi	1	Ascomycota	1	Dothideomycetes	1	Dothideales	1	Dothioraceae	1	NA	NA	NA	NA	NA
KX909098	AK1704	ARIZ:AK1704	66	184	AKE	C1	Picea glauca	Pinophyta	Pinaceae	LLF	N/A	Fungi	1	Ascomycota	1	Leotiomycetes	0.97	NA	NA	NA	NA	NA	NA	NA	SH208867.06FU	1
KX909099	AK1706	ARIZ:AK1706	67	185	AKE	C1	Picea glauca	Pinophyta	Pinaceae	LLF	N/A	Fungi	1	Ascomycota	1	NA	NA	NA	NA	NA	NA	NA	NA	NA	NA	NA
KU683800	AK1708	ARIZ:AK1708	2	2	AKE	C1	Picea glauca	Pinophyta	Pinaceae	LLF	Sordariomycetes (Xylariales)	Fungi	1	Ascomycota	1	Sordariomycetes	1	Xylariales	1	Xylariaceae	1	NA	NA	NA	SH224035.06FU	1
KX909100	AK1709	ARIZ:AK1709	66	184	AKE	C1	Picea glauca	Pinophyta	Pinaceae	LLF	Leotiomycetes (N/A)	Fungi	1	Ascomycota	1	Leotiomycetes	0.97	NA	NA	NA	NA	NA	NA	NA	NA	NA
KX909101	AK1710	ARIZ:AK1710	23	186	AKE	C1	Picea glauca	Pinophyta	Pinaceae	LLF	Pezizomycetes (Pezizales)	Fungi	1	Ascomycota	1	Pezizomycetes	1	Pezizales	1	Pezizaceae	1	Peziza	1	Peziza sp	SH217067.06FU	1
KX909102	AK1711	ARIZ:AK1711	68	187	AKE	C1	Picea glauca	Pinophyta	Pinaceae	LLF	Leotiomycetes (Helotiales)	Fungi	1	Ascomycota	1	Leotiomycetes	1	Helotiales	1	NA	NA	NA	NA	NA	SH208247.06FU	1
KX909103	AK1712	ARIZ:AK1712	66	184	AKE	C1	Picea glauca	Pinophyta	Pinaceae	LLF	Leotiomycetes (N/A)	Fungi	1	Ascomycota	1	Leotiomycetes	1	NA	NA	NA	NA	NA	NA	NA	NA	NA
KX909159	AK1713	ARIZ:AK1713	69	188	AKE	C2	Salix pulchra	Angiospermae	Salicaceae	LLF	N/A	Fungi	1	Ascomycota	0.95	Dothideomycetes	0.94	NA	NA	NA	NA	NA	NA	NA	NA	NA
KU683801	AK1714	ARIZ:AK1714	10	11	AKE	C2	Salix pulchra	Angiospermae	Salicaceae	LLF	Sordariomycetes (Xylariales)	Fungi	1	Ascomycota	1	Sordariomycetes	1	Xylariales	1	Xylariaceae	1	NA	NA	NA	SH224035.06FU	1
KX909160	AK1715	ARIZ:AK1715	1	1	AKE	C2	Salix pulchra	Angiospermae	Salicaceae	LLF	Sordariomycetes (Xylariales)	Fungi	1	Ascomycota	1	Sordariomycetes	1	Xylariales	1	Xylariaceae	1	NA	NA	NA	SH224035.06FU	1
KU683802	AK1716	ARIZ:AK1716	10	11	AKE	C2	Betula nana	Angiospermae	Betulaceae	LLF	Sordariomycetes (Xylariales)	Fungi	1	Ascomycota	1	Sordariomycetes	1	Xylariales	1	Xylariaceae	1	NA	NA	NA	SH224035.06FU	1
KU683803	AK1717	ARIZ:AK1717	2	2	AKE	C2	Betula nana	Angiospermae	Betulaceae	LLF	Sordariomycetes (Xylariales)	Fungi	1	Ascomycota	1	Sordariomycetes	1	Xylariales	1	Xylariaceae	1	NA	NA	NA	SH224035.06FU	1
KX909062	AK1718	ARIZ:AK1718	70	189	AKE	C2	Betula nana	Angiospermae	Betulaceae	LLF	Pezizomycetes (Pezizales)	Fungi	1	Ascomycota	1	Pezizomycetes	1	Pezizales	1	Pyronemataceae	1	Pyronema	1	Pyronema sp MAB 2010a	SH224316.06FU	1
KX909063	AK1719	ARIZ:AK1719	1	1	AKE	C2	Betula nana	Angiospermae	Betulaceae	LLF	Sordariomycetes (Xylariales)	Fungi	1	Ascomycota	1	Sordariomycetes	1	Xylariales	1	Xylariaceae	1	NA	NA	NA	SH224035.06FU	1
KU683804	AK1720	ARIZ:AK1720	10	11	AKE	C2	Betula nana	Angiospermae	Betulaceae	LLF	Sordariomycetes (Xylariales)	Fungi	1	Ascomycota	1	Sordariomycetes	1	Xylariales	1	Xylariaceae	1	NA	NA	NA	SH224035.06FU	1
KX909064	AK1721	ARIZ:AK1721	1	1	AKE	C2	Betula nana	Angiospermae	Betulaceae	LLF	Sordariomycetes (Xylariales)	Fungi	1	Ascomycota	1	Sordariomycetes	1	Xylariales	1	Xylariaceae	1	NA	NA	NA	SH224035.06FU	1
KX909104	AK1723	ARIZ:AK1723	18	54	AKE	C2	Picea glauca	Pinophyta	Pinaceae	LLF	Sordariomycetes (Coniochaetales)	Fungi	1	Ascomycota	1	Sordariomycetes	1	Coniochaetales	0.97	Coniochaetaceae	0.97	Lecythophora	0.97	Lecythophora hoffmannii	SH226439.06FU	0.97
KX909105	AK1724	ARIZ:AK1724	7	8	AKE	C2	Picea glauca	Pinophyta	Pinaceae	LLF	Sordariomycetes (N/A)	Fungi	1	Ascomycota	1	Sordariomycetes	1	NA	NA	NA	NA	NA	NA	NA	SH234917.06FU	0.98
KX909106	AK1726	ARIZ:AK1726	6	190	AKE	C2	Picea glauca	Pinophyta	Pinaceae	LLF	Sordariomycetes (N/A)	Fungi	1	Ascomycota	1	Sordariomycetes	1	Coniochaetales	1	Coniochaetaceae	1	Lecythophora	1	Lecythophora hoffmannii	SH226439.06FU	1
KX909107	AK1727	ARIZ:AK1727	19	47	AKE	C2	Picea glauca	Pinophyta	Pinaceae	LLF	Leotiomycetes (N/A)	Fungi	1	Ascomycota	1	Leotiomycetes	1	Helotiales	1	Dermateaceae	1	NA	NA	NA	SH216812.06FU	1
KU683805	AK1728	ARIZ:AK1728	52	172	AKE	C2	Picea glauca	Pinophyta	Pinaceae	LLF	Sordariomycetes (Xylariales)	Fungi	1	Ascomycota	1	Sordariomycetes	1	Xylariales	1	Xylariaceae	1	Nemania	1	Nemania sp	SH241717.06FU	1
KU683806	AK1729	ARIZ:AK1729	4	4	AKE	C2	Picea glauca	Pinophyta	Pinaceae	LLF	Sordariomycetes (Xylariales)	Fungi	1	Ascomycota	1	Sordariomycetes	1	Xylariales	1	Xylariaceae	1	NA	NA	NA	SH224035.06FU	1
KX909108	AK1730	ARIZ:AK1730	14	16	AKE	C2	Picea glauca	Pinophyta	Pinaceae	LLF	Sordariomycetes (N/A)	Fungi	1	Ascomycota	1	Sordariomycetes	1	NA	NA	NA	NA	NA	NA	NA	SH234917.06FU	0.98
KX909109	AK1731	ARIZ:AK1731	21	30	AKE	C2	Picea glauca	Pinophyta	Pinaceae	LLF	Pezizomycetes (Pezizales)	Fungi	1	Ascomycota	1	Pezizomycetes	1	Pezizales	1	Pyronemataceae	1	Geopyxis	1	Geopyxis sp	SH229656.06FU	1
KU683807	AK1732	ARIZ:AK1732	10	11	AKE	C2	Picea glauca	Pinophyta	Pinaceae	LLF	Sordariomycetes (Xylariales)	Fungi	1	Ascomycota	1	Sordariomycetes	1	Xylariales	1	Xylariaceae	1	NA	NA	NA	SH224035.06FU	1
KU683808	AK1733	ARIZ:AK1733	10	11	AKE	C2	Picea glauca	Pinophyta	Pinaceae	LLF	Sordariomycetes (Xylariales)	Fungi	1	Ascomycota	1	Sordariomycetes	1	Xylariales	1	Xylariaceae	1	NA	NA	NA	SH224035.06FU	1
KU683809	AK1734	ARIZ:AK1734	10	11	AKE	C2	Picea glauca	Pinophyta	Pinaceae	LLF	Sordariomycetes (Xylariales)	Fungi	1	Ascomycota	1	Sordariomycetes	1	Xylariales	1	Xylariaceae	1	NA	NA	NA	SH224035.06FU	1
KX909110	AK1735	ARIZ:AK1735	30	48	AKE	C2	Picea glauca	Pinophyta	Pinaceae	LLF	Pezizomycetes (Pezizales)	Fungi	1	Ascomycota	1	Pezizomycetes	1	Pezizales	1	Pyronemataceae	1	Geopyxis	1	Geopyxis sp	SH229656.06FU	1
KX909111	AK1736	ARIZ:AK1736	12	13	AKE	C2	Picea glauca	Pinophyta	Pinaceae	LLF	Sordariomycetes (Xylariales)	Fungi	1	Ascomycota	1	Sordariomycetes	1	Xylariales	1	Xylariaceae	1	NA	NA	NA	SH224035.06FU	1
KU683810	AK1737	ARIZ:AK1737	10	11	AKE	C2	Picea glauca	Pinophyta	Pinaceae	LLF	Sordariomycetes (Xylariales)	Fungi	1	Ascomycota	1	Sordariomycetes	1	Xylariales	1	Xylariaceae	1	NA	NA	NA	SH224035.06FU	1
KX909112	AK1738	ARIZ:AK1738	1	1	AKE	C2	Picea glauca	Pinophyta	Pinaceae	LLF	Sordariomycetes (Xylariales)	Fungi	1	Ascomycota	1	Sordariomycetes	1	Xylariales	1	Xylariaceae	1	NA	NA	NA	SH224035.06FU	1
KX909113	AK1740	ARIZ:AK1740	26	41	AKE	C2	Picea glauca	Pinophyta	Pinaceae	LLF	Pezizomycetes (Pezizales)	Fungi	1	Ascomycota	1	Pezizomycetes	1	Pezizales	1	Pyronemataceae	1	Geopyxis	1	Geopyxis sp	SH229656.06FU	1
KX909114	AK1742	ARIZ:AK1742	6	190	AKE	C2	Picea glauca	Pinophyta	Pinaceae	LLF	Sordariomycetes (N/A)	Fungi	1	Ascomycota	1	Sordariomycetes	1	Coniochaetales	1	Coniochaetaceae	1	Lecythophora	1	Lecythophora hoffmannii	SH226439.06FU	1
KX909161	AK1744	ARIZ:AK1744	6	88	AKE	C3	Salix pulchra	Angiospermae	Salicaceae	LLF	Sordariomycetes (Coniochaetales)	Fungi	1	Ascomycota	1	Sordariomycetes	1	Coniochaetales	1	Coniochaetaceae	1	Lecythophora	1	Lecythophora hoffmannii	SH226439.06FU	1
KX909162	AK1745	ARIZ:AK1745	1	1	AKE	C3	Salix pulchra	Angiospermae	Salicaceae	LLF	Sordariomycetes (Xylariales)	Fungi	1	Ascomycota	1	Sordariomycetes	1	Xylariales	1	Xylariaceae	1	NA	NA	NA	SH224035.06FU	1
KU683811	AK1748	ARIZ:AK1748	10	11	AKE	C3	Betula nana	Angiospermae	Betulaceae	LLF	Sordariomycetes (Xylariales)	Fungi	1	Ascomycota	1	Sordariomycetes	1	Xylariales	1	Xylariaceae	1	NA	NA	NA	SH224035.06FU	1
KU683812	AK1749	ARIZ:AK1749	10	11	AKE	C3	Betula nana	Angiospermae	Betulaceae	LLF	Sordariomycetes (Xylariales)	Fungi	1	Ascomycota	1	Sordariomycetes	1	Xylariales	1	Xylariaceae	1	NA	NA	NA	SH224035.06FU	1
KU683813	AK1750	ARIZ:AK1750	5	6	AKE	C3	Betula nana	Angiospermae	Betulaceae	LLF	Sordariomycetes (Xylariales)	Fungi	1	Ascomycota	1	Sordariomycetes	1	Xylariales	1	Xylariaceae	1	NA	NA	NA	SH224035.06FU	1
KU683814	AK1751	ARIZ:AK1751	11	12	AKE	C3	Betula nana	Angiospermae	Betulaceae	LLF	Sordariomycetes (Xylariales)	Fungi	1	Ascomycota	1	Sordariomycetes	1	Xylariales	1	Xylariaceae	1	Daldinia	1	Daldinia sp	SH224035.06FU	1
KX909115	AK1753	ARIZ:AK1753	68	187	AKE	C3	Picea glauca	Pinophyta	Pinaceae	LLF	Leotiomycetes (Helotiales)	Fungi	1	Ascomycota	1	Leotiomycetes	1	Helotiales	1	NA	NA	NA	NA	NA	SH208247.06FU	1
KX909116	AK1754	ARIZ:AK1754	71	191	AKE	C3	Picea glauca	Pinophyta	Pinaceae	LLF	Sordariomycetes (N/A)	Fungi	1	Ascomycota	1	Sordariomycetes	1	Incertae sedis 7	1	Apiosporaceae	1	Arthrinium	1	Arthrinium malaysianum	SH233379.06FU	0.92
KX909117	AK1755	ARIZ:AK1755	68	187	AKE	C3	Picea glauca	Pinophyta	Pinaceae	LLF	Leotiomycetes (Helotiales)	Fungi	1	Ascomycota	1	Leotiomycetes	1	Helotiales	1	NA	NA	NA	NA	NA	SH208247.06FU	1
KX909118	AK1756	ARIZ:AK1756	72	192	AKE	C3	Picea glauca	Pinophyta	Pinaceae	LLF	Leotiomycetes (Helotiales)	Fungi	1	Ascomycota	1	Leotiomycetes	0.97	Helotiales	0.97	Hyaloscyphaceae	1	Lachnum	0.97	Lachnum pulverulentum	SH189780.06FU	0.97
KX909119	AK1757	ARIZ:AK1757	73	193	AKE	C3	Picea glauca	Pinophyta	Pinaceae	LLF	Leotiomycetes (Helotiales)	Fungi	1	Ascomycota	1	Leotiomycetes	1	Helotiales	1	NA	NA	NA	NA	NA	NA	NA
KX909120	AK1758	ARIZ:AK1758	74	194	AKE	C3	Picea glauca	Pinophyta	Pinaceae	LLF	Sordariomycetes (N/A)	Fungi	1	Ascomycota	1	Sordariomycetes	0.94	NA	NA	NA	NA	NA	NA	NA	NA	NA
KX909121	AK1759	ARIZ:AK1759	12	13	AKE	C3	Picea glauca	Pinophyta	Pinaceae	LLF	Sordariomycetes (Xylariales)	Fungi	1	Ascomycota	1	Sordariomycetes	1	Xylariales	1	Xylariaceae	1	NA	NA	NA	SH224035.06FU	1
KX909122	AK1761	ARIZ:AK1761	21	30	AKE	C3	Picea glauca	Pinophyta	Pinaceae	LLF	Pezizomycetes (Pezizales)	Fungi	1	Ascomycota	1	Pezizomycetes	1	Pezizales	1	Pyronemataceae	1	Geopyxis	1	Geopyxis sp	SH229656.06FU	1
KX909123	AK1762	ARIZ:AK1762	53	195	AKE	C3	Picea glauca	Pinophyta	Pinaceae	LLF	Leotiomycetes (Helotiales)	Fungi	1	Ascomycota	1	Leotiomycetes	1	Helotiales	1	NA	NA	NA	NA	NA	SH209354.06FU	1
KX909124	AK1763	ARIZ:AK1763	6	32	AKE	C3	Picea glauca	Pinophyta	Pinaceae	LLF	Sordariomycetes (Coniochaetales)	Fungi	1	Ascomycota	1	Sordariomycetes	1	Coniochaetales	1	Coniochaetaceae	1	Lecythophora	1	Lecythophora hoffmannii	SH226439.06FU	1
KU683815	AK1764	ARIZ:AK1764	2	2	AKE	C3	Picea glauca	Pinophyta	Pinaceae	LLF	Sordariomycetes (Xylariales)	Fungi	1	Ascomycota	1	Sordariomycetes	1	Xylariales	1	Xylariaceae	1	NA	NA	NA	SH224035.06FU	1
KX909125	AK1765	ARIZ:AK1765	72	192	AKE	C3	Picea glauca	Pinophyta	Pinaceae	LLF	Leotiomycetes (Helotiales)	Fungi	1	Ascomycota	1	Leotiomycetes	0.95	Helotiales	0.95	Hyaloscyphaceae	1	Lachnum	0.97	Lachnum pulverulentum	SH189780.06FU	0.97
KX909126	AK1766	ARIZ:AK1766	21	30	AKE	C3	Picea glauca	Pinophyta	Pinaceae	LLF	Pezizomycetes (Pezizales)	Fungi	1	Ascomycota	1	Pezizomycetes	1	Pezizales	1	Pyronemataceae	1	Geopyxis	1	Geopyxis sp	SH229656.06FU	1
KX909127	AK1767	ARIZ:AK1767	66	184	AKE	C3	Picea glauca	Pinophyta	Pinaceae	LLF	Leotiomycetes (N/A)	Fungi	1	Ascomycota	1	Leotiomycetes	1	NA	NA	NA	NA	NA	NA	NA	NA	NA
KX909128	AK1768	ARIZ:AK1768	73	193	AKE	C3	Picea glauca	Pinophyta	Pinaceae	LLF	Leotiomycetes (Helotiales)	Fungi	1	Ascomycota	1	Leotiomycetes	1	Helotiales	1	NA	NA	NA	NA	NA	NA	NA
KX909129	AK1769	ARIZ:AK1769	73	193	AKE	C3	Picea glauca	Pinophyta	Pinaceae	LLF	Leotiomycetes (Helotiales)	Fungi	1	Ascomycota	1	Leotiomycetes	0.98	Helotiales	0.98	NA	NA	NA	NA	NA	NA	NA
KX909130	AK1770	ARIZ:AK1770	66	184	AKE	C3	Picea glauca	Pinophyta	Pinaceae	LLF	Leotiomycetes (N/A)	Fungi	1	Ascomycota	1	Leotiomycetes	1	NA	NA	NA	NA	NA	NA	NA	NA	NA
KU683816	AK1772	ARIZ:AK1772	4	4	AKE	C3	Picea glauca	Pinophyta	Pinaceae	LLF	Sordariomycetes (Xylariales)	Fungi	1	Ascomycota	1	Sordariomycetes	1	Xylariales	1	Xylariaceae	1	NA	NA	NA	SH224035.06FU	1
KX909131	AK1773	ARIZ:AK1773	53	195	AKE	C3	Picea glauca	Pinophyta	Pinaceae	LLF	Leotiomycetes (Helotiales)	Fungi	1	Ascomycota	0.99	Leotiomycetes	0.99	Helotiales	0.99	NA	NA	NA	NA	NA	SH209354.06FU	0.99
KX909132	AK1774	ARIZ:AK1774	42	68	AKE	C3	Picea glauca	Pinophyta	Pinaceae	LLF	Leotiomycetes (Helotiales)	Fungi	1	Ascomycota	1	Leotiomycetes	1	Helotiales	1	Incertae sedis 2	1	Darkera	1	Darkera sp	SH222480.06FU	1
KX909133	AK1775	ARIZ:AK1775	73	193	AKE	C3	Picea glauca	Pinophyta	Pinaceae	LLF	Leotiomycetes (Helotiales)	Fungi	1	Ascomycota	1	Leotiomycetes	0.97	Helotiales	0.97	NA	NA	NA	NA	NA	NA	NA
KX909134	AK1776	ARIZ:AK1776	75	196	AKE	C3	Picea glauca	Pinophyta	Pinaceae	LLF	Dothideomycetes (N/A)	Fungi	1	Ascomycota	0.8	Dothideomycetes	0.8	NA	NA	NA	NA	NA	NA	NA	NA	NA
KX909135	AK1777	ARIZ:AK1777	73	193	AKE	C3	Picea glauca	Pinophyta	Pinaceae	LLF	Leotiomycetes (Helotiales)	Fungi	1	Ascomycota	1	Leotiomycetes	0.95	Helotiales	0.95	NA	NA	NA	NA	NA	NA	NA
KX909136	AK1778	ARIZ:AK1778	68	187	AKE	C3	Picea glauca	Pinophyta	Pinaceae	LLF	Leotiomycetes (Helotiales)	Fungi	1	Ascomycota	1	Leotiomycetes	1	Helotiales	1	NA	NA	NA	NA	NA	SH208247.06FU	1
KX909137	AK1779	ARIZ:AK1779	73	193	AKE	C3	Picea glauca	Pinophyta	Pinaceae	LLF	Leotiomycetes (Helotiales)	Fungi	1	Ascomycota	1	Leotiomycetes	0.96	Helotiales	0.95	NA	NA	NA	NA	NA	NA	NA
KU683817	AK1780	ARIZ:AK1780	10	11	AKE	C3	Picea glauca	Pinophyta	Pinaceae	LLF	Sordariomycetes (Xylariales)	Fungi	1	Ascomycota	1	Sordariomycetes	1	Xylariales	1	Xylariaceae	1	NA	NA	NA	SH224035.06FU	1
KX909138	AK1781	ARIZ:AK1781	68	197	AKE	C3	Picea glauca	Pinophyta	Pinaceae	LLF	N/A	Fungi	1	Ascomycota	1	Leotiomycetes	1	Helotiales	1	NA	NA	NA	NA	NA	NA	NA
KX909139	AK1782	ARIZ:AK1782	75	196	AKE	C3	Picea glauca	Pinophyta	Pinaceae	LLF	N/A	Fungi	1	Ascomycota	0.73	Dothideomycetes	0.8	NA	NA	NA	NA	NA	NA	NA	NA	NA
KU683818	AK1783	ARIZ:AK1783	4	4	AKE	C3	Picea glauca	Pinophyta	Pinaceae	LLF	Sordariomycetes (Xylariales)	Fungi	1	Ascomycota	1	Sordariomycetes	1	Xylariales	1	Xylariaceae	1	NA	NA	NA	SH224035.06FU	1
KX909140	AK1786	ARIZ:AK1786	66	184	AKE	C3	Picea glauca	Pinophyta	Pinaceae	LLF	Leotiomycetes (N/A)	Fungi	1	Ascomycota	1	Leotiomycetes	1	NA	NA	NA	NA	NA	NA	NA	NA	NA
KU683819	AK1789	ARIZ:AK1789	5	6	AKE	C3	Picea glauca	Pinophyta	Pinaceae	LLF	Sordariomycetes (Xylariales)	Fungi	1	Ascomycota	1	Sordariomycetes	1	Xylariales	1	Xylariaceae	1	NA	NA	NA	SH224035.06FU	1
KX909141	AK1790	ARIZ:AK1790	1	1	AKE	C3	Picea glauca	Pinophyta	Pinaceae	LLF	Sordariomycetes (Xylariales)	Fungi	1	Ascomycota	1	Sordariomycetes	1	Xylariales	1	Xylariaceae	1	NA	NA	NA	SH224035.06FU	1
KX909142	AK1791	ARIZ:AK1791	72	192	AKE	C3	Picea glauca	Pinophyta	Pinaceae	LLF	Leotiomycetes (Helotiales)	Fungi	1	Ascomycota	1	Leotiomycetes	1	Helotiales	1	Hyaloscyphaceae	1	Lachnum	0.97	Lachnum pulverulentum	SH189780.06FU	0.97
KX909143	AK1792	ARIZ:AK1792	72	192	AKE	C3	Picea glauca	Pinophyta	Pinaceae	LLF	Leotiomycetes (Helotiales)	Fungi	1	Ascomycota	1	Leotiomycetes	1	Helotiales	1	Hyaloscyphaceae	1	Lachnum	0.97	Lachnum pulverulentum	SH189780.06FU	0.97
KX909144	AK1794	ARIZ:AK1794	73	193	AKE	C3	Picea glauca	Pinophyta	Pinaceae	LLF	Leotiomycetes (Helotiales)	Fungi	1	Ascomycota	1	Leotiomycetes	1	Helotiales	1	NA	NA	NA	NA	NA	NA	NA
KX909163	AK1795	ARIZ:AK1795	56	161	AKN	C1	Betula nana	Angiospermae	Betulaceae	DLF	Leotiomycetes (N/A)	Fungi	1	Ascomycota	1	Leotiomycetes	1	NA	NA	NA	NA	NA	NA	NA	NA	NA
KX909165	AK1797	ARIZ:AK1797	49	198	AKN	C1	Picea glauca	Pinophyta	Pinaceae	DLF	Leotiomycetes (Rhytismatales)	Fungi	1	Ascomycota	1	Leotiomycetes	1	Rhytismatales	1	Rhytismataceae	1	NA	NA	NA	SH196477.06FU	1
KX909166	AK1798	ARIZ:AK1798	76	199	AKN	C1	Picea glauca	Pinophyta	Pinaceae	DLF	Sordariomycetes (N/A)	Fungi	1	Ascomycota	1	Sordariomycetes	1	Incertae sedis 7	1	Incertae sedis 31	1	Eucasphaeria	1	Eucasphaeria capensis	SH230370.06FU	1
KX909167	AK1799	ARIZ:AK1799	77	200	AKN	C1	Picea glauca	Pinophyta	Pinaceae	DLF	N/A	Fungi	1	Ascomycota	1	Leotiomycetes	1	NA	NA	NA	NA	NA	NA	NA	NA	NA
KX909168	AK1800	ARIZ:AK1800	78	201	AKN	C1	Picea glauca	Pinophyta	Pinaceae	DLF	N/A	Fungi	1	NA	NA	NA	NA	NA	NA	NA	NA	NA	NA	NA	NA	NA
KX909169	AK1801	ARIZ:AK1801	79	202	AKN	C1	Picea glauca	Pinophyta	Pinaceae	DLF	Leotiomycetes (Rhytismatales)	Fungi	1	Ascomycota	1	Leotiomycetes	1	Rhytismatales	0.97	Rhytismataceae	0.97	NA	NA	NA	SH196477.06FU	0.97
KX909170	AK1803	ARIZ:AK1803	49	198	AKN	C1	Picea glauca	Pinophyta	Pinaceae	DLF	Leotiomycetes (Rhytismatales)	Fungi	1	Ascomycota	1	Leotiomycetes	1	Rhytismatales	1	Rhytismataceae	1	NA	NA	NA	SH196477.06FU	1
KX909171	AK1804	ARIZ:AK1804	41	203	AKN	C1	Picea glauca	Pinophyta	Pinaceae	DLF	Dothideomycetes (Dothideales)	Fungi	1	Ascomycota	1	Dothideomycetes	1	Dothideales	1	Dothioraceae	1	NA	NA	NA	SH231446.06FU	1
KX909172	AK1805	ARIZ:AK1805	76	199	AKN	C1	Picea glauca	Pinophyta	Pinaceae	DLF	Sordariomycetes (N/A)	Fungi	1	Ascomycota	1	Sordariomycetes	1	Incertae sedis 7	0.98	Incertae sedis 31	0.98	Eucasphaeria	0.98	Eucasphaeria capensis	SH230370.06FU	0.98
KX909173	AK1806	ARIZ:AK1806	49	138	AKN	C1	Picea glauca	Pinophyta	Pinaceae	DLF	Leotiomycetes (Rhytismatales)	Fungi	1	Ascomycota	1	Leotiomycetes	1	Rhytismatales	1	Rhytismataceae	1	NA	NA	NA	SH196477.06FU	1
KX909174	AK1807	ARIZ:AK1807	80	204	AKN	C1	Picea glauca	Pinophyta	Pinaceae	DLF	Dothideomycetes (N/A)	Fungi	1	Ascomycota	1	Dothideomycetes	1	Pleosporales	1	Venturiaceae 1	1	Rhizosphaera	1	Rhizosphaera oudemansii	SH231449.06FU	1
KX909175	AK1808	ARIZ:AK1808	68	205	AKN	C1	Picea glauca	Pinophyta	Pinaceae	DLF	N/A	Fungi	1	Ascomycota	1	Leotiomycetes	1	Helotiales	1	NA	NA	NA	NA	NA	NA	NA
KX909176	AK1809	ARIZ:AK1809	50	206	AKN	C1	Picea glauca	Pinophyta	Pinaceae	DLF	Leotiomycetes (Rhytismatales)	Fungi	1	Ascomycota	1	Leotiomycetes	1	Rhytismatales	1	Rhytismataceae	1	NA	NA	NA	SH196477.06FU	1
KX909177	AK1810	ARIZ:AK1810	76	199	AKN	C1	Picea glauca	Pinophyta	Pinaceae	DLF	Sordariomycetes (N/A)	Fungi	1	Ascomycota	1	Sordariomycetes	1	Incertae sedis 7	0.98	Incertae sedis 31	0.98	Eucasphaeria	0.98	Eucasphaeria capensis	SH230370.06FU	0.98
KX909178	AK1811	ARIZ:AK1811	81	207	AKN	C1	Picea glauca	Pinophyta	Pinaceae	DLF	Leotiomycetes (Helotiales)	Fungi	1	Ascomycota	0.99	Leotiomycetes	0.97	Helotiales	0.93	Helotiales unidentified	0.81	Helotiales unidentified 1	0.81	NA	NA	NA
KX909179	AK1812	ARIZ:AK1812	82	208	AKN	C1	Picea glauca	Pinophyta	Pinaceae	DLF	Dothideomycetes (N/A)	Fungi	1	Ascomycota	1	Dothideomycetes	0.99	Pleosporales	1	NA	NA	NA	NA	NA	NA	NA
KX909180	AK1814	ARIZ:AK1814	51	209	AKN	C1	Picea glauca	Pinophyta	Pinaceae	DLF	Leotiomycetes (Rhytismatales)	Fungi	1	Ascomycota	1	Leotiomycetes	1	Rhytismatales	1	Rhytismataceae	1	NA	NA	NA	SH196477.06FU	1
KX909181	AK1815	ARIZ:AK1815	49	198	AKN	C1	Picea glauca	Pinophyta	Pinaceae	DLF	Leotiomycetes (Rhytismatales)	Fungi	1	Ascomycota	1	Leotiomycetes	1	Rhytismatales	1	Rhytismataceae	1	NA	NA	NA	SH196477.06FU	1
KX909182	AK1816	ARIZ:AK1816	76	199	AKN	C1	Picea glauca	Pinophyta	Pinaceae	DLF	Sordariomycetes (N/A)	Fungi	1	Ascomycota	1	Sordariomycetes	1	Incertae sedis 7	0.97	Incertae sedis 31	0.97	Eucasphaeria	0.97	Eucasphaeria capensis	SH230370.06FU	0.97
KX909183	AK1817	ARIZ:AK1817	76	199	AKN	C1	Picea glauca	Pinophyta	Pinaceae	DLF	Sordariomycetes (N/A)	Fungi	1	Ascomycota	1	Sordariomycetes	1	Incertae sedis 7	0.98	Incertae sedis 31	0.98	Eucasphaeria	0.98	Eucasphaeria capensis	SH230370.06FU	0.98
KX909184	AK1818	ARIZ:AK1818	77	200	AKN	C1	Picea glauca	Pinophyta	Pinaceae	DLF	Leotiomycetes (N/A)	Fungi	1	Ascomycota	1	Leotiomycetes	1	NA	NA	NA	NA	NA	NA	NA	SH196488.06FU	0.92
KX909185	AK1819	ARIZ:AK1819	79	210	AKN	C1	Picea glauca	Pinophyta	Pinaceae	DLF	Leotiomycetes (Rhytismatales)	Fungi	1	Ascomycota	1	Leotiomycetes	1	Rhytismatales	0.98	Rhytismataceae	0.98	NA	NA	NA	SH196477.06FU	0.98
KX909186	AK1820	ARIZ:AK1820	49	198	AKN	C1	Picea glauca	Pinophyta	Pinaceae	DLF	Leotiomycetes (Rhytismatales)	Fungi	1	Ascomycota	1	Leotiomycetes	1	Rhytismatales	1	Rhytismataceae	1	NA	NA	NA	SH196477.06FU	1
KX909187	AK1821	ARIZ:AK1821	83	211	AKN	C1	Picea glauca	Pinophyta	Pinaceae	DLF	N/A	Fungi	1	Fungi unidentified	0.74	NA	NA	NA	NA	NA	NA	NA	NA	NA	NA	NA
KX909188	AK1822	ARIZ:AK1822	51	126	AKN	C1	Picea glauca	Pinophyta	Pinaceae	DLF	Leotiomycetes (Rhytismatales)	Fungi	1	Ascomycota	1	Leotiomycetes	1	Rhytismatales	1	Rhytismataceae	1	NA	NA	NA	SH196477.06FU	1
KX909189	AK1823	ARIZ:AK1823	76	199	AKN	C1	Picea glauca	Pinophyta	Pinaceae	DLF	Sordariomycetes (N/A)	Fungi	1	Ascomycota	1	Sordariomycetes	1	Incertae sedis 7	0.99	Incertae sedis 31	0.99	Eucasphaeria	0.99	Eucasphaeria capensis	SH230370.06FU	0.99
KX909190	AK1824	ARIZ:AK1824	84	212	AKN	C1	Picea glauca	Pinophyta	Pinaceae	DLF	Dothideomycetes (Pleosporales)	Fungi	1	Ascomycota	0.94	Dothideomycetes	0.93	Pleosporales	0.87	Mytilinidiaceae	0.87	Lophium	0.87	Lophium mytilinum	SH224769.06FU	0.87
KX909191	AK1825	ARIZ:AK1825	51	126	AKN	C1	Picea glauca	Pinophyta	Pinaceae	DLF	Leotiomycetes (Rhytismatales)	Fungi	1	Ascomycota	1	Leotiomycetes	1	Rhytismatales	1	Rhytismataceae	1	NA	NA	NA	SH196477.06FU	1
KX909192	AK1827	ARIZ:AK1827	49	141	AKN	C2	Picea glauca	Pinophyta	Pinaceae	DLF	Leotiomycetes (Rhytismatales)	Fungi	1	Ascomycota	1	Leotiomycetes	1	Rhytismatales	1	Rhytismataceae	1	NA	NA	NA	SH196477.06FU	1
KX909193	AK1832	ARIZ:AK1832	79	213	AKN	C2	Picea glauca	Pinophyta	Pinaceae	DLF	N/A	Fungi	1	Ascomycota	0.79	Leotiomycetes	1	Rhytismatales	0.98	Rhytismataceae	0.98	NA	NA	NA	NA	NA
KX909194	AK1833	ARIZ:AK1833	53	214	AKN	C2	Picea glauca	Pinophyta	Pinaceae	DLF	Leotiomycetes (Helotiales)	Fungi	1	Ascomycota	0.99	Leotiomycetes	0.99	Helotiales	0.99	NA	NA	NA	NA	NA	SH209354.06FU	0.99
KX909195	AK1835	ARIZ:AK1835	49	215	AKN	C2	Picea glauca	Pinophyta	Pinaceae	DLF	Leotiomycetes (Rhytismatales)	Fungi	1	Ascomycota	1	Leotiomycetes	1	Rhytismatales	1	Rhytismataceae	1	NA	NA	NA	SH196477.06FU	1
KX909196	AK1836	ARIZ:AK1836	42	122	AKN	C2	Picea glauca	Pinophyta	Pinaceae	DLF	Leotiomycetes (Helotiales)	Fungi	1	Ascomycota	1	Leotiomycetes	1	Helotiales	1	Incertae sedis 2	1	Darkera	1	Darkera sp	SH222480.06FU	1
KX909197	AK1837	ARIZ:AK1837	41	203	AKN	C2	Picea glauca	Pinophyta	Pinaceae	DLF	Dothideomycetes (Dothideales)	Fungi	1	Ascomycota	1	Dothideomycetes	1	Dothideales	0.89	Dothioraceae	0.8	NA	NA	NA	SH231446.06FU	0.8
KX909198	AK1839	ARIZ:AK1839	48	121	AKN	C2	Picea glauca	Pinophyta	Pinaceae	DLF	Sordariomycetes (N/A)	Fungi	1	Ascomycota	1	Sordariomycetes	1	Diaporthales	1	Valsaceae	1	NA	NA	NA	SH211793.06FU	0.85
KX909199	AK1843	ARIZ:AK1843	51	209	AKN	C2	Picea glauca	Pinophyta	Pinaceae	DLF	Leotiomycetes (Rhytismatales)	Fungi	1	Ascomycota	1	Leotiomycetes	1	Rhytismatales	1	Rhytismataceae	1	NA	NA	NA	SH196477.06FU	1
KX909200	AK1844	ARIZ:AK1844	27	216	AKN	C3	Picea glauca	Pinophyta	Pinaceae	DLF	Leotiomycetes (N/A)	Fungi	1	Ascomycota	1	Leotiomycetes	0.99	NA	NA	NA	NA	NA	NA	NA	NA	NA
KX909201	AK1845	ARIZ:AK1845	50	217	AKN	C3	Picea glauca	Pinophyta	Pinaceae	DLF	Leotiomycetes (Rhytismatales)	Fungi	1	Ascomycota	1	Leotiomycetes	1	Rhytismatales	1	Rhytismataceae	1	NA	NA	NA	SH196477.06FU	1
KX909202	AK1846	ARIZ:AK1846	49	215	AKN	C3	Picea glauca	Pinophyta	Pinaceae	DLF	Leotiomycetes (Rhytismatales)	Fungi	1	Ascomycota	1	Leotiomycetes	1	Rhytismatales	0.98	Rhytismataceae	0.98	NA	NA	NA	SH196477.06FU	0.98
KX909203	AK1847	ARIZ:AK1847	50	124	AKN	C3	Picea glauca	Pinophyta	Pinaceae	DLF	Leotiomycetes (Rhytismatales)	Fungi	1	Ascomycota	1	Leotiomycetes	1	Rhytismatales	1	Rhytismataceae	1	NA	NA	NA	SH196477.06FU	1
KX909204	AK1848	ARIZ:AK1848	80	218	AKN	C3	Picea glauca	Pinophyta	Pinaceae	DLF	Dothideomycetes (N/A)	Fungi	1	Ascomycota	0.99	Dothideomycetes	0.99	Pleosporales	1	Venturiaceae 1	1	Rhizosphaera	1	Rhizosphaera oudemansii	SH231449.06FU	1
KX909205	AK1849	ARIZ:AK1849	85	219	AKN	C3	Picea glauca	Pinophyta	Pinaceae	DLF	N/A	Fungi	1	Ascomycota	0.83	NA	NA	NA	NA	NA	NA	NA	NA	NA	NA	NA
KX909206	AK1850	ARIZ:AK1850	49	138	AKN	C3	Picea glauca	Pinophyta	Pinaceae	DLF	Leotiomycetes (Rhytismatales)	Fungi	1	Ascomycota	1	Leotiomycetes	1	Rhytismatales	1	Rhytismataceae	1	NA	NA	NA	SH196477.06FU	1
KX909207	AK1851	ARIZ:AK1851	50	206	AKN	C3	Picea glauca	Pinophyta	Pinaceae	DLF	Leotiomycetes (Rhytismatales)	Fungi	1	Ascomycota	1	Leotiomycetes	1	Rhytismatales	1	Rhytismataceae	1	NA	NA	NA	SH196477.06FU	1
KX909208	AK1852	ARIZ:AK1852	84	220	AKN	C3	Picea glauca	Pinophyta	Pinaceae	DLF	Dothideomycetes (Pleosporales)	Fungi	1	Ascomycota	0.84	Dothideomycetes	0.82	Pleosporales	0.8	Mytilinidiaceae	0.8	Lophium	0.8	Lophium mytilinum	SH224769.06FU	0.8
KX909209	AK1853	ARIZ:AK1853	49	198	AKN	C3	Picea glauca	Pinophyta	Pinaceae	DLF	Leotiomycetes (Rhytismatales)	Fungi	1	Ascomycota	1	Leotiomycetes	1	Rhytismatales	0.95	Rhytismataceae	0.95	NA	NA	NA	SH196477.06FU	0.95
KX909210	AK1854	ARIZ:AK1854	80	204	AKN	C3	Picea glauca	Pinophyta	Pinaceae	DLF	Dothideomycetes (N/A)	Fungi	1	Ascomycota	1	Dothideomycetes	1	Pleosporales	1	Venturiaceae 1	1	Rhizosphaera	1	Rhizosphaera oudemansii	SH231449.06FU	1
KX909211	AK1855	ARIZ:AK1855	50	124	AKN	C3	Picea glauca	Pinophyta	Pinaceae	DLF	Leotiomycetes (Rhytismatales)	Fungi	1	Ascomycota	1	Leotiomycetes	1	Rhytismatales	1	Rhytismataceae	1	NA	NA	NA	SH196477.06FU	1
KX909212	AK1856	ARIZ:AK1856	80	204	AKN	C3	Picea glauca	Pinophyta	Pinaceae	DLF	Dothideomycetes (N/A)	Fungi	1	Ascomycota	1	Dothideomycetes	1	Pleosporales	1	Venturiaceae 1	1	Rhizosphaera	1	Rhizosphaera oudemansii	SH231449.06FU	1
KX909213	AK1857	ARIZ:AK1857	53	214	AKN	C3	Picea glauca	Pinophyta	Pinaceae	DLF	Leotiomycetes (Helotiales)	Fungi	1	Ascomycota	1	Leotiomycetes	1	Helotiales	1	NA	NA	NA	NA	NA	SH209354.06FU	1
KX909214	AK1858	ARIZ:AK1858	84	220	AKN	C3	Picea glauca	Pinophyta	Pinaceae	DLF	Dothideomycetes (Pleosporales)	Fungi	1	Ascomycota	0.92	Dothideomycetes	0.92	Pleosporales	0.88	Mytilinidiaceae	0.88	Lophium	0.88	Lophium mytilinum	SH224769.06FU	0.88
KX909215	AK1859	ARIZ:AK1859	51	126	AKN	C3	Picea glauca	Pinophyta	Pinaceae	DLF	Leotiomycetes (Rhytismatales)	Fungi	1	Ascomycota	1	Leotiomycetes	1	Rhytismatales	1	Rhytismataceae	1	NA	NA	NA	SH196477.06FU	1
KX909216	AK1863	ARIZ:AK1863	50	206	AKN	C3	Picea glauca	Pinophyta	Pinaceae	DLF	Leotiomycetes (Rhytismatales)	Fungi	1	Ascomycota	1	Leotiomycetes	1	Rhytismatales	1	Rhytismataceae	1	NA	NA	NA	SH196477.06FU	1
KX909217	AK1864	ARIZ:AK1864	53	214	AKN	C3	Picea glauca	Pinophyta	Pinaceae	DLF	Leotiomycetes (Helotiales)	Fungi	1	Ascomycota	0.99	Leotiomycetes	0.99	Helotiales	0.99	NA	NA	NA	NA	NA	SH209354.06FU	0.99
KX909218	AK1865	ARIZ:AK1865	50	124	AKN	C3	Picea glauca	Pinophyta	Pinaceae	DLF	Leotiomycetes (Rhytismatales)	Fungi	1	Ascomycota	1	Leotiomycetes	1	Rhytismatales	1	Rhytismataceae	1	NA	NA	NA	SH196477.06FU	1
KX909219	AK1866	ARIZ:AK1866	53	214	AKN	C3	Picea glauca	Pinophyta	Pinaceae	DLF	Leotiomycetes (Helotiales)	Fungi	1	Ascomycota	1	Leotiomycetes	1	Helotiales	1	NA	NA	NA	NA	NA	SH209354.06FU	1
KX909220	AK1867	ARIZ:AK1867	80	204	AKN	C3	Picea glauca	Pinophyta	Pinaceae	DLF	Dothideomycetes (N/A)	Fungi	1	Ascomycota	1	Dothideomycetes	1	Pleosporales	1	Venturiaceae 1	1	Rhizosphaera	1	Rhizosphaera oudemansii	SH231449.06FU	1
KX909221	AK1868	ARIZ:AK1868	50	217	AKN	C3	Picea glauca	Pinophyta	Pinaceae	DLF	Leotiomycetes (Rhytismatales)	Fungi	1	Ascomycota	1	Leotiomycetes	1	Rhytismatales	1	Rhytismataceae	1	NA	NA	NA	SH196477.06FU	1
KX909222	AK1869	ARIZ:AK1869	47	140	AKN	C3	Picea glauca	Pinophyta	Pinaceae	DLF	Leotiomycetes (Helotiales)	Fungi	1	Ascomycota	1	Leotiomycetes	1	Helotiales	1	Incertae sedis 2	1	Darkera	1	Darkera sp	SH222480.06FU	1
KX909223	AK1870	ARIZ:AK1870	80	221	AKN	C3	Picea glauca	Pinophyta	Pinaceae	DLF	Dothideomycetes (Pleosporales)	Fungi	1	Ascomycota	1	Dothideomycetes	1	Pleosporales	1	Venturiaceae 1	1	Rhizosphaera	1	Rhizosphaera oudemansii	SH231449.06FU	1
KX909224	AK1871	ARIZ:AK1871	51	126	AKN	C3	Picea glauca	Pinophyta	Pinaceae	DLF	Leotiomycetes (Rhytismatales)	Fungi	1	Ascomycota	1	Leotiomycetes	1	Rhytismatales	1	Rhytismataceae	1	NA	NA	NA	SH196477.06FU	1
KX909164	AK1872	ARIZ:AK1872	23	36	AKN	C1	Betula nana	Angiospermae	Betulaceae	LLF	Pezizomycetes (Pezizales)	Fungi	1	Ascomycota	1	Pezizomycetes	1	Pezizales	1	Pezizaceae	1	Peziza	1	Peziza sp	SH217067.06FU	1
KX909225	AK1873	ARIZ:AK1873	49	142	AKN	C1	Picea glauca	Pinophyta	Pinaceae	LLF	Leotiomycetes (Rhytismatales)	Fungi	1	Ascomycota	1	Leotiomycetes	1	Rhytismatales	1	Rhytismataceae	1	NA	NA	NA	SH196477.06FU	1
KX909226	AK1874	ARIZ:AK1874	86	222	AKN	C1	Picea glauca	Pinophyta	Pinaceae	LLF	Leotiomycetes (Helotiales)	Fungi	1	Ascomycota	1	Leotiomycetes	1	Helotiales	1	NA	NA	NA	NA	NA	SH209279.06FU	1
KX909227	AK1875	ARIZ:AK1875	41	203	AKN	C1	Picea glauca	Pinophyta	Pinaceae	LLF	Dothideomycetes (Dothideales)	Fungi	1	Ascomycota	1	Dothideomycetes	1	Dothideales	0.92	Dothioraceae	0.91	NA	NA	NA	SH231446.06FU	0.91
KX909228	AK1877	ARIZ:AK1877	51	126	AKN	C1	Picea glauca	Pinophyta	Pinaceae	LLF	Leotiomycetes (Rhytismatales)	Fungi	1	Ascomycota	1	Leotiomycetes	1	Rhytismatales	1	Rhytismataceae	1	NA	NA	NA	SH196477.06FU	1
KX909229	AK1879	ARIZ:AK1879	51	126	AKN	C1	Picea glauca	Pinophyta	Pinaceae	LLF	Leotiomycetes (Rhytismatales)	Fungi	1	Ascomycota	1	Leotiomycetes	1	Rhytismatales	1	Rhytismataceae	1	NA	NA	NA	SH196477.06FU	1
KX909230	AK1880	ARIZ:AK1880	49	215	AKN	C1	Picea glauca	Pinophyta	Pinaceae	LLF	Leotiomycetes (Rhytismatales)	Fungi	1	Ascomycota	1	Leotiomycetes	1	Rhytismatales	1	Rhytismataceae	1	NA	NA	NA	SH196477.06FU	1
KX909231	AK1881	ARIZ:AK1881	50	223	AKN	C1	Picea glauca	Pinophyta	Pinaceae	LLF	Leotiomycetes (Rhytismatales)	Fungi	1	Ascomycota	1	Leotiomycetes	1	Rhytismatales	1	Rhytismataceae	1	NA	NA	NA	SH196477.06FU	1
KX909232	AK1882	ARIZ:AK1882	49	198	AKN	C1	Picea glauca	Pinophyta	Pinaceae	LLF	Leotiomycetes (Rhytismatales)	Fungi	1	Ascomycota	1	Leotiomycetes	1	Rhytismatales	1	Rhytismataceae	1	NA	NA	NA	SH196477.06FU	1
KX909233	AK1883	ARIZ:AK1883	49	141	AKN	C1	Picea glauca	Pinophyta	Pinaceae	LLF	Leotiomycetes (Rhytismatales)	Fungi	1	Ascomycota	1	Leotiomycetes	1	Rhytismatales	1	Rhytismataceae	1	NA	NA	NA	SH196477.06FU	1
KX909234	AK1884	ARIZ:AK1884	51	126	AKN	C1	Picea glauca	Pinophyta	Pinaceae	LLF	Leotiomycetes (Rhytismatales)	Fungi	1	Ascomycota	1	Leotiomycetes	1	Rhytismatales	1	Rhytismataceae	1	NA	NA	NA	SH196477.06FU	1
KX909235	AK1885	ARIZ:AK1885	49	224	AKN	C1	Picea glauca	Pinophyta	Pinaceae	LLF	Leotiomycetes (Rhytismatales)	Fungi	1	Ascomycota	1	Leotiomycetes	1	Rhytismatales	1	Rhytismataceae	1	NA	NA	NA	SH196477.06FU	1
KX909236	AK1886	ARIZ:AK1886	50	143	AKN	C1	Picea glauca	Pinophyta	Pinaceae	LLF	Leotiomycetes (N/A)	Fungi	1	Ascomycota	1	Leotiomycetes	1	Rhytismatales	1	Rhytismataceae	1	NA	NA	NA	NA	NA
KX909237	AK1887	ARIZ:AK1887	68	225	AKN	C1	Picea glauca	Pinophyta	Pinaceae	LLF	N/A	Fungi	1	Ascomycota	1	Leotiomycetes	1	Helotiales	1	NA	NA	NA	NA	NA	NA	NA
KX909238	AK1889	ARIZ:AK1889	51	126	AKN	C1	Picea glauca	Pinophyta	Pinaceae	LLF	Leotiomycetes (Rhytismatales)	Fungi	1	Ascomycota	1	Leotiomycetes	1	Rhytismatales	1	Rhytismataceae	1	NA	NA	NA	SH196477.06FU	1
KX909239	AK1890	ARIZ:AK1890	77	200	AKN	C1	Picea glauca	Pinophyta	Pinaceae	LLF	N/A	Fungi	1	Ascomycota	0.83	Leotiomycetes	1	NA	NA	NA	NA	NA	NA	NA	NA	NA
KX909240	AK1891	ARIZ:AK1891	50	124	AKN	C1	Picea glauca	Pinophyta	Pinaceae	LLF	Leotiomycetes (Rhytismatales)	Fungi	1	Ascomycota	1	Leotiomycetes	1	Rhytismatales	1	Rhytismataceae	1	NA	NA	NA	SH196477.06FU	1
KX909241	AK1892	ARIZ:AK1892	53	226	AKN	C1	Picea glauca	Pinophyta	Pinaceae	LLF	Leotiomycetes (Helotiales)	Fungi	1	Ascomycota	1	Leotiomycetes	1	Helotiales	1	NA	NA	NA	NA	NA	SH209354.06FU	1
KX909242	AK1893	ARIZ:AK1893	77	200	AKN	C1	Picea glauca	Pinophyta	Pinaceae	LLF	N/A	Fungi	1	Ascomycota	0.82	Leotiomycetes	1	NA	NA	NA	NA	NA	NA	NA	NA	NA
KX909243	AK1894	ARIZ:AK1894	50	124	AKN	C1	Picea glauca	Pinophyta	Pinaceae	LLF	Leotiomycetes (Rhytismatales)	Fungi	1	Ascomycota	1	Leotiomycetes	1	Rhytismatales	1	Rhytismataceae	1	NA	NA	NA	SH196477.06FU	1
KX909244	AK1897	ARIZ:AK1897	68	187	AKN	C3	Picea glauca	Pinophyta	Pinaceae	LLF	Leotiomycetes (Helotiales)	Fungi	1	Ascomycota	1	Leotiomycetes	0.98	Helotiales	0.98	NA	NA	NA	NA	NA	SH208247.06FU	0.98
KX909245	AK1898	ARIZ:AK1898	87	227	AKN	C3	Picea glauca	Pinophyta	Pinaceae	LLF	Dothideomycetes (Venturiales)	Fungi	1	Ascomycota	1	Dothideomycetes	1	Venturiales	0.98	Venturiaceae	0.98	NA	NA	NA	SH238395.06FU	0.98
KX909246	AK1899	ARIZ:AK1899	68	187	AKN	C3	Picea glauca	Pinophyta	Pinaceae	LLF	Leotiomycetes (Helotiales)	Fungi	1	Ascomycota	1	Leotiomycetes	1	Helotiales	1	NA	NA	NA	NA	NA	SH208247.06FU	1
KX909247	AK1901	ARIZ:AK1901	51	209	AKN	C3	Picea glauca	Pinophyta	Pinaceae	LLF	Leotiomycetes (Rhytismatales)	Fungi	1	Ascomycota	1	Leotiomycetes	1	Rhytismatales	1	Rhytismataceae	1	NA	NA	NA	SH196477.06FU	1
KX909248	AK1903	ARIZ:AK1903	68	187	AKN	C3	Picea glauca	Pinophyta	Pinaceae	LLF	Leotiomycetes (Helotiales)	Fungi	1	Ascomycota	1	Leotiomycetes	0.99	Helotiales	0.99	NA	NA	NA	NA	NA	SH208247.06FU	0.99
KX909249	AK1906	ARIZ:AK1906	69	188	AKN	C3	Picea glauca	Pinophyta	Pinaceae	LLF	Dothideomycetes (N/A)	Fungi	1	Ascomycota	0.99	Dothideomycetes	0.94	NA	NA	NA	NA	NA	NA	NA	NA	NA
KX909250	AK1907	ARIZ:AK1907	68	205	AKN	C3	Picea glauca	Pinophyta	Pinaceae	LLF	N/A	Fungi	1	Ascomycota	1	Leotiomycetes	1	Helotiales	1	NA	NA	NA	NA	NA	NA	NA
KX909251	AK1908	ARIZ:AK1908	80	204	AKN	C3	Picea glauca	Pinophyta	Pinaceae	LLF	Dothideomycetes (N/A)	Fungi	1	Ascomycota	1	Dothideomycetes	1	Pleosporales	1	Venturiaceae 1	1	Rhizosphaera	1	Rhizosphaera oudemansii	SH231449.06FU	1
HM122763	AZ0005	ARIZ:AZ0005	21	30	AZC	C2	Juniperus deppeana	Pinophyta	Cupressaceae	DLF	Pezizomycetes (Pezizales)	Fungi	1	Ascomycota	1	Pezizomycetes	1	Pezizales	1	Pyronemataceae	1	Geopyxis	1	Geopyxis sp	SH229656.06FU	1
HM122764	AZ0006	ARIZ:AZ0006	21	30	AZC	C2	Juniperus deppeana	Pinophyta	Cupressaceae	DLF	Pezizomycetes (Pezizales)	Fungi	1	Ascomycota	1	Pezizomycetes	1	Pezizales	1	Pyronemataceae	1	Geopyxis	1	Geopyxis sp	SH229656.06FU	1
HM122766	AZ0009	ARIZ:AZ0009	88	228	AZC	C1	Quercus rugosa	Angiospermae	Fagaceae	LLF	Sordariomycetes (N/A)	Fungi	1	Ascomycota	1	Sordariomycetes	1	NA	NA	NA	NA	NA	NA	NA	SH205984.06FU	1
HM122767	AZ0010	ARIZ:AZ0010	89	229	AZC	C1	Quercus rugosa	Angiospermae	Fagaceae	LLF	N/A	Fungi	1	NA	NA	NA	NA	NA	NA	NA	NA	NA	NA	NA	NA	NA
HM122768	AZ0011	ARIZ:AZ0011	88	228	AZC	C1	Quercus rugosa	Angiospermae	Fagaceae	LLF	Sordariomycetes (N/A)	Fungi	1	Ascomycota	1	Sordariomycetes	0.98	NA	NA	NA	NA	NA	NA	NA	SH205984.06FU	0.98
HM122769	AZ0012	ARIZ:AZ0012	88	228	AZC	C1	Quercus rugosa	Angiospermae	Fagaceae	LLF	Sordariomycetes (N/A)	Fungi	1	Ascomycota	1	Sordariomycetes	0.99	NA	NA	NA	NA	NA	NA	NA	SH205984.06FU	0.99
HM122770	AZ0013	ARIZ:AZ0013	53	230	AZC	C2	Pinus arizonica var. arizonica	Pinophyta	Pinaceae	LLF	Leotiomycetes (Helotiales)	Fungi	1	Ascomycota	0.98	Leotiomycetes	0.98	Helotiales	0.98	NA	NA	NA	NA	NA	SH209354.06FU	0.98
HM122771	AZ0014	ARIZ:AZ0014	53	230	AZC	C2	Pinus arizonica var. arizonica	Pinophyta	Pinaceae	LLF	Leotiomycetes (Helotiales)	Fungi	1	Ascomycota	0.98	Leotiomycetes	0.98	Helotiales	0.98	NA	NA	NA	NA	NA	SH209354.06FU	0.98
HM122772	AZ0015	ARIZ:AZ0015	53	230	AZC	C2	Pinus arizonica var. arizonica	Pinophyta	Pinaceae	LLF	Leotiomycetes (Helotiales)	Fungi	1	Ascomycota	1	Leotiomycetes	1	Helotiales	1	NA	NA	NA	NA	NA	SH209354.06FU	1
HM122773	AZ0016	ARIZ:AZ0016	53	230	AZC	C2	Pinus arizonica var. arizonica	Pinophyta	Pinaceae	LLF	Leotiomycetes (Helotiales)	Fungi	1	Ascomycota	0.99	Leotiomycetes	0.99	Helotiales	0.99	NA	NA	NA	NA	NA	SH209354.06FU	0.99
HM122774	AZ0017	ARIZ:AZ0017	53	230	AZC	C2	Pinus arizonica var. arizonica	Pinophyta	Pinaceae	LLF	Leotiomycetes (Helotiales)	Fungi	1	Ascomycota	0.99	Leotiomycetes	0.99	Helotiales	0.99	NA	NA	NA	NA	NA	SH209354.06FU	0.99
HM122775	AZ0018	ARIZ:AZ0018	53	230	AZC	C2	Pinus arizonica var. arizonica	Pinophyta	Pinaceae	LLF	Leotiomycetes (Helotiales)	Fungi	1	Ascomycota	1	Leotiomycetes	1	Helotiales	1	NA	NA	NA	NA	NA	SH209354.06FU	1
HM122776	AZ0019	ARIZ:AZ0019	53	230	AZC	C2	Pinus arizonica var. arizonica	Pinophyta	Pinaceae	LLF	Leotiomycetes (Helotiales)	Fungi	1	Ascomycota	1	Leotiomycetes	1	Helotiales	1	NA	NA	NA	NA	NA	SH209354.06FU	1
HM122777	AZ0020	ARIZ:AZ0020	53	230	AZC	C2	Pinus arizonica var. arizonica	Pinophyta	Pinaceae	LLF	Leotiomycetes (Helotiales)	Fungi	1	Ascomycota	1	Leotiomycetes	1	Helotiales	1	NA	NA	NA	NA	NA	SH209354.06FU	1
HM122778	AZ0021	ARIZ:AZ0021	53	230	AZC	C2	Pinus arizonica var. arizonica	Pinophyta	Pinaceae	LLF	Leotiomycetes (Helotiales)	Fungi	1	Ascomycota	1	Leotiomycetes	1	Helotiales	1	NA	NA	NA	NA	NA	SH209354.06FU	1
HM122779	AZ0022	ARIZ:AZ0022	53	230	AZC	C2	Pinus arizonica var. arizonica	Pinophyta	Pinaceae	LLF	Leotiomycetes (Helotiales)	Fungi	1	Ascomycota	1	Leotiomycetes	1	Helotiales	1	NA	NA	NA	NA	NA	SH209354.06FU	1
HM122780	AZ0023	ARIZ:AZ0023	53	230	AZC	C2	Pinus arizonica var. arizonica	Pinophyta	Pinaceae	LLF	Leotiomycetes (Helotiales)	Fungi	1	Ascomycota	1	Leotiomycetes	1	Helotiales	1	NA	NA	NA	NA	NA	SH209354.06FU	1
HM122784	AZ0027A	ARIZ:AZ0027A	21	30	AZC	C2	Pseudotsuga menziesii	Pinophyta	Pinaceae	DLF	Pezizomycetes (Pezizales)	Fungi	1	Ascomycota	1	Pezizomycetes	1	Pezizales	1	Pyronemataceae	1	Geopyxis	1	Geopyxis sp	SH229656.06FU	1
HM122785	AZ0028	ARIZ:AZ0028	26	41	AZC	C2	Juniperus deppeana	Pinophyta	Cupressaceae	DLF	Pezizomycetes (Pezizales)	Fungi	1	Ascomycota	1	Pezizomycetes	1	Pezizales	1	Pyronemataceae	1	Geopyxis	1	Geopyxis sp	SH229656.06FU	1
HM122786	AZ0029	ARIZ:AZ0029	90	232	AZC	C2	Juniperus deppeana	Pinophyta	Cupressaceae	DLF	N/A	Fungi	1	NA	NA	NA	NA	NA	NA	NA	NA	NA	NA	NA	SH234093.06FU	1
HM122787	AZ0030	ARIZ:AZ0030	21	233	AZC	C2	Juniperus deppeana	Pinophyta	Cupressaceae	DLF	Pezizomycetes (Pezizales)	Fungi	1	Ascomycota	1	Pezizomycetes	1	Pezizales	1	Pyronemataceae	1	Geopyxis	1	Geopyxis sp	SH238101.06FU	1
HM122788	AZ0031	ARIZ:AZ0031	90	232	AZC	C2	Juniperus deppeana	Pinophyta	Cupressaceae	DLF	N/A	Fungi	1	NA	NA	NA	NA	NA	NA	NA	NA	NA	NA	NA	SH234093.06FU	1
HM122795	AZ0038A	ARIZ:AZ0038A	29	46	AZC	C1	Juniperus deppeana	Pinophyta	Cupressaceae	DLF	Dothideomycetes (Pleosporales)	Fungi	1	Ascomycota	1	Dothideomycetes	1	Pleosporales	1	Pleosporaceae	1	Alternaria	1	Alternaria sp 3 MU 2012	SH224849.06FU	0.93
HM122810	AZ0053B	ARIZ:AZ0053B	90	232	AZC	C3	Juniperus deppeana	Pinophyta	Cupressaceae	Endophyte	N/A	Fungi	1	NA	NA	NA	NA	NA	NA	NA	NA	NA	NA	NA	SH234093.06FU	1
HM122820	AZ0063	ARIZ:AZ0063	88	243	AZC	C1	Quercus rugosa	Angiospermae	Fagaceae	LLF	Sordariomycetes (N/A)	Fungi	1	Ascomycota	1	Sordariomycetes	0.99	NA	NA	NA	NA	NA	NA	NA	SH205984.06FU	0.99
HM122821	AZ0064	ARIZ:AZ0064	88	228	AZC	C1	Quercus rugosa	Angiospermae	Fagaceae	LLF	Sordariomycetes (N/A)	Fungi	1	Ascomycota	1	Sordariomycetes	1	NA	NA	NA	NA	NA	NA	NA	SH205984.06FU	1
HM122824	AZ0070	ARIZ:AZ0070	53	230	AZC	C2	Pinus arizonica var. arizonica	Pinophyta	Pinaceae	LLF	Leotiomycetes (Helotiales)	Fungi	1	Ascomycota	1	Leotiomycetes	1	Helotiales	1	NA	NA	NA	NA	NA	SH209354.06FU	1
HM122825	AZ0071	ARIZ:AZ0071	53	230	AZC	C2	Pinus arizonica var. arizonica	Pinophyta	Pinaceae	LLF	Leotiomycetes (Helotiales)	Fungi	1	Ascomycota	1	Leotiomycetes	1	Helotiales	1	NA	NA	NA	NA	NA	SH209354.06FU	1
HM122826	AZ0072	ARIZ:AZ0072	53	230	AZC	C2	Pinus arizonica var. arizonica	Pinophyta	Pinaceae	LLF	Leotiomycetes (Helotiales)	Fungi	1	Ascomycota	1	Leotiomycetes	1	Helotiales	1	NA	NA	NA	NA	NA	SH209354.06FU	1
HM122827	AZ0073	ARIZ:AZ0073	53	230	AZC	C2	Pinus arizonica var. arizonica	Pinophyta	Pinaceae	LLF	Leotiomycetes (Helotiales)	Fungi	1	Ascomycota	1	Leotiomycetes	1	Helotiales	1	NA	NA	NA	NA	NA	SH209354.06FU	1
HM122828	AZ0074A	ARIZ:AZ0074A	53	230	AZC	C2	Pinus arizonica var. arizonica	Pinophyta	Pinaceae	LLF	Leotiomycetes (Helotiales)	Fungi	1	Ascomycota	1	Leotiomycetes	1	Helotiales	1	NA	NA	NA	NA	NA	SH209354.06FU	1
HM122829	AZ0075	ARIZ:AZ0075	53	230	AZC	C2	Pinus arizonica var. arizonica	Pinophyta	Pinaceae	LLF	Leotiomycetes (Helotiales)	Fungi	1	Ascomycota	1	Leotiomycetes	1	Helotiales	1	NA	NA	NA	NA	NA	SH209354.06FU	1
HM122835	AZ0081	ARIZ:AZ0081	53	230	AZC	C1	Pinus arizonica var. arizonica	Pinophyta	Pinaceae	LLF	Leotiomycetes (Helotiales)	Fungi	1	Ascomycota	1	Leotiomycetes	1	Helotiales	1	NA	NA	NA	NA	NA	SH209354.06FU	1
HM122836	AZ0082	ARIZ:AZ0082	53	230	AZC	C1	Pinus arizonica var. arizonica	Pinophyta	Pinaceae	LLF	Leotiomycetes (Helotiales)	Fungi	1	Ascomycota	1	Leotiomycetes	1	Helotiales	1	NA	NA	NA	NA	NA	SH209354.06FU	1
HM122837	AZ0083A	ARIZ:AZ0083A	90	232	AZC	C1	Pinus arizonica var. arizonica	Pinophyta	Pinaceae	LLF	N/A	Fungi	1	NA	NA	NA	NA	NA	NA	NA	NA	NA	NA	NA	SH234093.06FU	1
HM122838	AZ0084	ARIZ:AZ0084	53	230	AZC	C1	Pinus arizonica var. arizonica	Pinophyta	Pinaceae	LLF	Leotiomycetes (Helotiales)	Fungi	1	Ascomycota	1	Leotiomycetes	1	Helotiales	1	NA	NA	NA	NA	NA	SH209354.06FU	1
HM122841	AZ0088	ARIZ:AZ0088	93	244	AZC	C1	Pinus arizonica var. arizonica	Pinophyta	Pinaceae	LLF	Pezizomycetes (Pezizales)	Fungi	1	Ascomycota	1	Pezizomycetes	1	Pezizales	1	Pyronemataceae	1	Micronematobotrys	1	Micronematobotrys sp	SH234092.06FU	1
HM122842	AZ0089	ARIZ:AZ0089	95	245	AZC	C1	Pinus arizonica var. arizonica	Pinophyta	Pinaceae	DLF	Leotiomycetes (Rhytismatales)	Fungi	1	Ascomycota	1	Leotiomycetes	1	Rhytismatales	1	NA	NA	NA	NA	NA	SH240310.06FU	1
HM122843	AZ0090	ARIZ:AZ0090	95	245	AZC	C1	Pinus arizonica var. arizonica	Pinophyta	Pinaceae	DLF	Leotiomycetes (Rhytismatales)	Fungi	1	Ascomycota	1	Leotiomycetes	1	Rhytismatales	1	NA	NA	NA	NA	NA	SH240310.06FU	1
HM122844	AZ0091	ARIZ:AZ0091	95	245	AZC	C1	Pinus arizonica var. arizonica	Pinophyta	Pinaceae	DLF	Leotiomycetes (Rhytismatales)	Fungi	1	Ascomycota	1	Leotiomycetes	1	Rhytismatales	1	NA	NA	NA	NA	NA	SH240310.06FU	1
HM122850	AZ0097	ARIZ:AZ0097	21	30	AZC	C1	Juniperus deppeana	Pinophyta	Cupressaceae	DLF	Pezizomycetes (Pezizales)	Fungi	1	Ascomycota	1	Pezizomycetes	1	Pezizales	1	Pyronemataceae	1	Geopyxis	1	Geopyxis sp	SH229656.06FU	1
HM122851	AZ0098	ARIZ:AZ0098	31	247	AZC	C1	Juniperus deppeana	Pinophyta	Cupressaceae	DLF	Dothideomycetes (Pleosporales)	Fungi	1	Ascomycota	1	Dothideomycetes	1	Pleosporales	1	Montagnulaceae	1	Paraconiothyrium	1	Paraconiothyrium hawaiiense	SH228689.06FU	0.85
HM122852	AZ0099	ARIZ:AZ0099	93	236	AZC	C1	Juniperus deppeana	Pinophyta	Cupressaceae	DLF	Pezizomycetes (Pezizales)	Fungi	1	Ascomycota	1	Pezizomycetes	1	Pezizales	1	Pyronemataceae	1	Micronematobotrys	1	Micronematobotrys sp	SH234092.06FU	1
HM122857	AZ0104	ARIZ:AZ0104	94	242	AZC	C2	Quercus rugosa	Angiospermae	Fagaceae	LLF	Pezizomycetes (N/A)	Fungi	1	Ascomycota	1	Pezizomycetes	1	NA	NA	NA	NA	NA	NA	NA	SH228999.06FU	1
HM122858	AZ0106	ARIZ:AZ0106	96	250	AZC	C2	Quercus rugosa	Angiospermae	Fagaceae	LLF	Sordariomycetes (Diaporthales)	Fungi	1	Ascomycota	1	Sordariomycetes	1	Diaporthales	1	Gnomoniaceae	1	Gnomonia	1	Gnomoniopsis paraclavulata	SH129087.06FU	1
HM122860	AZ0109	ARIZ:AZ0109	48	251	AZC	C3	Juniperus deppeana	Pinophyta	Cupressaceae	LLF	Sordariomycetes (N/A)	Fungi	1	Ascomycota	1	Sordariomycetes	1	Diaporthales	1	Valsaceae	1	NA	NA	NA	SH211793.06FU	0.99
HM122861	AZ0110	ARIZ:AZ0110	48	252	AZC	C3	Juniperus deppeana	Pinophyta	Cupressaceae	LLF	Sordariomycetes (Diaporthales)	Fungi	1	Ascomycota	1	Sordariomycetes	1	Diaporthales	1	Valsaceae	1	NA	NA	NA	SH211820.06FU	1
HM122862	AZ0111	ARIZ:AZ0111	92	253	AZC	C2	Juniperus deppeana	Pinophyta	Cupressaceae	Endophyte	Pezizomycetes (Pezizales)	Fungi	1	Ascomycota	1	Pezizomycetes	1	Pezizales	1	Pyronemataceae	1	Ascorhizoctonia	0.94	Ascorhizoctonia sp	SH214104.06FU	0.94
HM122866	AZ0114	ARIZ:AZ0114	53	230	AZC	C1	Quercus rugosa	Angiospermae	Fagaceae	LLF	Leotiomycetes (Helotiales)	Fungi	1	Ascomycota	1	Leotiomycetes	1	Helotiales	1	NA	NA	NA	NA	NA	SH209354.06FU	1
HM122867	AZ0115	ARIZ:AZ0115	53	230	AZC	C1	Quercus rugosa	Angiospermae	Fagaceae	LLF	Leotiomycetes (Helotiales)	Fungi	1	Ascomycota	1	Leotiomycetes	1	Helotiales	1	NA	NA	NA	NA	NA	SH209354.06FU	1
HM122868	AZ0117	ARIZ:AZ0117	53	230	AZC	C1	Quercus rugosa	Angiospermae	Fagaceae	LLF	Leotiomycetes (Helotiales)	Fungi	1	Ascomycota	1	Leotiomycetes	1	Helotiales	1	NA	NA	NA	NA	NA	SH209354.06FU	1
HM122873	AZ0122A	ARIZ:AZ0122A	53	230	AZC	C3	Juniperus deppeana	Pinophyta	Cupressaceae	DLF	Leotiomycetes (Helotiales)	Fungi	1	Ascomycota	1	Leotiomycetes	1	Helotiales	1	NA	NA	NA	NA	NA	SH209354.06FU	1
HM122874	AZ0122B	ARIZ:AZ0122B	90	232	AZC	C3	Juniperus deppeana	Pinophyta	Cupressaceae	DLF	N/A	Fungi	1	NA	NA	NA	NA	NA	NA	NA	NA	NA	NA	NA	SH234093.06FU	1
HM122875	AZ0123A	ARIZ:AZ0123A	53	230	AZC	C3	Juniperus deppeana	Pinophyta	Cupressaceae	DLF	Leotiomycetes (Helotiales)	Fungi	1	Ascomycota	1	Leotiomycetes	1	Helotiales	1	NA	NA	NA	NA	NA	SH209354.06FU	1
HM122876	AZ0123B	ARIZ:AZ0123B	90	232	AZC	C3	Juniperus deppeana	Pinophyta	Cupressaceae	DLF	N/A	Fungi	1	NA	NA	NA	NA	NA	NA	NA	NA	NA	NA	NA	SH234093.06FU	1
HM122877	AZ0124	ARIZ:AZ0124	97	254	AZC	C3	Juniperus deppeana	Pinophyta	Cupressaceae	DLF	Pezizomycetes (Pezizales)	Fungi	1	Ascomycota	1	Pezizomycetes	1	Pezizales	1	Sarcosomataceae	1	Plectania	1	Plectania sp	SH226008.06FU	1
HM122878	AZ0125	ARIZ:AZ0125	90	232	AZC	C2	Juniperus deppeana	Pinophyta	Cupressaceae	DLF	N/A	Fungi	1	NA	NA	NA	NA	NA	NA	NA	NA	NA	NA	NA	SH234093.06FU	1
HM122879	AZ0126	ARIZ:AZ0126	21	30	AZC	C2	Juniperus deppeana	Pinophyta	Cupressaceae	DLF	Pezizomycetes (Pezizales)	Fungi	1	Ascomycota	1	Pezizomycetes	1	Pezizales	1	Pyronemataceae	1	Geopyxis	1	Geopyxis sp	SH229656.06FU	1
HM122891	AZ0137	ARIZ:AZ0137	90	232	AZC	C3	Juniperus deppeana	Pinophyta	Cupressaceae	DLF	N/A	Fungi	1	NA	NA	NA	NA	NA	NA	NA	NA	NA	NA	NA	SH234093.06FU	1
HM122892	AZ0138	ARIZ:AZ0138	57	255	AZC	C3	Juniperus deppeana	Pinophyta	Cupressaceae	DLF	Dothideomycetes (N/A)	Fungi	1	Ascomycota	1	Dothideomycetes	1	Pleosporales	0.94	Sporormiaceae	0.94	NA	NA	NA	SH190472.06FU	1
HM122893	AZ0139	ARIZ:AZ0139	98	256	AZC	C3	Juniperus deppeana	Pinophyta	Cupressaceae	DLF	Dothideomycetes (N/A)	Fungi	1	Ascomycota	1	Dothideomycetes	1	NA	NA	NA	NA	NA	NA	NA	SH224127.06FU	1
HM122894	AZ0140	ARIZ:AZ0140	99	257	AZC	C3	Juniperus deppeana	Pinophyta	Cupressaceae	DLF	Leotiomycetes (Helotiales)	Fungi	1	Ascomycota	1	Leotiomycetes	1	Helotiales	1	NA	NA	NA	NA	NA	SH215666.06FU	1
HM122897	AZ0144	ARIZ:AZ0144	21	30	AZC	C2	Juniperus deppeana	Pinophyta	Cupressaceae	LLF	Pezizomycetes (Pezizales)	Fungi	1	Ascomycota	1	Pezizomycetes	1	Pezizales	1	Pyronemataceae	1	Geopyxis	1	Geopyxis sp	SH229656.06FU	1
HM122898	AZ0145	ARIZ:AZ0145	91	234	AZC	C2	Juniperus deppeana	Pinophyta	Cupressaceae	LLF	Sordariomycetes (N/A)	Fungi	1	Ascomycota	1	Sordariomycetes	1	NA	NA	NA	NA	NA	NA	NA	SH227121.06FU	1
HM122899	AZ0146	ARIZ:AZ0146	91	234	AZC	C1	Juniperus deppeana	Pinophyta	Cupressaceae	LLF	Sordariomycetes (N/A)	Fungi	1	Ascomycota	1	Sordariomycetes	1	NA	NA	NA	NA	NA	NA	NA	SH227121.06FU	1
HM122900	AZ0147	ARIZ:AZ0147	7	8	AZC	C1	Juniperus deppeana	Pinophyta	Cupressaceae	LLF	Sordariomycetes (N/A)	Fungi	1	Ascomycota	1	Sordariomycetes	1	NA	NA	NA	NA	NA	NA	NA	SH234917.06FU	0.98
HM122901	AZ0148	ARIZ:AZ0148	24	39	AZC	C1	Juniperus deppeana	Pinophyta	Cupressaceae	LLF	Pezizomycetes (Pezizales)	Fungi	1	Ascomycota	1	Pezizomycetes	1	Pezizales	1	Pezizaceae	1	Chromelosporium	1	Chromelosporium sp	SH216391.06FU	1
HM122902	AZ0149	ARIZ:AZ0149	31	247	AZC	C1	Juniperus deppeana	Pinophyta	Cupressaceae	LLF	Dothideomycetes (Pleosporales)	Fungi	1	Ascomycota	1	Dothideomycetes	1	Pleosporales	1	Montagnulaceae	1	Paraconiothyrium	1	Paraconiothyrium hawaiiense	SH228689.06FU	0.85
HM122906	AZ0153	ARIZ:AZ0153	88	228	AZC	C3	Quercus rugosa	Angiospermae	Fagaceae	DLF	Sordariomycetes (N/A)	Fungi	1	Ascomycota	1	Sordariomycetes	0.98	NA	NA	NA	NA	NA	NA	NA	SH205984.06FU	0.98
HM122907	AZ0154	ARIZ:AZ0154	88	258	AZC	C3	Quercus rugosa	Angiospermae	Fagaceae	DLF	Sordariomycetes (N/A)	Fungi	1	Ascomycota	1	Sordariomycetes	1	NA	NA	NA	NA	NA	NA	NA	SH205984.06FU	0.98
HM122908	AZ0156	ARIZ:AZ0156	88	228	AZC	C3	Quercus rugosa	Angiospermae	Fagaceae	DLF	Sordariomycetes (N/A)	Fungi	1	Ascomycota	1	Sordariomycetes	0.99	NA	NA	NA	NA	NA	NA	NA	SH205984.06FU	0.99
HM122909	AZ0157	ARIZ:AZ0157	88	228	AZC	C3	Quercus rugosa	Angiospermae	Fagaceae	DLF	Sordariomycetes (N/A)	Fungi	1	Ascomycota	1	Sordariomycetes	0.98	NA	NA	NA	NA	NA	NA	NA	SH205984.06FU	0.98
HM122910	AZ0158	ARIZ:AZ0158	88	228	AZC	C3	Quercus rugosa	Angiospermae	Fagaceae	DLF	Sordariomycetes (N/A)	Fungi	1	Ascomycota	1	Sordariomycetes	0.98	NA	NA	NA	NA	NA	NA	NA	SH205984.06FU	0.98
HM122911	AZ0159	ARIZ:AZ0159	88	259	AZC	C3	Quercus rugosa	Angiospermae	Fagaceae	DLF	N/A	Fungi	1	Ascomycota	1	Sordariomycetes	0.98	NA	NA	NA	NA	NA	NA	NA	SH205985.06FU	1
HM122912	AZ0160	ARIZ:AZ0160	88	259	AZC	C3	Quercus rugosa	Angiospermae	Fagaceae	DLF	N/A	Fungi	1	Ascomycota	1	Sordariomycetes	0.98	NA	NA	NA	NA	NA	NA	NA	SH205985.06FU	1
HM122923	AZ0172	ARIZ:AZ0172	53	230	AZC	C2	Pinus arizonica var. arizonica	Pinophyta	Pinaceae	LLF	Leotiomycetes (Helotiales)	Fungi	1	Ascomycota	1	Leotiomycetes	1	Helotiales	1	NA	NA	NA	NA	NA	SH209354.06FU	1
HM122924	AZ0173	ARIZ:AZ0173	53	230	AZC	C2	Pinus arizonica var. arizonica	Pinophyta	Pinaceae	LLF	Leotiomycetes (Helotiales)	Fungi	1	Ascomycota	1	Leotiomycetes	1	Helotiales	1	NA	NA	NA	NA	NA	SH209354.06FU	1
HM122925	AZ0174	ARIZ:AZ0174	53	230	AZC	C2	Pinus arizonica var. arizonica	Pinophyta	Pinaceae	LLF	Leotiomycetes (Helotiales)	Fungi	1	Ascomycota	1	Leotiomycetes	1	Helotiales	1	NA	NA	NA	NA	NA	SH209354.06FU	1
HM122926	AZ0175	ARIZ:AZ0175	53	230	AZC	C2	Pinus arizonica var. arizonica	Pinophyta	Pinaceae	LLF	Leotiomycetes (Helotiales)	Fungi	1	Ascomycota	1	Leotiomycetes	1	Helotiales	1	NA	NA	NA	NA	NA	SH209354.06FU	1
HM122927	AZ0176	ARIZ:AZ0176	53	230	AZC	C2	Pinus arizonica var. arizonica	Pinophyta	Pinaceae	LLF	Leotiomycetes (Helotiales)	Fungi	1	Ascomycota	1	Leotiomycetes	1	Helotiales	1	NA	NA	NA	NA	NA	SH209354.06FU	1
HM122928	AZ0177	ARIZ:AZ0177	53	230	AZC	C2	Pinus arizonica var. arizonica	Pinophyta	Pinaceae	LLF	Leotiomycetes (Helotiales)	Fungi	1	Ascomycota	1	Leotiomycetes	1	Helotiales	1	NA	NA	NA	NA	NA	SH209354.06FU	1
HM122934	AZ0184	ARIZ:AZ0184	59	264	AZC	C2	Pseudotsuga menziesii	Pinophyta	Pinaceae	LLF	Dothideomycetes (N/A)	Fungi	1	Ascomycota	1	Dothideomycetes	1	Incertae sedis 8	0.99	Incertae sedis 19	0.99	Scleroconidioma	0.99	Scleroconidioma sphagnicola	SH231448.06FU	0.99
HM122936	AZ0187	ARIZ:AZ0187	88	228	AZC	C3	Quercus rugosa	Angiospermae	Fagaceae	DLF	Sordariomycetes (N/A)	Fungi	1	Ascomycota	1	Sordariomycetes	0.99	NA	NA	NA	NA	NA	NA	NA	SH205984.06FU	0.99
HM122937	AZ0188	ARIZ:AZ0188	88	228	AZC	C3	Quercus rugosa	Angiospermae	Fagaceae	DLF	Sordariomycetes (N/A)	Fungi	1	Ascomycota	1	Sordariomycetes	0.99	NA	NA	NA	NA	NA	NA	NA	SH205984.06FU	0.99
HM122938	AZ0189	ARIZ:AZ0189	88	259	AZC	C3	Quercus rugosa	Angiospermae	Fagaceae	DLF	N/A	Fungi	1	Ascomycota	1	Sordariomycetes	0.98	NA	NA	NA	NA	NA	NA	NA	SH205985.06FU	1
HM122939	AZ0190	ARIZ:AZ0190	100	265	AZC	C3	Quercus rugosa	Angiospermae	Fagaceae	DLF	N/A	Fungi	1	Ascomycota	1	NA	NA	NA	NA	NA	NA	NA	NA	NA	SH224250.06FU	1
HM122940	AZ0191	ARIZ:AZ0191	89	266	AZC	C3	Quercus rugosa	Angiospermae	Fagaceae	DLF	N/A	Fungi	1	NA	NA	NA	NA	NA	NA	NA	NA	NA	NA	NA	NA	NA
HM122941	AZ0192	ARIZ:AZ0192	101	267	AZC	C3	Quercus rugosa	Angiospermae	Fagaceae	DLF	Sordariomycetes (Diaporthales)	Fungi	1	Ascomycota	1	Sordariomycetes	1	Diaporthales	0.92	Incertae sedis 20	0.86	Ophiognomonia	0.86	Ophiognomonia sogonovii	SH226094.06FU	0.86
HM122942	AZ0193	ARIZ:AZ0193	88	228	AZC	C3	Quercus rugosa	Angiospermae	Fagaceae	DLF	Sordariomycetes (N/A)	Fungi	1	Ascomycota	1	Sordariomycetes	0.98	NA	NA	NA	NA	NA	NA	NA	SH205984.06FU	0.98
HM122943	AZ0194	ARIZ:AZ0194	88	228	AZC	C3	Quercus rugosa	Angiospermae	Fagaceae	DLF	Sordariomycetes (N/A)	Fungi	1	Ascomycota	1	Sordariomycetes	0.97	NA	NA	NA	NA	NA	NA	NA	SH205984.06FU	0.97
HM122944	AZ0195	ARIZ:AZ0195	88	228	AZC	C3	Quercus rugosa	Angiospermae	Fagaceae	DLF	Sordariomycetes (N/A)	Fungi	1	Ascomycota	1	Sordariomycetes	0.99	NA	NA	NA	NA	NA	NA	NA	SH205984.06FU	0.99
HM122945	AZ0196	ARIZ:AZ0196	88	259	AZC	C3	Quercus rugosa	Angiospermae	Fagaceae	DLF	N/A	Fungi	1	Ascomycota	1	Sordariomycetes	0.98	NA	NA	NA	NA	NA	NA	NA	SH205985.06FU	1
HM122946	AZ0197	ARIZ:AZ0197	88	259	AZC	C3	Quercus rugosa	Angiospermae	Fagaceae	DLF	N/A	Fungi	1	Ascomycota	1	Sordariomycetes	0.98	NA	NA	NA	NA	NA	NA	NA	SH205985.06FU	1
HM122947	AZ0198	ARIZ:AZ0198	88	228	AZC	C3	Quercus rugosa	Angiospermae	Fagaceae	DLF	Sordariomycetes (N/A)	Fungi	1	Ascomycota	1	Sordariomycetes	0.99	NA	NA	NA	NA	NA	NA	NA	SH205984.06FU	0.99
HM122948	AZ0199	ARIZ:AZ0199	88	228	AZC	C3	Quercus rugosa	Angiospermae	Fagaceae	DLF	Sordariomycetes (N/A)	Fungi	1	Ascomycota	1	Sordariomycetes	0.99	NA	NA	NA	NA	NA	NA	NA	SH205984.06FU	0.99
HM122949	AZ0200	ARIZ:AZ0200	88	228	AZC	C3	Quercus rugosa	Angiospermae	Fagaceae	DLF	Sordariomycetes (N/A)	Fungi	1	Ascomycota	1	Sordariomycetes	0.99	NA	NA	NA	NA	NA	NA	NA	SH205984.06FU	0.99
HM122954	AZ0205	ARIZ:AZ0205	99	257	AZC	C3	Juniperus deppeana	Pinophyta	Cupressaceae	DLF	Leotiomycetes (Helotiales)	Fungi	1	Ascomycota	1	Leotiomycetes	1	Helotiales	1	NA	NA	NA	NA	NA	SH215666.06FU	1
HM122955	AZ0206	ARIZ:AZ0206	98	256	AZC	C3	Juniperus deppeana	Pinophyta	Cupressaceae	DLF	Dothideomycetes (N/A)	Fungi	1	Ascomycota	1	Dothideomycetes	1	NA	NA	NA	NA	NA	NA	NA	SH224127.06FU	1
HM122956	AZ0207	ARIZ:AZ0207	43	237	AZC	C3	Juniperus deppeana	Pinophyta	Cupressaceae	DLF	Sordariomycetes (Sordariales)	Fungi	1	Ascomycota	1	Sordariomycetes	1	Sordariales	1	Lasiosphaeriaceae	1	Fimetariella	1	Fimetariella sp	SH228797.06FU	1
HM122962	AZ0213	ARIZ:AZ0213	91	234	AZC	C1	Juniperus deppeana	Pinophyta	Cupressaceae	DLF	Sordariomycetes (N/A)	Fungi	1	Ascomycota	1	Sordariomycetes	1	NA	NA	NA	NA	NA	NA	NA	SH227121.06FU	1
HM122963	AZ0214	ARIZ:AZ0214	91	234	AZC	C1	Juniperus deppeana	Pinophyta	Cupressaceae	DLF	Sordariomycetes (N/A)	Fungi	1	Ascomycota	1	Sordariomycetes	1	NA	NA	NA	NA	NA	NA	NA	SH227121.06FU	1
HM122964	AZ0215A	ARIZ:AZ0215A	91	234	AZC	C1	Juniperus deppeana	Pinophyta	Cupressaceae	DLF	Sordariomycetes (N/A)	Fungi	1	Ascomycota	1	Sordariomycetes	1	NA	NA	NA	NA	NA	NA	NA	SH227121.06FU	1
HM122965	AZ0216	ARIZ:AZ0216	91	234	AZC	C1	Juniperus deppeana	Pinophyta	Cupressaceae	DLF	Sordariomycetes (N/A)	Fungi	1	Ascomycota	1	Sordariomycetes	1	NA	NA	NA	NA	NA	NA	NA	SH227121.06FU	1
HM122966	AZ0217	ARIZ:AZ0217	48	252	AZC	C3	Juniperus deppeana	Pinophyta	Cupressaceae	LLF	Sordariomycetes (Diaporthales)	Fungi	1	Ascomycota	1	Sordariomycetes	1	Diaporthales	1	Valsaceae	1	NA	NA	NA	SH211820.06FU	1
HM122967	AZ0219	ARIZ:AZ0219	59	264	AZC	C3	Juniperus deppeana	Pinophyta	Cupressaceae	LLF	Dothideomycetes (N/A)	Fungi	1	Ascomycota	1	Dothideomycetes	1	Incertae sedis 8	0.99	Incertae sedis 19	0.99	Scleroconidioma	0.99	Scleroconidioma sphagnicola	SH231448.06FU	0.99
HM122968	AZ0220	ARIZ:AZ0220	31	247	AZC	C1	Pseudotsuga menziesii	Pinophyta	Pinaceae	LLF	Dothideomycetes (Pleosporales)	Fungi	1	Ascomycota	1	Dothideomycetes	1	Pleosporales	1	Montagnulaceae	1	Paraconiothyrium	1	Paraconiothyrium hawaiiense	SH228689.06FU	0.85
HM122969	AZ0221	ARIZ:AZ0221	102	269	AZC	C1	Pseudotsuga menziesii	Pinophyta	Pinaceae	LLF	Pezizomycetes (N/A)	Fungi	1	Ascomycota	1	Pezizomycetes	1	NA	NA	NA	NA	NA	NA	NA	SH212258.06FU	1
HM122970	AZ0222	ARIZ:AZ0222	103	270	AZC	C3	Pseudotsuga menziesii	Pinophyta	Pinaceae	Endophyte	Sordariomycetes (Hypocreales)	Fungi	1	Ascomycota	1	Sordariomycetes	1	Hypocreales	1	Hypocreaceae	1	NA	NA	NA	NA	NA
HM122987	AZ0239	ARIZ:AZ0239	102	269	AZC	C3	Pseudotsuga menziesii	Pinophyta	Pinaceae	LLF	Pezizomycetes (N/A)	Fungi	1	Ascomycota	1	Pezizomycetes	1	NA	NA	NA	NA	NA	NA	NA	SH212258.06FU	1
HM122988	AZ0240	ARIZ:AZ0240	102	269	AZC	C3	Pseudotsuga menziesii	Pinophyta	Pinaceae	LLF	Pezizomycetes (N/A)	Fungi	1	Ascomycota	1	Pezizomycetes	1	NA	NA	NA	NA	NA	NA	NA	SH212258.06FU	1
HM122989	AZ0241	ARIZ:AZ0241	104	272	AZC	C3	Pseudotsuga menziesii	Pinophyta	Pinaceae	LLF	N/A	Fungi	1	NA	NA	NA	NA	NA	NA	NA	NA	NA	NA	NA	SH237687.06FU	1
HM122991	AZ0243	ARIZ:AZ0243	57	274	AZC	C3	Juniperus deppeana	Pinophyta	Cupressaceae	LLF	Dothideomycetes (Pleosporales)	Fungi	1	Ascomycota	1	Dothideomycetes	1	Pleosporales	0.94	Sporormiaceae	0.94	NA	NA	NA	SH190472.06FU	1
HM122992	AZ0244	ARIZ:AZ0244	48	275	AZC	C3	Juniperus deppeana	Pinophyta	Cupressaceae	LLF	Sordariomycetes (Diaporthales)	Fungi	1	Ascomycota	1	Sordariomycetes	1	Diaporthales	1	Valsaceae	1	NA	NA	NA	SH211784.06FU	0.85
HM122993	AZ0245	ARIZ:AZ0245	104	276	AZC	C3	Juniperus deppeana	Pinophyta	Cupressaceae	LLF	N/A	Fungi	1	NA	NA	NA	NA	NA	NA	NA	NA	NA	NA	NA	SH237688.06FU	1
HM122997	AZ0249	ARIZ:AZ0249	104	276	AZC	C1	Pseudotsuga menziesii	Pinophyta	Pinaceae	LLF	N/A	Fungi	1	NA	NA	NA	NA	NA	NA	NA	NA	NA	NA	NA	SH237688.06FU	1
HM123003	AZ0255	ARIZ:AZ0255	102	269	AZC	C3	Pseudotsuga menziesii	Pinophyta	Pinaceae	LLF	Pezizomycetes (N/A)	Fungi	1	Ascomycota	1	Pezizomycetes	1	NA	NA	NA	NA	NA	NA	NA	SH212258.06FU	1
HM123004	AZ0256	ARIZ:AZ0256	104	272	AZC	C3	Pseudotsuga menziesii	Pinophyta	Pinaceae	LLF	N/A	Fungi	1	NA	NA	NA	NA	NA	NA	NA	NA	NA	NA	NA	SH237687.06FU	1
HM123005	AZ0257	ARIZ:AZ0257	103	270	AZC	C3	Pseudotsuga menziesii	Pinophyta	Pinaceae	Endophyte	Sordariomycetes (Hypocreales)	Fungi	1	Ascomycota	1	Sordariomycetes	1	Hypocreales	1	Hypocreaceae	1	NA	NA	NA	NA	NA
HM123010	AZ0262	ARIZ:AZ0262	104	276	AZC	C1	Juniperus deppeana	Pinophyta	Cupressaceae	LLF	N/A	Fungi	1	NA	NA	NA	NA	NA	NA	NA	NA	NA	NA	NA	SH237688.06FU	1
HM123011	AZ0263	ARIZ:AZ0263	43	237	AZC	C1	Juniperus deppeana	Pinophyta	Cupressaceae	LLF	Sordariomycetes (Sordariales)	Fungi	1	Ascomycota	1	Sordariomycetes	1	Sordariales	1	Lasiosphaeriaceae	1	Fimetariella	1	Fimetariella sp	SH228797.06FU	1
HM123012	AZ0264	ARIZ:AZ0264	90	232	AZC	C1	Juniperus deppeana	Pinophyta	Cupressaceae	LLF	N/A	Fungi	1	NA	NA	NA	NA	NA	NA	NA	NA	NA	NA	NA	SH234093.06FU	1
HM123014	AZ0266	ARIZ:AZ0266	104	272	AZC	C3	Pseudotsuga menziesii	Pinophyta	Pinaceae	LLF	N/A	Fungi	1	NA	NA	NA	NA	NA	NA	NA	NA	NA	NA	NA	SH237687.06FU	1
HM123015	AZ0267	ARIZ:AZ0267	104	272	AZC	C3	Pseudotsuga menziesii	Pinophyta	Pinaceae	LLF	N/A	Fungi	1	NA	NA	NA	NA	NA	NA	NA	NA	NA	NA	NA	SH237687.06FU	1
HM123016	AZ0268	ARIZ:AZ0268	102	269	AZC	C3	Pseudotsuga menziesii	Pinophyta	Pinaceae	LLF	Pezizomycetes (N/A)	Fungi	1	Ascomycota	1	Pezizomycetes	1	NA	NA	NA	NA	NA	NA	NA	SH212258.06FU	1
HM123017	AZ0269	ARIZ:AZ0269	102	269	AZC	C3	Pseudotsuga menziesii	Pinophyta	Pinaceae	LLF	Pezizomycetes (N/A)	Fungi	1	Ascomycota	1	Pezizomycetes	1	NA	NA	NA	NA	NA	NA	NA	SH212258.06FU	1
HM123034	AZ0287A	ARIZ:AZ0287A	105	281	AZC	C2	Juniperus deppeana	Pinophyta	Cupressaceae	LLF	N/A	Fungi	1	NA	NA	NA	NA	NA	NA	NA	NA	NA	NA	NA	SH234093.06FU	1
HM123035	AZ0288A	ARIZ:AZ0288A	93	236	AZC	C2	Juniperus deppeana	Pinophyta	Cupressaceae	LLF	Pezizomycetes (Pezizales)	Fungi	1	Ascomycota	1	Pezizomycetes	1	Pezizales	1	Pyronemataceae	1	Micronematobotrys	1	Micronematobotrys sp	SH234092.06FU	1
HM123045	AZ0299	ARIZ:AZ0299	93	236	AZC	C2	Juniperus deppeana	Pinophyta	Cupressaceae	LLF	Pezizomycetes (Pezizales)	Fungi	1	Ascomycota	1	Pezizomycetes	1	Pezizales	1	Pyronemataceae	1	Micronematobotrys	1	Micronematobotrys sp	SH234092.06FU	1
HM123046	AZ0300	ARIZ:AZ0300	106	284	AZC	C2	Juniperus deppeana	Pinophyta	Cupressaceae	LLF	Dothideomycetes (Dothideales)	Fungi	1	Ascomycota	1	Dothideomycetes	1	Dothideales	1	Dothioraceae	1	Pringsheimia	1	Pringsheimia sp	SH231456.06FU	1
HM123067	AZ0322	ARIZ:AZ0322	48	287	AZC	C2	Juniperus deppeana	Pinophyta	Cupressaceae	Endophyte	Sordariomycetes (Diaporthales)	Fungi	1	Ascomycota	1	Sordariomycetes	1	Diaporthales	1	Valsaceae	1	NA	NA	NA	SH211820.06FU	1
HM123068	AZ0323	ARIZ:AZ0323	98	256	AZC	C2	Juniperus deppeana	Pinophyta	Cupressaceae	Endophyte	Dothideomycetes (N/A)	Fungi	1	Ascomycota	1	Dothideomycetes	1	NA	NA	NA	NA	NA	NA	NA	SH224127.06FU	1
HM123069	AZ0324	ARIZ:AZ0324	64	288	AZC	C2	Pseudotsuga menziesii	Pinophyta	Pinaceae	LLF	Dothideomycetes (Dothideales)	Fungi	1	Ascomycota	1	Dothideomycetes	1	Dothideales	1	NA	NA	NA	NA	NA	SH231470.06FU	1
HM123082	AZ0339	ARIZ:AZ0339	108	292	AZC	C2	Quercus rugosa	Angiospermae	Fagaceae	LLF	N/A	Fungi	1	Ascomycota	1	Incertae sedis 14	1	Incertae sedis 15	1	Incertae sedis 16	1	Polyscytalum	1	Polyscytalum sp	SH189863.06FU	1
HM123086	AZ0344	ARIZ:AZ0344	90	232	AZC	C1	Juniperus deppeana	Pinophyta	Cupressaceae	LLF	N/A	Fungi	1	NA	NA	NA	NA	NA	NA	NA	NA	NA	NA	NA	SH234093.06FU	1
HM123087	AZ0345	ARIZ:AZ0345	106	284	AZC	C1	Juniperus deppeana	Pinophyta	Cupressaceae	LLF	Dothideomycetes (Dothideales)	Fungi	1	Ascomycota	1	Dothideomycetes	1	Dothideales	1	Dothioraceae	1	Pringsheimia	1	Pringsheimia sp	SH231456.06FU	1
HM123090	AZ0348	ARIZ:AZ0348	98	256	AZC	C1	Juniperus deppeana	Pinophyta	Cupressaceae	Endophyte	Dothideomycetes (N/A)	Fungi	1	Ascomycota	1	Dothideomycetes	1	NA	NA	NA	NA	NA	NA	NA	SH224127.06FU	1
HM123091	AZ0349	ARIZ:AZ0349	21	30	AZC	C2	Juniperus deppeana	Pinophyta	Cupressaceae	Endophyte	Pezizomycetes (Pezizales)	Fungi	1	Ascomycota	1	Pezizomycetes	1	Pezizales	1	Pyronemataceae	1	Geopyxis	1	Geopyxis sp	SH229656.06FU	1
HM123092	AZ0350	ARIZ:AZ0350	90	232	AZC	C2	Juniperus deppeana	Pinophyta	Cupressaceae	Endophyte	N/A	Fungi	1	NA	NA	NA	NA	NA	NA	NA	NA	NA	NA	NA	SH234093.06FU	1
HM123107	AZ0366	ARIZ:AZ0366	95	293	AZC	C1	Pinus arizonica var. arizonica	Pinophyta	Pinaceae	DLF	Leotiomycetes (Rhytismatales)	Fungi	1	Ascomycota	1	Leotiomycetes	1	Rhytismatales	1	NA	NA	NA	NA	NA	SH240310.06FU	1
HM123108	AZ0367	ARIZ:AZ0367	95	245	AZC	C1	Pinus arizonica var. arizonica	Pinophyta	Pinaceae	DLF	Leotiomycetes (Rhytismatales)	Fungi	1	Ascomycota	1	Leotiomycetes	1	Rhytismatales	1	NA	NA	NA	NA	NA	SH240310.06FU	1
HM123109	AZ0369	ARIZ:AZ0369	38	294	AZC	C1	Pinus arizonica var. arizonica	Pinophyta	Pinaceae	DLF	Leotiomycetes (Helotiales)	Fungi	1	Ascomycota	0.99	Leotiomycetes	0.98	Helotiales	0.98	NA	NA	NA	NA	NA	SH235326.06FU	0.96
HM123110	AZ0370	ARIZ:AZ0370	53	230	AZC	C1	Pinus arizonica var. arizonica	Pinophyta	Pinaceae	DLF	Leotiomycetes (Helotiales)	Fungi	1	Ascomycota	1	Leotiomycetes	1	Helotiales	1	NA	NA	NA	NA	NA	SH209354.06FU	1
HM123115	AZ0375	ARIZ:AZ0375	53	230	AZC	C1	Pinus arizonica var. arizonica	Pinophyta	Pinaceae	LLF	Leotiomycetes (Helotiales)	Fungi	1	Ascomycota	1	Leotiomycetes	1	Helotiales	1	NA	NA	NA	NA	NA	SH209354.06FU	1
HM123116	AZ0376	ARIZ:AZ0376	95	245	AZC	C1	Pinus arizonica var. arizonica	Pinophyta	Pinaceae	LLF	Leotiomycetes (Rhytismatales)	Fungi	1	Ascomycota	1	Leotiomycetes	1	Rhytismatales	1	NA	NA	NA	NA	NA	SH240310.06FU	1
HM123131	AZ0392	ARIZ:AZ0392	88	228	AZC	C3	Quercus rugosa	Angiospermae	Fagaceae	DLF	Sordariomycetes (N/A)	Fungi	1	Ascomycota	1	Sordariomycetes	0.98	NA	NA	NA	NA	NA	NA	NA	SH205984.06FU	0.98
HM123140	AZ0404	ARIZ:AZ0404	99	257	AZC	C3	Juniperus deppeana	Pinophyta	Cupressaceae	DLF	Leotiomycetes (Helotiales)	Fungi	1	Ascomycota	1	Leotiomycetes	1	Helotiales	1	NA	NA	NA	NA	NA	SH215666.06FU	1
HM123141	AZ0405	ARIZ:AZ0405	106	284	AZC	C3	Juniperus deppeana	Pinophyta	Cupressaceae	DLF	Dothideomycetes (Dothideales)	Fungi	1	Ascomycota	1	Dothideomycetes	1	Dothideales	1	Dothioraceae	1	Pringsheimia	1	Pringsheimia sp	SH231456.06FU	1
HM123142	AZ0406	ARIZ:AZ0406	99	257	AZC	C3	Juniperus deppeana	Pinophyta	Cupressaceae	DLF	Leotiomycetes (Helotiales)	Fungi	1	Ascomycota	1	Leotiomycetes	1	Helotiales	1	NA	NA	NA	NA	NA	SH215666.06FU	1
HM123157	AZ0427	ARIZ:AZ0427	88	243	AZC	C1	Quercus rugosa	Angiospermae	Fagaceae	LLF	Sordariomycetes (N/A)	Fungi	1	Ascomycota	1	Sordariomycetes	1	NA	NA	NA	NA	NA	NA	NA	SH205984.06FU	1
HM123166	AZ0439	ARIZ:AZ0439	21	233	AZC	C1	Juniperus deppeana	Pinophyta	Cupressaceae	DLF	Pezizomycetes (Pezizales)	Fungi	1	Ascomycota	1	Pezizomycetes	1	Pezizales	1	Pyronemataceae	1	Geopyxis	1	Geopyxis sp	SH238101.06FU	1
HM123167	AZ0440	ARIZ:AZ0440	17	20	AZC	C1	Juniperus deppeana	Pinophyta	Cupressaceae	DLF	Pezizomycetes (Pezizales)	Fungi	1	Ascomycota	1	Pezizomycetes	1	Pezizales	1	Pyronemataceae	1	Trichophaea	1	Trichophaea hybrida	SH213181.06FU	1
HM123168	AZ0441	ARIZ:AZ0441	90	232	AZC	C1	Juniperus deppeana	Pinophyta	Cupressaceae	DLF	N/A	Fungi	1	NA	NA	NA	NA	NA	NA	NA	NA	NA	NA	NA	SH234093.06FU	1
HM123169	AZ0442	ARIZ:AZ0442	98	256	AZC	C1	Juniperus deppeana	Pinophyta	Cupressaceae	DLF	Dothideomycetes (N/A)	Fungi	1	Ascomycota	1	Dothideomycetes	1	NA	NA	NA	NA	NA	NA	NA	SH224127.06FU	1
HM123170	AZ0443A	ARIZ:AZ0443A	17	20	AZC	C1	Quercus rugosa	Angiospermae	Fagaceae	LLF	Pezizomycetes (Pezizales)	Fungi	1	Ascomycota	1	Pezizomycetes	1	Pezizales	1	Pyronemataceae	1	Trichophaea	1	Trichophaea hybrida	SH213181.06FU	1
HM123171	AZ0443B	ARIZ:AZ0443B	88	228	AZC	C1	Quercus rugosa	Angiospermae	Fagaceae	LLF	Sordariomycetes (N/A)	Fungi	1	Ascomycota	1	Sordariomycetes	0.99	NA	NA	NA	NA	NA	NA	NA	SH205984.06FU	0.99
HM123188	AZ0461	ARIZ:AZ0461	99	257	AZC	C3	Juniperus deppeana	Pinophyta	Cupressaceae	DLF	Leotiomycetes (Helotiales)	Fungi	1	Ascomycota	1	Leotiomycetes	1	Helotiales	1	NA	NA	NA	NA	NA	SH215666.06FU	1
HM123189	AZ0462	ARIZ:AZ0462	98	256	AZC	C3	Juniperus deppeana	Pinophyta	Cupressaceae	DLF	Dothideomycetes (N/A)	Fungi	1	Ascomycota	1	Dothideomycetes	1	NA	NA	NA	NA	NA	NA	NA	SH224127.06FU	1
HM123190	AZ0463	ARIZ:AZ0463	93	263	AZC	C2	Juniperus deppeana	Pinophyta	Cupressaceae	DLF	Pezizomycetes (Pezizales)	Fungi	1	Ascomycota	1	Pezizomycetes	1	Pezizales	1	Pyronemataceae	1	Micronematobotrys	1	Micronematobotrys sp	SH234092.06FU	1
HM123191	AZ04645	ARIZ:AZ04645	93	263	AZC	C2	Juniperus deppeana	Pinophyta	Cupressaceae	DLF	Pezizomycetes (Pezizales)	Fungi	1	Ascomycota	1	Pezizomycetes	1	Pezizales	1	Pyronemataceae	1	Micronematobotrys	1	Micronematobotrys sp	SH234092.06FU	1
HM123192	AZ0465	ARIZ:AZ0465	90	232	AZC	C2	Juniperus deppeana	Pinophyta	Cupressaceae	DLF	N/A	Fungi	1	NA	NA	NA	NA	NA	NA	NA	NA	NA	NA	NA	SH234093.06FU	1
HM123194	AZ0467	ARIZ:AZ0467	88	243	AZC	C2	Quercus rugosa	Angiospermae	Fagaceae	LLF	Sordariomycetes (N/A)	Fungi	1	Ascomycota	1	Sordariomycetes	1	NA	NA	NA	NA	NA	NA	NA	SH205984.06FU	1
HM123199	AZ0472	ARIZ:AZ0472	95	306	AZC	C1	Pinus arizonica var. arizonica	Pinophyta	Pinaceae	DLF	Leotiomycetes (Rhytismatales)	Fungi	1	Ascomycota	1	Leotiomycetes	1	Rhytismatales	1	NA	NA	NA	NA	NA	SH240310.06FU	1
HM123200	AZ0473	ARIZ:AZ0473	95	245	AZC	C1	Pinus arizonica var. arizonica	Pinophyta	Pinaceae	DLF	Leotiomycetes (Rhytismatales)	Fungi	1	Ascomycota	1	Leotiomycetes	1	Rhytismatales	1	NA	NA	NA	NA	NA	SH240310.06FU	1
HM123201	AZ0474	ARIZ:AZ0474	95	293	AZC	C1	Pinus arizonica var. arizonica	Pinophyta	Pinaceae	DLF	Leotiomycetes (Rhytismatales)	Fungi	1	Ascomycota	1	Leotiomycetes	1	Rhytismatales	1	NA	NA	NA	NA	NA	SH240310.06FU	1
HM123202	AZ0475	ARIZ:AZ0475	95	245	AZC	C1	Pinus arizonica var. arizonica	Pinophyta	Pinaceae	DLF	Leotiomycetes (Rhytismatales)	Fungi	1	Ascomycota	1	Leotiomycetes	1	Rhytismatales	1	NA	NA	NA	NA	NA	SH240310.06FU	1
HM123203	AZ0476	ARIZ:AZ0476	95	293	AZC	C1	Pinus arizonica var. arizonica	Pinophyta	Pinaceae	DLF	Leotiomycetes (Rhytismatales)	Fungi	1	Ascomycota	1	Leotiomycetes	1	Rhytismatales	1	NA	NA	NA	NA	NA	SH240310.06FU	1
HM123204	AZ0477	ARIZ:AZ0477	95	245	AZC	C1	Pinus arizonica var. arizonica	Pinophyta	Pinaceae	DLF	Leotiomycetes (Rhytismatales)	Fungi	1	Ascomycota	1	Leotiomycetes	1	Rhytismatales	1	NA	NA	NA	NA	NA	SH240310.06FU	1
HM123205	AZ0478	ARIZ:AZ0478	95	293	AZC	C1	Pinus arizonica var. arizonica	Pinophyta	Pinaceae	DLF	Leotiomycetes (Rhytismatales)	Fungi	1	Ascomycota	1	Leotiomycetes	1	Rhytismatales	1	NA	NA	NA	NA	NA	SH240310.06FU	1
HM123206	AZ0479	ARIZ:AZ0479	95	245	AZC	C1	Pinus arizonica var. arizonica	Pinophyta	Pinaceae	DLF	Leotiomycetes (Rhytismatales)	Fungi	1	Ascomycota	1	Leotiomycetes	1	Rhytismatales	1	NA	NA	NA	NA	NA	SH240310.06FU	1
HM123207	AZ0480	ARIZ:AZ0480	98	256	AZC	C3	Juniperus deppeana	Pinophyta	Cupressaceae	DLF	Dothideomycetes (N/A)	Fungi	1	Ascomycota	1	Dothideomycetes	1	NA	NA	NA	NA	NA	NA	NA	SH224127.06FU	1
HM123208	AZ0481	ARIZ:AZ0481	99	257	AZC	C3	Juniperus deppeana	Pinophyta	Cupressaceae	DLF	Leotiomycetes (Helotiales)	Fungi	1	Ascomycota	1	Leotiomycetes	1	Helotiales	1	NA	NA	NA	NA	NA	SH215666.06FU	1
HM123209	AZ0482	ARIZ:AZ0482	99	257	AZC	C3	Juniperus deppeana	Pinophyta	Cupressaceae	DLF	Leotiomycetes (Helotiales)	Fungi	1	Ascomycota	1	Leotiomycetes	1	Helotiales	1	NA	NA	NA	NA	NA	SH215666.06FU	1
HM123216	AZ0490	ARIZ:AZ0490	95	245	AZC	C1	Pinus arizonica var. arizonica	Pinophyta	Pinaceae	DLF	Leotiomycetes (Rhytismatales)	Fungi	1	Ascomycota	1	Leotiomycetes	1	Rhytismatales	1	NA	NA	NA	NA	NA	SH240310.06FU	1
HM123217	AZ0492	ARIZ:AZ0492	95	245	AZC	C1	Pinus arizonica var. arizonica	Pinophyta	Pinaceae	DLF	Leotiomycetes (Rhytismatales)	Fungi	1	Ascomycota	1	Leotiomycetes	1	Rhytismatales	1	NA	NA	NA	NA	NA	SH240310.06FU	1
HM123218	AZ0493	ARIZ:AZ0493	95	293	AZC	C1	Pinus arizonica var. arizonica	Pinophyta	Pinaceae	DLF	Leotiomycetes (Rhytismatales)	Fungi	1	Ascomycota	1	Leotiomycetes	1	Rhytismatales	1	NA	NA	NA	NA	NA	SH240310.06FU	1
HM123219	AZ0494	ARIZ:AZ0494	95	245	AZC	C1	Pinus arizonica var. arizonica	Pinophyta	Pinaceae	DLF	Leotiomycetes (Rhytismatales)	Fungi	1	Ascomycota	1	Leotiomycetes	1	Rhytismatales	1	NA	NA	NA	NA	NA	SH240310.06FU	1
HM123226	AZ0502	ARIZ:AZ0502	93	236	AZC	C2	Pseudotsuga menziesii	Pinophyta	Pinaceae	DLF	Pezizomycetes (Pezizales)	Fungi	1	Ascomycota	1	Pezizomycetes	1	Pezizales	1	Pyronemataceae	1	Micronematobotrys	1	Micronematobotrys sp	SH234092.06FU	1
HM123227	AZ0503	ARIZ:AZ0503	53	230	AZC	C1	Pinus arizonica var. arizonica	Pinophyta	Pinaceae	LLF	Leotiomycetes (Helotiales)	Fungi	1	Ascomycota	1	Leotiomycetes	1	Helotiales	1	NA	NA	NA	NA	NA	SH209354.06FU	1
HM123228	AZ0504	ARIZ:AZ0504	95	245	AZC	C1	Pinus arizonica var. arizonica	Pinophyta	Pinaceae	LLF	Leotiomycetes (Rhytismatales)	Fungi	1	Ascomycota	1	Leotiomycetes	1	Rhytismatales	1	NA	NA	NA	NA	NA	SH240310.06FU	1
HM123233	AZ0510	ARIZ:AZ0510	41	67	AZC	C1	Pinus arizonica var. arizonica	Pinophyta	Pinaceae	LLF	Dothideomycetes (Dothideales)	Fungi	1	Ascomycota	1	Dothideomycetes	1	Dothideales	0.99	Dothioraceae	0.99	NA	NA	NA	SH231446.06FU	0.99
HM123234	AZ0511	ARIZ:AZ0511	95	245	AZC	C1	Pinus arizonica var. arizonica	Pinophyta	Pinaceae	LLF	Leotiomycetes (Rhytismatales)	Fungi	1	Ascomycota	1	Leotiomycetes	1	Rhytismatales	1	NA	NA	NA	NA	NA	SH240310.06FU	1
HM123235	AZ0512	ARIZ:AZ0512	110	309	AZC	C1	Pinus arizonica var. arizonica	Pinophyta	Pinaceae	LLF	N/A	Fungi	1	Ascomycota	1	NA	NA	NA	NA	NA	NA	NA	NA	NA	SH209323.06FU	0.89
HM123236	AZ0514	ARIZ:AZ0514	61	310	AZC	C1	Pinus arizonica var. arizonica	Pinophyta	Pinaceae	LLF	Dothideomycetes (Pleosporales)	Fungi	1	Ascomycota	1	Dothideomycetes	1	Pleosporales	1	NA	NA	NA	NA	NA	SH194665.06FU	1
HM123242	AZ0520	ARIZ:AZ0520	99	257	AZC	C2	Juniperus deppeana	Pinophyta	Cupressaceae	LLF	Leotiomycetes (Helotiales)	Fungi	1	Ascomycota	1	Leotiomycetes	1	Helotiales	1	NA	NA	NA	NA	NA	SH215666.06FU	1
HM123243	AZ0521	ARIZ:AZ0521	98	256	AZC	C2	Juniperus deppeana	Pinophyta	Cupressaceae	LLF	Dothideomycetes (N/A)	Fungi	1	Ascomycota	1	Dothideomycetes	1	NA	NA	NA	NA	NA	NA	NA	SH224127.06FU	1
HM123254	AZ0532	ARIZ:AZ0532	88	228	AZC	C3	Quercus rugosa	Angiospermae	Fagaceae	DLF	Sordariomycetes (N/A)	Fungi	1	Ascomycota	1	Sordariomycetes	0.98	NA	NA	NA	NA	NA	NA	NA	SH205984.06FU	0.98
HM123255	AZ0533	ARIZ:AZ0533	88	259	AZC	C3	Quercus rugosa	Angiospermae	Fagaceae	DLF	N/A	Fungi	1	Ascomycota	1	Sordariomycetes	0.98	NA	NA	NA	NA	NA	NA	NA	SH205985.06FU	1
HM123256	AZ0534	ARIZ:AZ0534	96	315	AZC	C3	Quercus rugosa	Angiospermae	Fagaceae	DLF	Sordariomycetes (Diaporthales)	Fungi	1	Ascomycota	1	Sordariomycetes	1	Diaporthales	1	Gnomoniaceae	1	Gnomonia	1	Gnomoniopsis paraclavulata	SH129087.06FU	1
HM123257	AZ0535	ARIZ:AZ0535	88	259	AZC	C3	Quercus rugosa	Angiospermae	Fagaceae	DLF	N/A	Fungi	1	Ascomycota	1	Sordariomycetes	0.98	NA	NA	NA	NA	NA	NA	NA	SH205985.06FU	1
HM123263	AZ0542	ARIZ:AZ0542	95	245	AZC	C1	Pinus arizonica var. arizonica	Pinophyta	Pinaceae	LLF	Leotiomycetes (Rhytismatales)	Fungi	1	Ascomycota	1	Leotiomycetes	1	Rhytismatales	1	NA	NA	NA	NA	NA	SH240310.06FU	1
HM123264	AZ0543	ARIZ:AZ0543	61	316	AZC	C1	Pinus arizonica var. arizonica	Pinophyta	Pinaceae	LLF	N/A	Fungi	1	Ascomycota	0.97	Dothideomycetes	1	Pleosporales	1	NA	NA	NA	NA	NA	SH194645.06FU	0.93
HM123265	AZ0544	ARIZ:AZ0544	111	317	AZC	C1	Pinus arizonica var. arizonica	Pinophyta	Pinaceae	LLF	Leotiomycetes (N/A)	Fungi	1	Ascomycota	1	Leotiomycetes	1	NA	NA	NA	NA	NA	NA	NA	SH208255.06FU	1
HM123272	AZ0553	ARIZ:AZ0553	98	256	AZC	C1	Juniperus deppeana	Pinophyta	Cupressaceae	DLF	Dothideomycetes (N/A)	Fungi	1	Ascomycota	1	Dothideomycetes	1	NA	NA	NA	NA	NA	NA	NA	SH224127.06FU	1
HM123276	AZ0557	ARIZ:AZ0557	88	243	AZC	C2	Quercus rugosa	Angiospermae	Fagaceae	LLF	Sordariomycetes (N/A)	Fungi	1	Ascomycota	1	Sordariomycetes	1	NA	NA	NA	NA	NA	NA	NA	SH205984.06FU	1
HM123324	AZ0608	ARIZ:AZ0608	53	230	AZC	C2	Pinus arizonica var. arizonica	Pinophyta	Pinaceae	LLF	Leotiomycetes (Helotiales)	Fungi	1	Ascomycota	1	Leotiomycetes	1	Helotiales	1	NA	NA	NA	NA	NA	SH209354.06FU	1
HM123343	AZ0625A	ARIZ:AZ0625A	54	314	AZC	C3	Juniperus deppeana	Pinophyta	Cupressaceae	DLF	N/A	Fungi	1	Fungi unidentified	1	NA	NA	NA	NA	NA	NA	NA	NA	NA	SH197363.06FU	1
HM123344	AZ0626	ARIZ:AZ0626	52	296	AZC	C3	Juniperus deppeana	Pinophyta	Cupressaceae	DLF	Sordariomycetes (Xylariales)	Fungi	1	Ascomycota	1	Sordariomycetes	1	Xylariales	1	Xylariaceae	1	Nemania	1	Nemania sp	SH241717.06FU	1
HM123345	AZ0627	ARIZ:AZ0627	99	257	AZC	C3	Juniperus deppeana	Pinophyta	Cupressaceae	DLF	Leotiomycetes (Helotiales)	Fungi	1	Ascomycota	1	Leotiomycetes	1	Helotiales	1	NA	NA	NA	NA	NA	SH215666.06FU	1
HM123346	AZ0628	ARIZ:AZ0628	99	257	AZC	C3	Juniperus deppeana	Pinophyta	Cupressaceae	DLF	Leotiomycetes (Helotiales)	Fungi	1	Ascomycota	1	Leotiomycetes	1	Helotiales	1	NA	NA	NA	NA	NA	SH215666.06FU	1
HM123347	AZ0629	ARIZ:AZ0629	99	257	AZC	C3	Juniperus deppeana	Pinophyta	Cupressaceae	DLF	Leotiomycetes (Helotiales)	Fungi	1	Ascomycota	1	Leotiomycetes	1	Helotiales	1	NA	NA	NA	NA	NA	SH215666.06FU	1
HM123348	AZ0630	ARIZ:AZ0630	99	257	AZC	C3	Juniperus deppeana	Pinophyta	Cupressaceae	DLF	Leotiomycetes (Helotiales)	Fungi	1	Ascomycota	1	Leotiomycetes	1	Helotiales	1	NA	NA	NA	NA	NA	SH215666.06FU	1
HM123349	AZ0631	ARIZ:AZ0631	99	257	AZC	C3	Juniperus deppeana	Pinophyta	Cupressaceae	DLF	Leotiomycetes (Helotiales)	Fungi	1	Ascomycota	1	Leotiomycetes	1	Helotiales	1	NA	NA	NA	NA	NA	SH215666.06FU	1
HM123350	AZ0632	ARIZ:AZ0632	98	256	AZC	C2	Juniperus deppeana	Pinophyta	Cupressaceae	Endophyte	Dothideomycetes (N/A)	Fungi	1	Ascomycota	1	Dothideomycetes	1	NA	NA	NA	NA	NA	NA	NA	SH224127.06FU	1
HM123351	AZ0633	ARIZ:AZ0633	62	322	AZC	C2	Juniperus deppeana	Pinophyta	Cupressaceae	Endophyte	Sordariomycetes (Sordariales)	Fungi	1	Ascomycota	1	Sordariomycetes	1	Sordariales	1	Lasiosphaeriaceae	1	Fimetariella	1	Fimetariella sp	SH228797.06FU	1
HM123361	AZ0643	ARIZ:AZ0643	88	228	AZC	C3	Quercus rugosa	Angiospermae	Fagaceae	DLF	Sordariomycetes (N/A)	Fungi	1	Ascomycota	1	Sordariomycetes	0.99	NA	NA	NA	NA	NA	NA	NA	SH205984.06FU	0.99
HM123362	AZ0644	ARIZ:AZ0644	98	256	AZC	C3	Quercus rugosa	Angiospermae	Fagaceae	DLF	Dothideomycetes (N/A)	Fungi	1	Ascomycota	1	Dothideomycetes	1	NA	NA	NA	NA	NA	NA	NA	SH224127.06FU	1
HM123383	AZ0669	ARIZ:AZ0669	99	257	AZC	C3	Juniperus deppeana	Pinophyta	Cupressaceae	DLF	Leotiomycetes (Helotiales)	Fungi	1	Ascomycota	1	Leotiomycetes	1	Helotiales	1	NA	NA	NA	NA	NA	SH215666.06FU	1
HM123384	AZ0670	ARIZ:AZ0670	99	257	AZC	C3	Juniperus deppeana	Pinophyta	Cupressaceae	DLF	Leotiomycetes (Helotiales)	Fungi	1	Ascomycota	1	Leotiomycetes	1	Helotiales	1	NA	NA	NA	NA	NA	SH215666.06FU	1
HM123389	AZ0676A	ARIZ:AZ0676A	52	296	AZC	C2	Juniperus deppeana	Pinophyta	Cupressaceae	DLF	Sordariomycetes (Xylariales)	Fungi	1	Ascomycota	1	Sordariomycetes	1	Xylariales	1	Xylariaceae	1	Nemania	1	Nemania sp	SH241717.06FU	1
HM123390	AZ0676B	ARIZ:AZ0676B	113	327	AZC	C2	Juniperus deppeana	Pinophyta	Cupressaceae	DLF	N/A	Fungi	1	Ascomycota	1	NA	NA	NA	NA	NA	NA	NA	NA	NA	NA	NA
HM123399	AZ0685	ARIZ:AZ0685	95	293	AZC	C1	Pinus arizonica var. arizonica	Pinophyta	Pinaceae	DLF	Leotiomycetes (Rhytismatales)	Fungi	1	Ascomycota	1	Leotiomycetes	1	Rhytismatales	1	NA	NA	NA	NA	NA	SH240310.06FU	1
HM123400	AZ0686	ARIZ:AZ0686	95	293	AZC	C1	Pinus arizonica var. arizonica	Pinophyta	Pinaceae	DLF	Leotiomycetes (Rhytismatales)	Fungi	1	Ascomycota	1	Leotiomycetes	1	Rhytismatales	1	NA	NA	NA	NA	NA	SH240310.06FU	1
HM123404	AZ0691	ARIZ:AZ0691	95	245	AZC	C1	Pinus arizonica var. arizonica	Pinophyta	Pinaceae	LLF	Leotiomycetes (Rhytismatales)	Fungi	1	Ascomycota	1	Leotiomycetes	1	Rhytismatales	1	NA	NA	NA	NA	NA	SH240310.06FU	1
HM123405	AZ0692	ARIZ:AZ0692	61	316	AZC	C1	Pinus arizonica var. arizonica	Pinophyta	Pinaceae	LLF	N/A	Fungi	1	Ascomycota	0.89	Dothideomycetes	1	Pleosporales	1	NA	NA	NA	NA	NA	SH194645.06FU	0.88
HM123406	AZ0693	ARIZ:AZ0693	95	328	AZC	C1	Pinus arizonica var. arizonica	Pinophyta	Pinaceae	LLF	Leotiomycetes (Rhytismatales)	Fungi	1	Ascomycota	1	Leotiomycetes	1	Rhytismatales	1	NA	NA	NA	NA	NA	SH240310.06FU	1
HM123413	AZ0700	ARIZ:AZ0700	95	245	AZC	C1	Pinus arizonica var. arizonica	Pinophyta	Pinaceae	LLF	Leotiomycetes (Rhytismatales)	Fungi	1	Ascomycota	1	Leotiomycetes	1	Rhytismatales	1	NA	NA	NA	NA	NA	SH240310.06FU	1
HM123425	AZ0715	ARIZ:AZ0715	88	228	AZC	C1	Quercus rugosa	Angiospermae	Fagaceae	LLF	Sordariomycetes (N/A)	Fungi	1	Ascomycota	1	Sordariomycetes	0.99	NA	NA	NA	NA	NA	NA	NA	SH205984.06FU	0.99
HM123426	AZ0716	ARIZ:AZ0716	88	243	AZC	C2	Quercus rugosa	Angiospermae	Fagaceae	LLF	Sordariomycetes (N/A)	Fungi	1	Ascomycota	1	Sordariomycetes	1	NA	NA	NA	NA	NA	NA	NA	SH205984.06FU	1
HM123427	AZ0717	ARIZ:AZ0717	96	250	AZC	C2	Quercus rugosa	Angiospermae	Fagaceae	LLF	Sordariomycetes (Diaporthales)	Fungi	1	Ascomycota	1	Sordariomycetes	1	Diaporthales	1	Gnomoniaceae	1	Gnomonia	1	Gnomoniopsis paraclavulata	SH129087.06FU	1
HM123428	AZ0718	ARIZ:AZ0718	95	293	AZC	C1	Pinus arizonica var. arizonica	Pinophyta	Pinaceae	DLF	Leotiomycetes (Rhytismatales)	Fungi	1	Ascomycota	1	Leotiomycetes	1	Rhytismatales	1	NA	NA	NA	NA	NA	SH240310.06FU	1
HM123429	AZ0719	ARIZ:AZ0719	95	293	AZC	C1	Pinus arizonica var. arizonica	Pinophyta	Pinaceae	DLF	Leotiomycetes (Rhytismatales)	Fungi	1	Ascomycota	1	Leotiomycetes	1	Rhytismatales	1	NA	NA	NA	NA	NA	SH240310.06FU	1
HM123431	AZ0722	ARIZ:AZ0722	88	228	AZC	C3	Quercus rugosa	Angiospermae	Fagaceae	DLF	Sordariomycetes (N/A)	Fungi	1	Ascomycota	1	Sordariomycetes	0.98	NA	NA	NA	NA	NA	NA	NA	SH205984.06FU	0.98
HM123432	AZ0723	ARIZ:AZ0723	95	293	AZC	C1	Pinus arizonica var. arizonica	Pinophyta	Pinaceae	DLF	Leotiomycetes (Rhytismatales)	Fungi	1	Ascomycota	1	Leotiomycetes	1	Rhytismatales	1	NA	NA	NA	NA	NA	SH240310.06FU	1
HM123436	AZ0727	ARIZ:AZ0727	99	257	AZC	C3	Juniperus deppeana	Pinophyta	Cupressaceae	DLF	Leotiomycetes (Helotiales)	Fungi	1	Ascomycota	1	Leotiomycetes	1	Helotiales	1	NA	NA	NA	NA	NA	SH215666.06FU	1
HM123437	AZ0728	ARIZ:AZ0728	43	237	AZC	C3	Juniperus deppeana	Pinophyta	Cupressaceae	DLF	Sordariomycetes (Sordariales)	Fungi	1	Ascomycota	1	Sordariomycetes	1	Sordariales	1	Lasiosphaeriaceae	1	Fimetariella	1	Fimetariella sp	SH228797.06FU	1
HM123438	AZ0729	ARIZ:AZ0729	88	243	AZC	C2	Quercus rugosa	Angiospermae	Fagaceae	LLF	Sordariomycetes (N/A)	Fungi	1	Ascomycota	1	Sordariomycetes	1	NA	NA	NA	NA	NA	NA	NA	SH205984.06FU	1
HM123450	AZ0745	ARIZ:AZ0745	95	293	AZC	C3	Pinus arizonica var. arizonica	Pinophyta	Pinaceae	Endophyte	Leotiomycetes (Rhytismatales)	Fungi	1	Ascomycota	1	Leotiomycetes	1	Rhytismatales	1	NA	NA	NA	NA	NA	SH240310.06FU	1
HM123455	AZ0751	ARIZ:AZ0751	99	331	AZC	C2	Juniperus deppeana	Pinophyta	Cupressaceae	DLF	Leotiomycetes (Helotiales)	Fungi	1	Ascomycota	1	Leotiomycetes	1	Helotiales	1	NA	NA	NA	NA	NA	SH215666.06FU	1
HM123460	AZ0757	ARIZ:AZ0757	91	234	AZC	C1	Juniperus deppeana	Pinophyta	Cupressaceae	DLF	Sordariomycetes (N/A)	Fungi	1	Ascomycota	1	Sordariomycetes	1	NA	NA	NA	NA	NA	NA	NA	SH227121.06FU	1
HM123461	AZ0758	ARIZ:AZ0758	88	228	AZC	C1	Quercus rugosa	Angiospermae	Fagaceae	LLF	N/A	Fungi	1	Ascomycota	1	Sordariomycetes	0.98	NA	NA	NA	NA	NA	NA	NA	SH205984.06FU	1
HM123469	AZ0767	ARIZ:AZ0767	53	333	AZC	C1	Pinus arizonica var. arizonica	Pinophyta	Pinaceae	LLF	Leotiomycetes (Helotiales)	Fungi	1	Ascomycota	1	Leotiomycetes	1	Helotiales	1	NA	NA	NA	NA	NA	SH209354.06FU	1
HM123470	AZ0768	ARIZ:AZ0768	53	333	AZC	C1	Pinus arizonica var. arizonica	Pinophyta	Pinaceae	LLF	Leotiomycetes (Helotiales)	Fungi	1	Ascomycota	1	Leotiomycetes	1	Helotiales	1	NA	NA	NA	NA	NA	SH209354.06FU	1
HM123471	AZ0769	ARIZ:AZ0769	61	316	AZC	C1	Pinus arizonica var. arizonica	Pinophyta	Pinaceae	LLF	N/A	Fungi	1	Ascomycota	0.89	Dothideomycetes	1	Pleosporales	1	NA	NA	NA	NA	NA	SH194645.06FU	0.88
HM123472	AZ0770B	ARIZ:AZ0770B	111	317	AZC	C1	Pinus arizonica var. arizonica	Pinophyta	Pinaceae	LLF	Leotiomycetes (N/A)	Fungi	1	Ascomycota	1	Leotiomycetes	1	NA	NA	NA	NA	NA	NA	NA	SH208255.06FU	1
HM123473	AZ0771	ARIZ:AZ0771	95	245	AZC	C1	Pinus arizonica var. arizonica	Pinophyta	Pinaceae	DLF	Leotiomycetes (Rhytismatales)	Fungi	1	Ascomycota	1	Leotiomycetes	1	Rhytismatales	1	NA	NA	NA	NA	NA	SH240310.06FU	1
HM123474	AZ0772	ARIZ:AZ0772	95	245	AZC	C1	Pinus arizonica var. arizonica	Pinophyta	Pinaceae	DLF	Leotiomycetes (Rhytismatales)	Fungi	1	Ascomycota	1	Leotiomycetes	1	Rhytismatales	1	NA	NA	NA	NA	NA	SH240310.06FU	1
HM123475	AZ0773	ARIZ:AZ0773	95	293	AZC	C1	Pinus arizonica var. arizonica	Pinophyta	Pinaceae	DLF	Leotiomycetes (Rhytismatales)	Fungi	1	Ascomycota	1	Leotiomycetes	1	Rhytismatales	1	NA	NA	NA	NA	NA	SH240310.06FU	1
HM123476	AZ0774	ARIZ:AZ0774	95	245	AZC	C3	Pinus arizonica var. arizonica	Pinophyta	Pinaceae	DLF	Leotiomycetes (Rhytismatales)	Fungi	1	Ascomycota	1	Leotiomycetes	1	Rhytismatales	1	NA	NA	NA	NA	NA	SH240310.06FU	1
HM123491	AZ0794	ARIZ:AZ0794	98	256	AZC	C1	Juniperus deppeana	Pinophyta	Cupressaceae	LLF	Dothideomycetes (N/A)	Fungi	1	Ascomycota	1	Dothideomycetes	1	NA	NA	NA	NA	NA	NA	NA	SH224127.06FU	1
HM123494	AZ0797	ARIZ:AZ0797	95	245	AZC	C3	Pinus arizonica var. arizonica	Pinophyta	Pinaceae	DLF	Leotiomycetes (Rhytismatales)	Fungi	1	Ascomycota	1	Leotiomycetes	1	Rhytismatales	1	NA	NA	NA	NA	NA	SH240310.06FU	1
HM123495	AZ0798	ARIZ:AZ0798	114	334	AZC	C2	Pseudotsuga menziesii	Pinophyta	Pinaceae	DLF	Leotiomycetes (Helotiales)	Fungi	1	Ascomycota	1	Leotiomycetes	1	Helotiales	1	Hemiphacidiaceae	1	Rhabdocline	1	Rhabdocline sp	SH195553.06FU	1
HM123498	AZ0801	ARIZ:AZ0801	21	30	AZC	C2	Juniperus deppeana	Pinophyta	Cupressaceae	Endophyte	Pezizomycetes (Pezizales)	Fungi	1	Ascomycota	1	Pezizomycetes	1	Pezizales	1	Pyronemataceae	1	Geopyxis	1	Geopyxis sp	SH229656.06FU	1
HM123501	AZ0804	ARIZ:AZ0804	115	335	AZC	C2	Juniperus deppeana	Pinophyta	Cupressaceae	DLF	Sordariomycetes (Boliniales)	Fungi	1	Ascomycota	1	Sordariomycetes	0.96	Boliniales	0.92	Boliniaceae	0.92	NA	NA	NA	SH198082.06FU	0.86
HM123502	AZ0805	ARIZ:AZ0805	116	336	AZC	C2	Juniperus deppeana	Pinophyta	Cupressaceae	DLF	N/A	Fungi	1	Ascomycota	1	NA	NA	NA	NA	NA	NA	NA	NA	NA	SH241554.06FU	1
HM123516	AZ0825	ARIZ:AZ0825	114	334	AZC	C2	Pseudotsuga menziesii	Pinophyta	Pinaceae	DLF	Leotiomycetes (Helotiales)	Fungi	1	Ascomycota	1	Leotiomycetes	1	Helotiales	1	Hemiphacidiaceae	1	Rhabdocline	1	Rhabdocline sp	SH195553.06FU	1
HM123517	AZ0826	ARIZ:AZ0826	114	334	AZC	C2	Pseudotsuga menziesii	Pinophyta	Pinaceae	DLF	Leotiomycetes (Helotiales)	Fungi	1	Ascomycota	1	Leotiomycetes	1	Helotiales	1	Hemiphacidiaceae	1	Rhabdocline	1	Rhabdocline sp	SH195553.06FU	1
HM123523	AZ0834	ARIZ:AZ0834	116	336	AZC	C2	Juniperus deppeana	Pinophyta	Cupressaceae	DLF	N/A	Fungi	1	Ascomycota	1	NA	NA	NA	NA	NA	NA	NA	NA	NA	SH241554.06FU	1
HM123524	AZ0835	ARIZ:AZ0835	116	336	AZC	C2	Juniperus deppeana	Pinophyta	Cupressaceae	DLF	N/A	Fungi	1	Ascomycota	1	NA	NA	NA	NA	NA	NA	NA	NA	NA	SH241554.06FU	1
HM123525	AZ0836A	ARIZ:AZ0836A	96	250	AZC	C2	Quercus rugosa	Angiospermae	Fagaceae	LLF	Sordariomycetes (Diaporthales)	Fungi	1	Ascomycota	1	Sordariomycetes	1	Diaporthales	1	Gnomoniaceae	1	Gnomonia	1	Gnomoniopsis paraclavulata	SH129087.06FU	1
HM123530	AZ0841	ARIZ:AZ0841	21	30	AZC	C2	Juniperus deppeana	Pinophyta	Cupressaceae	LLF	Pezizomycetes (Pezizales)	Fungi	1	Ascomycota	1	Pezizomycetes	1	Pezizales	1	Pyronemataceae	1	Geopyxis	1	Geopyxis sp	SH229656.06FU	1
HM123532	AZ0843	ARIZ:AZ0843	53	343	AZC	C1	Pinus arizonica var. arizonica	Pinophyta	Pinaceae	LLF	N/A	Fungi	1	Ascomycota	0.63	Leotiomycetes	1	Helotiales	1	NA	NA	NA	NA	NA	NA	NA
HM123533	AZ0844	ARIZ:AZ0844	99	257	AZC	C1	Juniperus deppeana	Pinophyta	Cupressaceae	DLF	Leotiomycetes (Helotiales)	Fungi	1	Ascomycota	1	Leotiomycetes	1	Helotiales	1	NA	NA	NA	NA	NA	SH215666.06FU	1
HM123534	AZ0845	ARIZ:AZ0845	21	30	AZC	C1	Juniperus deppeana	Pinophyta	Cupressaceae	DLF	Pezizomycetes (Pezizales)	Fungi	1	Ascomycota	1	Pezizomycetes	1	Pezizales	1	Pyronemataceae	1	Geopyxis	1	Geopyxis sp	SH229656.06FU	1
HM123535	AZ0846	ARIZ:AZ0846	98	256	AZC	C1	Juniperus deppeana	Pinophyta	Cupressaceae	DLF	Dothideomycetes (N/A)	Fungi	1	Ascomycota	1	Dothideomycetes	1	NA	NA	NA	NA	NA	NA	NA	SH224127.06FU	1
HM123538	AZ0849	ARIZ:AZ0849	95	245	AZC	C3	Pinus arizonica var. arizonica	Pinophyta	Pinaceae	Endophyte	Leotiomycetes (Rhytismatales)	Fungi	1	Ascomycota	1	Leotiomycetes	1	Rhytismatales	1	NA	NA	NA	NA	NA	SH240310.06FU	1
HM123540	AZ0853	ARIZ:AZ0853	114	334	AZC	C1	Pseudotsuga menziesii	Pinophyta	Pinaceae	DLF	Leotiomycetes (Helotiales)	Fungi	1	Ascomycota	1	Leotiomycetes	1	Helotiales	1	Hemiphacidiaceae	1	Rhabdocline	1	Rhabdocline sp	SH195553.06FU	1
HM123542	AZ0855	ARIZ:AZ0855	99	257	AZC	C2	Juniperus deppeana	Pinophyta	Cupressaceae	Endophyte	Leotiomycetes (Helotiales)	Fungi	1	Ascomycota	1	Leotiomycetes	1	Helotiales	1	NA	NA	NA	NA	NA	SH215666.06FU	1
HM123543	AZ0856	ARIZ:AZ0856	119	344	AZC	C1	Juniperus deppeana	Pinophyta	Cupressaceae	LLF	Dothideomycetes (N/A)	Fungi	1	Ascomycota	1	Dothideomycetes	1	NA	NA	NA	NA	NA	NA	NA	SH231464.06FU	1
HM123544	AZ0857	ARIZ:AZ0857	120	345	AZC	C1	Juniperus deppeana	Pinophyta	Cupressaceae	LLF	Eurotiomycetes (Chaetothyriales)	Fungi	1	Ascomycota	1	Eurotiomycetes	1	Chaetothyriales	1	Herpotrichiellaceae	1	Phaeomoniella	1	Phaeomoniella sp DC2099	SH221994.06FU	1
HM123557	AZ0871	ARIZ:AZ0871	120	345	AZC	C2	Juniperus deppeana	Pinophyta	Cupressaceae	LLF	Eurotiomycetes (Chaetothyriales)	Fungi	1	Ascomycota	1	Eurotiomycetes	1	Chaetothyriales	1	Herpotrichiellaceae	1	Phaeomoniella	1	Phaeomoniella sp DC2099	SH221994.06FU	1
HM123558	AZ0873A	ARIZ:AZ0873A	120	345	AZC	C2	Juniperus deppeana	Pinophyta	Cupressaceae	LLF	Eurotiomycetes (Chaetothyriales)	Fungi	1	Ascomycota	1	Eurotiomycetes	1	Chaetothyriales	1	Herpotrichiellaceae	1	Phaeomoniella	1	Phaeomoniella sp DC2099	SH221994.06FU	1
HM123559	AZ0873B	ARIZ:AZ0873B	98	256	AZC	C2	Juniperus deppeana	Pinophyta	Cupressaceae	LLF	Dothideomycetes (N/A)	Fungi	1	Ascomycota	1	Dothideomycetes	1	NA	NA	NA	NA	NA	NA	NA	SH224127.06FU	1
HM123561	AZ0875A	ARIZ:AZ0875A	61	316	AZC	C1	Pinus arizonica var. arizonica	Pinophyta	Pinaceae	LLF	N/A	Fungi	1	Ascomycota	0.95	Dothideomycetes	1	Pleosporales	1	NA	NA	NA	NA	NA	SH194645.06FU	0.94
HM123562	AZ0876	ARIZ:AZ0876	61	316	AZC	C1	Pinus arizonica var. arizonica	Pinophyta	Pinaceae	LLF	N/A	Fungi	1	Ascomycota	0.9	Dothideomycetes	1	Pleosporales	1	NA	NA	NA	NA	NA	SH194645.06FU	0.88
HM123565	AZ0880	ARIZ:AZ0880	114	334	AZC	C2	Pseudotsuga menziesii	Pinophyta	Pinaceae	DLF	Leotiomycetes (Helotiales)	Fungi	1	Ascomycota	1	Leotiomycetes	1	Helotiales	1	Hemiphacidiaceae	1	Rhabdocline	1	Rhabdocline sp	SH195553.06FU	1
HM123570	AZ0887	ARIZ:AZ0887	120	348	AZC	C2	Juniperus deppeana	Pinophyta	Cupressaceae	LLF	Eurotiomycetes (Chaetothyriales)	Fungi	1	Ascomycota	1	Eurotiomycetes	1	Chaetothyriales	1	Herpotrichiellaceae	1	Phaeomoniella	1	Phaeomoniella sp	SH221995.06FU	1
HM123571	AZ0888	ARIZ:AZ0888	99	257	AZC	C2	Juniperus deppeana	Pinophyta	Cupressaceae	LLF	Leotiomycetes (Helotiales)	Fungi	1	Ascomycota	1	Leotiomycetes	1	Helotiales	1	NA	NA	NA	NA	NA	SH215666.06FU	1
HM123572	AZ0889	ARIZ:AZ0889	114	334	AZC	C2	Pseudotsuga menziesii	Pinophyta	Pinaceae	LLF	Leotiomycetes (Helotiales)	Fungi	1	Ascomycota	1	Leotiomycetes	1	Helotiales	1	Hemiphacidiaceae	1	Rhabdocline	1	Rhabdocline sp	SH195553.06FU	1
HM123573	AZ0890	ARIZ:AZ0890	121	349	AZC	C2	Pseudotsuga menziesii	Pinophyta	Pinaceae	LLF	Sordariomycetes (Xylariales)	Fungi	1	Ascomycota	1	Sordariomycetes	1	Xylariales	1	Xylariaceae	1	Anthostomella	1	Anthostomella pinea	SH212159.06FU	1
HM123574	AZ0892	ARIZ:AZ0892	114	334	AZC	C3	Pseudotsuga menziesii	Pinophyta	Pinaceae	Endophyte	Leotiomycetes (Helotiales)	Fungi	1	Ascomycota	1	Leotiomycetes	1	Helotiales	1	Hemiphacidiaceae	1	Rhabdocline	1	Rhabdocline sp	SH195553.06FU	1
HM123575	AZ0893	ARIZ:AZ0893	114	334	AZC	C3	Pseudotsuga menziesii	Pinophyta	Pinaceae	Endophyte	Leotiomycetes (Helotiales)	Fungi	1	Ascomycota	1	Leotiomycetes	1	Helotiales	1	Hemiphacidiaceae	1	Rhabdocline	1	Rhabdocline sp	SH195553.06FU	1
HM123576	AZ0894	ARIZ:AZ0894	114	334	AZC	C3	Pseudotsuga menziesii	Pinophyta	Pinaceae	Endophyte	Leotiomycetes (Helotiales)	Fungi	1	Ascomycota	1	Leotiomycetes	1	Helotiales	1	Hemiphacidiaceae	1	Rhabdocline	1	Rhabdocline sp	SH195553.06FU	1
HM123577	AZ0895	ARIZ:AZ0895	114	334	AZC	C3	Pseudotsuga menziesii	Pinophyta	Pinaceae	Endophyte	Leotiomycetes (Helotiales)	Fungi	1	Ascomycota	1	Leotiomycetes	1	Helotiales	1	Hemiphacidiaceae	1	Rhabdocline	1	Rhabdocline sp	SH195553.06FU	1
HM123578	AZ0897	ARIZ:AZ0897	114	334	AZC	C3	Pseudotsuga menziesii	Pinophyta	Pinaceae	Endophyte	Leotiomycetes (Helotiales)	Fungi	1	Ascomycota	1	Leotiomycetes	1	Helotiales	1	Hemiphacidiaceae	1	Rhabdocline	1	Rhabdocline sp	SH195553.06FU	1
HM123579	AZ0898	ARIZ:AZ0898	114	334	AZC	C3	Pseudotsuga menziesii	Pinophyta	Pinaceae	Endophyte	Leotiomycetes (Helotiales)	Fungi	1	Ascomycota	1	Leotiomycetes	1	Helotiales	1	Hemiphacidiaceae	1	Rhabdocline	1	Rhabdocline sp	SH195553.06FU	1
HM123580	AZ0899	ARIZ:AZ0899	114	334	AZC	C3	Pseudotsuga menziesii	Pinophyta	Pinaceae	Endophyte	Leotiomycetes (Helotiales)	Fungi	1	Ascomycota	1	Leotiomycetes	1	Helotiales	1	Hemiphacidiaceae	1	Rhabdocline	1	Rhabdocline sp	SH195553.06FU	1
HM123581	AZ0900	ARIZ:AZ0900	114	334	AZC	C3	Pseudotsuga menziesii	Pinophyta	Pinaceae	Endophyte	Leotiomycetes (Helotiales)	Fungi	1	Ascomycota	1	Leotiomycetes	1	Helotiales	1	Hemiphacidiaceae	1	Rhabdocline	1	Rhabdocline sp	SH195553.06FU	1
HM123582	AZ0901	ARIZ:AZ0901	114	334	AZC	C3	Pseudotsuga menziesii	Pinophyta	Pinaceae	Endophyte	Leotiomycetes (Helotiales)	Fungi	1	Ascomycota	1	Leotiomycetes	1	Helotiales	1	Hemiphacidiaceae	1	Rhabdocline	1	Rhabdocline sp	SH195553.06FU	1
HM123583	AZ0902	ARIZ:AZ0902	54	314	AZC	C3	Pseudotsuga menziesii	Pinophyta	Pinaceae	Endophyte	N/A	Fungi	1	Fungi unidentified	1	NA	NA	NA	NA	NA	NA	NA	NA	NA	SH197363.06FU	1
HM123584	AZ0903	ARIZ:AZ0903	114	334	AZC	C3	Pseudotsuga menziesii	Pinophyta	Pinaceae	Endophyte	Leotiomycetes (Helotiales)	Fungi	1	Ascomycota	1	Leotiomycetes	1	Helotiales	1	Hemiphacidiaceae	1	Rhabdocline	1	Rhabdocline sp	SH195553.06FU	1
HM123586	AZ0905	ARIZ:AZ0905	119	350	AZC	C2	Juniperus deppeana	Pinophyta	Cupressaceae	DLF	N/A	Fungi	1	Ascomycota	1	Dothideomycetes	1	NA	NA	NA	NA	NA	NA	NA	SH231458.06FU	1
HM123587	AZ0906	ARIZ:AZ0906	114	334	AZC	C1	Pseudotsuga menziesii	Pinophyta	Pinaceae	DLF	Leotiomycetes (Helotiales)	Fungi	1	Ascomycota	1	Leotiomycetes	1	Helotiales	1	Hemiphacidiaceae	1	Rhabdocline	1	Rhabdocline sp	SH195553.06FU	1
HM123601	AZ0923	ARIZ:AZ0923	95	293	AZC	C1	Pinus arizonica var. arizonica	Pinophyta	Pinaceae	DLF	Leotiomycetes (Rhytismatales)	Fungi	1	Ascomycota	1	Leotiomycetes	1	Rhytismatales	1	NA	NA	NA	NA	NA	SH240310.06FU	1
HM123606	AZ0929	ARIZ:AZ0929	119	350	AZC	C2	Juniperus deppeana	Pinophyta	Cupressaceae	DLF	N/A	Fungi	1	Ascomycota	1	Dothideomycetes	1	NA	NA	NA	NA	NA	NA	NA	SH231458.06FU	1
HM123607	AZ0930	ARIZ:AZ0930	114	334	AZC	C2	Pseudotsuga menziesii	Pinophyta	Pinaceae	DLF	Leotiomycetes (Helotiales)	Fungi	1	Ascomycota	1	Leotiomycetes	1	Helotiales	1	Hemiphacidiaceae	1	Rhabdocline	1	Rhabdocline sp	SH195553.06FU	1
HM123608	AZ0931	ARIZ:AZ0931	114	334	AZC	C3	Pseudotsuga menziesii	Pinophyta	Pinaceae	Endophyte	Leotiomycetes (Helotiales)	Fungi	1	Ascomycota	1	Leotiomycetes	1	Helotiales	1	Hemiphacidiaceae	1	Rhabdocline	1	Rhabdocline sp	SH195553.06FU	1
HM123609	AZ0932B	ARIZ:AZ0932B	7	8	AZC	C2	Pseudotsuga menziesii	Pinophyta	Pinaceae	LLF	Sordariomycetes (N/A)	Fungi	1	Ascomycota	1	Sordariomycetes	1	NA	NA	NA	NA	NA	NA	NA	SH234917.06FU	0.98
HM123610	AZ0933	ARIZ:AZ0933	119	350	AZC	C2	Juniperus deppeana	Pinophyta	Cupressaceae	DLF	N/A	Fungi	1	Ascomycota	1	Dothideomycetes	1	NA	NA	NA	NA	NA	NA	NA	SH231458.06FU	1
HM123611	AZ0934	ARIZ:AZ0934	123	353	AZC	C2	Juniperus deppeana	Pinophyta	Cupressaceae	DLF	Eurotiomycetes (Chaetothyriales)	Fungi	1	Ascomycota	0.98	Eurotiomycetes	0.96	Chaetothyriales	0.93	Herpotrichiellaceae	0.92	Cladophialophora	0.91	Cladophialophora sp	SH228298.06FU	0.91
HM123612	AZ0935	ARIZ:AZ0935	124	354	AZC	C1	Pinus arizonica var. arizonica	Pinophyta	Pinaceae	Endophyte	Pezizomycetes (Pezizales)	Fungi	1	Ascomycota	0.98	Pezizomycetes	0.88	Pezizales	0.84	NA	NA	NA	NA	NA	NA	NA
HM123613	AZ0936	ARIZ:AZ0936	61	316	AZC	C2	Pinus arizonica var. arizonica	Pinophyta	Pinaceae	LLF	N/A	Fungi	1	Ascomycota	0.93	Dothideomycetes	1	Pleosporales	1	NA	NA	NA	NA	NA	SH194645.06FU	0.91
HM123618	AZ0941	ARIZ:AZ0941	114	334	AZC	C1	Pseudotsuga menziesii	Pinophyta	Pinaceae	LLF	Leotiomycetes (Helotiales)	Fungi	1	Ascomycota	1	Leotiomycetes	1	Helotiales	1	Hemiphacidiaceae	1	Rhabdocline	1	Rhabdocline sp	SH195553.06FU	1
HM123621	AZ0945	ARIZ:AZ0945	114	334	AZC	C1	Pseudotsuga menziesii	Pinophyta	Pinaceae	LLF	Leotiomycetes (Helotiales)	Fungi	1	Ascomycota	1	Leotiomycetes	1	Helotiales	1	Hemiphacidiaceae	1	Rhabdocline	1	Rhabdocline sp	SH195553.06FU	1
HM123622	AZ0949	ARIZ:AZ0949	99	257	AZC	C3	Juniperus deppeana	Pinophyta	Cupressaceae	LLF	Leotiomycetes (Helotiales)	Fungi	1	Ascomycota	1	Leotiomycetes	1	Helotiales	1	NA	NA	NA	NA	NA	SH215666.06FU	1
HM123623	AZ0950	ARIZ:AZ0950	114	334	AZC	C1	Pseudotsuga menziesii	Pinophyta	Pinaceae	DLF	Leotiomycetes (Helotiales)	Fungi	1	Ascomycota	1	Leotiomycetes	1	Helotiales	1	Hemiphacidiaceae	1	Rhabdocline	1	Rhabdocline sp	SH195553.06FU	1
HM123624	AZ0952	ARIZ:AZ0952	120	345	AZC	C1	Juniperus deppeana	Pinophyta	Cupressaceae	LLF	Eurotiomycetes (Chaetothyriales)	Fungi	1	Ascomycota	1	Eurotiomycetes	1	Chaetothyriales	1	Herpotrichiellaceae	1	Phaeomoniella	1	Phaeomoniella sp DC2099	SH221994.06FU	1
HM123625	AZ0953	ARIZ:AZ0953	114	334	AZC	C2	Pseudotsuga menziesii	Pinophyta	Pinaceae	Endophyte	Leotiomycetes (Helotiales)	Fungi	1	Ascomycota	1	Leotiomycetes	1	Helotiales	1	Hemiphacidiaceae	1	Rhabdocline	1	Rhabdocline sp	SH195553.06FU	1
HM123627	AZ0956	ARIZ:AZ0956	61	357	AZC	C1	Pinus arizonica var. arizonica	Pinophyta	Pinaceae	LLF	N/A	Fungi	1	Ascomycota	0.82	Dothideomycetes	1	Pleosporales	1	NA	NA	NA	NA	NA	NA	NA
HM123628	AZ0957	ARIZ:AZ0957	116	336	AZC	C3	Juniperus deppeana	Pinophyta	Cupressaceae	DLF	N/A	Fungi	1	Ascomycota	1	NA	NA	NA	NA	NA	NA	NA	NA	NA	SH241554.06FU	1
HM123629	AZ0958	ARIZ:AZ0958	119	350	AZC	C3	Juniperus deppeana	Pinophyta	Cupressaceae	DLF	N/A	Fungi	1	Ascomycota	1	Dothideomycetes	1	NA	NA	NA	NA	NA	NA	NA	SH231458.06FU	1
HM123630	AZ0959	ARIZ:AZ0959	99	257	AZC	C3	Juniperus deppeana	Pinophyta	Cupressaceae	DLF	Leotiomycetes (Helotiales)	Fungi	1	Ascomycota	1	Leotiomycetes	1	Helotiales	1	NA	NA	NA	NA	NA	SH215666.06FU	1
HM123631	AZ0960	ARIZ:AZ0960	88	259	AZC	C2	Quercus rugosa	Angiospermae	Fagaceae	LLF	N/A	Fungi	1	Ascomycota	1	Sordariomycetes	0.98	NA	NA	NA	NA	NA	NA	NA	SH205985.06FU	1
HM123632	AZ0961	ARIZ:AZ0961	88	259	AZC	C2	Quercus rugosa	Angiospermae	Fagaceae	LLF	N/A	Fungi	1	Ascomycota	1	Sordariomycetes	0.98	NA	NA	NA	NA	NA	NA	NA	SH205985.06FU	1
HM123633	AZ0963	ARIZ:AZ0963	120	348	AZC	C3	Juniperus deppeana	Pinophyta	Cupressaceae	Endophyte	Eurotiomycetes (Chaetothyriales)	Fungi	1	Ascomycota	1	Eurotiomycetes	1	Chaetothyriales	1	Herpotrichiellaceae	1	Phaeomoniella	1	Phaeomoniella sp	SH221995.06FU	1
HM123640	AZ0972	ARIZ:AZ0972	99	257	AZC	C2	Juniperus deppeana	Pinophyta	Cupressaceae	DLF	Leotiomycetes (Helotiales)	Fungi	1	Ascomycota	1	Leotiomycetes	1	Helotiales	1	NA	NA	NA	NA	NA	SH215666.06FU	1
HM123642	AZ0975	ARIZ:AZ0975	114	334	AZC	C2	Pseudotsuga menziesii	Pinophyta	Pinaceae	DLF	Leotiomycetes (Helotiales)	Fungi	1	Ascomycota	1	Leotiomycetes	1	Helotiales	1	Hemiphacidiaceae	1	Rhabdocline	1	Rhabdocline sp	SH195553.06FU	1
HM123643	AZ0976	ARIZ:AZ0976	99	257	AZC	C2	Juniperus deppeana	Pinophyta	Cupressaceae	LLF	Leotiomycetes (Helotiales)	Fungi	1	Ascomycota	1	Leotiomycetes	1	Helotiales	1	NA	NA	NA	NA	NA	SH215666.06FU	1
HM123645	AZ0978	ARIZ:AZ0978	88	259	AZC	C3	Quercus rugosa	Angiospermae	Fagaceae	DLF	N/A	Fungi	1	Ascomycota	1	Sordariomycetes	0.98	NA	NA	NA	NA	NA	NA	NA	SH205985.06FU	1
HM123646	AZ0979	ARIZ:AZ0979	95	245	AZC	C1	Pinus arizonica var. arizonica	Pinophyta	Pinaceae	DLF	Leotiomycetes (Rhytismatales)	Fungi	1	Ascomycota	1	Leotiomycetes	1	Rhytismatales	1	NA	NA	NA	NA	NA	SH240310.06FU	1
HM123651	AZ0988	ARIZ:AZ0988	120	345	AZC	C3	Juniperus deppeana	Pinophyta	Cupressaceae	DLF	Eurotiomycetes (Chaetothyriales)	Fungi	1	Ascomycota	1	Eurotiomycetes	1	Chaetothyriales	1	Herpotrichiellaceae	1	Phaeomoniella	1	Phaeomoniella sp DC2099	SH221994.06FU	1
HM123652	AZ0989	ARIZ:AZ0989	120	345	AZC	C1	Juniperus deppeana	Pinophyta	Cupressaceae	DLF	Eurotiomycetes (Chaetothyriales)	Fungi	1	Ascomycota	1	Eurotiomycetes	1	Chaetothyriales	1	Herpotrichiellaceae	1	Phaeomoniella	1	Phaeomoniella sp DC2099	SH221994.06FU	1
HM123654	AZ0993	ARIZ:AZ0993	120	345	AZC	C2	Juniperus deppeana	Pinophyta	Cupressaceae	DLF	Eurotiomycetes (Chaetothyriales)	Fungi	1	Ascomycota	1	Eurotiomycetes	1	Chaetothyriales	1	Herpotrichiellaceae	1	Phaeomoniella	1	Phaeomoniella sp DC2099	SH221994.06FU	1
HM123655	AZ0995	ARIZ:AZ0995	114	334	AZC	C3	Pseudotsuga menziesii	Pinophyta	Pinaceae	Endophyte	Leotiomycetes (Helotiales)	Fungi	1	Ascomycota	1	Leotiomycetes	1	Helotiales	1	Hemiphacidiaceae	1	Rhabdocline	1	Rhabdocline sp	SH195553.06FU	1
HM123659	AZ0999	ARIZ:AZ0999	114	334	AZC	C2	Pseudotsuga menziesii	Pinophyta	Pinaceae	DLF	Leotiomycetes (Helotiales)	Fungi	1	Ascomycota	1	Leotiomycetes	1	Helotiales	1	Hemiphacidiaceae	1	Rhabdocline	1	Rhabdocline sp	SH195553.06FU	1
HM123660	AZ1000	ARIZ:AZ1000	114	334	AZC	C2	Pseudotsuga menziesii	Pinophyta	Pinaceae	DLF	Leotiomycetes (Helotiales)	Fungi	1	Ascomycota	1	Leotiomycetes	1	Helotiales	1	Hemiphacidiaceae	1	Rhabdocline	1	Rhabdocline sp	SH195553.06FU	1
HM123661	AZ1002	ARIZ:AZ1002	119	344	AZC	C3	Juniperus deppeana	Pinophyta	Cupressaceae	Endophyte	Dothideomycetes (N/A)	Fungi	1	Ascomycota	1	Dothideomycetes	1	NA	NA	NA	NA	NA	NA	NA	SH231464.06FU	1
HM123664	AZ1005	ARIZ:AZ1005	119	359	AZC	C2	Juniperus deppeana	Pinophyta	Cupressaceae	LLF	Dothideomycetes (N/A)	Fungi	1	Ascomycota	0.98	Dothideomycetes	0.98	NA	NA	NA	NA	NA	NA	NA	SH231465.06FU	0.8
HM123668	AZ1009	ARIZ:AZ1009	95	245	AZC	C3	Pinus arizonica var. arizonica	Pinophyta	Pinaceae	Endophyte	Leotiomycetes (Rhytismatales)	Fungi	1	Ascomycota	1	Leotiomycetes	1	Rhytismatales	1	NA	NA	NA	NA	NA	SH240310.06FU	1
HM123669	AZ1010	ARIZ:AZ1010	119	350	AZC	C2	Juniperus deppeana	Pinophyta	Cupressaceae	DLF	N/A	Fungi	1	Ascomycota	1	Dothideomycetes	1	NA	NA	NA	NA	NA	NA	NA	SH231458.06FU	1
HM123670	AZ1011	ARIZ:AZ1011	114	334	AZC	C2	Pseudotsuga menziesii	Pinophyta	Pinaceae	DLF	Leotiomycetes (Helotiales)	Fungi	1	Ascomycota	1	Leotiomycetes	1	Helotiales	1	Hemiphacidiaceae	1	Rhabdocline	1	Rhabdocline sp	SH195553.06FU	1
HM123671	AZ1012	ARIZ:AZ1012	114	334	AZC	C1	Pseudotsuga menziesii	Pinophyta	Pinaceae	LLF	Leotiomycetes (Helotiales)	Fungi	1	Ascomycota	1	Leotiomycetes	1	Helotiales	1	Hemiphacidiaceae	1	Rhabdocline	1	Rhabdocline sp	SH195553.06FU	1
HM123675	AZ1016	ARIZ:AZ1016	125	361	AZC	C2	Pseudotsuga menziesii	Pinophyta	Pinaceae	LLF	Dothideomycetes (Capnodiales)	Fungi	1	Ascomycota	1	Dothideomycetes	1	Capnodiales	1	Mycosphaerellaceae	1	Phaeothecoidea	1	Phaeothecoidea proteae	SH238978.06FU	0.95
HM123676	AZ1018	ARIZ:AZ1018	61	357	AZC	C1	Pinus arizonica var. arizonica	Pinophyta	Pinaceae	LLF	N/A	Fungi	1	Ascomycota	0.71	Dothideomycetes	1	Pleosporales	1	NA	NA	NA	NA	NA	NA	NA
HM123678	AZ1022	ARIZ:AZ1022	114	334	AZC	C1	Pseudotsuga menziesii	Pinophyta	Pinaceae	LLF	Leotiomycetes (Helotiales)	Fungi	1	Ascomycota	1	Leotiomycetes	1	Helotiales	1	Hemiphacidiaceae	1	Rhabdocline	1	Rhabdocline sp	SH195553.06FU	1
HM123679	AZ1023	ARIZ:AZ1023	114	334	AZC	C1	Pseudotsuga menziesii	Pinophyta	Pinaceae	DLF	Leotiomycetes (Helotiales)	Fungi	1	Ascomycota	1	Leotiomycetes	1	Helotiales	1	Hemiphacidiaceae	1	Rhabdocline	1	Rhabdocline sp	SH195553.06FU	1
HM123680	AZ1024	ARIZ:AZ1024	126	362	AZC	C3	Quercus rugosa	Angiospermae	Fagaceae	DLF	Dothideomycetes (Pleosporales)	Fungi	1	Ascomycota	1	Dothideomycetes	1	Pleosporales	1	Venturiaceae 1	1	NA	NA	NA	NA	NA
HM123681	AZ1025	ARIZ:AZ1025	119	350	AZC	C2	Juniperus deppeana	Pinophyta	Cupressaceae	DLF	N/A	Fungi	1	Ascomycota	1	Dothideomycetes	1	NA	NA	NA	NA	NA	NA	NA	SH231458.06FU	1
HM123682	AZ1026	ARIZ:AZ1026	119	350	AZC	C2	Juniperus deppeana	Pinophyta	Cupressaceae	DLF	N/A	Fungi	1	Ascomycota	1	Dothideomycetes	1	NA	NA	NA	NA	NA	NA	NA	SH231458.06FU	1
HM123683	AZ1029	ARIZ:AZ1029	125	363	AZC	C3	Pseudotsuga menziesii	Pinophyta	Pinaceae	LLF	Dothideomycetes (Capnodiales)	Fungi	1	Ascomycota	1	Dothideomycetes	1	Capnodiales	1	Mycosphaerellaceae	1	Phaeothecoidea	1	Phaeothecoidea proteae	SH195097.06FU	1
HM123684	AZ1030	ARIZ:AZ1030	114	334	AZC	C2	Pseudotsuga menziesii	Pinophyta	Pinaceae	LLF	Leotiomycetes (Helotiales)	Fungi	1	Ascomycota	1	Leotiomycetes	1	Helotiales	1	Hemiphacidiaceae	1	Rhabdocline	1	Rhabdocline sp	SH195553.06FU	1
HM123686	AZ1033	ARIZ:AZ1033	114	334	AZC	C1	Pseudotsuga menziesii	Pinophyta	Pinaceae	DLF	Leotiomycetes (Helotiales)	Fungi	1	Ascomycota	1	Leotiomycetes	1	Helotiales	1	Hemiphacidiaceae	1	Rhabdocline	1	Rhabdocline sp	SH195553.06FU	1
HM123687	AZ1034	ARIZ:AZ1034	88	259	AZC	C1	Quercus rugosa	Angiospermae	Fagaceae	DLF	N/A	Fungi	1	Ascomycota	1	Sordariomycetes	0.98	NA	NA	NA	NA	NA	NA	NA	SH205985.06FU	1
HM123688	AZ1035	ARIZ:AZ1035	114	334	AZC	C1	Pseudotsuga menziesii	Pinophyta	Pinaceae	LLF	Leotiomycetes (Helotiales)	Fungi	1	Ascomycota	1	Leotiomycetes	1	Helotiales	1	Hemiphacidiaceae	1	Rhabdocline	1	Rhabdocline sp	SH195553.06FU	1
HM123690	AZ1040	ARIZ:AZ1040	114	334	AZC	C1	Pseudotsuga menziesii	Pinophyta	Pinaceae	DLF	Leotiomycetes (Helotiales)	Fungi	1	Ascomycota	1	Leotiomycetes	1	Helotiales	1	Hemiphacidiaceae	1	Rhabdocline	1	Rhabdocline sp	SH195553.06FU	1
HM123691	AZ1042	ARIZ:AZ1042	116	336	AZC	C2	Juniperus deppeana	Pinophyta	Cupressaceae	DLF	N/A	Fungi	1	Ascomycota	1	NA	NA	NA	NA	NA	NA	NA	NA	NA	SH241554.06FU	1
HM123695	AZ1049	ARIZ:AZ1049	114	334	AZC	C1	Pseudotsuga menziesii	Pinophyta	Pinaceae	DLF	Leotiomycetes (Helotiales)	Fungi	1	Ascomycota	1	Leotiomycetes	1	Helotiales	1	Hemiphacidiaceae	1	Rhabdocline	1	Rhabdocline sp	SH195553.06FU	1
HM123696	AZ1050	ARIZ:AZ1050	95	293	AZC	C1	Pinus arizonica var. arizonica	Pinophyta	Pinaceae	Endophyte	Leotiomycetes (Rhytismatales)	Fungi	1	Ascomycota	1	Leotiomycetes	1	Rhytismatales	1	NA	NA	NA	NA	NA	SH240310.06FU	1
HM123698	AZ1053	ARIZ:AZ1053	99	257	AZC	C3	Juniperus deppeana	Pinophyta	Cupressaceae	Endophyte	Leotiomycetes (Helotiales)	Fungi	1	Ascomycota	1	Leotiomycetes	1	Helotiales	1	NA	NA	NA	NA	NA	SH215666.06FU	1
HM123699	AZ1054	ARIZ:AZ1054	114	334	AZC	C2	Pseudotsuga menziesii	Pinophyta	Pinaceae	DLF	Leotiomycetes (Helotiales)	Fungi	1	Ascomycota	1	Leotiomycetes	1	Helotiales	1	Hemiphacidiaceae	1	Rhabdocline	1	Rhabdocline sp	SH195553.06FU	1
HM123701	AZ1056	ARIZ:AZ1056	99	257	AZC	C3	Juniperus deppeana	Pinophyta	Cupressaceae	Endophyte	Leotiomycetes (Helotiales)	Fungi	1	Ascomycota	1	Leotiomycetes	1	Helotiales	1	NA	NA	NA	NA	NA	SH215666.06FU	1
HM123702	AZ1057	ARIZ:AZ1057	128	368	AZC	C3	Juniperus deppeana	Pinophyta	Cupressaceae	Endophyte	Eurotiomycetes (Chaetothyriales)	Fungi	1	Ascomycota	1	Eurotiomycetes	0.87	Chaetothyriales	0.83	NA	NA	NA	NA	NA	NA	NA
HM123703	AZ1058	ARIZ:AZ1058	108	292	AZC	C2	Quercus rugosa	Angiospermae	Fagaceae	LLF	N/A	Fungi	1	Ascomycota	1	Incertae sedis 14	1	Incertae sedis 15	1	Incertae sedis 16	1	Polyscytalum	1	Polyscytalum sp	SH189863.06FU	1
HM123704	AZ1059	ARIZ:AZ1059	95	293	AZC	C2	Pinus arizonica var. arizonica	Pinophyta	Pinaceae	Endophyte	Leotiomycetes (Rhytismatales)	Fungi	1	Ascomycota	1	Leotiomycetes	1	Rhytismatales	1	NA	NA	NA	NA	NA	SH240310.06FU	1
HM123706	AZ1062	ARIZ:AZ1062	99	257	AZC	C3	Juniperus deppeana	Pinophyta	Cupressaceae	Endophyte	Leotiomycetes (Helotiales)	Fungi	1	Ascomycota	1	Leotiomycetes	1	Helotiales	1	NA	NA	NA	NA	NA	SH215666.06FU	1
HM123708	AZ1064	ARIZ:AZ1064	61	316	AZC	C2	Pinus arizonica var. arizonica	Pinophyta	Pinaceae	LLF	N/A	Fungi	1	Ascomycota	0.86	Dothideomycetes	1	Pleosporales	1	NA	NA	NA	NA	NA	SH194645.06FU	0.86
HM123710	AZ1066	ARIZ:AZ1066	95	293	AZC	C3	Pinus arizonica var. arizonica	Pinophyta	Pinaceae	Endophyte	Leotiomycetes (Rhytismatales)	Fungi	1	Ascomycota	1	Leotiomycetes	1	Rhytismatales	1	NA	NA	NA	NA	NA	SH240310.06FU	1
HM123711	AZ1067	ARIZ:AZ1067	99	257	AZC	C3	Juniperus deppeana	Pinophyta	Cupressaceae	Endophyte	Leotiomycetes (Helotiales)	Fungi	1	Ascomycota	1	Leotiomycetes	1	Helotiales	1	NA	NA	NA	NA	NA	SH215666.06FU	1
HM123712	AZ1068	ARIZ:AZ1068	99	257	AZC	C3	Juniperus deppeana	Pinophyta	Cupressaceae	Endophyte	Leotiomycetes (Helotiales)	Fungi	1	Ascomycota	1	Leotiomycetes	1	Helotiales	1	NA	NA	NA	NA	NA	SH215666.06FU	1
HM123713	AZ1069	ARIZ:AZ1069	88	259	AZC	C2	Quercus rugosa	Angiospermae	Fagaceae	LLF	N/A	Fungi	1	Ascomycota	1	Sordariomycetes	0.98	NA	NA	NA	NA	NA	NA	NA	SH205985.06FU	1
HM123714	AZ1079	ARIZ:AZ1079	95	293	AZC	C2	Pinus arizonica var. arizonica	Pinophyta	Pinaceae	Endophyte	Leotiomycetes (Rhytismatales)	Fungi	1	Ascomycota	1	Leotiomycetes	1	Rhytismatales	1	NA	NA	NA	NA	NA	SH240310.06FU	1
HM123715	AZ1094	ARIZ:AZ1094	95	293	AZC	C2	Pinus arizonica var. arizonica	Pinophyta	Pinaceae	Endophyte	Leotiomycetes (Rhytismatales)	Fungi	1	Ascomycota	1	Leotiomycetes	1	Rhytismatales	1	NA	NA	NA	NA	NA	SH240310.06FU	1
HM123719	AZ1110	ARIZ:AZ1110	130	371	AZC	C1	Juniperus deppeana	Pinophyta	Cupressaceae	DLF	Dothideomycetes (N/A)	Fungi	1	Ascomycota	1	Dothideomycetes	1	NA	NA	NA	NA	NA	NA	NA	NA	NA
JQ759902	FL0027	ARIZ:FL0027	135	387	FLA	C1	Pinus elliottii	Pinophyta	Pinaceae	Endophyte	Pezizomycetes (Pezizales)	Fungi	1	Ascomycota	1	Pezizomycetes	1	Pezizales	1	NA	NA	NA	NA	NA	SH218399.06FU	1
JQ759903	FL0030	ARIZ:FL0030	135	388	FLA	C1	Pinus elliottii	Pinophyta	Pinaceae	Endophyte	Pezizomycetes (Pezizales)	Fungi	1	Ascomycota	1	Pezizomycetes	1	Pezizales	1	NA	NA	NA	NA	NA	SH218399.06FU	1
JQ759904	FL0031	ARIZ:FL0031	136	389	FLA	C1	Pinus elliottii	Pinophyta	Pinaceae	Endophyte	Sordariomycetes (Xylariales)	Fungi	1	Ascomycota	1	Sordariomycetes	1	Xylariales	1	Xylariaceae	1	Xylaria	1	Xylaria sp F 065,308	SH193313.06FU	1
JQ759905	FL0033	ARIZ:FL0033	135	390	FLA	C1	Pinus elliottii	Pinophyta	Pinaceae	Endophyte	Pezizomycetes (Pezizales)	Fungi	1	Ascomycota	1	Pezizomycetes	1	Pezizales	1	NA	NA	NA	NA	NA	SH218399.06FU	1
JQ759906	FL0034	ARIZ:FL0034	134	391	FLA	C1	Pinus elliottii	Pinophyta	Pinaceae	Endophyte	Sordariomycetes (Xylariales)	Fungi	1	Ascomycota	1	Sordariomycetes	1	Xylariales	1	NA	NA	NA	NA	NA	SH225513.06FU	1
JQ759907	FL0035	ARIZ:FL0035	137	392	FLA	C1	Pinus elliottii	Pinophyta	Pinaceae	Endophyte	Dothideomycetes (Pleosporales)	Fungi	1	Ascomycota	1	Dothideomycetes	1	Pleosporales	1	Sporormiaceae	1	Preussia	1	Preussia sp	SH190487.06FU	1
JQ759908	FL0038	ARIZ:FL0038	134	386	FLA	C1	Pinus elliottii	Pinophyta	Pinaceae	Endophyte	Sordariomycetes (Xylariales)	Fungi	1	Ascomycota	1	Sordariomycetes	1	Xylariales	1	NA	NA	NA	NA	NA	SH225513.06FU	1
JQ759909	FL0041	ARIZ:FL0041	132	393	FLA	C1	Pinus elliottii	Pinophyta	Pinaceae	Endophyte	Sordariomycetes (Xylariales)	Fungi	1	Ascomycota	1	Sordariomycetes	1	Xylariales	1	NA	NA	NA	NA	NA	SH225513.06FU	1
JQ759910	FL0042	ARIZ:FL0042	138	394	FLA	C1	Pinus elliottii	Pinophyta	Pinaceae	Endophyte	Dothideomycetes (Venturiales)	Fungi	1	Ascomycota	1	Dothideomycetes	0.97	Venturiales	0.89	Venturiaceae	0.89	NA	NA	NA	SH232828.06FU	0.89
JQ759911	FL0043	ARIZ:FL0043	139	395	FLA	C1	Pinus elliottii	Pinophyta	Pinaceae	Endophyte	Sordariomycetes (N/A)	Fungi	1	Ascomycota	1	Sordariomycetes	1	NA	NA	NA	NA	NA	NA	NA	SH229133.06FU	1
JQ759912	FL0044	ARIZ:FL0044	135	387	FLA	C1	Pinus elliottii	Pinophyta	Pinaceae	Endophyte	Pezizomycetes (Pezizales)	Fungi	1	Ascomycota	1	Pezizomycetes	1	Pezizales	1	NA	NA	NA	NA	NA	SH218399.06FU	1
JQ759913	FL0045	ARIZ:FL0045	140	396	FLA	C1	Pinus elliottii	Pinophyta	Pinaceae	Endophyte	Sordariomycetes (Xylariales)	Fungi	1	Ascomycota	1	Sordariomycetes	1	Xylariales	1	Xylariaceae	1	Xylaria	1	Xylaria sp	SH223885.06FU	1
JQ759914	FL0046	ARIZ:FL0046	135	387	FLA	C1	Pinus elliottii	Pinophyta	Pinaceae	Endophyte	Pezizomycetes (Pezizales)	Fungi	1	Ascomycota	1	Pezizomycetes	1	Pezizales	1	NA	NA	NA	NA	NA	SH218399.06FU	1
JQ759915	FL0050	ARIZ:FL0050	135	387	FLA	C1	Pinus elliottii	Pinophyta	Pinaceae	Endophyte	Pezizomycetes (Pezizales)	Fungi	1	Ascomycota	1	Pezizomycetes	1	Pezizales	1	NA	NA	NA	NA	NA	SH218399.06FU	1
JQ759916	FL0051	ARIZ:FL0051	135	397	FLA	C1	Pinus elliottii	Pinophyta	Pinaceae	Endophyte	Pezizomycetes (Pezizales)	Fungi	1	Ascomycota	1	Pezizomycetes	1	Pezizales	1	NA	NA	NA	NA	NA	SH218399.06FU	1
JQ759917	FL0052	ARIZ:FL0052	141	398	FLA	C1	Pinus elliottii	Pinophyta	Pinaceae	Endophyte	Leotiomycetes (Rhytismatales)	Fungi	1	Ascomycota	1	Leotiomycetes	1	Rhytismatales	1	Rhytismataceae	1	Lophodermium	1	Lophodermium sp	SH198383.06FU	1
JQ759918	FL0053	ARIZ:FL0053	135	387	FLA	C1	Pinus elliottii	Pinophyta	Pinaceae	Endophyte	Pezizomycetes (Pezizales)	Fungi	1	Ascomycota	1	Pezizomycetes	1	Pezizales	1	NA	NA	NA	NA	NA	SH218399.06FU	1
JQ759919	FL0056	ARIZ:FL0056	142	399	FLA	C1	Pinus elliottii	Pinophyta	Pinaceae	Endophyte	Sordariomycetes (Trichosphaeriales)	Fungi	1	Ascomycota	1	Sordariomycetes	1	Trichosphaeriales	1	Incertae sedis 26	0.96	Nigrospora	0.83	Nigrospora sp 5 MU 2012	SH197611.06FU	0.83
JQ759920	FL0057	ARIZ:FL0057	140	396	FLA	C1	Pinus elliottii	Pinophyta	Pinaceae	Endophyte	Sordariomycetes (Xylariales)	Fungi	1	Ascomycota	1	Sordariomycetes	1	Xylariales	1	Xylariaceae	1	Xylaria	1	Xylaria sp	SH223885.06FU	1
JQ759921	FL0058	ARIZ:FL0058	141	400	FLA	C1	Pinus elliottii	Pinophyta	Pinaceae	Endophyte	Leotiomycetes (Rhytismatales)	Fungi	1	Ascomycota	1	Leotiomycetes	1	Rhytismatales	1	Rhytismataceae	1	Lophodermium	1	Lophodermium sp	SH198383.06FU	1
JQ759922	FL0059	ARIZ:FL0059	6	401	FLA	C1	Pinus elliottii	Pinophyta	Pinaceae	Endophyte	Sordariomycetes (N/A)	Fungi	1	Ascomycota	1	Sordariomycetes	1	Coniochaetales	1	Coniochaetaceae	1	Lecythophora	1	Lecythophora hoffmannii	SH226442.06FU	1
JQ759923	FL0061	ARIZ:FL0061	141	402	FLA	C1	Pinus elliottii	Pinophyta	Pinaceae	Endophyte	Leotiomycetes (Rhytismatales)	Fungi	1	Ascomycota	1	Leotiomycetes	1	Rhytismatales	1	Rhytismataceae	1	Lophodermium	1	Lophodermium sp	SH198383.06FU	1
JQ759924	FL0062	ARIZ:FL0062	143	403	FLA	C1	Pinus elliottii	Pinophyta	Pinaceae	Endophyte	Sordariomycetes (Xylariales)	Fungi	1	Ascomycota	1	Sordariomycetes	1	Xylariales	1	Xylariaceae	1	Xylaria	1	Xylaria sp	SH240406.06FU	1
JQ759925	FL0064	ARIZ:FL0064	144	404	FLA	C1	Pinus elliottii	Pinophyta	Pinaceae	Endophyte	Sordariomycetes (N/A)	Fungi	1	Ascomycota	1	Sordariomycetes	1	Xylariales	1	Xylariaceae	1	Xylaria	1	Xylaria sp	SH218636.06FU	1
JQ759926	FL0065	ARIZ:FL0065	135	397	FLA	C1	Pinus elliottii	Pinophyta	Pinaceae	Endophyte	Pezizomycetes (Pezizales)	Fungi	1	Ascomycota	1	Pezizomycetes	1	Pezizales	1	NA	NA	NA	NA	NA	SH218399.06FU	1
JQ759927	FL0068	ARIZ:FL0068	6	405	FLA	C1	Pinus elliottii	Pinophyta	Pinaceae	Endophyte	Sordariomycetes (N/A)	Fungi	1	Ascomycota	1	Sordariomycetes	1	Coniochaetales	1	Coniochaetaceae	1	Lecythophora	1	Lecythophora hoffmannii	SH226455.06FU	1
JQ759928	FL0069	ARIZ:FL0069	135	406	FLA	C1	Pinus elliottii	Pinophyta	Pinaceae	Endophyte	Pezizomycetes (N/A)	Fungi	1	Ascomycota	1	Pezizomycetes	1	Pezizales	1	NA	NA	NA	NA	NA	SH218400.06FU	0.86
JQ759938	FL0079	ARIZ:FL0079	146	412	FLA	C1	Pinus clausa	Pinophyta	Pinaceae	Endophyte	Leotiomycetes (Helotiales)	Fungi	1	Ascomycota	1	Leotiomycetes	0.94	Helotiales	0.93	NA	NA	NA	NA	NA	NA	NA
JQ759939	FL0080	ARIZ:FL0080	147	413	FLA	C1	Pinus clausa	Pinophyta	Pinaceae	Endophyte	Eurotiomycetes (Chaetothyriales)	Fungi	1	Ascomycota	1	Eurotiomycetes	1	Chaetothyriales	1	Herpotrichiellaceae	1	Phaeomoniella	1	Phaeomoniella sp	SH221997.06FU	1
JQ759940	FL0081	ARIZ:FL0081	148	414	FLA	C1	Pinus clausa	Pinophyta	Pinaceae	Endophyte	Sordariomycetes (N/A)	Fungi	1	Ascomycota	1	Sordariomycetes	1	NA	NA	NA	NA	NA	NA	NA	SH237996.06FU	1
JQ759941	FL0084	ARIZ:FL0084	147	413	FLA	C1	Pinus clausa	Pinophyta	Pinaceae	Endophyte	Eurotiomycetes (Chaetothyriales)	Fungi	1	Ascomycota	1	Eurotiomycetes	1	Chaetothyriales	1	Herpotrichiellaceae	1	Phaeomoniella	1	Phaeomoniella sp	SH221997.06FU	1
JQ759942	FL0086	ARIZ:FL0086	147	413	FLA	C1	Pinus clausa	Pinophyta	Pinaceae	Endophyte	Eurotiomycetes (Chaetothyriales)	Fungi	1	Ascomycota	1	Eurotiomycetes	1	Chaetothyriales	1	Herpotrichiellaceae	1	Phaeomoniella	1	Phaeomoniella sp	SH221997.06FU	1
JQ759943	FL0087	ARIZ:FL0087	149	415	FLA	C1	Pinus clausa	Pinophyta	Pinaceae	Endophyte	Dothideomycetes (Botryosphaeriales)	Fungi	1	Ascomycota	1	Dothideomycetes	1	Botryosphaeriales	1	Botryosphaeriaceae	1	Septorioides	1	Septorioides pini-thunbergii	SH198330.06FU	1
JQ759944	FL0099	ARIZ:FL0099	135	416	FLA	C1	Pinus clausa	Pinophyta	Pinaceae	Endophyte	Pezizomycetes (N/A)	Fungi	1	Ascomycota	1	Pezizomycetes	1	Pezizales	1	NA	NA	NA	NA	NA	SH218400.06FU	1
JQ759945	FL0100	ARIZ:FL0100	150	417	FLA	C1	Quercus inopina	Angiospermae	Fagaceae	Endophyte	N/A	Fungi	1	Ascomycota	1	NA	NA	NA	NA	NA	NA	NA	NA	NA	SH215997.06FU	1
JQ759946	FL0103	ARIZ:FL0103	150	418	FLA	C1	Quercus inopina	Angiospermae	Fagaceae	Endophyte	N/A	Fungi	1	Ascomycota	1	NA	NA	NA	NA	NA	NA	NA	NA	NA	NA	NA
JQ759947	FL0104	ARIZ:FL0104	150	418	FLA	C1	Quercus inopina	Angiospermae	Fagaceae	Endophyte	N/A	Fungi	1	Ascomycota	1	NA	NA	NA	NA	NA	NA	NA	NA	NA	NA	NA
JQ759948	FL0106	ARIZ:FL0106	150	419	FLA	C1	Quercus inopina	Angiospermae	Fagaceae	Endophyte	N/A	Fungi	1	Ascomycota	1	NA	NA	NA	NA	NA	NA	NA	NA	NA	NA	NA
JQ759949	FL0109	ARIZ:FL0109	88	420	FLA	C1	Quercus inopina	Angiospermae	Fagaceae	Endophyte	Sordariomycetes (N/A)	Fungi	1	Ascomycota	1	Sordariomycetes	1	NA	NA	NA	NA	NA	NA	NA	SH205986.06FU	1
JQ759950	FL0110	ARIZ:FL0110	151	421	FLA	C1	Quercus inopina	Angiospermae	Fagaceae	Endophyte	Sordariomycetes (Sordariales)	Fungi	1	Ascomycota	1	Sordariomycetes	1	Sordariales	1	Chaetomiaceae	1	Chaetomium	1	Chaetomium sp	SH218147.06FU	1
JQ759951	FL0114	ARIZ:FL0114	88	422	FLA	C1	Quercus inopina	Angiospermae	Fagaceae	Endophyte	Sordariomycetes (N/A)	Fungi	1	Ascomycota	1	Sordariomycetes	1	NA	NA	NA	NA	NA	NA	NA	SH205986.06FU	1
JQ759952	FL0115	ARIZ:FL0115	150	419	FLA	C1	Quercus inopina	Angiospermae	Fagaceae	Endophyte	N/A	Fungi	1	Ascomycota	1	NA	NA	NA	NA	NA	NA	NA	NA	NA	NA	NA
JQ759953	FL0116	ARIZ:FL0116	150	418	FLA	C1	Quercus inopina	Angiospermae	Fagaceae	Endophyte	N/A	Fungi	1	Ascomycota	1	NA	NA	NA	NA	NA	NA	NA	NA	NA	NA	NA
JQ759954	FL0118	ARIZ:FL0118	132	409	FLA	C1	Quercus inopina	Angiospermae	Fagaceae	Endophyte	Sordariomycetes (Xylariales)	Fungi	1	Ascomycota	1	Sordariomycetes	1	Xylariales	1	NA	NA	NA	NA	NA	SH225513.06FU	1
JQ759955	FL0120	ARIZ:FL0120	135	387	FLA	C1	Quercus inopina	Angiospermae	Fagaceae	Endophyte	Pezizomycetes (Pezizales)	Fungi	1	Ascomycota	1	Pezizomycetes	1	Pezizales	1	NA	NA	NA	NA	NA	SH218399.06FU	1
JQ759956	FL0121	ARIZ:FL0121	88	423	FLA	C1	Quercus inopina	Angiospermae	Fagaceae	Endophyte	Sordariomycetes (N/A)	Fungi	1	Ascomycota	1	Sordariomycetes	1	NA	NA	NA	NA	NA	NA	NA	SH205986.06FU	1
JQ759957	FL0123	ARIZ:FL0123	152	424	FLA	C1	Quercus inopina	Angiospermae	Fagaceae	Endophyte	Sordariomycetes (Diaporthales)	Fungi	1	Ascomycota	1	Sordariomycetes	1	Diaporthales	1	NA	NA	NA	NA	NA	NA	NA
JQ759958	FL0124	ARIZ:FL0124	151	421	FLA	C1	Quercus inopina	Angiospermae	Fagaceae	Endophyte	Sordariomycetes (Sordariales)	Fungi	1	Ascomycota	1	Sordariomycetes	1	Sordariales	1	Chaetomiaceae	1	Chaetomium	1	Chaetomium sp	SH218147.06FU	1
JQ759959	FL0125	ARIZ:FL0125	150	419	FLA	C1	Quercus inopina	Angiospermae	Fagaceae	Endophyte	N/A	Fungi	1	Ascomycota	1	NA	NA	NA	NA	NA	NA	NA	NA	NA	NA	NA
JQ759960	FL0128	ARIZ:FL0128	153	425	FLA	C1	Quercus inopina	Angiospermae	Fagaceae	Endophyte	Sordariomycetes (N/A)	Fungi	1	Ascomycota	1	Sordariomycetes	1	NA	NA	NA	NA	NA	NA	NA	SH196125.06FU	1
JQ759961	FL0130	ARIZ:FL0130	150	418	FLA	C1	Quercus inopina	Angiospermae	Fagaceae	Endophyte	N/A	Fungi	1	Ascomycota	1	NA	NA	NA	NA	NA	NA	NA	NA	NA	NA	NA
JQ759962	FL0132	ARIZ:FL0132	88	420	FLA	C1	Quercus inopina	Angiospermae	Fagaceae	Endophyte	Sordariomycetes (N/A)	Fungi	1	Ascomycota	1	Sordariomycetes	1	NA	NA	NA	NA	NA	NA	NA	SH205986.06FU	1
JQ759963	FL0135	ARIZ:FL0135	154	426	FLA	C1	Quercus inopina	Angiospermae	Fagaceae	Endophyte	Dothideomycetes (Pleosporales)	Fungi	1	Ascomycota	1	Dothideomycetes	1	Pleosporales	0.86	Sporormiaceae	0.86	Preussia	0.86	Preussia minima	SH190473.06FU	0.86
JQ759964	FL0136	ARIZ:FL0136	150	419	FLA	C1	Quercus inopina	Angiospermae	Fagaceae	Endophyte	N/A	Fungi	1	Ascomycota	1	NA	NA	NA	NA	NA	NA	NA	NA	NA	NA	NA
JQ759965	FL0137	ARIZ:FL0137	88	420	FLA	C1	Quercus inopina	Angiospermae	Fagaceae	Endophyte	Sordariomycetes (N/A)	Fungi	1	Ascomycota	1	Sordariomycetes	1	NA	NA	NA	NA	NA	NA	NA	SH205986.06FU	1
JQ759966	FL0138	ARIZ:FL0138	142	427	FLA	C1	Quercus inopina	Angiospermae	Fagaceae	Endophyte	Sordariomycetes (Trichosphaeriales)	Fungi	1	Ascomycota	1	Sordariomycetes	1	Trichosphaeriales	1	Incertae sedis 26	0.96	Nigrospora	0.83	Nigrospora sp 5 MU 2012	SH237079.06FU	0.95
JQ759967	FL0139	ARIZ:FL0139	154	428	FLA	C1	Quercus inopina	Angiospermae	Fagaceae	Endophyte	Dothideomycetes (N/A)	Fungi	1	Ascomycota	1	Dothideomycetes	1	Pleosporales	0.86	Sporormiaceae	0.86	Preussia	0.86	Preussia minima	SH190478.06FU	1
JQ759983	FL0165	ARIZ:FL0165	157	435	FLA	C2	Serenoa repens	Angiospermae	Arecaceae	Endophyte	Sordariomycetes (Xylariales)	Fungi	1	Ascomycota	0.96	Sordariomycetes	0.95	Xylariales	0.91	NA	NA	NA	NA	NA	NA	NA
JQ759984	FL0166	ARIZ:FL0166	151	421	FLA	C2	Serenoa repens	Angiospermae	Arecaceae	Endophyte	Sordariomycetes (Sordariales)	Fungi	1	Ascomycota	1	Sordariomycetes	1	Sordariales	1	Chaetomiaceae	1	Chaetomium	1	Chaetomium sp	SH218147.06FU	1
JQ759985	FL0167	ARIZ:FL0167	142	427	FLA	C2	Quercus inopina	Angiospermae	Fagaceae	Endophyte	Sordariomycetes (Trichosphaeriales)	Fungi	1	Ascomycota	1	Sordariomycetes	1	Trichosphaeriales	1	Incertae sedis 26	0.96	Nigrospora	0.83	Nigrospora sp 5 MU 2012	SH237079.06FU	0.97
JQ759986	FL0168	ARIZ:FL0168	15	128	FLA	C2	Quercus inopina	Angiospermae	Fagaceae	Endophyte	Dothideomycetes (Dothideales)	Fungi	1	Ascomycota	1	Dothideomycetes	1	Dothideales	1	Dothioraceae	1	Kabatiella	0.98	Kabatiella bupleuri	SH229248.06FU	0.98
JQ759987	FL0170	ARIZ:FL0170	155	431	FLA	C2	Quercus inopina	Angiospermae	Fagaceae	Endophyte	N/A	Fungi	1	Ascomycota	1	Sordariomycetes	1	NA	NA	NA	NA	NA	NA	NA	SH226441.06FU	0.88
JQ759988	FL0175	ARIZ:FL0175	145	411	FLA	C2	Quercus inopina	Angiospermae	Fagaceae	Endophyte	N/A	Fungi	1	Ascomycota	1	NA	NA	NA	NA	NA	NA	NA	NA	NA	NA	NA
JQ759989	FL0176	ARIZ:FL0176	150	419	FLA	C2	Quercus inopina	Angiospermae	Fagaceae	Endophyte	N/A	Fungi	1	Ascomycota	1	NA	NA	NA	NA	NA	NA	NA	NA	NA	NA	NA
JQ759990	FL0178	ARIZ:FL0178	88	422	FLA	C2	Quercus inopina	Angiospermae	Fagaceae	Endophyte	Sordariomycetes (N/A)	Fungi	1	Ascomycota	1	Sordariomycetes	1	NA	NA	NA	NA	NA	NA	NA	SH205986.06FU	1
JQ759991	FL0180	ARIZ:FL0180	158	436	FLA	C2	Quercus inopina	Angiospermae	Fagaceae	Endophyte	Sordariomycetes (Diaporthales)	Fungi	1	Ascomycota	1	Sordariomycetes	1	Diaporthales	1	Incertae sedis 20	1	Tubakia	1	Tubakia seoraksanensis	SH224249.06FU	1
JQ759992	FL0182	ARIZ:FL0182	159	437	FLA	C2	Quercus inopina	Angiospermae	Fagaceae	Endophyte	N/A	Fungi	1	NA	NA	NA	NA	NA	NA	NA	NA	NA	NA	NA	NA	NA
JQ759993	FL0183	ARIZ:FL0183	144	438	FLA	C2	Quercus inopina	Angiospermae	Fagaceae	Endophyte	Sordariomycetes (Xylariales)	Fungi	1	Ascomycota	1	Sordariomycetes	1	Xylariales	1	Xylariaceae	1	Xylaria	1	Xylaria sp	SH197470.06FU	1
JQ760002	FL0193	ARIZ:FL0193	25	44	FLA	C2	Pinus clausa	Pinophyta	Pinaceae	Endophyte	Eurotiomycetes (Eurotiales)	Fungi	1	Ascomycota	1	Eurotiomycetes	1	Eurotiales	1	Trichocomaceae	1	Aspergillus	1	Aspergillus monodii	SH227456.06FU	1
JQ760003	FL0194	ARIZ:FL0194	149	415	FLA	C2	Pinus clausa	Pinophyta	Pinaceae	Endophyte	Dothideomycetes (Botryosphaeriales)	Fungi	1	Ascomycota	1	Dothideomycetes	1	Botryosphaeriales	1	Botryosphaeriaceae	0.93	Septorioides	0.91	Septorioides pini-thunbergii	SH198330.06FU	0.91
JQ760004	FL0195	ARIZ:FL0195	150	418	FLA	C2	Pinus clausa	Pinophyta	Pinaceae	Endophyte	N/A	Fungi	1	Ascomycota	1	NA	NA	NA	NA	NA	NA	NA	NA	NA	SH215997.06FU	0.8
JQ760005	FL0198	ARIZ:FL0198	149	415	FLA	C2	Pinus clausa	Pinophyta	Pinaceae	Endophyte	Dothideomycetes (Botryosphaeriales)	Fungi	1	Ascomycota	1	Dothideomycetes	1	Botryosphaeriales	1	Botryosphaeriaceae	1	Septorioides	1	Septorioides pini-thunbergii	SH198330.06FU	1
JQ760006	FL0201	ARIZ:FL0201	149	415	FLA	C2	Pinus clausa	Pinophyta	Pinaceae	Endophyte	Dothideomycetes (Botryosphaeriales)	Fungi	1	Ascomycota	1	Dothideomycetes	1	Botryosphaeriales	1	Botryosphaeriaceae	1	Septorioides	1	Septorioides pini-thunbergii	SH198330.06FU	1
JQ760007	FL0203	ARIZ:FL0203	82	442	FLA	C2	Pinus clausa	Pinophyta	Pinaceae	Endophyte	Dothideomycetes (Pleosporales)	Fungi	1	Ascomycota	1	Dothideomycetes	1	Pleosporales	1	NA	NA	NA	NA	NA	SH230642.06FU	1
JQ760018	FL0220	ARIZ:FL0220	135	387	FLA	C3	Pinus elliottii	Pinophyta	Pinaceae	Endophyte	Pezizomycetes (Pezizales)	Fungi	1	Ascomycota	1	Pezizomycetes	1	Pezizales	1	NA	NA	NA	NA	NA	SH218399.06FU	1
JQ760019	FL0222	ARIZ:FL0222	142	447	FLA	C3	Pinus elliottii	Pinophyta	Pinaceae	Endophyte	Sordariomycetes (Trichosphaeriales)	Fungi	1	Ascomycota	1	Sordariomycetes	1	Trichosphaeriales	1	Incertae sedis 26	0.96	Nigrospora	0.83	Nigrospora sp 5 MU 2012	SH237079.06FU	0.94
JQ760020	FL0224	ARIZ:FL0224	156	448	FLA	C3	Pinus elliottii	Pinophyta	Pinaceae	Endophyte	Sordariomycetes (N/A)	Fungi	1	Ascomycota	1	Sordariomycetes	1	NA	NA	NA	NA	NA	NA	NA	SH229133.06FU	1
JQ760021	FL0228	ARIZ:FL0228	162	449	FLA	C3	Pinus elliottii	Pinophyta	Pinaceae	Endophyte	Sordariomycetes (Xylariales)	Fungi	1	Ascomycota	1	Sordariomycetes	1	Xylariales	1	Xylariaceae	1	Xylaria	1	Xylaria sp	SH240406.06FU	1
JQ760022	FL0230	ARIZ:FL0230	163	450	FLA	C3	Pinus elliottii	Pinophyta	Pinaceae	Endophyte	Sordariomycetes (Xylariales)	Fungi	1	Ascomycota	1	Sordariomycetes	1	Xylariales	1	Xylariaceae	1	Muscodor	1	Muscodor yucatanensis	SH227005.06FU	1
JQ760023	FL0231	ARIZ:FL0231	164	451	FLA	C3	Pinus elliottii	Pinophyta	Pinaceae	Endophyte	Sordariomycetes (N/A)	Fungi	1	Ascomycota	1	Sordariomycetes	1	NA	NA	NA	NA	NA	NA	NA	SH226448.06FU	1
JQ760024	FL0232	ARIZ:FL0232	164	451	FLA	C3	Pinus elliottii	Pinophyta	Pinaceae	Endophyte	Sordariomycetes (N/A)	Fungi	1	Ascomycota	1	Sordariomycetes	1	NA	NA	NA	NA	NA	NA	NA	SH226448.06FU	1
JQ760025	FL0236	ARIZ:FL0236	107	452	FLA	C3	Pinus elliottii	Pinophyta	Pinaceae	Endophyte	Sordariomycetes (Xylariales)	Fungi	1	Ascomycota	1	Sordariomycetes	1	Xylariales	1	Xylariaceae	1	Xylaria	1	Xylaria sp	SH193306.06FU	1
JQ760026	FL0239	ARIZ:FL0239	165	453	FLA	C3	Pinus elliottii	Pinophyta	Pinaceae	Endophyte	Sordariomycetes (Xylariales)	Fungi	1	Ascomycota	1	Sordariomycetes	1	Xylariales	1	Xylariaceae	1	Nemania	1	Nemania abortiva	SH240860.06FU	1
JQ760027	FL0244	ARIZ:FL0244	141	400	FLA	C3	Pinus elliottii	Pinophyta	Pinaceae	Endophyte	Leotiomycetes (Rhytismatales)	Fungi	1	Ascomycota	1	Leotiomycetes	1	Rhytismatales	1	Rhytismataceae	1	Lophodermium	1	Lophodermium sp	SH198383.06FU	1
JQ760028	FL0246	ARIZ:FL0246	166	454	FLA	C3	Pinus elliottii	Pinophyta	Pinaceae	Endophyte	Sordariomycetes (Xylariales)	Fungi	1	Ascomycota	1	Sordariomycetes	1	Xylariales	1	Xylariaceae	1	Xylaria	1	Xylaria sp	SH240406.06FU	1
JQ760029	FL0249	ARIZ:FL0249	141	455	FLA	C3	Pinus elliottii	Pinophyta	Pinaceae	Endophyte	Leotiomycetes (Rhytismatales)	Fungi	1	Ascomycota	1	Leotiomycetes	1	Rhytismatales	1	Rhytismataceae	1	Lophodermium	1	Lophodermium sp	SH198383.06FU	1
JQ760030	FL0255	ARIZ:FL0255	133	383	FLA	C3	Pinus elliottii	Pinophyta	Pinaceae	Endophyte	Sordariomycetes (Xylariales)	Fungi	1	Ascomycota	1	Sordariomycetes	1	Xylariales	1	NA	NA	NA	NA	NA	SH194577.06FU	1
JQ760031	FL0258	ARIZ:FL0258	6	401	FLA	C3	Pinus elliottii	Pinophyta	Pinaceae	Endophyte	Sordariomycetes (N/A)	Fungi	1	Ascomycota	1	Sordariomycetes	1	Coniochaetales	1	Coniochaetaceae	1	Lecythophora	1	Lecythophora hoffmannii	SH226442.06FU	1
JQ760032	FL0265	ARIZ:FL0265	155	431	FLA	C3	Pinus elliottii	Pinophyta	Pinaceae	Endophyte	N/A	Fungi	1	Ascomycota	1	Sordariomycetes	1	NA	NA	NA	NA	NA	NA	NA	SH226441.06FU	1
JQ760064	FL0301	ARIZ:FL0301	168	462	FLA	C3	Serenoa repens	Angiospermae	Arecaceae	Endophyte	Dothideomycetes (N/A)	Fungi	1	Ascomycota	1	Dothideomycetes	1	NA	NA	NA	NA	NA	NA	NA	SH196531.06FU	1
JQ760065	FL0302	ARIZ:FL0302	169	463	FLA	C3	Serenoa repens	Angiospermae	Arecaceae	Endophyte	Dothideomycetes (N/A)	Fungi	1	Ascomycota	1	Dothideomycetes	1	NA	NA	NA	NA	NA	NA	NA	SH222846.06FU	1
JQ760066	FL0303	ARIZ:FL0303	168	462	FLA	C3	Serenoa repens	Angiospermae	Arecaceae	Endophyte	Dothideomycetes (N/A)	Fungi	1	Ascomycota	1	Dothideomycetes	1	NA	NA	NA	NA	NA	NA	NA	SH196531.06FU	1
JQ760067	FL0304	ARIZ:FL0304	170	464	FLA	C3	Serenoa repens	Angiospermae	Arecaceae	Endophyte	Dothideomycetes (N/A)	Fungi	1	Ascomycota	1	Dothideomycetes	1	NA	NA	NA	NA	NA	NA	NA	SH241370.06FU	1
JQ760068	FL0305	ARIZ:FL0305	169	465	FLA	C3	Serenoa repens	Angiospermae	Arecaceae	Endophyte	Dothideomycetes (N/A)	Fungi	1	Ascomycota	1	Dothideomycetes	1	NA	NA	NA	NA	NA	NA	NA	SH222846.06FU	1
JQ760069	FL0306	ARIZ:FL0306	171	466	FLA	C3	Serenoa repens	Angiospermae	Arecaceae	Endophyte	Dothideomycetes (N/A)	Fungi	1	Ascomycota	1	Dothideomycetes	1	NA	NA	NA	NA	NA	NA	NA	SH222846.06FU	1
JQ760070	FL0307	ARIZ:FL0307	170	464	FLA	C3	Serenoa repens	Angiospermae	Arecaceae	Endophyte	Dothideomycetes (N/A)	Fungi	1	Ascomycota	1	Dothideomycetes	1	NA	NA	NA	NA	NA	NA	NA	SH241370.06FU	1
JQ760071	FL0308	ARIZ:FL0308	168	462	FLA	C3	Serenoa repens	Angiospermae	Arecaceae	Endophyte	Dothideomycetes (N/A)	Fungi	1	Ascomycota	1	Dothideomycetes	1	NA	NA	NA	NA	NA	NA	NA	SH196531.06FU	1
JQ760072	FL0309	ARIZ:FL0309	171	466	FLA	C3	Serenoa repens	Angiospermae	Arecaceae	Endophyte	Dothideomycetes (N/A)	Fungi	1	Ascomycota	1	Dothideomycetes	1	NA	NA	NA	NA	NA	NA	NA	SH222846.06FU	1
JQ760073	FL0310	ARIZ:FL0310	168	462	FLA	C3	Serenoa repens	Angiospermae	Arecaceae	Endophyte	Dothideomycetes (N/A)	Fungi	1	Ascomycota	1	Dothideomycetes	1	NA	NA	NA	NA	NA	NA	NA	SH196531.06FU	1
JQ760074	FL0311	ARIZ:FL0311	168	462	FLA	C3	Serenoa repens	Angiospermae	Arecaceae	Endophyte	Dothideomycetes (N/A)	Fungi	1	Ascomycota	1	Dothideomycetes	1	NA	NA	NA	NA	NA	NA	NA	SH196531.06FU	1
JQ760075	FL0312	ARIZ:FL0312	169	465	FLA	C3	Serenoa repens	Angiospermae	Arecaceae	Endophyte	Dothideomycetes (N/A)	Fungi	1	Ascomycota	1	Dothideomycetes	1	NA	NA	NA	NA	NA	NA	NA	SH222846.06FU	1
JQ760076	FL0313	ARIZ:FL0313	151	421	FLA	C3	Serenoa repens	Angiospermae	Arecaceae	Endophyte	Sordariomycetes (Sordariales)	Fungi	1	Ascomycota	1	Sordariomycetes	1	Sordariales	1	Chaetomiaceae	1	Chaetomium	1	Chaetomium sp	SH218147.06FU	1
JQ760077	FL0315	ARIZ:FL0315	170	464	FLA	C3	Serenoa repens	Angiospermae	Arecaceae	Endophyte	Dothideomycetes (N/A)	Fungi	1	Ascomycota	1	Dothideomycetes	1	NA	NA	NA	NA	NA	NA	NA	SH241370.06FU	1
JQ760078	FL0316	ARIZ:FL0316	170	464	FLA	C3	Serenoa repens	Angiospermae	Arecaceae	Endophyte	Dothideomycetes (N/A)	Fungi	1	Ascomycota	1	Dothideomycetes	1	NA	NA	NA	NA	NA	NA	NA	SH241370.06FU	1
JQ760079	FL0317	ARIZ:FL0317	151	421	FLA	C3	Serenoa repens	Angiospermae	Arecaceae	Endophyte	Sordariomycetes (Sordariales)	Fungi	1	Ascomycota	1	Sordariomycetes	1	Sordariales	1	Chaetomiaceae	1	Chaetomium	1	Chaetomium sp	SH218147.06FU	1
JQ760080	FL0318	ARIZ:FL0318	168	462	FLA	C3	Serenoa repens	Angiospermae	Arecaceae	Endophyte	Dothideomycetes (N/A)	Fungi	1	Ascomycota	1	Dothideomycetes	1	NA	NA	NA	NA	NA	NA	NA	SH196531.06FU	1
JQ760081	FL0319	ARIZ:FL0319	170	464	FLA	C3	Serenoa repens	Angiospermae	Arecaceae	Endophyte	Dothideomycetes (N/A)	Fungi	1	Ascomycota	1	Dothideomycetes	1	NA	NA	NA	NA	NA	NA	NA	SH241370.06FU	1
JQ760082	FL0320	ARIZ:FL0320	169	467	FLA	C3	Serenoa repens	Angiospermae	Arecaceae	Endophyte	Dothideomycetes (N/A)	Fungi	1	Ascomycota	1	Dothideomycetes	1	NA	NA	NA	NA	NA	NA	NA	SH222846.06FU	1
JQ760083	FL0321	ARIZ:FL0321	170	464	FLA	C3	Serenoa repens	Angiospermae	Arecaceae	Endophyte	Dothideomycetes (N/A)	Fungi	1	Ascomycota	1	Dothideomycetes	1	NA	NA	NA	NA	NA	NA	NA	SH241370.06FU	1
JQ760084	FL0322	ARIZ:FL0322	168	462	FLA	C3	Serenoa repens	Angiospermae	Arecaceae	Endophyte	Dothideomycetes (N/A)	Fungi	1	Ascomycota	1	Dothideomycetes	1	NA	NA	NA	NA	NA	NA	NA	SH196531.06FU	1
JQ760085	FL0323	ARIZ:FL0323	151	421	FLA	C3	Serenoa repens	Angiospermae	Arecaceae	Endophyte	Sordariomycetes (Sordariales)	Fungi	1	Ascomycota	1	Sordariomycetes	1	Sordariales	1	Chaetomiaceae	1	Chaetomium	1	Chaetomium sp	SH218147.06FU	1
JQ760086	FL0324	ARIZ:FL0324	168	462	FLA	C3	Serenoa repens	Angiospermae	Arecaceae	Endophyte	Dothideomycetes (N/A)	Fungi	1	Ascomycota	1	Dothideomycetes	1	NA	NA	NA	NA	NA	NA	NA	SH196531.06FU	1
JQ760087	FL0325	ARIZ:FL0325	169	465	FLA	C3	Serenoa repens	Angiospermae	Arecaceae	Endophyte	Dothideomycetes (N/A)	Fungi	1	Ascomycota	1	Dothideomycetes	1	NA	NA	NA	NA	NA	NA	NA	SH222846.06FU	1
JQ760088	FL0327	ARIZ:FL0327	169	467	FLA	C3	Serenoa repens	Angiospermae	Arecaceae	Endophyte	Dothideomycetes (N/A)	Fungi	1	Ascomycota	1	Dothideomycetes	1	NA	NA	NA	NA	NA	NA	NA	SH222846.06FU	1
JQ760089	FL0329	ARIZ:FL0329	171	466	FLA	C3	Serenoa repens	Angiospermae	Arecaceae	Endophyte	Dothideomycetes (N/A)	Fungi	1	Ascomycota	1	Dothideomycetes	1	NA	NA	NA	NA	NA	NA	NA	SH222846.06FU	1
JQ760090	FL0330	ARIZ:FL0330	169	467	FLA	C3	Serenoa repens	Angiospermae	Arecaceae	Endophyte	Dothideomycetes (N/A)	Fungi	1	Ascomycota	1	Dothideomycetes	1	NA	NA	NA	NA	NA	NA	NA	SH222846.06FU	1
JQ760091	FL0331	ARIZ:FL0331	170	464	FLA	C3	Serenoa repens	Angiospermae	Arecaceae	Endophyte	Dothideomycetes (N/A)	Fungi	1	Ascomycota	1	Dothideomycetes	1	NA	NA	NA	NA	NA	NA	NA	SH241370.06FU	1
JQ760092	FL0333	ARIZ:FL0333	168	462	FLA	C3	Serenoa repens	Angiospermae	Arecaceae	Endophyte	Dothideomycetes (N/A)	Fungi	1	Ascomycota	1	Dothideomycetes	1	NA	NA	NA	NA	NA	NA	NA	SH196531.06FU	1
JQ760093	FL0334	ARIZ:FL0334	169	463	FLA	C3	Serenoa repens	Angiospermae	Arecaceae	Endophyte	Dothideomycetes (N/A)	Fungi	1	Ascomycota	1	Dothideomycetes	1	NA	NA	NA	NA	NA	NA	NA	SH222846.06FU	1
JQ760094	FL0337	ARIZ:FL0337	169	463	FLA	C3	Serenoa repens	Angiospermae	Arecaceae	Endophyte	Dothideomycetes (N/A)	Fungi	1	Ascomycota	1	Dothideomycetes	1	NA	NA	NA	NA	NA	NA	NA	SH222846.06FU	1
JQ760095	FL0338	ARIZ:FL0338	168	462	FLA	C3	Serenoa repens	Angiospermae	Arecaceae	Endophyte	Dothideomycetes (N/A)	Fungi	1	Ascomycota	1	Dothideomycetes	1	NA	NA	NA	NA	NA	NA	NA	SH196531.06FU	1
JQ760096	FL0339	ARIZ:FL0339	168	462	FLA	C3	Serenoa repens	Angiospermae	Arecaceae	Endophyte	Dothideomycetes (N/A)	Fungi	1	Ascomycota	1	Dothideomycetes	1	NA	NA	NA	NA	NA	NA	NA	SH196531.06FU	1
JQ760097	FL0340	ARIZ:FL0340	168	462	FLA	C3	Serenoa repens	Angiospermae	Arecaceae	Endophyte	Dothideomycetes (N/A)	Fungi	1	Ascomycota	1	Dothideomycetes	1	NA	NA	NA	NA	NA	NA	NA	SH196531.06FU	1
JQ760112	FL0357	ARIZ:FL0357	172	472	FLA	C3	Pinus clausa	Pinophyta	Pinaceae	Endophyte	Dothideomycetes (Venturiales)	Fungi	1	Ascomycota	1	Dothideomycetes	0.9	Venturiales	0.81	Venturiaceae	0.81	NA	NA	NA	SH232828.06FU	0.81
JQ760113	FL0359	ARIZ:FL0359	144	404	FLA	C3	Pinus clausa	Pinophyta	Pinaceae	Endophyte	Sordariomycetes (N/A)	Fungi	1	Ascomycota	1	Sordariomycetes	1	Xylariales	1	Xylariaceae	1	Xylaria	1	Xylaria sp	SH218636.06FU	1
JQ760114	FL0360	ARIZ:FL0360	149	415	FLA	C3	Pinus clausa	Pinophyta	Pinaceae	Endophyte	Dothideomycetes (Botryosphaeriales)	Fungi	1	Ascomycota	1	Dothideomycetes	1	Botryosphaeriales	1	Botryosphaeriaceae	1	Septorioides	1	Septorioides pini-thunbergii	SH198330.06FU	1
JQ760115	FL0361	ARIZ:FL0361	149	415	FLA	C3	Pinus clausa	Pinophyta	Pinaceae	Endophyte	Dothideomycetes (Botryosphaeriales)	Fungi	1	Ascomycota	1	Dothideomycetes	1	Botryosphaeriales	1	Botryosphaeriaceae	1	Septorioides	1	Septorioides pini-thunbergii	SH198330.06FU	1
JQ760116	FL0365	ARIZ:FL0365	151	421	FLA	C3	Pinus clausa	Pinophyta	Pinaceae	Endophyte	Sordariomycetes (Sordariales)	Fungi	1	Ascomycota	1	Sordariomycetes	1	Sordariales	1	Chaetomiaceae	1	Chaetomium	1	Chaetomium sp	SH218147.06FU	1
JQ760343	FL0636	ARIZ:FL0636	142	399	FLA	C2	Pinus elliottii	Pinophyta	Pinaceae	Endophyte	Sordariomycetes (Trichosphaeriales)	Fungi	1	Ascomycota	1	Sordariomycetes	1	Trichosphaeriales	1	Incertae sedis 26	0.96	Nigrospora	0.83	Nigrospora sp 5 MU 2012	SH197611.06FU	0.83
JQ760344	FL0637	ARIZ:FL0637	132	409	FLA	C2	Pinus elliottii	Pinophyta	Pinaceae	Endophyte	Sordariomycetes (Xylariales)	Fungi	1	Ascomycota	1	Sordariomycetes	1	Xylariales	1	NA	NA	NA	NA	NA	SH225513.06FU	1
JQ760345	FL0638	ARIZ:FL0638	183	543	FLA	C2	Pinus elliottii	Pinophyta	Pinaceae	Endophyte	Sordariomycetes (N/A)	Fungi	1	Ascomycota	1	Sordariomycetes	1	NA	NA	NA	NA	NA	NA	NA	SH196117.06FU	0.99
JQ760346	FL0640	ARIZ:FL0640	184	544	FLA	C2	Pinus elliottii	Pinophyta	Pinaceae	Endophyte	Sordariomycetes (N/A)	Fungi	1	Ascomycota	1	Sordariomycetes	1	NA	NA	NA	NA	NA	NA	NA	SH231234.06FU	1
JQ760347	FL0641	ARIZ:FL0641	185	545	FLA	C2	Pinus elliottii	Pinophyta	Pinaceae	Endophyte	Sordariomycetes (N/A)	Fungi	1	Ascomycota	0.91	Sordariomycetes	0.89	NA	NA	NA	NA	NA	NA	NA	NA	NA
JQ760348	FL0643	ARIZ:FL0643	148	414	FLA	C2	Pinus elliottii	Pinophyta	Pinaceae	Endophyte	Sordariomycetes (N/A)	Fungi	1	Ascomycota	1	Sordariomycetes	1	NA	NA	NA	NA	NA	NA	NA	SH237996.06FU	1
JQ760349	FL0644	ARIZ:FL0644	136	389	FLA	C2	Pinus elliottii	Pinophyta	Pinaceae	Endophyte	Sordariomycetes (Xylariales)	Fungi	1	Ascomycota	1	Sordariomycetes	1	Xylariales	1	Xylariaceae	1	Xylaria	1	Xylaria sp F 065,308	SH193313.06FU	1
JQ760350	FL0645	ARIZ:FL0645	134	386	FLA	C2	Pinus elliottii	Pinophyta	Pinaceae	Endophyte	Sordariomycetes (Xylariales)	Fungi	1	Ascomycota	1	Sordariomycetes	1	Xylariales	1	NA	NA	NA	NA	NA	SH225513.06FU	1
JQ760351	FL0646	ARIZ:FL0646	162	449	FLA	C2	Pinus elliottii	Pinophyta	Pinaceae	Endophyte	Sordariomycetes (Xylariales)	Fungi	1	Ascomycota	1	Sordariomycetes	1	Xylariales	1	Xylariaceae	1	Xylaria	1	Xylaria sp	SH240406.06FU	1
JQ760352	FL0647	ARIZ:FL0647	132	381	FLA	C2	Pinus elliottii	Pinophyta	Pinaceae	Endophyte	Sordariomycetes (Xylariales)	Fungi	1	Ascomycota	1	Sordariomycetes	1	Xylariales	1	NA	NA	NA	NA	NA	SH225513.06FU	1
JQ760353	FL0649	ARIZ:FL0649	137	392	FLA	C2	Pinus elliottii	Pinophyta	Pinaceae	Endophyte	Dothideomycetes (Pleosporales)	Fungi	1	Ascomycota	1	Dothideomycetes	1	Pleosporales	1	Sporormiaceae	1	Preussia	1	Preussia sp	SH190487.06FU	1
JQ760354	FL0650	ARIZ:FL0650	186	546	FLA	C2	Pinus elliottii	Pinophyta	Pinaceae	Endophyte	Sordariomycetes (N/A)	Fungi	1	Ascomycota	0.99	Sordariomycetes	0.99	NA	NA	NA	NA	NA	NA	NA	NA	NA
JQ760355	FL0655	ARIZ:FL0655	142	447	FLA	C2	Pinus elliottii	Pinophyta	Pinaceae	Endophyte	Sordariomycetes (Trichosphaeriales)	Fungi	1	Ascomycota	1	Sordariomycetes	1	Trichosphaeriales	1	Incertae sedis 26	0.96	Nigrospora	0.83	Nigrospora sp 5 MU 2012	SH237079.06FU	0.94
JQ760356	FL0656	ARIZ:FL0656	162	479	FLA	C2	Pinus elliottii	Pinophyta	Pinaceae	Endophyte	Sordariomycetes (Xylariales)	Fungi	1	Ascomycota	1	Sordariomycetes	1	Xylariales	1	Xylariaceae	1	Xylaria	1	Xylaria sp	SH240406.06FU	1
JQ760357	FL0657	ARIZ:FL0657	186	547	FLA	C2	Pinus elliottii	Pinophyta	Pinaceae	Endophyte	Sordariomycetes (N/A)	Fungi	1	Ascomycota	0.85	Sordariomycetes	0.82	NA	NA	NA	NA	NA	NA	NA	NA	NA
JQ760358	FL0660	ARIZ:FL0660	187	548	FLA	C2	Pinus elliottii	Pinophyta	Pinaceae	Endophyte	Sordariomycetes (N/A)	Fungi	1	Ascomycota	1	Sordariomycetes	1	NA	NA	NA	NA	NA	NA	NA	SH239367.06FU	1
JQ760359	FL0661	ARIZ:FL0661	154	428	FLA	C2	Pinus elliottii	Pinophyta	Pinaceae	Endophyte	Dothideomycetes (N/A)	Fungi	1	Ascomycota	1	Dothideomycetes	1	Pleosporales	0.86	Sporormiaceae	0.86	Preussia	0.86	Preussia minima	SH190478.06FU	1
JQ760360	FL0662	ARIZ:FL0662	188	549	FLA	C2	Pinus elliottii	Pinophyta	Pinaceae	Endophyte	Sordariomycetes (Xylariales)	Fungi	1	Ascomycota	1	Sordariomycetes	1	Xylariales	1	Xylariaceae	1	Xylaria	1	Xylaria sp XL A45	SH227280.06FU	1
JQ760361	FL0664	ARIZ:FL0664	135	482	FLA	C2	Pinus elliottii	Pinophyta	Pinaceae	Endophyte	Pezizomycetes (Pezizales)	Fungi	1	Ascomycota	1	Pezizomycetes	1	Pezizales	1	NA	NA	NA	NA	NA	SH218399.06FU	1
JQ760362	FL0665	ARIZ:FL0665	132	409	FLA	C2	Pinus elliottii	Pinophyta	Pinaceae	Endophyte	Sordariomycetes (Xylariales)	Fungi	1	Ascomycota	1	Sordariomycetes	1	Xylariales	1	NA	NA	NA	NA	NA	SH225513.06FU	1
JQ760363	FL0666	ARIZ:FL0666	175	495	FLA	C2	Pinus elliottii	Pinophyta	Pinaceae	Endophyte	Sordariomycetes (Xylariales)	Fungi	1	Ascomycota	1	Sordariomycetes	1	Xylariales	1	Xylariaceae	1	NA	NA	NA	SH227123.06FU	1
JQ760364	FL0667	ARIZ:FL0667	164	451	FLA	C2	Pinus elliottii	Pinophyta	Pinaceae	Endophyte	Sordariomycetes (N/A)	Fungi	1	Ascomycota	1	Sordariomycetes	1	NA	NA	NA	NA	NA	NA	NA	SH226448.06FU	1
JQ760365	FL0668	ARIZ:FL0668	135	387	FLA	C2	Pinus elliottii	Pinophyta	Pinaceae	Endophyte	Pezizomycetes (Pezizales)	Fungi	1	Ascomycota	1	Pezizomycetes	1	Pezizales	1	NA	NA	NA	NA	NA	SH218399.06FU	1
JQ760366	FL0672	ARIZ:FL0672	134	386	FLA	C2	Pinus elliottii	Pinophyta	Pinaceae	Endophyte	Sordariomycetes (Xylariales)	Fungi	1	Ascomycota	1	Sordariomycetes	1	Xylariales	1	NA	NA	NA	NA	NA	SH225513.06FU	1
JQ760367	FL0674	ARIZ:FL0674	148	414	FLA	C2	Pinus elliottii	Pinophyta	Pinaceae	Endophyte	Sordariomycetes (N/A)	Fungi	1	Ascomycota	1	Sordariomycetes	1	NA	NA	NA	NA	NA	NA	NA	SH237996.06FU	1
JQ760368	FL0675	ARIZ:FL0675	132	393	FLA	C2	Pinus elliottii	Pinophyta	Pinaceae	Endophyte	Sordariomycetes (Xylariales)	Fungi	1	Ascomycota	1	Sordariomycetes	1	Xylariales	1	NA	NA	NA	NA	NA	SH225513.06FU	1
JQ760369	FL0676	ARIZ:FL0676	141	400	FLA	C2	Pinus elliottii	Pinophyta	Pinaceae	Endophyte	Leotiomycetes (Rhytismatales)	Fungi	1	Ascomycota	1	Leotiomycetes	1	Rhytismatales	1	Rhytismataceae	1	Lophodermium	1	Lophodermium sp	SH198383.06FU	1
JQ760370	FL0677	ARIZ:FL0677	189	550	FLA	C2	Pinus elliottii	Pinophyta	Pinaceae	Endophyte	N/A	Fungi	1	NA	NA	NA	NA	NA	NA	NA	NA	NA	NA	NA	NA	NA
JQ760371	FL0678	ARIZ:FL0678	135	471	FLA	C2	Pinus elliottii	Pinophyta	Pinaceae	Endophyte	Pezizomycetes (N/A)	Fungi	1	Ascomycota	1	Pezizomycetes	1	Pezizales	1	NA	NA	NA	NA	NA	SH218400.06FU	1
JQ760372	FL0679	ARIZ:FL0679	136	500	FLA	C2	Pinus elliottii	Pinophyta	Pinaceae	Endophyte	Sordariomycetes (Xylariales)	Fungi	1	Ascomycota	1	Sordariomycetes	1	Xylariales	1	Xylariaceae	1	NA	NA	NA	SH197607.06FU	1
JQ760373	FL0680	ARIZ:FL0680	135	416	FLA	C2	Pinus elliottii	Pinophyta	Pinaceae	Endophyte	Pezizomycetes (N/A)	Fungi	1	Ascomycota	1	Pezizomycetes	1	Pezizales	1	NA	NA	NA	NA	NA	SH218400.06FU	1
JQ760404	FL0729	ARIZ:FL0729	127	555	FLA	C1	Serenoa repens	Angiospermae	Arecaceae	Endophyte	Dothideomycetes (Pleosporales)	Fungi	1	Ascomycota	1	Dothideomycetes	1	Pleosporales	1	NA	NA	NA	NA	NA	SH197544.06FU	1
JQ760405	FL0730	ARIZ:FL0730	16	556	FLA	C1	Serenoa repens	Angiospermae	Arecaceae	Endophyte	Eurotiomycetes (Eurotiales)	Fungi	1	Ascomycota	1	Eurotiomycetes	0.99	Eurotiales	0.99	Trichocomaceae	0.99	Penicillium	0.99	Penicillium sp	SH201041.06FU	0.89
JQ760406	FL0731	ARIZ:FL0731	191	557	FLA	C1	Serenoa repens	Angiospermae	Arecaceae	Endophyte	Saccharomycetes (Saccharomycetales)	Fungi	1	Ascomycota	1	Saccharomycetes	1	Saccharomycetales	1	Incertae sedis 11	1	Candida	1	Candida smithsonii	SH216776.06FU	1
JQ760407	FL0732	ARIZ:FL0732	192	558	FLA	C1	Serenoa repens	Angiospermae	Arecaceae	Endophyte	N/A	Fungi	1	Ascomycota	1	NA	NA	NA	NA	NA	NA	NA	NA	NA	SH190182.06FU	1
JQ760408	FL0737	ARIZ:FL0737	191	557	FLA	C1	Serenoa repens	Angiospermae	Arecaceae	Endophyte	Saccharomycetes (Saccharomycetales)	Fungi	1	Ascomycota	1	Saccharomycetes	1	Saccharomycetales	1	Incertae sedis 11	1	Candida	1	Candida smithsonii	SH216776.06FU	1
JQ760430	FL0771	ARIZ:FL0771	88	571	FLA	C3	Quercus inopina	Angiospermae	Fagaceae	Endophyte	Sordariomycetes (N/A)	Fungi	1	Ascomycota	1	Sordariomycetes	1	NA	NA	NA	NA	NA	NA	NA	SH205986.06FU	1
JQ760431	FL0774	ARIZ:FL0774	150	418	FLA	C3	Quercus inopina	Angiospermae	Fagaceae	Endophyte	N/A	Fungi	1	Ascomycota	1	NA	NA	NA	NA	NA	NA	NA	NA	NA	NA	NA
JQ760432	FL0775	ARIZ:FL0775	135	390	FLA	C3	Quercus inopina	Angiospermae	Fagaceae	Endophyte	Pezizomycetes (Pezizales)	Fungi	1	Ascomycota	1	Pezizomycetes	1	Pezizales	1	NA	NA	NA	NA	NA	SH218399.06FU	1
JQ760433	FL0776	ARIZ:FL0776	150	419	FLA	C3	Quercus inopina	Angiospermae	Fagaceae	Endophyte	N/A	Fungi	1	Ascomycota	1	NA	NA	NA	NA	NA	NA	NA	NA	NA	NA	NA
JQ760434	FL0777	ARIZ:FL0777	150	418	FLA	C3	Quercus inopina	Angiospermae	Fagaceae	Endophyte	N/A	Fungi	1	Ascomycota	1	NA	NA	NA	NA	NA	NA	NA	NA	NA	NA	NA
JQ760435	FL0778	ARIZ:FL0778	88	420	FLA	C3	Quercus inopina	Angiospermae	Fagaceae	Endophyte	Sordariomycetes (N/A)	Fungi	1	Ascomycota	1	Sordariomycetes	1	NA	NA	NA	NA	NA	NA	NA	SH205986.06FU	1
JQ760436	FL0779	ARIZ:FL0779	89	572	FLA	C3	Quercus inopina	Angiospermae	Fagaceae	Endophyte	N/A	Fungi	1	NA	NA	NA	NA	NA	NA	NA	NA	NA	NA	NA	NA	NA
JQ760437	FL0780	ARIZ:FL0780	150	418	FLA	C3	Quercus inopina	Angiospermae	Fagaceae	Endophyte	N/A	Fungi	1	Ascomycota	1	NA	NA	NA	NA	NA	NA	NA	NA	NA	SH215997.06FU	0.83
JQ760438	FL0781	ARIZ:FL0781	150	418	FLA	C3	Quercus inopina	Angiospermae	Fagaceae	Endophyte	N/A	Fungi	1	Ascomycota	1	NA	NA	NA	NA	NA	NA	NA	NA	NA	NA	NA
JQ760439	FL0782	ARIZ:FL0782	150	419	FLA	C3	Quercus inopina	Angiospermae	Fagaceae	Endophyte	N/A	Fungi	1	Ascomycota	1	NA	NA	NA	NA	NA	NA	NA	NA	NA	NA	NA
JQ760440	FL0784	ARIZ:FL0784	96	443	FLA	C3	Quercus inopina	Angiospermae	Fagaceae	Endophyte	Sordariomycetes (Diaporthales)	Fungi	1	Ascomycota	1	Sordariomycetes	1	Diaporthales	1	Gnomoniaceae	1	Gnomonia	1	Gnomoniopsis paraclavulata	SH129087.06FU	1
JQ760441	FL0786	ARIZ:FL0786	150	418	FLA	C3	Quercus inopina	Angiospermae	Fagaceae	Endophyte	N/A	Fungi	1	Ascomycota	1	NA	NA	NA	NA	NA	NA	NA	NA	NA	NA	NA
JQ760442	FL0787	ARIZ:FL0787	150	418	FLA	C3	Quercus inopina	Angiospermae	Fagaceae	Endophyte	N/A	Fungi	1	Ascomycota	1	NA	NA	NA	NA	NA	NA	NA	NA	NA	NA	NA
JQ760443	FL0788	ARIZ:FL0788	194	573	FLA	C3	Quercus inopina	Angiospermae	Fagaceae	Endophyte	Sordariomycetes (N/A)	Fungi	1	Ascomycota	1	Sordariomycetes	0.96	NA	NA	NA	NA	NA	NA	NA	NA	NA
JQ760444	FL0790	ARIZ:FL0790	195	574	FLA	C3	Quercus inopina	Angiospermae	Fagaceae	Endophyte	Dothideomycetes (Pleosporales)	Fungi	1	Ascomycota	1	Dothideomycetes	1	Pleosporales	1	Massarinaceae	1	Helminthosporium	1	Helminthosporium sp	SH225548.06FU	1
JQ760445	FL0792	ARIZ:FL0792	96	443	FLA	C3	Quercus inopina	Angiospermae	Fagaceae	Endophyte	Sordariomycetes (Diaporthales)	Fungi	1	Ascomycota	1	Sordariomycetes	1	Diaporthales	1	Gnomoniaceae	1	Gnomonia	1	Gnomoniopsis paraclavulata	SH129087.06FU	1
JQ760446	FL0793	ARIZ:FL0793	96	443	FLA	C3	Quercus inopina	Angiospermae	Fagaceae	Endophyte	Sordariomycetes (Diaporthales)	Fungi	1	Ascomycota	1	Sordariomycetes	1	Diaporthales	1	Gnomoniaceae	1	Gnomonia	1	Gnomoniopsis paraclavulata	SH129087.06FU	1
JQ760447	FL0794	ARIZ:FL0794	150	418	FLA	C3	Quercus inopina	Angiospermae	Fagaceae	Endophyte	N/A	Fungi	1	Ascomycota	1	NA	NA	NA	NA	NA	NA	NA	NA	NA	NA	NA
KX908661	FL1450	ARIZ:FL1450	205	662	FLA	C1	Serenoa repens	Angiospermae	Arecaceae	LLF	Dothideomycetes (N/A)	Fungi	1	Ascomycota	1	Dothideomycetes	1	NA	NA	NA	NA	NA	NA	NA	SH238906.06FU	1
KU683820	FL1452	ARIZ:FL1452	132	381	FLA	C1	Serenoa repens	Angiospermae	Arecaceae	LLF	Sordariomycetes (Xylariales)	Fungi	1	Ascomycota	1	Sordariomycetes	1	Xylariales	1	NA	NA	NA	NA	NA	SH225513.06FU	1
KU683821	FL1453	ARIZ:FL1453	184	544	FLA	C1	Serenoa repens	Angiospermae	Arecaceae	LLF	Sordariomycetes (N/A)	Fungi	1	Ascomycota	1	Sordariomycetes	1	NA	NA	NA	NA	NA	NA	NA	SH231234.06FU	1
KX908662	FL1454	ARIZ:FL1454	206	663	FLA	C1	Serenoa repens	Angiospermae	Arecaceae	LLF	Dothideomycetes (Pleosporales)	Fungi	1	Ascomycota	1	Dothideomycetes	1	Pleosporales	1	Lophiostomataceae	1	Lophiostoma	1	Lophiostoma fuckelii	SH237048.06FU	1
KX908663	FL1455	ARIZ:FL1455	207	664	FLA	C1	Serenoa repens	Angiospermae	Arecaceae	LLF	Sordariomycetes (Sordariomycetes_unidentified)	Fungi	1	Ascomycota	1	Sordariomycetes	0.99	Sordariomycetes unidentified	0.82	Sordariomycetes unidentified 1	0.82	Sordariomycetes unidentified 1	0.82	NA	NA	NA
KX908664	FL1456	ARIZ:FL1456	208	665	FLA	C1	Serenoa repens	Angiospermae	Arecaceae	LLF	Dothideomycetes (N/A)	Fungi	1	Ascomycota	1	Dothideomycetes	0.98	NA	NA	NA	NA	NA	NA	NA	NA	NA
KX908665	FL1457	ARIZ:FL1457	209	666	FLA	C1	Serenoa repens	Angiospermae	Arecaceae	LLF	Dothideomycetes (Pleosporales)	Fungi	1	Ascomycota	1	Dothideomycetes	1	Pleosporales	1	Cucurbitariaceae	1	Curreya	1	Curreya austroafricana	SH206678.06FU	1
KU683822	FL1458	ARIZ:FL1458	199	580	FLA	C1	Serenoa repens	Angiospermae	Arecaceae	LLF	Sordariomycetes (Xylariales)	Fungi	1	Ascomycota	1	Sordariomycetes	1	Xylariales	1	Xylariaceae	0.8	NA	NA	NA	SH194579.06FU	0.8
KX908666	FL1459	ARIZ:FL1459	307	667	FLA	C1	Serenoa repens	Angiospermae	Arecaceae	LLF	Dothideomycetes (N/A)	Fungi	1	Ascomycota	1	Dothideomycetes	1	NA	NA	NA	NA	NA	NA	NA	NA	NA
KX908667	FL1460	ARIZ:FL1460	145	411	FLA	C1	Serenoa repens	Angiospermae	Arecaceae	LLF	N/A	Fungi	1	Ascomycota	1	NA	NA	NA	NA	NA	NA	NA	NA	NA	NA	NA
KX908668	FL1461	ARIZ:FL1461	307	667	FLA	C1	Serenoa repens	Angiospermae	Arecaceae	LLF	N/A	Fungi	1	Ascomycota	0.94	Dothideomycetes	1	NA	NA	NA	NA	NA	NA	NA	NA	NA
KX908669	FL1463	ARIZ:FL1463	180	535	FLA	C1	Serenoa repens	Angiospermae	Arecaceae	LLF	Sordariomycetes (Sordariomycetes)	Fungi	1	Ascomycota	1	Sordariomycetes	1	Sordariomycetes unidentified	0.93	Sordariomycetes unidentified 1	0.93	Sordariomycetes unidentified 1	0.93	NA	NA	NA
KX908670	FL1467	ARIZ:FL1467	206	668	FLA	C1	Serenoa repens	Angiospermae	Arecaceae	LLF	Dothideomycetes (Pleosporales)	Fungi	1	Ascomycota	1	Dothideomycetes	1	Pleosporales	1	Lophiostomataceae	1	Lophiostoma	1	Lophiostoma fuckelii	SH237048.06FU	1
KU683823	FL1468	ARIZ:FL1468	187	599	FLA	C1	Serenoa repens	Angiospermae	Arecaceae	LLF	Sordariomycetes (N/A)	Fungi	1	Ascomycota	1	Sordariomycetes	1	NA	NA	NA	NA	NA	NA	NA	SH239367.06FU	1
KX908671	FL1469	ARIZ:FL1469	206	668	FLA	C1	Serenoa repens	Angiospermae	Arecaceae	LLF	Dothideomycetes (Pleosporales)	Fungi	1	Ascomycota	1	Dothideomycetes	1	Pleosporales	1	Lophiostomataceae	1	Lophiostoma	1	Lophiostoma fuckelii	SH237048.06FU	1
KX908672	FL1471	ARIZ:FL1471	209	666	FLA	C1	Serenoa repens	Angiospermae	Arecaceae	LLF	Dothideomycetes (Pleosporales)	Fungi	1	Ascomycota	1	Dothideomycetes	1	Pleosporales	0.99	Cucurbitariaceae	0.99	Curreya	0.99	Curreya austroafricana	SH206678.06FU	0.99
KX908673	FL1472	ARIZ:FL1472	193	569	FLA	C1	Serenoa repens	Angiospermae	Arecaceae	LLF	Dothideomycetes (Pleosporales)	Fungi	1	Ascomycota	1	Dothideomycetes	1	Pleosporales	1	Lophiostomataceae	1	Lophiostoma	1	Lophiostoma sp OUCMBI101098	SH195482.06FU	1
KX908674	FL1474	ARIZ:FL1474	179	517	FLA	C1	Serenoa repens	Angiospermae	Arecaceae	LLF	Dothideomycetes (N/A)	Fungi	1	Ascomycota	1	Dothideomycetes	1	NA	NA	NA	NA	NA	NA	NA	SH238906.06FU	1
KX908675	FL1475	ARIZ:FL1475	210	669	FLA	C1	Serenoa repens	Angiospermae	Arecaceae	LLF	Sordariomycetes (N/A)	Fungi	1	Ascomycota	1	Sordariomycetes	0.87	NA	NA	NA	NA	NA	NA	NA	NA	NA
KU683824	FL1476	ARIZ:FL1476	184	544	FLA	C1	Serenoa repens	Angiospermae	Arecaceae	LLF	Sordariomycetes (N/A)	Fungi	1	Ascomycota	1	Sordariomycetes	1	NA	NA	NA	NA	NA	NA	NA	SH231234.06FU	1
KX908676	FL1478	ARIZ:FL1478	209	666	FLA	C1	Serenoa repens	Angiospermae	Arecaceae	LLF	Dothideomycetes (Pleosporales)	Fungi	1	Ascomycota	1	Dothideomycetes	1	Pleosporales	0.97	Cucurbitariaceae	0.95	Curreya	0.95	Curreya austroafricana	SH206678.06FU	0.95
KX908677	FL1479	ARIZ:FL1479	205	662	FLA	C1	Serenoa repens	Angiospermae	Arecaceae	LLF	Dothideomycetes (N/A)	Fungi	1	Ascomycota	1	Dothideomycetes	1	NA	NA	NA	NA	NA	NA	NA	SH238906.06FU	1
KX908678	FL1480	ARIZ:FL1480	211	670	FLA	C1	Serenoa repens	Angiospermae	Arecaceae	LLF	Dothideomycetes (Pleosporales)	Fungi	1	Ascomycota	1	Dothideomycetes	1	Pleosporales	0.91	Cucurbitariaceae	0.89	Curreya	0.89	Curreya austroafricana	SH206678.06FU	0.89
KX908889	FL1481	ARIZ:FL1481	13	506	FLA	C1	Pinus elliottii	Pinophyta	Pinaceae	LLF	Sordariomycetes (N/A)	Fungi	1	Ascomycota	1	Sordariomycetes	1	NA	NA	NA	NA	NA	NA	NA	SH226454.06FU	1
KU683825	FL1482	ARIZ:FL1482	187	599	FLA	C1	Pinus elliottii	Pinophyta	Pinaceae	LLF	Sordariomycetes (N/A)	Fungi	1	Ascomycota	1	Sordariomycetes	1	NA	NA	NA	NA	NA	NA	NA	SH239367.06FU	1
KX908890	FL1483	ARIZ:FL1483	6	401	FLA	C1	Pinus elliottii	Pinophyta	Pinaceae	LLF	Sordariomycetes (N/A)	Fungi	1	Ascomycota	1	Sordariomycetes	1	Coniochaetales	1	Coniochaetaceae	1	Lecythophora	1	Lecythophora hoffmannii	SH226442.06FU	1
KX908891	FL1485	ARIZ:FL1485	141	671	FLA	C1	Pinus elliottii	Pinophyta	Pinaceae	LLF	Leotiomycetes (Rhytismatales)	Fungi	1	Ascomycota	1	Leotiomycetes	1	Rhytismatales	1	Rhytismataceae	1	Lophodermium	1	Lophodermium sp	SH198383.06FU	1
KU683826	FL1486	ARIZ:FL1486	187	599	FLA	C1	Pinus elliottii	Pinophyta	Pinaceae	LLF	Sordariomycetes (N/A)	Fungi	1	Ascomycota	1	Sordariomycetes	1	NA	NA	NA	NA	NA	NA	NA	SH239367.06FU	1
KU683827	FL1487	ARIZ:FL1487	187	548	FLA	C1	Pinus elliottii	Pinophyta	Pinaceae	LLF	Sordariomycetes (N/A)	Fungi	1	Ascomycota	1	Sordariomycetes	1	NA	NA	NA	NA	NA	NA	NA	SH239367.06FU	1
KX908892	FL1488	ARIZ:FL1488	141	400	FLA	C1	Pinus elliottii	Pinophyta	Pinaceae	LLF	Leotiomycetes (Rhytismatales)	Fungi	1	Ascomycota	1	Leotiomycetes	1	Rhytismatales	1	Rhytismataceae	1	Lophodermium	1	Lophodermium sp	SH198383.06FU	1
KX908893	FL1489	ARIZ:FL1489	141	400	FLA	C1	Pinus elliottii	Pinophyta	Pinaceae	LLF	Leotiomycetes (Rhytismatales)	Fungi	1	Ascomycota	1	Leotiomycetes	1	Rhytismatales	1	Rhytismataceae	1	Lophodermium	1	Lophodermium sp	SH198383.06FU	1
KX908894	FL1490	ARIZ:FL1490	155	431	FLA	C1	Pinus elliottii	Pinophyta	Pinaceae	LLF	N/A	Fungi	1	Ascomycota	1	Sordariomycetes	1	NA	NA	NA	NA	NA	NA	NA	SH226441.06FU	0.99
KX908895	FL1491	ARIZ:FL1491	141	402	FLA	C1	Pinus elliottii	Pinophyta	Pinaceae	LLF	Leotiomycetes (Rhytismatales)	Fungi	1	Ascomycota	1	Leotiomycetes	1	Rhytismatales	1	Rhytismataceae	1	Lophodermium	1	Lophodermium sp	SH198383.06FU	1
KX908896	FL1492	ARIZ:FL1492	141	400	FLA	C1	Pinus elliottii	Pinophyta	Pinaceae	LLF	Leotiomycetes (Rhytismatales)	Fungi	1	Ascomycota	1	Leotiomycetes	1	Rhytismatales	1	Rhytismataceae	1	Lophodermium	1	Lophodermium sp	SH198383.06FU	1
KX908897	FL1493	ARIZ:FL1493	212	672	FLA	C1	Pinus elliottii	Pinophyta	Pinaceae	LLF	Sordariomycetes (N/A)	Fungi	1	Ascomycota	0.93	Sordariomycetes	0.84	Xylariales	0.8	NA	NA	NA	NA	NA	NA	NA
KX908898	FL1494	ARIZ:FL1494	141	400	FLA	C1	Pinus elliottii	Pinophyta	Pinaceae	LLF	Leotiomycetes (Rhytismatales)	Fungi	1	Ascomycota	1	Leotiomycetes	1	Rhytismatales	1	Rhytismataceae	1	Lophodermium	1	Lophodermium sp	SH198383.06FU	1
KU683828	FL1495	ARIZ:FL1495	174	489	FLA	C1	Pinus elliottii	Pinophyta	Pinaceae	LLF	Sordariomycetes (N/A)	Fungi	1	Ascomycota	1	Sordariomycetes	1	NA	NA	NA	NA	NA	NA	NA	SH223929.06FU	1
KX908899	FL1496	ARIZ:FL1496	141	455	FLA	C1	Pinus elliottii	Pinophyta	Pinaceae	LLF	Leotiomycetes (Rhytismatales)	Fungi	1	Ascomycota	1	Leotiomycetes	1	Rhytismatales	1	Rhytismataceae	1	Lophodermium	1	Lophodermium sp	SH198383.06FU	1
KX908900	FL1497	ARIZ:FL1497	57	255	FLA	C1	Pinus elliottii	Pinophyta	Pinaceae	LLF	Dothideomycetes (N/A)	Fungi	1	Ascomycota	1	Dothideomycetes	1	Pleosporales	0.94	Sporormiaceae	0.94	NA	NA	NA	SH190472.06FU	1
KX908901	FL1498	ARIZ:FL1498	142	447	FLA	C1	Pinus elliottii	Pinophyta	Pinaceae	LLF	Sordariomycetes (Trichosphaeriales)	Fungi	1	Ascomycota	1	Sordariomycetes	1	Trichosphaeriales	1	Incertae sedis 26	0.96	Nigrospora	0.83	Nigrospora sp 5 MU 2012	SH237079.06FU	0.94
KX908902	FL1499	ARIZ:FL1499	212	672	FLA	C1	Pinus elliottii	Pinophyta	Pinaceae	LLF	Sordariomycetes (N/A)	Fungi	1	Ascomycota	0.93	Sordariomycetes	0.84	Xylariales	0.8	NA	NA	NA	NA	NA	NA	NA
KX908903	FL1500	ARIZ:FL1500	213	673	FLA	C1	Pinus elliottii	Pinophyta	Pinaceae	LLF	Dothideomycetes (Capnodiales)	Fungi	1	Ascomycota	1	Dothideomycetes	1	Capnodiales	1	Teratosphaeriaceae	1	Teratosphaeria	1	Teratosphaeria marasasii	SH238961.06FU	1
KX908904	FL1501	ARIZ:FL1501	141	400	FLA	C1	Pinus elliottii	Pinophyta	Pinaceae	LLF	Leotiomycetes (Rhytismatales)	Fungi	1	Ascomycota	1	Leotiomycetes	1	Rhytismatales	1	Rhytismataceae	1	Lophodermium	1	Lophodermium sp	SH198383.06FU	1
KX908905	FL1502	ARIZ:FL1502	141	400	FLA	C1	Pinus elliottii	Pinophyta	Pinaceae	LLF	Leotiomycetes (Rhytismatales)	Fungi	1	Ascomycota	1	Leotiomycetes	1	Rhytismatales	1	Rhytismataceae	1	Lophodermium	1	Lophodermium sp	SH198383.06FU	1
KX908906	FL1503	ARIZ:FL1503	214	674	FLA	C1	Pinus elliottii	Pinophyta	Pinaceae	LLF	Dothideomycetes (Pleosporales)	Fungi	1	Ascomycota	1	Dothideomycetes	1	Pleosporales	1	Lophiostomataceae	0.94	Lophiostoma	0.94	Lophiostoma sp	SH235594.06FU	0.94
KX908907	FL1504	ARIZ:FL1504	141	400	FLA	C1	Pinus elliottii	Pinophyta	Pinaceae	LLF	Leotiomycetes (Rhytismatales)	Fungi	1	Ascomycota	1	Leotiomycetes	1	Rhytismatales	1	Rhytismataceae	1	Lophodermium	1	Lophodermium sp	SH198383.06FU	1
KU683829	FL1505	ARIZ:FL1505	165	453	FLA	C1	Pinus elliottii	Pinophyta	Pinaceae	LLF	Sordariomycetes (Xylariales)	Fungi	1	Ascomycota	1	Sordariomycetes	1	Xylariales	1	Xylariaceae	1	Nemania	1	Nemania abortiva	SH240860.06FU	1
KX908908	FL1506	ARIZ:FL1506	141	400	FLA	C1	Pinus elliottii	Pinophyta	Pinaceae	LLF	Leotiomycetes (Rhytismatales)	Fungi	1	Ascomycota	1	Leotiomycetes	1	Rhytismatales	1	Rhytismataceae	1	Lophodermium	1	Lophodermium sp	SH198383.06FU	1
KU683830	FL1507	ARIZ:FL1507	132	409	FLA	C1	Pinus elliottii	Pinophyta	Pinaceae	LLF	Sordariomycetes (Xylariales)	Fungi	1	Ascomycota	1	Sordariomycetes	1	Xylariales	1	NA	NA	NA	NA	NA	SH225513.06FU	1
KX908909	FL1509	ARIZ:FL1509	141	400	FLA	C1	Pinus elliottii	Pinophyta	Pinaceae	LLF	Leotiomycetes (Rhytismatales)	Fungi	1	Ascomycota	1	Leotiomycetes	1	Rhytismatales	1	Rhytismataceae	1	Lophodermium	1	Lophodermium sp	SH198383.06FU	1
KX908910	FL1510	ARIZ:FL1510	141	675	FLA	C1	Pinus elliottii	Pinophyta	Pinaceae	LLF	Leotiomycetes (Rhytismatales)	Fungi	1	Ascomycota	1	Leotiomycetes	1	Rhytismatales	1	Rhytismataceae	1	Lophodermium	1	Lophodermium sp	SH198383.06FU	1
KU683831	FL1511	ARIZ:FL1511	187	599	FLA	C1	Pinus elliottii	Pinophyta	Pinaceae	LLF	Sordariomycetes (N/A)	Fungi	1	Ascomycota	1	Sordariomycetes	1	NA	NA	NA	NA	NA	NA	NA	SH239367.06FU	1
KX908911	FL1512	ARIZ:FL1512	141	400	FLA	C1	Pinus elliottii	Pinophyta	Pinaceae	LLF	Leotiomycetes (Rhytismatales)	Fungi	1	Ascomycota	1	Leotiomycetes	1	Rhytismatales	1	Rhytismataceae	1	Lophodermium	1	Lophodermium sp	SH198383.06FU	1
KX908912	FL1514	ARIZ:FL1514	141	676	FLA	C1	Pinus elliottii	Pinophyta	Pinaceae	LLF	Leotiomycetes (Rhytismatales)	Fungi	1	Ascomycota	1	Leotiomycetes	1	Rhytismatales	1	Rhytismataceae	1	Lophodermium	1	Lophodermium sp	SH198383.06FU	1
KU683832	FL1515	ARIZ:FL1515	165	453	FLA	C1	Pinus elliottii	Pinophyta	Pinaceae	LLF	Sordariomycetes (Xylariales)	Fungi	1	Ascomycota	1	Sordariomycetes	1	Xylariales	1	Xylariaceae	1	Nemania	1	Nemania abortiva	SH240860.06FU	1
KX908949	FL1516	ARIZ:FL1516	141	400	FLA	C1	Pinus elliottii	Pinophyta	Pinaceae	LLF	Leotiomycetes (Rhytismatales)	Fungi	1	Ascomycota	1	Leotiomycetes	1	Rhytismatales	1	Rhytismataceae	1	Lophodermium	1	Lophodermium sp	SH198383.06FU	1
KX908913	FL1517	ARIZ:FL1517	141	400	FLA	C1	Pinus elliottii	Pinophyta	Pinaceae	LLF	Leotiomycetes (Rhytismatales)	Fungi	1	Ascomycota	1	Leotiomycetes	1	Rhytismatales	1	Rhytismataceae	1	Lophodermium	1	Lophodermium sp	SH198383.06FU	1
KU683833	FL1518	ARIZ:FL1518	148	414	FLA	C1	Pinus elliottii	Pinophyta	Pinaceae	LLF	Sordariomycetes (N/A)	Fungi	1	Ascomycota	1	Sordariomycetes	1	NA	NA	NA	NA	NA	NA	NA	SH237996.06FU	1
KX908914	FL1520	ARIZ:FL1520	141	671	FLA	C1	Pinus elliottii	Pinophyta	Pinaceae	LLF	Leotiomycetes (Rhytismatales)	Fungi	1	Ascomycota	1	Leotiomycetes	1	Rhytismatales	1	Rhytismataceae	1	Lophodermium	1	Lophodermium sp	SH198383.06FU	1
KU683834	FL1521	ARIZ:FL1521	136	520	FLA	C1	Pinus elliottii	Pinophyta	Pinaceae	LLF	Sordariomycetes (Xylariales)	Fungi	1	Ascomycota	1	Sordariomycetes	1	Xylariales	1	Xylariaceae	1	Xylaria	1	Xylaria sp F 065,308	SH193313.06FU	1
KU683835	FL1522	ARIZ:FL1522	198	642	FLA	C1	Pinus elliottii	Pinophyta	Pinaceae	LLF	Sordariomycetes (Xylariales)	Fungi	1	Ascomycota	1	Sordariomycetes	1	Xylariales	1	NA	NA	NA	NA	NA	NA	NA
KX908915	FL1523	ARIZ:FL1523	141	400	FLA	C1	Pinus elliottii	Pinophyta	Pinaceae	LLF	Leotiomycetes (Rhytismatales)	Fungi	1	Ascomycota	1	Leotiomycetes	1	Rhytismatales	1	Rhytismataceae	1	Lophodermium	1	Lophodermium sp	SH198383.06FU	1
KU683836	FL1525	ARIZ:FL1525	161	444	FLA	C1	Pinus elliottii	Pinophyta	Pinaceae	LLF	Sordariomycetes (Xylariales)	Fungi	1	Ascomycota	1	Sordariomycetes	1	Xylariales	1	Xylariaceae	1	Xylaria	1	Xylaria sp	SH240861.06FU	1
KX908916	FL1526	ARIZ:FL1526	141	677	FLA	C1	Pinus elliottii	Pinophyta	Pinaceae	LLF	Leotiomycetes (Rhytismatales)	Fungi	1	Ascomycota	1	Leotiomycetes	1	Rhytismatales	1	Rhytismataceae	1	Lophodermium	1	Lophodermium sp	SH198383.06FU	1
KU683837	FL1527	ARIZ:FL1527	132	393	FLA	C1	Quercus inopina	Angiospermae	Fagaceae	LLF	Sordariomycetes (Xylariales)	Fungi	1	Ascomycota	1	Sordariomycetes	1	Xylariales	1	NA	NA	NA	NA	NA	SH225513.06FU	1
KU683838	FL1528	ARIZ:FL1528	132	393	FLA	C1	Quercus inopina	Angiospermae	Fagaceae	LLF	Sordariomycetes (Xylariales)	Fungi	1	Ascomycota	1	Sordariomycetes	1	Xylariales	1	NA	NA	NA	NA	NA	SH225513.06FU	1
KU683839	FL1529	ARIZ:FL1529	133	383	FLA	C1	Quercus inopina	Angiospermae	Fagaceae	LLF	Sordariomycetes (Xylariales)	Fungi	1	Ascomycota	1	Sordariomycetes	1	Xylariales	1	NA	NA	NA	NA	NA	SH194577.06FU	1
KU683840	FL1530	ARIZ:FL1530	132	409	FLA	C1	Quercus inopina	Angiospermae	Fagaceae	LLF	Sordariomycetes (Xylariales)	Fungi	1	Ascomycota	1	Sordariomycetes	1	Xylariales	1	NA	NA	NA	NA	NA	SH225513.06FU	1
KX909008	FL1532	ARIZ:FL1532	135	607	FLA	C1	Quercus inopina	Angiospermae	Fagaceae	LLF	Pezizomycetes (Pezizales)	Fungi	1	Ascomycota	1	Pezizomycetes	1	Pezizales	1	NA	NA	NA	NA	NA	SH218399.06FU	1
KX909009	FL1536	ARIZ:FL1536	13	506	FLA	C1	Quercus inopina	Angiospermae	Fagaceae	LLF	Sordariomycetes (N/A)	Fungi	1	Ascomycota	1	Sordariomycetes	1	NA	NA	NA	NA	NA	NA	NA	SH226454.06FU	1
KU683841	FL1539	ARIZ:FL1539	112	678	FLA	C1	Quercus inopina	Angiospermae	Fagaceae	LLF	Sordariomycetes (Xylariales)	Fungi	1	Ascomycota	1	Sordariomycetes	1	Xylariales	0.94	Xylariaceae	0.94	Xylaria	0.94	Xylaria sp AX114	SH230328.06FU	0.94
KU683842	FL1540	ARIZ:FL1540	133	383	FLA	C1	Quercus inopina	Angiospermae	Fagaceae	LLF	Sordariomycetes (Xylariales)	Fungi	1	Ascomycota	1	Sordariomycetes	1	Xylariales	1	NA	NA	NA	NA	NA	SH194577.06FU	1
KU683843	FL1541	ARIZ:FL1541	140	488	FLA	C1	Quercus inopina	Angiospermae	Fagaceae	LLF	Sordariomycetes (Xylariales)	Fungi	1	Ascomycota	1	Sordariomycetes	1	Xylariales	1	Xylariaceae	1	Xylaria	1	Xylaria sp	SH223881.06FU	1
KX908753	FL1542	ARIZ:FL1542	141	400	FLA	C1	Pinus clausa	Pinophyta	Pinaceae	LLF	Leotiomycetes (Rhytismatales)	Fungi	1	Ascomycota	1	Leotiomycetes	1	Rhytismatales	1	Rhytismataceae	1	Lophodermium	1	Lophodermium sp	SH198383.06FU	1
KX908754	FL1543	ARIZ:FL1543	102	478	FLA	C1	Pinus clausa	Pinophyta	Pinaceae	LLF	Pezizomycetes (N/A)	Fungi	1	Ascomycota	1	Pezizomycetes	1	NA	NA	NA	NA	NA	NA	NA	SH212259.06FU	1
KX908755	FL1544	ARIZ:FL1544	141	400	FLA	C1	Pinus clausa	Pinophyta	Pinaceae	LLF	Leotiomycetes (Rhytismatales)	Fungi	1	Ascomycota	1	Leotiomycetes	1	Rhytismatales	1	Rhytismataceae	1	Lophodermium	1	Lophodermium sp	SH198383.06FU	1
KX908756	FL1545	ARIZ:FL1545	135	482	FLA	C1	Pinus clausa	Pinophyta	Pinaceae	LLF	Pezizomycetes (Pezizales)	Fungi	1	Ascomycota	1	Pezizomycetes	1	Pezizales	1	NA	NA	NA	NA	NA	SH218399.06FU	1
KX908757	FL1546	ARIZ:FL1546	135	525	FLA	C1	Pinus clausa	Pinophyta	Pinaceae	LLF	Pezizomycetes (N/A)	Fungi	1	Ascomycota	1	Pezizomycetes	1	Pezizales	1	NA	NA	NA	NA	NA	SH218400.06FU	1
KX908758	FL1547	ARIZ:FL1547	141	400	FLA	C1	Pinus clausa	Pinophyta	Pinaceae	LLF	Leotiomycetes (Rhytismatales)	Fungi	1	Ascomycota	1	Leotiomycetes	1	Rhytismatales	1	Rhytismataceae	1	Lophodermium	1	Lophodermium sp	SH198383.06FU	1
KX908759	FL1548	ARIZ:FL1548	141	400	FLA	C1	Pinus clausa	Pinophyta	Pinaceae	LLF	Leotiomycetes (Rhytismatales)	Fungi	1	Ascomycota	1	Leotiomycetes	1	Rhytismatales	1	Rhytismataceae	1	Lophodermium	1	Lophodermium sp	SH198383.06FU	1
KX908760	FL1549	ARIZ:FL1549	141	400	FLA	C1	Pinus clausa	Pinophyta	Pinaceae	LLF	Leotiomycetes (Rhytismatales)	Fungi	1	Ascomycota	1	Leotiomycetes	1	Rhytismatales	1	Rhytismataceae	1	Lophodermium	1	Lophodermium sp	SH198383.06FU	1
KX908761	FL1550	ARIZ:FL1550	135	388	FLA	C1	Pinus clausa	Pinophyta	Pinaceae	LLF	Pezizomycetes (Pezizales)	Fungi	1	Ascomycota	1	Pezizomycetes	1	Pezizales	1	NA	NA	NA	NA	NA	SH218399.06FU	1
KX908762	FL1551	ARIZ:FL1551	141	402	FLA	C1	Pinus clausa	Pinophyta	Pinaceae	LLF	Leotiomycetes (Rhytismatales)	Fungi	1	Ascomycota	1	Leotiomycetes	1	Rhytismatales	1	Rhytismataceae	1	Lophodermium	1	Lophodermium sp	SH198383.06FU	1
KX908763	FL1552	ARIZ:FL1552	141	455	FLA	C1	Pinus clausa	Pinophyta	Pinaceae	LLF	Leotiomycetes (Rhytismatales)	Fungi	1	Ascomycota	1	Leotiomycetes	1	Rhytismatales	1	Rhytismataceae	0.99	Lophodermium	0.99	Lophodermium sp	SH198383.06FU	0.99
KX908764	FL1553	ARIZ:FL1553	141	676	FLA	C1	Pinus clausa	Pinophyta	Pinaceae	LLF	Leotiomycetes (Rhytismatales)	Fungi	1	Ascomycota	1	Leotiomycetes	1	Rhytismatales	1	Rhytismataceae	1	Lophodermium	1	Lophodermium sp	SH198383.06FU	1
KX908765	FL1554	ARIZ:FL1554	82	442	FLA	C1	Pinus clausa	Pinophyta	Pinaceae	LLF	Dothideomycetes (Pleosporales)	Fungi	1	Ascomycota	1	Dothideomycetes	1	Pleosporales	1	NA	NA	NA	NA	NA	SH230642.06FU	1
KX908766	FL1555	ARIZ:FL1555	215	679	FLA	C1	Pinus clausa	Pinophyta	Pinaceae	LLF	Leotiomycetes (N/A)	Fungi	1	Ascomycota	1	Leotiomycetes	1	NA	NA	NA	NA	NA	NA	NA	NA	NA
KX908767	FL1556	ARIZ:FL1556	135	387	FLA	C1	Pinus clausa	Pinophyta	Pinaceae	LLF	Pezizomycetes (Pezizales)	Fungi	1	Ascomycota	1	Pezizomycetes	1	Pezizales	1	NA	NA	NA	NA	NA	SH218399.06FU	1
KX908768	FL1557	ARIZ:FL1557	141	400	FLA	C1	Pinus clausa	Pinophyta	Pinaceae	LLF	Leotiomycetes (Rhytismatales)	Fungi	1	Ascomycota	1	Leotiomycetes	1	Rhytismatales	1	Rhytismataceae	1	Lophodermium	1	Lophodermium sp	SH198383.06FU	1
KU683844	FL1558	ARIZ:FL1558	133	383	FLA	C1	Pinus clausa	Pinophyta	Pinaceae	LLF	Sordariomycetes (Xylariales)	Fungi	1	Ascomycota	1	Sordariomycetes	1	Xylariales	1	NA	NA	NA	NA	NA	SH194577.06FU	1
KX908769	FL1559	ARIZ:FL1559	141	676	FLA	C1	Pinus clausa	Pinophyta	Pinaceae	LLF	Leotiomycetes (Rhytismatales)	Fungi	1	Ascomycota	1	Leotiomycetes	1	Rhytismatales	1	Rhytismataceae	1	Lophodermium	1	Lophodermium sp	SH198383.06FU	1
KX908770	FL1560	ARIZ:FL1560	135	525	FLA	C1	Pinus clausa	Pinophyta	Pinaceae	LLF	Pezizomycetes (N/A)	Fungi	1	Ascomycota	1	Pezizomycetes	1	Pezizales	1	NA	NA	NA	NA	NA	SH218400.06FU	1
KX908771	FL1561	ARIZ:FL1561	135	390	FLA	C1	Pinus clausa	Pinophyta	Pinaceae	LLF	Pezizomycetes (Pezizales)	Fungi	1	Ascomycota	1	Pezizomycetes	1	Pezizales	1	NA	NA	NA	NA	NA	SH218399.06FU	1
KX908772	FL1562	ARIZ:FL1562	215	680	FLA	C1	Pinus clausa	Pinophyta	Pinaceae	LLF	Leotiomycetes (N/A)	Fungi	1	Ascomycota	1	Leotiomycetes	1	NA	NA	NA	NA	NA	NA	NA	NA	NA
KX908773	FL1563	ARIZ:FL1563	141	400	FLA	C1	Pinus clausa	Pinophyta	Pinaceae	LLF	Leotiomycetes (Rhytismatales)	Fungi	1	Ascomycota	1	Leotiomycetes	1	Rhytismatales	1	Rhytismataceae	1	Lophodermium	1	Lophodermium sp	SH198383.06FU	1
KX908774	FL1564	ARIZ:FL1564	141	400	FLA	C1	Pinus clausa	Pinophyta	Pinaceae	LLF	Leotiomycetes (Rhytismatales)	Fungi	1	Ascomycota	1	Leotiomycetes	1	Rhytismatales	1	Rhytismataceae	1	Lophodermium	1	Lophodermium sp	SH198383.06FU	1
KX908775	FL1565	ARIZ:FL1565	141	400	FLA	C1	Pinus clausa	Pinophyta	Pinaceae	LLF	Leotiomycetes (Rhytismatales)	Fungi	1	Ascomycota	1	Leotiomycetes	1	Rhytismatales	1	Rhytismataceae	1	Lophodermium	1	Lophodermium sp	SH198383.06FU	1
KX908776	FL1567	ARIZ:FL1567	141	402	FLA	C1	Pinus clausa	Pinophyta	Pinaceae	LLF	Leotiomycetes (Rhytismatales)	Fungi	1	Ascomycota	1	Leotiomycetes	1	Rhytismatales	1	Rhytismataceae	1	Lophodermium	1	Lophodermium sp	SH198383.06FU	1
KX908777	FL1568	ARIZ:FL1568	141	400	FLA	C1	Pinus clausa	Pinophyta	Pinaceae	LLF	Leotiomycetes (Rhytismatales)	Fungi	1	Ascomycota	1	Leotiomycetes	1	Rhytismatales	1	Rhytismataceae	1	Lophodermium	1	Lophodermium sp	SH198383.06FU	1
KX908778	FL1569	ARIZ:FL1569	215	680	FLA	C1	Pinus clausa	Pinophyta	Pinaceae	LLF	Leotiomycetes (N/A)	Fungi	1	Ascomycota	0.96	Leotiomycetes	0.96	NA	NA	NA	NA	NA	NA	NA	NA	NA
KX908779	FL1570	ARIZ:FL1570	215	681	FLA	C1	Pinus clausa	Pinophyta	Pinaceae	LLF	Leotiomycetes (N/A)	Fungi	1	Ascomycota	0.99	Leotiomycetes	0.99	NA	NA	NA	NA	NA	NA	NA	NA	NA
KX908780	FL1571	ARIZ:FL1571	102	478	FLA	C1	Pinus clausa	Pinophyta	Pinaceae	LLF	Pezizomycetes (N/A)	Fungi	1	Ascomycota	1	Pezizomycetes	1	NA	NA	NA	NA	NA	NA	NA	SH212259.06FU	1
KX908679	FL1572	ARIZ:FL1572	214	674	FLA	C2	Serenoa repens	Angiospermae	Arecaceae	LLF	Dothideomycetes (Pleosporales)	Fungi	1	Ascomycota	1	Dothideomycetes	1	Pleosporales	1	Lophiostomataceae	0.98	Lophiostoma	0.98	Lophiostoma sp	SH235594.06FU	0.98
KX908680	FL1574	ARIZ:FL1574	65	682	FLA	C2	Serenoa repens	Angiospermae	Arecaceae	LLF	Eurotiomycetes (Eurotiales)	Fungi	1	Ascomycota	1	Eurotiomycetes	1	Eurotiales	1	Trichocomaceae	1	Talaromyces	0.9	Talaromyces flavus	SH225870.06FU	0.9
KU683845	FL1575	ARIZ:FL1575	199	580	FLA	C2	Serenoa repens	Angiospermae	Arecaceae	LLF	Sordariomycetes (Xylariales)	Fungi	1	Ascomycota	1	Sordariomycetes	1	Xylariales	0.99	Xylariaceae	0.8	NA	NA	NA	NA	NA
KU683846	FL1576	ARIZ:FL1576	144	499	FLA	C2	Serenoa repens	Angiospermae	Arecaceae	LLF	Sordariomycetes (Xylariales)	Fungi	1	Ascomycota	1	Sordariomycetes	1	Xylariales	1	Xylariaceae	1	Xylaria	1	Xylaria sp	SH240406.06FU	1
KX908681	FL1577	ARIZ:FL1577	216	683	FLA	C2	Serenoa repens	Angiospermae	Arecaceae	LLF	Sordariomycetes (N/A)	Fungi	1	Ascomycota	0.99	Sordariomycetes	0.99	NA	NA	NA	NA	NA	NA	NA	NA	NA
KX908682	FL1578	ARIZ:FL1578	141	400	FLA	C2	Serenoa repens	Angiospermae	Arecaceae	LLF	Leotiomycetes (Rhytismatales)	Fungi	1	Ascomycota	1	Leotiomycetes	1	Rhytismatales	1	Rhytismataceae	1	Lophodermium	1	Lophodermium sp	SH198383.06FU	1
KX908683	FL1579	ARIZ:FL1579	217	684	FLA	C2	Serenoa repens	Angiospermae	Arecaceae	LLF	Dothideomycetes (Pleosporales)	Fungi	1	Ascomycota	1	Dothideomycetes	1	Pleosporales	0.8	NA	NA	NA	NA	NA	NA	NA
KX908684	FL1580	ARIZ:FL1580	118	685	FLA	C2	Serenoa repens	Angiospermae	Arecaceae	LLF	Dothideomycetes (Pleosporales)	Fungi	1	Ascomycota	1	Dothideomycetes	1	Pleosporales	1	Lophiostomataceae	0.88	Lophiostoma	0.88	Lophiostoma sp	SH235594.06FU	0.88
KX908685	FL1581	ARIZ:FL1581	218	686	FLA	C2	Serenoa repens	Angiospermae	Arecaceae	LLF	N/A	Fungi	1	Ascomycota	1	NA	NA	NA	NA	NA	NA	NA	NA	NA	NA	NA
KU683847	FL1582	ARIZ:FL1582	112	385	FLA	C2	Serenoa repens	Angiospermae	Arecaceae	LLF	Sordariomycetes (Xylariales)	Fungi	1	Ascomycota	1	Sordariomycetes	1	Xylariales	1	Xylariaceae	1	Xylaria	1	Xylaria sp AX114	SH230328.06FU	1
KX908686	FL1584	ARIZ:FL1584	155	460	FLA	C2	Serenoa repens	Angiospermae	Arecaceae	LLF	Sordariomycetes (N/A)	Fungi	1	Ascomycota	1	Sordariomycetes	1	NA	NA	NA	NA	NA	NA	NA	SH226456.06FU	1
KU683848	FL1585	ARIZ:FL1585	112	382	FLA	C2	Serenoa repens	Angiospermae	Arecaceae	LLF	Sordariomycetes (N/A)	Fungi	1	Ascomycota	1	Sordariomycetes	1	Xylariales	1	Xylariaceae	1	Xylaria	1	Xylaria sp AX114	SH230327.06FU	1
KU683849	FL1587	ARIZ:FL1587	162	501	FLA	C2	Serenoa repens	Angiospermae	Arecaceae	LLF	Sordariomycetes (Xylariales)	Fungi	1	Ascomycota	1	Sordariomycetes	1	Xylariales	1	Xylariaceae	1	Xylaria	1	Xylaria sp	SH240406.06FU	1
KX908687	FL1588	ARIZ:FL1588	218	687	FLA	C2	Serenoa repens	Angiospermae	Arecaceae	LLF	N/A	Fungi	1	Ascomycota	0.99	NA	NA	NA	NA	NA	NA	NA	NA	NA	NA	NA
KX908688	FL1589	ARIZ:FL1589	171	466	FLA	C2	Serenoa repens	Angiospermae	Arecaceae	LLF	Dothideomycetes (N/A)	Fungi	1	Ascomycota	1	Dothideomycetes	1	NA	NA	NA	NA	NA	NA	NA	SH222846.06FU	1
KU683850	FL1590	ARIZ:FL1590	143	527	FLA	C2	Serenoa repens	Angiospermae	Arecaceae	LLF	Sordariomycetes (Xylariales)	Fungi	1	Ascomycota	1	Sordariomycetes	1	Xylariales	1	Xylariaceae	1	Xylaria	1	Xylaria sp	SH240406.06FU	1
KX908689	FL1592	ARIZ:FL1592	212	672	FLA	C2	Serenoa repens	Angiospermae	Arecaceae	LLF	Sordariomycetes (N/A)	Fungi	1	Ascomycota	0.93	Sordariomycetes	0.84	Xylariales	0.8	NA	NA	NA	NA	NA	NA	NA
KX908690	FL1593	ARIZ:FL1593	169	467	FLA	C2	Serenoa repens	Angiospermae	Arecaceae	LLF	Dothideomycetes (N/A)	Fungi	1	Ascomycota	1	Dothideomycetes	1	NA	NA	NA	NA	NA	NA	NA	SH222846.06FU	1
KU683851	FL1594	ARIZ:FL1594	200	583	FLA	C2	Serenoa repens	Angiospermae	Arecaceae	LLF	Sordariomycetes (Xylariales)	Fungi	1	Ascomycota	1	Sordariomycetes	1	Xylariales	1	Xylariaceae	1	Xylaria	1	Xylaria sp	SH201962.06FU	1
KX908691	FL1596	ARIZ:FL1596	118	685	FLA	C2	Serenoa repens	Angiospermae	Arecaceae	LLF	Dothideomycetes (Pleosporales)	Fungi	1	Ascomycota	1	Dothideomycetes	1	Pleosporales	1	Lophiostomataceae	0.88	Lophiostoma	0.88	Lophiostoma sp	SH235594.06FU	0.88
KX908917	FL1597	ARIZ:FL1597	141	688	FLA	C2	Pinus elliottii	Pinophyta	Pinaceae	LLF	Leotiomycetes (Rhytismatales)	Fungi	1	Ascomycota	1	Leotiomycetes	1	Rhytismatales	1	Rhytismataceae	1	Lophodermium	1	Lophodermium sp	SH198383.06FU	1
KX908918	FL1598	ARIZ:FL1598	135	387	FLA	C2	Pinus elliottii	Pinophyta	Pinaceae	LLF	Pezizomycetes (Pezizales)	Fungi	1	Ascomycota	1	Pezizomycetes	1	Pezizales	1	NA	NA	NA	NA	NA	SH218399.06FU	1
KX908919	FL1599	ARIZ:FL1599	141	689	FLA	C2	Pinus elliottii	Pinophyta	Pinaceae	LLF	Leotiomycetes (Rhytismatales)	Fungi	1	Ascomycota	1	Leotiomycetes	1	Rhytismatales	1	Rhytismataceae	1	Lophodermium	1	Lophodermium sp	SH198383.06FU	1
KX908920	FL1600	ARIZ:FL1600	141	676	FLA	C2	Pinus elliottii	Pinophyta	Pinaceae	LLF	Leotiomycetes (Rhytismatales)	Fungi	1	Ascomycota	1	Leotiomycetes	1	Rhytismatales	1	Rhytismataceae	1	Lophodermium	1	Lophodermium sp	SH198383.06FU	1
KX908921	FL1601	ARIZ:FL1601	135	397	FLA	C2	Pinus elliottii	Pinophyta	Pinaceae	LLF	Pezizomycetes (Pezizales)	Fungi	1	Ascomycota	1	Pezizomycetes	1	Pezizales	1	NA	NA	NA	NA	NA	SH218399.06FU	1
KX908922	FL1602	ARIZ:FL1602	141	671	FLA	C2	Pinus elliottii	Pinophyta	Pinaceae	LLF	Leotiomycetes (Rhytismatales)	Fungi	1	Ascomycota	1	Leotiomycetes	1	Rhytismatales	1	Rhytismataceae	1	Lophodermium	1	Lophodermium sp	SH198383.06FU	1
KU683852	FL1607	ARIZ:FL1607	107	477	FLA	C2	Pinus elliottii	Pinophyta	Pinaceae	LLF	Sordariomycetes (N/A)	Fungi	1	Ascomycota	1	Sordariomycetes	1	Xylariales	1	Xylariaceae	1	Xylaria	1	Xylaria sp	SH197605.06FU	1
KU683853	FL1608	ARIZ:FL1608	132	381	FLA	C2	Pinus elliottii	Pinophyta	Pinaceae	LLF	Sordariomycetes (Xylariales)	Fungi	1	Ascomycota	1	Sordariomycetes	1	Xylariales	1	NA	NA	NA	NA	NA	SH225513.06FU	1
KX908923	FL1609	ARIZ:FL1609	141	400	FLA	C2	Pinus elliottii	Pinophyta	Pinaceae	LLF	Leotiomycetes (Rhytismatales)	Fungi	1	Ascomycota	1	Leotiomycetes	1	Rhytismatales	1	Rhytismataceae	1	Lophodermium	1	Lophodermium sp	SH198383.06FU	1
KU683854	FL1610	ARIZ:FL1610	133	383	FLA	C2	Pinus elliottii	Pinophyta	Pinaceae	LLF	Sordariomycetes (Xylariales)	Fungi	1	Ascomycota	1	Sordariomycetes	1	Xylariales	1	NA	NA	NA	NA	NA	SH194577.06FU	1
KX908924	FL1611	ARIZ:FL1611	212	672	FLA	C2	Pinus elliottii	Pinophyta	Pinaceae	LLF	Sordariomycetes (N/A)	Fungi	1	Ascomycota	0.83	Sordariomycetes	0.8	Xylariales	0.8	NA	NA	NA	NA	NA	NA	NA
KX908925	FL1612	ARIZ:FL1612	141	400	FLA	C2	Pinus elliottii	Pinophyta	Pinaceae	LLF	Leotiomycetes (Rhytismatales)	Fungi	1	Ascomycota	1	Leotiomycetes	1	Rhytismatales	1	Rhytismataceae	1	Lophodermium	1	Lophodermium sp	SH198383.06FU	1
KX908926	FL1613	ARIZ:FL1613	141	400	FLA	C2	Pinus elliottii	Pinophyta	Pinaceae	LLF	Leotiomycetes (Rhytismatales)	Fungi	1	Ascomycota	1	Leotiomycetes	1	Rhytismatales	1	Rhytismataceae	1	Lophodermium	1	Lophodermium sp	SH198383.06FU	1
KX908927	FL1614	ARIZ:FL1614	141	690	FLA	C2	Pinus elliottii	Pinophyta	Pinaceae	LLF	Leotiomycetes (Rhytismatales)	Fungi	1	Ascomycota	1	Leotiomycetes	1	Rhytismatales	1	Rhytismataceae	1	Lophodermium	1	Lophodermium sp	SH198383.06FU	1
KX908928	FL1615	ARIZ:FL1615	177	691	FLA	C2	Pinus elliottii	Pinophyta	Pinaceae	LLF	Pezizomycetes (Pezizales)	Fungi	1	Ascomycota	1	Pezizomycetes	1	Pezizales	1	NA	NA	NA	NA	NA	SH218399.06FU	1
KX908929	FL1616	ARIZ:FL1616	141	400	FLA	C2	Pinus elliottii	Pinophyta	Pinaceae	LLF	Leotiomycetes (Rhytismatales)	Fungi	1	Ascomycota	1	Leotiomycetes	1	Rhytismatales	1	Rhytismataceae	1	Lophodermium	1	Lophodermium sp	SH198383.06FU	1
KX908930	FL1617	ARIZ:FL1617	141	400	FLA	C2	Pinus elliottii	Pinophyta	Pinaceae	LLF	Leotiomycetes (Rhytismatales)	Fungi	1	Ascomycota	1	Leotiomycetes	1	Rhytismatales	1	Rhytismataceae	1	Lophodermium	1	Lophodermium sp	SH198383.06FU	1
KX908931	FL1618	ARIZ:FL1618	141	692	FLA	C2	Pinus elliottii	Pinophyta	Pinaceae	LLF	Leotiomycetes (Rhytismatales)	Fungi	1	Ascomycota	1	Leotiomycetes	1	Rhytismatales	1	Rhytismataceae	1	Lophodermium	1	Lophodermium sp	SH198383.06FU	1
KX908932	FL1619	ARIZ:FL1619	141	400	FLA	C2	Pinus elliottii	Pinophyta	Pinaceae	LLF	Leotiomycetes (Rhytismatales)	Fungi	1	Ascomycota	1	Leotiomycetes	1	Rhytismatales	1	Rhytismataceae	1	Lophodermium	1	Lophodermium sp	SH198383.06FU	1
KX908933	FL1620	ARIZ:FL1620	141	693	FLA	C2	Pinus elliottii	Pinophyta	Pinaceae	LLF	Leotiomycetes (Rhytismatales)	Fungi	1	Ascomycota	1	Leotiomycetes	1	Rhytismatales	1	Rhytismataceae	1	Lophodermium	1	Lophodermium sp	SH198383.06FU	1
KX908934	FL1621	ARIZ:FL1621	141	402	FLA	C2	Pinus elliottii	Pinophyta	Pinaceae	LLF	Leotiomycetes (Rhytismatales)	Fungi	1	Ascomycota	1	Leotiomycetes	1	Rhytismatales	1	Rhytismataceae	1	Lophodermium	1	Lophodermium sp	SH198383.06FU	1
KX908935	FL1622	ARIZ:FL1622	141	400	FLA	C2	Pinus elliottii	Pinophyta	Pinaceae	LLF	Leotiomycetes (Rhytismatales)	Fungi	1	Ascomycota	1	Leotiomycetes	1	Rhytismatales	1	Rhytismataceae	1	Lophodermium	1	Lophodermium sp	SH198383.06FU	1
KU683855	FL1623	ARIZ:FL1623	182	694	FLA	C2	Quercus inopina	Angiospermae	Fagaceae	LLF	Sordariomycetes (Xylariales)	Fungi	1	Ascomycota	1	Sordariomycetes	1	Xylariales	1	Xylariaceae	1	Nodulisporium	1	Nodulisporium sp 17 NK 2011	SH216527.06FU	1
KU683856	FL1624	ARIZ:FL1624	133	383	FLA	C2	Quercus inopina	Angiospermae	Fagaceae	LLF	Sordariomycetes (Xylariales)	Fungi	1	Ascomycota	1	Sordariomycetes	1	Xylariales	1	NA	NA	NA	NA	NA	SH194577.06FU	1
KX909010	FL1625	ARIZ:FL1625	219	695	FLA	C2	Quercus inopina	Angiospermae	Fagaceae	LLF	Leotiomycetes (N/A)	Fungi	1	Ascomycota	1	Leotiomycetes	0.9	NA	NA	NA	NA	NA	NA	NA	NA	NA
KX909011	FL1626	ARIZ:FL1626	102	478	FLA	C2	Quercus inopina	Angiospermae	Fagaceae	LLF	Pezizomycetes (N/A)	Fungi	1	Ascomycota	1	Pezizomycetes	1	NA	NA	NA	NA	NA	NA	NA	SH212259.06FU	1
KX909012	FL1627	ARIZ:FL1627	151	421	FLA	C2	Quercus inopina	Angiospermae	Fagaceae	LLF	Sordariomycetes (Sordariales)	Fungi	1	Ascomycota	1	Sordariomycetes	1	Sordariales	1	Chaetomiaceae	1	Chaetomium	1	Chaetomium sp	SH218147.06FU	1
KX909013	FL1628	ARIZ:FL1628	212	672	FLA	C2	Quercus inopina	Angiospermae	Fagaceae	LLF	Sordariomycetes (Xylariales)	Fungi	1	Ascomycota	0.89	Sordariomycetes	0.86	Xylariales	0.8	NA	NA	NA	NA	NA	NA	NA
KU683857	FL1629	ARIZ:FL1629	108	696	FLA	C2	Quercus inopina	Angiospermae	Fagaceae	LLF	N/A	Fungi	1	Ascomycota	1	Incertae sedis 14	0.95	Incertae sedis 15	0.95	Incertae sedis 16	0.95	Polyscytalum	0.95	Polyscytalum sp	SH189863.06FU	0.95
KU683858	FL1630	ARIZ:FL1630	167	458	FLA	C2	Quercus inopina	Angiospermae	Fagaceae	LLF	Sordariomycetes (Xylariales)	Fungi	1	Ascomycota	1	Sordariomycetes	1	Xylariales	1	Xylariaceae	1	Muscodor	1	Muscodor sp	SH227004.06FU	1
KX909014	FL1631	ARIZ:FL1631	220	697	FLA	C2	Quercus inopina	Angiospermae	Fagaceae	LLF	Leotiomycetes (Rhytismatales)	Fungi	1	Ascomycota	1	Leotiomycetes	1	Rhytismatales	0.96	Rhytismataceae	0.96	NA	NA	NA	SH240323.06FU	0.95
KU683859	FL1632	ARIZ:FL1632	143	507	FLA	C2	Quercus inopina	Angiospermae	Fagaceae	LLF	Sordariomycetes (Xylariales)	Fungi	1	Ascomycota	1	Sordariomycetes	1	Xylariales	1	Xylariaceae	1	Xylaria	1	Xylaria sp	SH240406.06FU	1
KX909015	FL1633	ARIZ:FL1633	221	698	FLA	C2	Quercus inopina	Angiospermae	Fagaceae	LLF	N/A	Fungi	1	NA	NA	NA	NA	NA	NA	NA	NA	NA	NA	NA	SH241216.06FU	1
KU683860	FL1634	ARIZ:FL1634	200	583	FLA	C2	Quercus inopina	Angiospermae	Fagaceae	LLF	Sordariomycetes (Xylariales)	Fungi	1	Ascomycota	1	Sordariomycetes	1	Xylariales	1	Xylariaceae	1	Xylaria	1	Xylaria sp	SH201962.06FU	1
KX909016	FL1637	ARIZ:FL1637	222	699	FLA	C2	Quercus inopina	Angiospermae	Fagaceae	LLF	Sordariomycetes (Xylariales)	Fungi	1	Ascomycota	1	Sordariomycetes	1	Xylariales	1	Amphisphaeriaceae	1	Pestalotiopsis	1	Pestalotiopsis sp 7 MU 2012	SH197613.06FU	0.99
KU683861	FL1638	ARIZ:FL1638	108	696	FLA	C2	Quercus inopina	Angiospermae	Fagaceae	LLF	N/A	Fungi	1	Ascomycota	1	Incertae sedis 14	0.95	Incertae sedis 15	0.95	Incertae sedis 16	0.95	Polyscytalum	0.95	Polyscytalum sp	SH189863.06FU	0.95
KX909017	FL1640	ARIZ:FL1640	117	700	FLA	C2	Quercus inopina	Angiospermae	Fagaceae	LLF	Sordariomycetes (Diaporthales)	Fungi	1	Ascomycota	1	Sordariomycetes	1	Diaporthales	1	Gnomoniaceae	1	Gnomonia	1	Gnomoniopsis paraclavulata	SH129087.06FU	1
KU683862	FL1641	ARIZ:FL1641	108	696	FLA	C2	Quercus inopina	Angiospermae	Fagaceae	LLF	N/A	Fungi	1	Ascomycota	1	Incertae sedis 14	0.95	Incertae sedis 15	0.95	Incertae sedis 16	0.95	Polyscytalum	0.95	Polyscytalum sp	SH189863.06FU	0.95
KU683863	FL1642	ARIZ:FL1642	108	696	FLA	C2	Quercus inopina	Angiospermae	Fagaceae	LLF	N/A	Fungi	1	Ascomycota	1	Incertae sedis 14	0.95	Incertae sedis 15	0.95	Incertae sedis 16	0.95	Polyscytalum	0.95	Polyscytalum sp	SH189863.06FU	0.95
KX909018	FL1643	ARIZ:FL1643	223	701	FLA	C2	Quercus inopina	Angiospermae	Fagaceae	LLF	N/A	Fungi	1	Ascomycota	0.94	NA	NA	NA	NA	NA	NA	NA	NA	NA	NA	NA
KU683864	FL1645	ARIZ:FL1645	132	409	FLA	C2	Quercus inopina	Angiospermae	Fagaceae	LLF	Sordariomycetes (Xylariales)	Fungi	1	Ascomycota	1	Sordariomycetes	1	Xylariales	1	NA	NA	NA	NA	NA	SH225513.06FU	1
KX909019	FL1646	ARIZ:FL1646	220	702	FLA	C2	Quercus inopina	Angiospermae	Fagaceae	LLF	Leotiomycetes (Rhytismatales)	Fungi	1	Ascomycota	1	Leotiomycetes	1	Rhytismatales	0.98	Rhytismataceae	0.98	NA	NA	NA	SH240323.06FU	0.97
KU683865	FL1649	ARIZ:FL1649	52	581	FLA	C2	Quercus inopina	Angiospermae	Fagaceae	LLF	Sordariomycetes (Xylariales)	Fungi	1	Ascomycota	1	Sordariomycetes	1	Xylariales	1	Xylariaceae	1	Nemania	1	Nemania sp	SH241719.06FU	1
KU683866	FL1650	ARIZ:FL1650	167	458	FLA	C2	Quercus inopina	Angiospermae	Fagaceae	LLF	Sordariomycetes (Xylariales)	Fungi	1	Ascomycota	1	Sordariomycetes	1	Xylariales	1	Xylariaceae	1	Muscodor	1	Muscodor sp	SH227004.06FU	1
KU683867	FL1651	ARIZ:FL1651	224	703	FLA	C2	Quercus inopina	Angiospermae	Fagaceae	LLF	Sordariomycetes (Xylariales)	Fungi	1	Ascomycota	1	Sordariomycetes	1	Xylariales	0.96	NA	NA	NA	NA	NA	NA	NA
KX909020	FL1652	ARIZ:FL1652	96	443	FLA	C2	Quercus inopina	Angiospermae	Fagaceae	LLF	Sordariomycetes (Diaporthales)	Fungi	1	Ascomycota	1	Sordariomycetes	1	Diaporthales	1	Gnomoniaceae	1	Gnomonia	1	Gnomoniopsis paraclavulata	SH129087.06FU	1
KX909021	FL1659	ARIZ:FL1659	135	525	FLA	C2	Quercus inopina	Angiospermae	Fagaceae	LLF	Pezizomycetes (N/A)	Fungi	1	Ascomycota	1	Pezizomycetes	1	Pezizales	1	NA	NA	NA	NA	NA	SH218400.06FU	1
KU683868	FL1661	ARIZ:FL1661	162	449	FLA	C2	Quercus inopina	Angiospermae	Fagaceae	LLF	Sordariomycetes (Xylariales)	Fungi	1	Ascomycota	1	Sordariomycetes	1	Xylariales	1	Xylariaceae	1	Xylaria	1	Xylaria sp	SH240406.06FU	1
KX909022	FL1663	ARIZ:FL1663	127	659	FLA	C2	Quercus inopina	Angiospermae	Fagaceae	LLF	Dothideomycetes (Pleosporales)	Fungi	1	Ascomycota	1	Dothideomycetes	1	Pleosporales	1	NA	NA	NA	NA	NA	SH197544.06FU	1
KX909023	FL1667	ARIZ:FL1667	225	704	FLA	C2	Quercus inopina	Angiospermae	Fagaceae	LLF	N/A	Fungi	1	Ascomycota	0.81	Eurotiomycetes	0.93	Chaetothyriales	0.93	Herpotrichiellaceae	0.93	NA	NA	NA	NA	NA
KX909024	FL1669	ARIZ:FL1669	226	705	FLA	C2	Quercus inopina	Angiospermae	Fagaceae	LLF	Dothideomycetes (Capnodiales)	Fungi	1	Ascomycota	1	Dothideomycetes	0.9	Capnodiales	0.89	NA	NA	NA	NA	NA	SH238954.06FU	0.87
KX909025	FL1670	ARIZ:FL1670	145	411	FLA	C2	Quercus inopina	Angiospermae	Fagaceae	LLF	N/A	Fungi	1	Ascomycota	1	NA	NA	NA	NA	NA	NA	NA	NA	NA	NA	NA
KU683869	FL1671	ARIZ:FL1671	133	383	FLA	C2	Pinus clausa	Pinophyta	Pinaceae	LLF	Sordariomycetes (Xylariales)	Fungi	1	Ascomycota	1	Sordariomycetes	1	Xylariales	1	NA	NA	NA	NA	NA	SH194577.06FU	1
KU683870	FL1672	ARIZ:FL1672	132	393	FLA	C2	Pinus clausa	Pinophyta	Pinaceae	LLF	Sordariomycetes (Xylariales)	Fungi	1	Ascomycota	1	Sordariomycetes	1	Xylariales	1	NA	NA	NA	NA	NA	SH225513.06FU	1
KX908781	FL1675	ARIZ:FL1675	212	672	FLA	C2	Pinus clausa	Pinophyta	Pinaceae	LLF	Sordariomycetes (N/A)	Fungi	1	Ascomycota	0.93	Sordariomycetes	0.84	Xylariales	0.8	NA	NA	NA	NA	NA	NA	NA
KX908782	FL1676	ARIZ:FL1676	141	693	FLA	C2	Pinus clausa	Pinophyta	Pinaceae	LLF	Leotiomycetes (Rhytismatales)	Fungi	1	Ascomycota	1	Leotiomycetes	1	Rhytismatales	1	Rhytismataceae	1	Lophodermium	1	Lophodermium sp	SH198383.06FU	1
KX908783	FL1677	ARIZ:FL1677	118	706	FLA	C2	Pinus clausa	Pinophyta	Pinaceae	LLF	Dothideomycetes (Pleosporales)	Fungi	1	Ascomycota	1	Dothideomycetes	1	Pleosporales	1	Lophiostomataceae	0.89	Lophiostoma	0.89	Lophiostoma sp	SH235594.06FU	0.89
KX908695	FL1678	ARIZ:FL1678	213	707	FLA	C2	Pinus clausa	Pinophyta	Pinaceae	LLF	Dothideomycetes (Capnodiales)	Fungi	1	Ascomycota	1	Dothideomycetes	1	Capnodiales	0.98	Teratosphaeriaceae	0.97	Teratosphaeria	0.97	Teratosphaeria marasasii	SH238961.06FU	0.97
KX908784	FL1680	ARIZ:FL1680	141	690	FLA	C2	Pinus clausa	Pinophyta	Pinaceae	LLF	Leotiomycetes (Rhytismatales)	Fungi	1	Ascomycota	1	Leotiomycetes	1	Rhytismatales	1	Rhytismataceae	1	Lophodermium	1	Lophodermium sp	SH198383.06FU	1
KU683871	FL1681	ARIZ:FL1681	227	708	FLA	C2	Pinus clausa	Pinophyta	Pinaceae	LLF	Sordariomycetes (Xylariales)	Fungi	1	Ascomycota	1	Sordariomycetes	1	Xylariales	1	Amphisphaeriaceae	1	Pestalotiopsis	1	Pestalotiopsis sp	SH225828.06FU	1
KX908785	FL1682	ARIZ:FL1682	141	400	FLA	C2	Pinus clausa	Pinophyta	Pinaceae	LLF	Leotiomycetes (Rhytismatales)	Fungi	1	Ascomycota	1	Leotiomycetes	1	Rhytismatales	1	Rhytismataceae	1	Lophodermium	1	Lophodermium sp	SH198383.06FU	1
KX908786	FL1684	ARIZ:FL1684	196	576	FLA	C2	Pinus clausa	Pinophyta	Pinaceae	LLF	Dothideomycetes (Pleosporales)	Fungi	1	Ascomycota	1	Dothideomycetes	1	Pleosporales	1	Lophiostomataceae	1	Lophiostoma	1	Lophiostoma sp	SH195481.06FU	1
KX908787	FL1686	ARIZ:FL1686	141	400	FLA	C2	Pinus clausa	Pinophyta	Pinaceae	LLF	Leotiomycetes (Rhytismatales)	Fungi	1	Ascomycota	1	Leotiomycetes	1	Rhytismatales	1	Rhytismataceae	1	Lophodermium	1	Lophodermium sp	SH198383.06FU	1
KX908788	FL1687	ARIZ:FL1687	212	672	FLA	C2	Pinus clausa	Pinophyta	Pinaceae	LLF	N/A	Fungi	1	Ascomycota	0.8	Sordariomycetes	0.84	Xylariales	0.8	NA	NA	NA	NA	NA	NA	NA
KX908789	FL1688	ARIZ:FL1688	141	709	FLA	C2	Pinus clausa	Pinophyta	Pinaceae	LLF	Leotiomycetes (Rhytismatales)	Fungi	1	Ascomycota	1	Leotiomycetes	1	Rhytismatales	1	Rhytismataceae	1	Lophodermium	1	Lophodermium sp	SH198383.06FU	1
KX908790	FL1689	ARIZ:FL1689	212	672	FLA	C2	Pinus clausa	Pinophyta	Pinaceae	LLF	Sordariomycetes (N/A)	Fungi	1	Ascomycota	0.93	Sordariomycetes	0.84	Xylariales	0.8	NA	NA	NA	NA	NA	NA	NA
KU683872	FL1691	ARIZ:FL1691	143	527	FLA	C2	Pinus clausa	Pinophyta	Pinaceae	LLF	Sordariomycetes (Xylariales)	Fungi	1	Ascomycota	1	Sordariomycetes	1	Xylariales	1	Xylariaceae	1	Xylaria	1	Xylaria sp	SH240406.06FU	1
KX908791	FL1692	ARIZ:FL1692	212	672	FLA	C2	Pinus clausa	Pinophyta	Pinaceae	LLF	Sordariomycetes (N/A)	Fungi	1	Ascomycota	0.93	Sordariomycetes	0.84	Xylariales	0.8	NA	NA	NA	NA	NA	NA	NA
KX908792	FL1693	ARIZ:FL1693	228	710	FLA	C2	Pinus clausa	Pinophyta	Pinaceae	LLF	Leotiomycetes (Helotiales)	Fungi	1	Ascomycota	1	Leotiomycetes	0.87	Helotiales	0.86	NA	NA	NA	NA	NA	NA	NA
KX908793	FL1694	ARIZ:FL1694	141	400	FLA	C2	Pinus clausa	Pinophyta	Pinaceae	LLF	Leotiomycetes (Rhytismatales)	Fungi	1	Ascomycota	1	Leotiomycetes	1	Rhytismatales	1	Rhytismataceae	1	Lophodermium	1	Lophodermium sp	SH198383.06FU	1
KX908794	FL1696	ARIZ:FL1696	102	478	FLA	C2	Pinus clausa	Pinophyta	Pinaceae	LLF	Pezizomycetes (N/A)	Fungi	1	Ascomycota	1	Pezizomycetes	1	NA	NA	NA	NA	NA	NA	NA	SH212259.06FU	1
KX908795	FL1697	ARIZ:FL1697	151	421	FLA	C2	Pinus clausa	Pinophyta	Pinaceae	LLF	Sordariomycetes (Sordariales)	Fungi	1	Ascomycota	1	Sordariomycetes	1	Sordariales	1	Chaetomiaceae	1	Chaetomium	1	Chaetomium sp	SH218147.06FU	1
KX908796	FL1699	ARIZ:FL1699	206	668	FLA	C2	Pinus clausa	Pinophyta	Pinaceae	LLF	Dothideomycetes (Pleosporales)	Fungi	1	Ascomycota	1	Dothideomycetes	1	Pleosporales	1	Lophiostomataceae	1	Lophiostoma	1	Lophiostoma fuckelii	SH237048.06FU	1
KX908797	FL1700	ARIZ:FL1700	141	676	FLA	C2	Pinus clausa	Pinophyta	Pinaceae	LLF	Leotiomycetes (Rhytismatales)	Fungi	1	Ascomycota	1	Leotiomycetes	1	Rhytismatales	1	Rhytismataceae	1	Lophodermium	1	Lophodermium sp	SH198383.06FU	1
KX908798	FL1703	ARIZ:FL1703	29	46	FLA	C2	Pinus clausa	Pinophyta	Pinaceae	LLF	Dothideomycetes (Pleosporales)	Fungi	1	Ascomycota	1	Dothideomycetes	1	Pleosporales	1	Pleosporaceae	1	Alternaria	1	Alternaria sp 3 MU 2012	SH224849.06FU	0.93
KX908799	FL1704	ARIZ:FL1704	213	711	FLA	C2	Pinus clausa	Pinophyta	Pinaceae	LLF	Dothideomycetes (Capnodiales)	Fungi	1	Ascomycota	1	Dothideomycetes	1	Capnodiales	1	Teratosphaeriaceae	0.98	Teratosphaeria	0.98	Teratosphaeria marasasii	SH238961.06FU	0.98
KX908936	FL1705	ARIZ:FL1705	154	428	FLA	C3	Pinus elliottii	Pinophyta	Pinaceae	LLF	Dothideomycetes (N/A)	Fungi	1	Ascomycota	1	Dothideomycetes	1	Pleosporales	0.86	Sporormiaceae	0.86	Preussia	0.86	Preussia minima	SH190478.06FU	1
KU683873	FL1706	ARIZ:FL1706	112	385	FLA	C3	Pinus elliottii	Pinophyta	Pinaceae	LLF	Sordariomycetes (Xylariales)	Fungi	1	Ascomycota	1	Sordariomycetes	1	Xylariales	1	Xylariaceae	1	Xylaria	1	Xylaria sp AX114	SH230328.06FU	1
KU683874	FL1707	ARIZ:FL1707	133	383	FLA	C3	Pinus elliottii	Pinophyta	Pinaceae	LLF	Sordariomycetes (Xylariales)	Fungi	1	Ascomycota	1	Sordariomycetes	1	Xylariales	1	NA	NA	NA	NA	NA	SH194577.06FU	1
KX908937	FL1708	ARIZ:FL1708	141	400	FLA	C3	Pinus elliottii	Pinophyta	Pinaceae	LLF	Leotiomycetes (Rhytismatales)	Fungi	1	Ascomycota	1	Leotiomycetes	1	Rhytismatales	1	Rhytismataceae	1	Lophodermium	1	Lophodermium sp	SH198383.06FU	1
KU683875	FL1709	ARIZ:FL1709	132	384	FLA	C3	Pinus elliottii	Pinophyta	Pinaceae	LLF	Sordariomycetes (Xylariales)	Fungi	1	Ascomycota	1	Sordariomycetes	1	Xylariales	1	NA	NA	NA	NA	NA	SH225513.06FU	1
KU683876	FL1710	ARIZ:FL1710	132	381	FLA	C3	Pinus elliottii	Pinophyta	Pinaceae	LLF	Sordariomycetes (Xylariales)	Fungi	1	Ascomycota	1	Sordariomycetes	1	Xylariales	1	NA	NA	NA	NA	NA	SH225513.06FU	1
KU683877	FL1713	ARIZ:FL1713	132	384	FLA	C3	Pinus elliottii	Pinophyta	Pinaceae	LLF	Sordariomycetes (Xylariales)	Fungi	1	Ascomycota	1	Sordariomycetes	1	Xylariales	1	NA	NA	NA	NA	NA	SH225513.06FU	1
KU683878	FL1715	ARIZ:FL1715	91	234	FLA	C3	Pinus elliottii	Pinophyta	Pinaceae	LLF	Sordariomycetes (N/A)	Fungi	1	Ascomycota	1	Sordariomycetes	1	NA	NA	NA	NA	NA	NA	NA	SH227121.06FU	1
KX908938	FL1716	ARIZ:FL1716	219	695	FLA	C3	Pinus elliottii	Pinophyta	Pinaceae	LLF	Leotiomycetes (N/A)	Fungi	1	Ascomycota	1	Leotiomycetes	0.82	NA	NA	NA	NA	NA	NA	NA	NA	NA
KX908939	FL1717	ARIZ:FL1717	229	712	FLA	C3	Pinus elliottii	Pinophyta	Pinaceae	LLF	N/A	Fungi	1	Ascomycota	1	NA	NA	NA	NA	NA	NA	NA	NA	NA	NA	NA
KX908940	FL1720	ARIZ:FL1720	141	400	FLA	C3	Pinus elliottii	Pinophyta	Pinaceae	LLF	Leotiomycetes (Rhytismatales)	Fungi	1	Ascomycota	1	Leotiomycetes	1	Rhytismatales	1	Rhytismataceae	1	Lophodermium	1	Lophodermium sp	SH198383.06FU	1
KX908941	FL1721	ARIZ:FL1721	141	713	FLA	C3	Pinus elliottii	Pinophyta	Pinaceae	LLF	Leotiomycetes (Rhytismatales)	Fungi	1	Ascomycota	1	Leotiomycetes	1	Rhytismatales	1	Rhytismataceae	1	Lophodermium	1	Lophodermium sp	SH198383.06FU	1
KX908942	FL1722	ARIZ:FL1722	228	714	FLA	C3	Pinus elliottii	Pinophyta	Pinaceae	LLF	Leotiomycetes (Helotiales)	Fungi	1	Ascomycota	1	Leotiomycetes	0.84	Helotiales	0.82	NA	NA	NA	NA	NA	NA	NA
KX908943	FL1723	ARIZ:FL1723	229	712	FLA	C3	Pinus elliottii	Pinophyta	Pinaceae	LLF	N/A	Fungi	1	Ascomycota	1	NA	NA	NA	NA	NA	NA	NA	NA	NA	NA	NA
KX908944	FL1724	ARIZ:FL1724	213	711	FLA	C3	Pinus elliottii	Pinophyta	Pinaceae	LLF	Dothideomycetes (Capnodiales)	Fungi	1	Ascomycota	1	Dothideomycetes	1	Capnodiales	1	Teratosphaeriaceae	1	Teratosphaeria	1	Teratosphaeria marasasii	SH238961.06FU	1
KX908945	FL1725	ARIZ:FL1725	141	400	FLA	C3	Pinus elliottii	Pinophyta	Pinaceae	LLF	Leotiomycetes (Rhytismatales)	Fungi	1	Ascomycota	1	Leotiomycetes	1	Rhytismatales	1	Rhytismataceae	1	Lophodermium	1	Lophodermium sp	SH198383.06FU	1
KU683879	FL1727	ARIZ:FL1727	144	404	FLA	C3	Pinus elliottii	Pinophyta	Pinaceae	LLF	Sordariomycetes (N/A)	Fungi	1	Ascomycota	1	Sordariomycetes	1	Xylariales	1	Xylariaceae	1	Xylaria	1	Xylaria sp	SH218636.06FU	1
KX908946	FL1728	ARIZ:FL1728	135	525	FLA	C3	Pinus elliottii	Pinophyta	Pinaceae	LLF	Pezizomycetes (N/A)	Fungi	1	Ascomycota	1	Pezizomycetes	1	Pezizales	1	NA	NA	NA	NA	NA	SH218400.06FU	1
KU683880	FL1729	ARIZ:FL1729	107	715	FLA	C3	Pinus elliottii	Pinophyta	Pinaceae	LLF	Sordariomycetes (N/A)	Fungi	1	Ascomycota	1	Sordariomycetes	1	Xylariales	1	Xylariaceae	1	Xylaria	1	Xylaria sp	SH197605.06FU	1
KX908947	FL1730	ARIZ:FL1730	219	695	FLA	C3	Pinus elliottii	Pinophyta	Pinaceae	LLF	Leotiomycetes (N/A)	Fungi	1	Ascomycota	0.97	Leotiomycetes	0.9	NA	NA	NA	NA	NA	NA	NA	NA	NA
KU683881	FL1731	ARIZ:FL1731	133	383	FLA	C3	Pinus elliottii	Pinophyta	Pinaceae	LLF	Sordariomycetes (Xylariales)	Fungi	1	Ascomycota	1	Sordariomycetes	1	Xylariales	1	NA	NA	NA	NA	NA	SH194577.06FU	1
KX908948	FL1732	ARIZ:FL1732	141	400	FLA	C3	Pinus elliottii	Pinophyta	Pinaceae	LLF	Leotiomycetes (Rhytismatales)	Fungi	1	Ascomycota	1	Leotiomycetes	1	Rhytismatales	1	Rhytismataceae	1	Lophodermium	1	Lophodermium sp	SH198383.06FU	1
KU683882	FL1733	ARIZ:FL1733	133	383	FLA	C3	Serenoa repens	Angiospermae	Arecaceae	LLF	Sordariomycetes (Xylariales)	Fungi	1	Ascomycota	1	Sordariomycetes	1	Xylariales	1	NA	NA	NA	NA	NA	SH194577.06FU	1
KU683883	FL1734	ARIZ:FL1734	162	449	FLA	C3	Serenoa repens	Angiospermae	Arecaceae	LLF	Sordariomycetes (Xylariales)	Fungi	1	Ascomycota	1	Sordariomycetes	1	Xylariales	1	Xylariaceae	1	Xylaria	1	Xylaria sp	SH240406.06FU	1
KX908692	FL1735	ARIZ:FL1735	230	716	FLA	C3	Serenoa repens	Angiospermae	Arecaceae	LLF	N/A	Fungi	1	Ascomycota	0.97	NA	NA	NA	NA	NA	NA	NA	NA	NA	NA	NA
KU683884	FL1736	ARIZ:FL1736	133	383	FLA	C3	Serenoa repens	Angiospermae	Arecaceae	LLF	Sordariomycetes (Xylariales)	Fungi	1	Ascomycota	1	Sordariomycetes	1	Xylariales	1	NA	NA	NA	NA	NA	SH194577.06FU	1
KU683885	FL1738	ARIZ:FL1738	162	597	FLA	C3	Serenoa repens	Angiospermae	Arecaceae	LLF	Sordariomycetes (Xylariales)	Fungi	1	Ascomycota	1	Sordariomycetes	1	Xylariales	1	Xylariaceae	1	Xylaria	1	Xylaria sp	SH240406.06FU	1
KX908693	FL1739	ARIZ:FL1739	231	717	FLA	C3	Serenoa repens	Angiospermae	Arecaceae	LLF	N/A	Fungi	1	NA	NA	NA	NA	NA	NA	NA	NA	NA	NA	NA	NA	NA
KU683886	FL1740	ARIZ:FL1740	163	450	FLA	C3	Serenoa repens	Angiospermae	Arecaceae	LLF	Sordariomycetes (Xylariales)	Fungi	1	Ascomycota	1	Sordariomycetes	1	Xylariales	1	Xylariaceae	1	Muscodor	1	Muscodor yucatanensis	SH227005.06FU	1
KU683887	FL1742	ARIZ:FL1742	163	450	FLA	C3	Serenoa repens	Angiospermae	Arecaceae	LLF	Sordariomycetes (Xylariales)	Fungi	1	Ascomycota	1	Sordariomycetes	1	Xylariales	1	Xylariaceae	1	Muscodor	1	Muscodor yucatanensis	SH227005.06FU	1
KU683888	FL1744	ARIZ:FL1744	167	458	FLA	C3	Serenoa repens	Angiospermae	Arecaceae	LLF	Sordariomycetes (Xylariales)	Fungi	1	Ascomycota	1	Sordariomycetes	1	Xylariales	1	Xylariaceae	1	Muscodor	1	Muscodor sp	SH227004.06FU	1
KU683889	FL1745	ARIZ:FL1745	143	507	FLA	C3	Serenoa repens	Angiospermae	Arecaceae	LLF	Sordariomycetes (Xylariales)	Fungi	1	Ascomycota	1	Sordariomycetes	1	Xylariales	1	Xylariaceae	1	Xylaria	1	Xylaria sp	SH240406.06FU	1
KX908694	FL1746	ARIZ:FL1746	228	718	FLA	C3	Serenoa repens	Angiospermae	Arecaceae	LLF	Leotiomycetes (Helotiales)	Fungi	1	Ascomycota	1	Leotiomycetes	0.88	Helotiales	0.87	NA	NA	NA	NA	NA	NA	NA
KU683890	FL1747	ARIZ:FL1747	107	452	FLA	C3	Serenoa repens	Angiospermae	Arecaceae	LLF	Sordariomycetes (Xylariales)	Fungi	1	Ascomycota	1	Sordariomycetes	1	Xylariales	1	Xylariaceae	1	Xylaria	1	Xylaria sp	SH193306.06FU	1
KU683891	FL1748	ARIZ:FL1748	107	452	FLA	C3	Serenoa repens	Angiospermae	Arecaceae	LLF	Sordariomycetes (Xylariales)	Fungi	1	Ascomycota	1	Sordariomycetes	1	Xylariales	1	Xylariaceae	1	Xylaria	1	Xylaria sp	SH193306.06FU	1
KU683892	FL1749	ARIZ:FL1749	204	611	FLA	C3	Quercus inopina	Angiospermae	Fagaceae	LLF	Sordariomycetes (Xylariales)	Fungi	1	Ascomycota	1	Sordariomycetes	1	Xylariales	0.98	Xylariales unidentified	0.94	Xylariales unidentified 1	0.94	NA	NA	NA
KX909026	FL1750	ARIZ:FL1750	226	705	FLA	C3	Quercus inopina	Angiospermae	Fagaceae	LLF	Dothideomycetes (Capnodiales)	Fungi	1	Ascomycota	1	Dothideomycetes	0.91	Capnodiales	0.9	NA	NA	NA	NA	NA	SH238954.06FU	0.88
KU683893	FL1751	ARIZ:FL1751	162	501	FLA	C3	Quercus inopina	Angiospermae	Fagaceae	LLF	Sordariomycetes (Xylariales)	Fungi	1	Ascomycota	1	Sordariomycetes	1	Xylariales	1	Xylariaceae	1	Xylaria	1	Xylaria sp	SH240406.06FU	1
KX909027	FL1752	ARIZ:FL1752	151	421	FLA	C3	Quercus inopina	Angiospermae	Fagaceae	LLF	Sordariomycetes (Sordariales)	Fungi	1	Ascomycota	1	Sordariomycetes	1	Sordariales	1	Chaetomiaceae	1	Chaetomium	1	Chaetomium sp	SH218147.06FU	1
KX909028	FL1753	ARIZ:FL1753	151	421	FLA	C3	Quercus inopina	Angiospermae	Fagaceae	LLF	Sordariomycetes (Sordariales)	Fungi	1	Ascomycota	1	Sordariomycetes	1	Sordariales	1	Chaetomiaceae	1	Chaetomium	1	Chaetomium sp	SH218147.06FU	1
KU683894	FL1754	ARIZ:FL1754	161	444	FLA	C3	Quercus inopina	Angiospermae	Fagaceae	LLF	Sordariomycetes (Xylariales)	Fungi	1	Ascomycota	1	Sordariomycetes	1	Xylariales	1	Xylariaceae	1	Xylaria	1	Xylaria sp	SH240861.06FU	1
KX909029	FL1755	ARIZ:FL1755	232	719	FLA	C3	Quercus inopina	Angiospermae	Fagaceae	LLF	Sordariomycetes (Chaetosphaeriales)	Fungi	1	Ascomycota	1	Sordariomycetes	0.97	Chaetosphaeriales	0.95	NA	NA	NA	NA	NA	NA	NA
KX909030	FL1756	ARIZ:FL1756	151	421	FLA	C3	Quercus inopina	Angiospermae	Fagaceae	LLF	Sordariomycetes (Sordariales)	Fungi	1	Ascomycota	1	Sordariomycetes	1	Sordariales	1	Chaetomiaceae	1	Chaetomium	1	Chaetomium sp	SH218147.06FU	1
KX909031	FL1758	ARIZ:FL1758	151	421	FLA	C3	Quercus inopina	Angiospermae	Fagaceae	LLF	Sordariomycetes (Sordariales)	Fungi	1	Ascomycota	1	Sordariomycetes	1	Sordariales	1	Chaetomiaceae	1	Chaetomium	1	Chaetomium sp	SH218147.06FU	1
KX909032	FL1759	ARIZ:FL1759	151	421	FLA	C3	Quercus inopina	Angiospermae	Fagaceae	LLF	Sordariomycetes (Sordariales)	Fungi	1	Ascomycota	1	Sordariomycetes	1	Sordariales	1	Chaetomiaceae	1	Chaetomium	1	Chaetomium sp	SH218147.06FU	1
KU683895	FL1760	ARIZ:FL1760	88	422	FLA	C3	Quercus inopina	Angiospermae	Fagaceae	LLF	Sordariomycetes (N/A)	Fungi	1	Ascomycota	1	Sordariomycetes	1	NA	NA	NA	NA	NA	NA	NA	SH205986.06FU	1
KX909033	FL1761	ARIZ:FL1761	96	443	FLA	C3	Quercus inopina	Angiospermae	Fagaceae	LLF	Sordariomycetes (Diaporthales)	Fungi	1	Ascomycota	1	Sordariomycetes	1	Diaporthales	1	Gnomoniaceae	1	Gnomonia	1	Gnomoniopsis paraclavulata	SH129087.06FU	1
KU683896	FL1762	ARIZ:FL1762	176	519	FLA	C3	Quercus inopina	Angiospermae	Fagaceae	LLF	Sordariomycetes (Xylariales)	Fungi	1	Ascomycota	1	Sordariomycetes	1	Xylariales	1	Xylariaceae	1	Nodulisporium	1	Nodulisporium sp	SH225514.06FU	1
KU683897	FL1763	ARIZ:FL1763	178	508	FLA	C3	Quercus inopina	Angiospermae	Fagaceae	LLF	Sordariomycetes (N/A)	Fungi	1	Ascomycota	1	Sordariomycetes	1	NA	NA	NA	NA	NA	NA	NA	SH227009.06FU	0.95
KU683898	FL1764	ARIZ:FL1764	187	599	FLA	C3	Quercus inopina	Angiospermae	Fagaceae	LLF	Sordariomycetes (N/A)	Fungi	1	Ascomycota	1	Sordariomycetes	1	NA	NA	NA	NA	NA	NA	NA	SH239367.06FU	1
KX909034	FL1765	ARIZ:FL1765	233	720	FLA	C3	Quercus inopina	Angiospermae	Fagaceae	LLF	Sordariomycetes (N/A)	Fungi	1	Ascomycota	1	Sordariomycetes	1	NA	NA	NA	NA	NA	NA	NA	SH238016.06FU	1
KX909035	FL1766	ARIZ:FL1766	234	721	FLA	C3	Quercus inopina	Angiospermae	Fagaceae	LLF	Leotiomycetes (Helotiales)	Fungi	1	Ascomycota	1	Leotiomycetes	0.93	Helotiales	0.93	Helotiales unidentified	0.87	Helotiales unidentified 1	0.87	NA	NA	NA
KU683899	FL1767	ARIZ:FL1767	161	444	FLA	C3	Quercus inopina	Angiospermae	Fagaceae	LLF	Sordariomycetes (Xylariales)	Fungi	1	Ascomycota	1	Sordariomycetes	1	Xylariales	1	Xylariaceae	1	Xylaria	1	Xylaria sp	SH240861.06FU	1
KX909036	FL1768	ARIZ:FL1768	226	705	FLA	C3	Quercus inopina	Angiospermae	Fagaceae	LLF	Dothideomycetes (Capnodiales)	Fungi	1	Ascomycota	1	Dothideomycetes	0.9	Capnodiales	0.89	NA	NA	NA	NA	NA	SH238954.06FU	0.87
KU683900	FL1770	ARIZ:FL1770	161	625	FLA	C3	Quercus inopina	Angiospermae	Fagaceae	LLF	Sordariomycetes (Xylariales)	Fungi	1	Ascomycota	1	Sordariomycetes	1	Xylariales	1	Xylariaceae	0.99	Xylaria	0.97	Xylaria sp	SH240868.06FU	0.97
KX909037	FL1771	ARIZ:FL1771	235	722	FLA	C3	Quercus inopina	Angiospermae	Fagaceae	LLF	Leotiomycetes (Rhytismatales)	Fungi	1	Ascomycota	1	Leotiomycetes	0.99	Rhytismatales	0.97	Rhytismataceae	0.96	Coccomyces	0.96	NA	NA	NA
KX909038	FL1772	ARIZ:FL1772	151	421	FLA	C3	Quercus inopina	Angiospermae	Fagaceae	LLF	Sordariomycetes (Sordariales)	Fungi	1	Ascomycota	1	Sordariomycetes	1	Sordariales	1	Chaetomiaceae	1	Chaetomium	1	Chaetomium sp	SH218147.06FU	1
KX909039	FL1773	ARIZ:FL1773	226	705	FLA	C3	Quercus inopina	Angiospermae	Fagaceae	LLF	Dothideomycetes (Capnodiales)	Fungi	1	Ascomycota	1	Dothideomycetes	0.92	Capnodiales	0.91	NA	NA	NA	NA	NA	SH238954.06FU	0.89
KU683901	FL1774	ARIZ:FL1774	178	508	FLA	C3	Quercus inopina	Angiospermae	Fagaceae	LLF	Sordariomycetes (N/A)	Fungi	1	Ascomycota	1	Sordariomycetes	1	NA	NA	NA	NA	NA	NA	NA	SH227009.06FU	0.93
KX909040	FL1775	ARIZ:FL1775	135	723	FLA	C3	Quercus inopina	Angiospermae	Fagaceae	LLF	Pezizomycetes (Pezizales)	Fungi	1	Ascomycota	1	Pezizomycetes	1	Pezizales	1	NA	NA	NA	NA	NA	SH218399.06FU	1
KU683902	FL1776	ARIZ:FL1776	143	582	FLA	C3	Quercus inopina	Angiospermae	Fagaceae	LLF	Sordariomycetes (Xylariales)	Fungi	1	Ascomycota	1	Sordariomycetes	1	Xylariales	1	Xylariaceae	1	Xylaria	1	Xylaria sp	SH240406.06FU	1
KU683903	FL1777	ARIZ:FL1777	236	724	FLA	C3	Quercus inopina	Angiospermae	Fagaceae	LLF	Sordariomycetes (N/A)	Fungi	1	Ascomycota	1	Sordariomycetes	1	NA	NA	NA	NA	NA	NA	NA	NA	NA
KX909041	FL1778	ARIZ:FL1778	226	705	FLA	C3	Quercus inopina	Angiospermae	Fagaceae	LLF	Dothideomycetes (Capnodiales)	Fungi	1	Ascomycota	0.99	Dothideomycetes	0.88	Capnodiales	0.87	NA	NA	NA	NA	NA	SH238954.06FU	0.86
KU683904	FL1779	ARIZ:FL1779	161	444	FLA	C3	Quercus inopina	Angiospermae	Fagaceae	LLF	Sordariomycetes (Xylariales)	Fungi	1	Ascomycota	1	Sordariomycetes	1	Xylariales	1	Xylariaceae	1	Xylaria	1	Xylaria sp	SH240861.06FU	1
KU683905	FL1780	ARIZ:FL1780	237	725	FLA	C3	Quercus inopina	Angiospermae	Fagaceae	LLF	N/A	Fungi	1	Ascomycota	1	NA	NA	NA	NA	NA	NA	NA	NA	NA	NA	NA
KX909042	FL1781	ARIZ:FL1781	151	421	FLA	C3	Quercus inopina	Angiospermae	Fagaceae	LLF	Sordariomycetes (Sordariales)	Fungi	1	Ascomycota	1	Sordariomycetes	1	Sordariales	1	Chaetomiaceae	1	Chaetomium	1	Chaetomium sp	SH218147.06FU	1
KX909043	FL1783	ARIZ:FL1783	238	726	FLA	C3	Quercus inopina	Angiospermae	Fagaceae	LLF	Sordariomycetes (Hypocreales)	Fungi	1	Ascomycota	1	Sordariomycetes	1	Hypocreales	1	Nectriaceae	1	Fusarium	0.82	NA	NA	NA
KU683906	FL1784	ARIZ:FL1784	162	449	FLA	C3	Quercus inopina	Angiospermae	Fagaceae	LLF	Sordariomycetes (Xylariales)	Fungi	1	Ascomycota	1	Sordariomycetes	1	Xylariales	1	Xylariaceae	1	Xylaria	1	Xylaria sp	SH240406.06FU	1
KX908800	FL1786	ARIZ:FL1786	239	727	FLA	C3	Pinus clausa	Pinophyta	Pinaceae	LLF	N/A	Fungi	1	NA	NA	NA	NA	NA	NA	NA	NA	NA	NA	NA	NA	NA
KX908801	FL1787	ARIZ:FL1787	141	400	FLA	C3	Pinus clausa	Pinophyta	Pinaceae	LLF	Leotiomycetes (Rhytismatales)	Fungi	1	Ascomycota	1	Leotiomycetes	1	Rhytismatales	1	Rhytismataceae	1	Lophodermium	1	Lophodermium sp	SH198383.06FU	1
KX908802	FL1788	ARIZ:FL1788	240	728	FLA	C3	Pinus clausa	Pinophyta	Pinaceae	LLF	Sordariomycetes (Hypocreales)	Fungi	1	Ascomycota	1	Sordariomycetes	1	Hypocreales	0.94	NA	NA	NA	NA	NA	NA	NA
KX908803	FL1789	ARIZ:FL1789	141	400	FLA	C3	Pinus clausa	Pinophyta	Pinaceae	LLF	Leotiomycetes (Rhytismatales)	Fungi	1	Ascomycota	1	Leotiomycetes	1	Rhytismatales	1	Rhytismataceae	1	Lophodermium	1	Lophodermium sp	SH198383.06FU	1
KX908804	FL1790	ARIZ:FL1790	241	729	FLA	C3	Pinus clausa	Pinophyta	Pinaceae	LLF	Sordariomycetes (Chaetosphaeriales)	Fungi	1	Ascomycota	1	Sordariomycetes	1	Chaetosphaeriales	1	Chaetosphaeriaceae	1	Dictyochaeta	1	NA	NA	NA
KX908805	FL1791	ARIZ:FL1791	213	711	FLA	C3	Pinus clausa	Pinophyta	Pinaceae	LLF	Dothideomycetes (Capnodiales)	Fungi	1	Ascomycota	1	Dothideomycetes	1	Capnodiales	0.98	Teratosphaeriaceae	0.96	Teratosphaeria	0.96	Teratosphaeria marasasii	SH238961.06FU	0.96
KX908806	FL1792	ARIZ:FL1792	141	402	FLA	C3	Pinus clausa	Pinophyta	Pinaceae	LLF	Leotiomycetes (Rhytismatales)	Fungi	1	Ascomycota	1	Leotiomycetes	1	Rhytismatales	1	Rhytismataceae	1	Lophodermium	1	Lophodermium sp	SH198383.06FU	1
KX908807	FL1794	ARIZ:FL1794	141	400	FLA	C3	Pinus clausa	Pinophyta	Pinaceae	LLF	Leotiomycetes (Rhytismatales)	Fungi	1	Ascomycota	1	Leotiomycetes	1	Rhytismatales	1	Rhytismataceae	1	Lophodermium	1	Lophodermium sp	SH198383.06FU	1
KX908808	FL1797	ARIZ:FL1797	141	730	FLA	C3	Pinus clausa	Pinophyta	Pinaceae	LLF	Leotiomycetes (Rhytismatales)	Fungi	1	Ascomycota	1	Leotiomycetes	1	Rhytismatales	1	Rhytismataceae	1	Lophodermium	1	Lophodermium sp	SH198383.06FU	1
KX908809	FL1798	ARIZ:FL1798	239	727	FLA	C3	Pinus clausa	Pinophyta	Pinaceae	LLF	N/A	Fungi	1	NA	NA	NA	NA	NA	NA	NA	NA	NA	NA	NA	NA	NA
KX908810	FL1800	ARIZ:FL1800	141	688	FLA	C3	Pinus clausa	Pinophyta	Pinaceae	LLF	Leotiomycetes (Rhytismatales)	Fungi	1	Ascomycota	1	Leotiomycetes	1	Rhytismatales	1	Rhytismataceae	1	Lophodermium	1	Lophodermium sp	SH198383.06FU	1
KX908811	FL1801	ARIZ:FL1801	141	731	FLA	C3	Pinus clausa	Pinophyta	Pinaceae	LLF	Leotiomycetes (Rhytismatales)	Fungi	1	Ascomycota	1	Leotiomycetes	1	Rhytismatales	1	Rhytismataceae	1	Lophodermium	1	Lophodermium sp	SH198383.06FU	1
KX908812	FL1802	ARIZ:FL1802	219	695	FLA	C3	Pinus clausa	Pinophyta	Pinaceae	LLF	Leotiomycetes (N/A)	Fungi	1	Ascomycota	1	Leotiomycetes	0.88	NA	NA	NA	NA	NA	NA	NA	NA	NA
KX908813	FL1803	ARIZ:FL1803	141	400	FLA	C3	Pinus clausa	Pinophyta	Pinaceae	LLF	Leotiomycetes (Rhytismatales)	Fungi	1	Ascomycota	1	Leotiomycetes	1	Rhytismatales	1	Rhytismataceae	1	Lophodermium	1	Lophodermium sp	SH198383.06FU	1
KX908814	FL1804	ARIZ:FL1804	240	728	FLA	C3	Pinus clausa	Pinophyta	Pinaceae	LLF	Sordariomycetes (Hypocreales)	Fungi	1	Ascomycota	1	Sordariomycetes	1	Hypocreales	0.86	NA	NA	NA	NA	NA	NA	NA
KX908815	FL1805	ARIZ:FL1805	212	672	FLA	C3	Pinus clausa	Pinophyta	Pinaceae	LLF	Sordariomycetes (Xylariales)	Fungi	1	Ascomycota	0.9	Sordariomycetes	0.88	Xylariales	0.8	NA	NA	NA	NA	NA	NA	NA
KX908816	FL1806	ARIZ:FL1806	215	680	FLA	C3	Pinus clausa	Pinophyta	Pinaceae	LLF	Leotiomycetes (N/A)	Fungi	1	Ascomycota	0.95	Leotiomycetes	0.95	NA	NA	NA	NA	NA	NA	NA	NA	NA
KX908817	FL1807	ARIZ:FL1807	141	400	FLA	C3	Pinus clausa	Pinophyta	Pinaceae	LLF	Leotiomycetes (Rhytismatales)	Fungi	1	Ascomycota	1	Leotiomycetes	1	Rhytismatales	1	Rhytismataceae	1	Lophodermium	1	Lophodermium sp	SH198383.06FU	1
KX908818	FL1808	ARIZ:FL1808	242	732	FLA	C3	Pinus clausa	Pinophyta	Pinaceae	LLF	N/A	Fungi	1	Ascomycota	0.99	NA	NA	NA	NA	NA	NA	NA	NA	NA	NA	NA
KX908819	FL1809	ARIZ:FL1809	219	695	FLA	C3	Pinus clausa	Pinophyta	Pinaceae	LLF	Leotiomycetes (N/A)	Fungi	1	Ascomycota	1	Leotiomycetes	0.91	NA	NA	NA	NA	NA	NA	NA	NA	NA
KX908820	FL1810	ARIZ:FL1810	241	729	FLA	C3	Pinus clausa	Pinophyta	Pinaceae	LLF	Sordariomycetes (Chaetosphaeriales)	Fungi	1	Ascomycota	1	Sordariomycetes	1	Chaetosphaeriales	1	Chaetosphaeriaceae	1	Dictyochaeta	1	NA	NA	NA
KX908821	FL1811	ARIZ:FL1811	243	733	FLA	C3	Pinus clausa	Pinophyta	Pinaceae	LLF	Sordariomycetes (Hypocreales)	Fungi	1	Ascomycota	1	Sordariomycetes	1	Hypocreales	0.96	NA	NA	NA	NA	NA	NA	NA
KX908822	FL1813	ARIZ:FL1813	141	400	FLA	C3	Pinus clausa	Pinophyta	Pinaceae	LLF	Leotiomycetes (Rhytismatales)	Fungi	1	Ascomycota	1	Leotiomycetes	1	Rhytismatales	1	Rhytismataceae	1	Lophodermium	1	Lophodermium sp	SH198383.06FU	1
KX908823	FL1815	ARIZ:FL1815	141	400	FLA	C3	Pinus clausa	Pinophyta	Pinaceae	LLF	Leotiomycetes (Rhytismatales)	Fungi	1	Ascomycota	1	Leotiomycetes	1	Rhytismatales	1	Rhytismataceae	1	Lophodermium	1	Lophodermium sp	SH198383.06FU	1
KX908824	FL1816	ARIZ:FL1816	141	690	FLA	C3	Pinus clausa	Pinophyta	Pinaceae	LLF	Leotiomycetes (Rhytismatales)	Fungi	1	Ascomycota	1	Leotiomycetes	1	Rhytismatales	1	Rhytismataceae	1	Lophodermium	1	Lophodermium sp	SH198383.06FU	1
KX908825	FL1818	ARIZ:FL1818	219	695	FLA	C3	Pinus clausa	Pinophyta	Pinaceae	LLF	Leotiomycetes (N/A)	Fungi	1	Ascomycota	1	Leotiomycetes	0.88	NA	NA	NA	NA	NA	NA	NA	NA	NA
KX908826	FL1819	ARIZ:FL1819	241	729	FLA	C3	Pinus clausa	Pinophyta	Pinaceae	LLF	Sordariomycetes (Chaetosphaeriales)	Fungi	1	Ascomycota	1	Sordariomycetes	1	Chaetosphaeriales	1	Chaetosphaeriaceae	1	Dictyochaeta	1	NA	NA	NA
KX908827	FL1820	ARIZ:FL1820	141	400	FLA	C3	Pinus clausa	Pinophyta	Pinaceae	LLF	Leotiomycetes (Rhytismatales)	Fungi	1	Ascomycota	1	Leotiomycetes	1	Rhytismatales	1	Rhytismataceae	1	Lophodermium	1	Lophodermium sp	SH198383.06FU	1
KX908828	FL1821	ARIZ:FL1821	212	672	FLA	C3	Pinus clausa	Pinophyta	Pinaceae	LLF	Sordariomycetes (N/A)	Fungi	1	Ascomycota	0.85	Sordariomycetes	0.85	Xylariales	0.8	NA	NA	NA	NA	NA	NA	NA
KX908829	FL1822	ARIZ:FL1822	141	671	FLA	C3	Pinus clausa	Pinophyta	Pinaceae	LLF	Leotiomycetes (Rhytismatales)	Fungi	1	Ascomycota	1	Leotiomycetes	1	Rhytismatales	1	Rhytismataceae	1	Lophodermium	1	Lophodermium sp	SH198383.06FU	1
KX908830	FL1824	ARIZ:FL1824	141	455	FLA	C3	Pinus clausa	Pinophyta	Pinaceae	LLF	Leotiomycetes (Rhytismatales)	Fungi	1	Ascomycota	1	Leotiomycetes	1	Rhytismatales	1	Rhytismataceae	1	Lophodermium	1	Lophodermium sp	SH198383.06FU	1
KX908831	FL1825	ARIZ:FL1825	240	728	FLA	C3	Pinus clausa	Pinophyta	Pinaceae	LLF	Sordariomycetes (Hypocreales)	Fungi	1	Ascomycota	1	Sordariomycetes	1	Hypocreales	0.85	NA	NA	NA	NA	NA	NA	NA
KX908614	FL1826	ARIZ:FL1826	244	734	FLA	C1	Serenoa repens	Angiospermae	Arecaceae	DLF	Dothideomycetes (N/A)	Fungi	1	Ascomycota	0.99	Dothideomycetes	0.96	NA	NA	NA	NA	NA	NA	NA	NA	NA
KX908615	FL1827	ARIZ:FL1827	160	735	FLA	C1	Serenoa repens	Angiospermae	Arecaceae	DLF	Dothideomycetes (N/A)	Fungi	1	Ascomycota	1	Dothideomycetes	1	NA	NA	NA	NA	NA	NA	NA	SH241634.06FU	1
KX908616	FL1828	ARIZ:FL1828	211	670	FLA	C1	Serenoa repens	Angiospermae	Arecaceae	DLF	Dothideomycetes (Pleosporales)	Fungi	1	Ascomycota	1	Dothideomycetes	1	Pleosporales	0.99	Cucurbitariaceae	0.99	Curreya	0.99	Curreya austroafricana	SH206678.06FU	0.99
KX908617	FL1831	ARIZ:FL1831	181	537	FLA	C1	Serenoa repens	Angiospermae	Arecaceae	DLF	Dothideomycetes (N/A)	Fungi	1	Ascomycota	1	Dothideomycetes	1	NA	NA	NA	NA	NA	NA	NA	SH238906.06FU	1
KU683907	FL1832	ARIZ:FL1832	161	601	FLA	C1	Serenoa repens	Angiospermae	Arecaceae	DLF	Sordariomycetes (Xylariales)	Fungi	1	Ascomycota	1	Sordariomycetes	1	Xylariales	1	Xylariaceae	0.99	Xylaria	0.93	Xylaria sp	SH193310.06FU	0.93
KX908618	FL1835	ARIZ:FL1835	307	667	FLA	C1	Serenoa repens	Angiospermae	Arecaceae	DLF	Dothideomycetes (N/A)	Fungi	1	Ascomycota	1	Dothideomycetes	1	NA	NA	NA	NA	NA	NA	NA	SH241370.06FU	0.88
KX908619	FL1840	ARIZ:FL1840	193	569	FLA	C1	Serenoa repens	Angiospermae	Arecaceae	DLF	Dothideomycetes (Pleosporales)	Fungi	1	Ascomycota	1	Dothideomycetes	1	Pleosporales	1	Lophiostomataceae	1	Lophiostoma	1	Lophiostoma sp OUCMBI101098	SH195482.06FU	1
KU683908	FL1843	ARIZ:FL1843	162	449	FLA	C1	Serenoa repens	Angiospermae	Arecaceae	DLF	Sordariomycetes (Xylariales)	Fungi	1	Ascomycota	1	Sordariomycetes	1	Xylariales	1	Xylariaceae	1	Xylaria	1	Xylaria sp	SH240406.06FU	1
KU683909	FL1844	ARIZ:FL1844	182	694	FLA	C1	Serenoa repens	Angiospermae	Arecaceae	DLF	Sordariomycetes (Xylariales)	Fungi	1	Ascomycota	1	Sordariomycetes	1	Xylariales	1	Xylariaceae	1	Nodulisporium	1	Nodulisporium sp 17 NK 2011	SH216527.06FU	1
KX908620	FL1847	ARIZ:FL1847	244	734	FLA	C1	Serenoa repens	Angiospermae	Arecaceae	DLF	Dothideomycetes (N/A)	Fungi	1	Ascomycota	0.97	Dothideomycetes	0.86	NA	NA	NA	NA	NA	NA	NA	NA	NA
KU683910	FL1849	ARIZ:FL1849	143	507	FLA	C1	Serenoa repens	Angiospermae	Arecaceae	DLF	Sordariomycetes (Xylariales)	Fungi	1	Ascomycota	1	Sordariomycetes	1	Xylariales	1	Xylariaceae	1	Xylaria	1	Xylaria sp	SH240406.06FU	1
KX908621	FL1850	ARIZ:FL1850	141	400	FLA	C1	Serenoa repens	Angiospermae	Arecaceae	DLF	Leotiomycetes (Rhytismatales)	Fungi	1	Ascomycota	1	Leotiomycetes	1	Rhytismatales	1	Rhytismataceae	1	Lophodermium	1	Lophodermium sp	SH198383.06FU	1
KX908832	FL1853	ARIZ:FL1853	60	736	FLA	C1	Pinus elliottii	Pinophyta	Pinaceae	DLF	Dothideomycetes (N/A)	Fungi	1	Ascomycota	1	Dothideomycetes	1	Pleosporales	0.89	Pleosporaceae	0.88	NA	NA	NA	NA	NA
KU683911	FL1854	ARIZ:FL1854	143	653	FLA	C1	Pinus elliottii	Pinophyta	Pinaceae	DLF	Sordariomycetes (Xylariales)	Fungi	1	Ascomycota	1	Sordariomycetes	1	Xylariales	1	Xylariaceae	1	Xylaria	1	Xylaria sp	SH240406.06FU	1
KX908833	FL1855	ARIZ:FL1855	141	400	FLA	C1	Pinus elliottii	Pinophyta	Pinaceae	DLF	Leotiomycetes (Rhytismatales)	Fungi	1	Ascomycota	1	Leotiomycetes	1	Rhytismatales	1	Rhytismataceae	1	Lophodermium	1	Lophodermium sp	SH198383.06FU	1
KX908834	FL1856	ARIZ:FL1856	214	737	FLA	C1	Pinus elliottii	Pinophyta	Pinaceae	DLF	Dothideomycetes (Pleosporales)	Fungi	1	Ascomycota	1	Dothideomycetes	1	Pleosporales	1	Lophiostomataceae	0.97	Lophiostoma	0.97	Lophiostoma sp	SH235594.06FU	0.97
KU683912	FL1857	ARIZ:FL1857	245	738	FLA	C1	Pinus elliottii	Pinophyta	Pinaceae	DLF	Sordariomycetes (Xylariales)	Fungi	1	Ascomycota	1	Sordariomycetes	1	Xylariales	0.99	Xylariaceae	0.99	Hypoxylon	0.96	Hypoxylon pulicicidum	SH215810.06FU	0.96
KX908835	FL1859	ARIZ:FL1859	141	400	FLA	C1	Pinus elliottii	Pinophyta	Pinaceae	DLF	Leotiomycetes (Rhytismatales)	Fungi	1	Ascomycota	1	Leotiomycetes	1	Rhytismatales	1	Rhytismataceae	1	Lophodermium	1	Lophodermium sp	SH198383.06FU	1
KU683913	FL1860	ARIZ:FL1860	246	739	FLA	C1	Pinus elliottii	Pinophyta	Pinaceae	DLF	Sordariomycetes (Xylariales)	Fungi	1	Ascomycota	1	Sordariomycetes	1	Xylariales	0.97	Xylariaceae	0.96	NA	NA	NA	SH236767.06FU	0.95
KU683914	FL1861	ARIZ:FL1861	136	389	FLA	C1	Pinus elliottii	Pinophyta	Pinaceae	DLF	Sordariomycetes (Xylariales)	Fungi	1	Ascomycota	1	Sordariomycetes	1	Xylariales	1	Xylariaceae	1	Xylaria	1	Xylaria sp F 065,308	SH193313.06FU	1
KX908836	FL1862	ARIZ:FL1862	154	740	FLA	C1	Pinus elliottii	Pinophyta	Pinaceae	DLF	Dothideomycetes (Pleosporales)	Fungi	1	Ascomycota	1	Dothideomycetes	1	Pleosporales	0.83	Sporormiaceae	0.83	Preussia	0.83	Preussia minima	SH190473.06FU	0.83
KX908837	FL1863	ARIZ:FL1863	217	684	FLA	C1	Pinus elliottii	Pinophyta	Pinaceae	DLF	Dothideomycetes (N/A)	Fungi	1	Ascomycota	0.99	Dothideomycetes	0.99	Pleosporales	0.8	NA	NA	NA	NA	NA	NA	NA
KU683915	FL1864	ARIZ:FL1864	132	381	FLA	C1	Pinus elliottii	Pinophyta	Pinaceae	DLF	Sordariomycetes (Xylariales)	Fungi	1	Ascomycota	1	Sordariomycetes	1	Xylariales	1	NA	NA	NA	NA	NA	SH225513.06FU	1
KX908838	FL1865	ARIZ:FL1865	141	400	FLA	C1	Pinus elliottii	Pinophyta	Pinaceae	DLF	Leotiomycetes (Rhytismatales)	Fungi	1	Ascomycota	1	Leotiomycetes	1	Rhytismatales	1	Rhytismataceae	1	Lophodermium	1	Lophodermium sp	SH198383.06FU	1
KU683916	FL1866	ARIZ:FL1866	107	477	FLA	C1	Pinus elliottii	Pinophyta	Pinaceae	DLF	Sordariomycetes (N/A)	Fungi	1	Ascomycota	1	Sordariomycetes	1	Xylariales	1	Xylariaceae	1	Xylaria	1	Xylaria sp	SH197605.06FU	0.99
KX908839	FL1867	ARIZ:FL1867	6	405	FLA	C1	Pinus elliottii	Pinophyta	Pinaceae	DLF	Sordariomycetes (N/A)	Fungi	1	Ascomycota	1	Sordariomycetes	1	Coniochaetales	1	Coniochaetaceae	1	Lecythophora	1	Lecythophora hoffmannii	SH226455.06FU	1
KX908840	FL1868	ARIZ:FL1868	146	412	FLA	C1	Pinus elliottii	Pinophyta	Pinaceae	DLF	Leotiomycetes (Helotiales)	Fungi	1	Ascomycota	0.98	Leotiomycetes	0.94	Helotiales	0.93	NA	NA	NA	NA	NA	NA	NA
KX908841	FL1871	ARIZ:FL1871	213	741	FLA	C1	Pinus elliottii	Pinophyta	Pinaceae	DLF	Dothideomycetes (Capnodiales)	Fungi	1	Ascomycota	1	Dothideomycetes	1	Capnodiales	1	Teratosphaeriaceae	0.99	Teratosphaeria	0.99	Teratosphaeria marasasii	SH238961.06FU	0.99
KX908842	FL1872	ARIZ:FL1872	6	742	FLA	C1	Pinus elliottii	Pinophyta	Pinaceae	DLF	Sordariomycetes (N/A)	Fungi	1	Ascomycota	1	Sordariomycetes	1	Coniochaetales	1	Coniochaetaceae	1	Lecythophora	1	Lecythophora hoffmannii	SH226442.06FU	1
KU683917	FL1873	ARIZ:FL1873	132	486	FLA	C1	Pinus elliottii	Pinophyta	Pinaceae	DLF	Sordariomycetes (Xylariales)	Fungi	1	Ascomycota	1	Sordariomycetes	1	Xylariales	1	NA	NA	NA	NA	NA	SH225513.06FU	1
KX908843	FL1874	ARIZ:FL1874	151	421	FLA	C1	Pinus elliottii	Pinophyta	Pinaceae	DLF	Sordariomycetes (Sordariales)	Fungi	1	Ascomycota	1	Sordariomycetes	1	Sordariales	1	Chaetomiaceae	1	Chaetomium	1	Chaetomium sp	SH218147.06FU	1
KU683918	FL1875	ARIZ:FL1875	247	743	FLA	C1	Pinus elliottii	Pinophyta	Pinaceae	DLF	Sordariomycetes (N/A)	Fungi	1	Ascomycota	0.84	Sordariomycetes	0.82	NA	NA	NA	NA	NA	NA	NA	NA	NA
KX908844	FL1878	ARIZ:FL1878	243	733	FLA	C1	Pinus elliottii	Pinophyta	Pinaceae	DLF	Sordariomycetes (Hypocreales)	Fungi	1	Ascomycota	1	Sordariomycetes	1	Hypocreales	0.97	NA	NA	NA	NA	NA	NA	NA
KU683919	FL1879	ARIZ:FL1879	11	514	FLA	C1	Pinus elliottii	Pinophyta	Pinaceae	DLF	Sordariomycetes (Xylariales)	Fungi	1	Ascomycota	1	Sordariomycetes	1	Xylariales	1	Xylariaceae	1	Daldinia	1	Daldinia sp	SH224037.06FU	1
KX908845	FL1880	ARIZ:FL1880	135	390	FLA	C1	Pinus elliottii	Pinophyta	Pinaceae	DLF	Pezizomycetes (Pezizales)	Fungi	1	Ascomycota	1	Pezizomycetes	1	Pezizales	1	NA	NA	NA	NA	NA	SH218399.06FU	1
KU683920	FL1881	ARIZ:FL1881	200	632	FLA	C1	Pinus elliottii	Pinophyta	Pinaceae	DLF	Sordariomycetes (Xylariales)	Fungi	1	Ascomycota	1	Sordariomycetes	1	Xylariales	0.81	Xylariaceae	0.81	Xylaria	0.81	Xylaria sp	SH201962.06FU	0.81
KX908846	FL1883	ARIZ:FL1883	141	400	FLA	C1	Pinus elliottii	Pinophyta	Pinaceae	DLF	Leotiomycetes (Rhytismatales)	Fungi	1	Ascomycota	1	Leotiomycetes	1	Rhytismatales	1	Rhytismataceae	1	Lophodermium	1	Lophodermium sp	SH198383.06FU	1
KX908847	FL1884	ARIZ:FL1884	214	674	FLA	C1	Pinus elliottii	Pinophyta	Pinaceae	DLF	Dothideomycetes (Pleosporales)	Fungi	1	Ascomycota	1	Dothideomycetes	1	Pleosporales	0.98	Lophiostomataceae	0.97	Lophiostoma	0.97	Lophiostoma sp	SH235594.06FU	0.97
KX908848	FL1885	ARIZ:FL1885	141	402	FLA	C1	Pinus elliottii	Pinophyta	Pinaceae	DLF	Leotiomycetes (Rhytismatales)	Fungi	1	Ascomycota	1	Leotiomycetes	1	Rhytismatales	1	Rhytismataceae	1	Lophodermium	1	Lophodermium sp	SH198383.06FU	1
KX908849	FL1886	ARIZ:FL1886	65	682	FLA	C1	Pinus elliottii	Pinophyta	Pinaceae	DLF	Eurotiomycetes (Eurotiales)	Fungi	1	Ascomycota	1	Eurotiomycetes	1	Eurotiales	1	Trichocomaceae	1	Talaromyces	0.9	Talaromyces flavus	SH225870.06FU	0.9
KU683921	FL1887	ARIZ:FL1887	132	486	FLA	C1	Pinus elliottii	Pinophyta	Pinaceae	DLF	Sordariomycetes (Xylariales)	Fungi	1	Ascomycota	1	Sordariomycetes	1	Xylariales	1	NA	NA	NA	NA	NA	SH225513.06FU	1
KU683922	FL1888	ARIZ:FL1888	134	391	FLA	C1	Pinus elliottii	Pinophyta	Pinaceae	DLF	Sordariomycetes (Xylariales)	Fungi	1	Ascomycota	1	Sordariomycetes	1	Xylariales	1	NA	NA	NA	NA	NA	SH225513.06FU	1
KU683923	FL1889	ARIZ:FL1889	143	507	FLA	C1	Pinus elliottii	Pinophyta	Pinaceae	DLF	Sordariomycetes (Xylariales)	Fungi	1	Ascomycota	1	Sordariomycetes	1	Xylariales	1	Xylariaceae	1	Xylaria	1	Xylaria sp	SH240406.06FU	1
KX908850	FL1890	ARIZ:FL1890	118	685	FLA	C1	Pinus elliottii	Pinophyta	Pinaceae	DLF	Dothideomycetes (Pleosporales)	Fungi	1	Ascomycota	1	Dothideomycetes	1	Pleosporales	1	Lophiostomataceae	0.94	Lophiostoma	0.94	Lophiostoma sp	SH235594.06FU	0.94
KU683924	FL1891	ARIZ:FL1891	162	449	FLA	C1	Pinus elliottii	Pinophyta	Pinaceae	DLF	Sordariomycetes (Xylariales)	Fungi	1	Ascomycota	1	Sordariomycetes	1	Xylariales	1	Xylariaceae	1	Xylaria	1	Xylaria sp	SH240406.06FU	1
KX908851	FL1892	ARIZ:FL1892	141	400	FLA	C1	Pinus elliottii	Pinophyta	Pinaceae	DLF	Leotiomycetes (Rhytismatales)	Fungi	1	Ascomycota	1	Leotiomycetes	1	Rhytismatales	1	Rhytismataceae	1	Lophodermium	1	Lophodermium sp	SH198383.06FU	1
KX908852	FL1893	ARIZ:FL1893	177	590	FLA	C1	Pinus elliottii	Pinophyta	Pinaceae	DLF	Pezizomycetes (Pezizales)	Fungi	1	Ascomycota	1	Pezizomycetes	1	Pezizales	1	NA	NA	NA	NA	NA	SH218399.06FU	1
KU683925	FL1895	ARIZ:FL1895	134	391	FLA	C1	Pinus clausa	Pinophyta	Pinaceae	DLF	Sordariomycetes (Xylariales)	Fungi	1	Ascomycota	1	Sordariomycetes	1	Xylariales	1	NA	NA	NA	NA	NA	SH225513.06FU	1
KX908696	FL1896	ARIZ:FL1896	212	672	FLA	C1	Pinus clausa	Pinophyta	Pinaceae	DLF	Sordariomycetes (N/A)	Fungi	1	Ascomycota	0.84	Sordariomycetes	0.8	Xylariales	0.8	NA	NA	NA	NA	NA	NA	NA
KX908697	FL1898	ARIZ:FL1898	118	685	FLA	C1	Pinus clausa	Pinophyta	Pinaceae	DLF	Dothideomycetes (Pleosporales)	Fungi	1	Ascomycota	1	Dothideomycetes	1	Pleosporales	1	Lophiostomataceae	0.92	Lophiostoma	0.92	Lophiostoma sp	SH235594.06FU	0.92
KX908698	FL1899	ARIZ:FL1899	212	672	FLA	C1	Pinus clausa	Pinophyta	Pinaceae	DLF	Sordariomycetes (N/A)	Fungi	1	Ascomycota	0.89	Sordariomycetes	0.84	Xylariales	0.8	NA	NA	NA	NA	NA	NA	NA
KX908699	FL1900	ARIZ:FL1900	216	683	FLA	C1	Pinus clausa	Pinophyta	Pinaceae	DLF	Sordariomycetes (N/A)	Fungi	1	Ascomycota	0.98	Sordariomycetes	0.96	NA	NA	NA	NA	NA	NA	NA	NA	NA
KU683926	FL1901	ARIZ:FL1901	136	520	FLA	C1	Pinus clausa	Pinophyta	Pinaceae	DLF	Sordariomycetes (Xylariales)	Fungi	1	Ascomycota	1	Sordariomycetes	1	Xylariales	1	Xylariaceae	1	Xylaria	1	Xylaria sp F 065,308	SH193313.06FU	1
KX908700	FL1903	ARIZ:FL1903	212	672	FLA	C1	Pinus clausa	Pinophyta	Pinaceae	DLF	N/A	Fungi	1	Ascomycota	0.89	Sordariomycetes	0.84	Xylariales	0.8	NA	NA	NA	NA	NA	NA	NA
KX908701	FL1904	ARIZ:FL1904	135	397	FLA	C1	Pinus clausa	Pinophyta	Pinaceae	DLF	Pezizomycetes (Pezizales)	Fungi	1	Ascomycota	1	Pezizomycetes	1	Pezizales	1	NA	NA	NA	NA	NA	SH218399.06FU	1
KX908702	FL1905	ARIZ:FL1905	141	671	FLA	C1	Pinus clausa	Pinophyta	Pinaceae	DLF	Leotiomycetes (Rhytismatales)	Fungi	1	Ascomycota	1	Leotiomycetes	1	Rhytismatales	1	Rhytismataceae	1	Lophodermium	1	Lophodermium sp	SH198383.06FU	1
KX908703	FL1906	ARIZ:FL1906	219	695	FLA	C1	Pinus clausa	Pinophyta	Pinaceae	DLF	Leotiomycetes (N/A)	Fungi	1	Ascomycota	0.98	Leotiomycetes	0.91	NA	NA	NA	NA	NA	NA	NA	NA	NA
KX908704	FL1907	ARIZ:FL1907	212	672	FLA	C1	Pinus clausa	Pinophyta	Pinaceae	DLF	N/A	Fungi	1	Ascomycota	0.89	Sordariomycetes	0.84	Xylariales	0.8	NA	NA	NA	NA	NA	NA	NA
KX908705	FL1908	ARIZ:FL1908	135	525	FLA	C1	Pinus clausa	Pinophyta	Pinaceae	DLF	Pezizomycetes (N/A)	Fungi	1	Ascomycota	1	Pezizomycetes	1	Pezizales	1	NA	NA	NA	NA	NA	SH218400.06FU	1
KX908706	FL1909	ARIZ:FL1909	212	672	FLA	C1	Pinus clausa	Pinophyta	Pinaceae	DLF	N/A	Fungi	1	Ascomycota	0.89	Sordariomycetes	0.84	Xylariales	0.8	NA	NA	NA	NA	NA	NA	NA
KX908707	FL1910	ARIZ:FL1910	212	672	FLA	C1	Pinus clausa	Pinophyta	Pinaceae	DLF	Sordariomycetes (N/A)	Fungi	1	Ascomycota	0.95	Sordariomycetes	0.9	Xylariales	0.8	NA	NA	NA	NA	NA	NA	NA
KX908708	FL1912	ARIZ:FL1912	212	672	FLA	C1	Pinus clausa	Pinophyta	Pinaceae	DLF	Sordariomycetes (N/A)	Fungi	1	Ascomycota	0.93	Sordariomycetes	0.84	Xylariales	0.8	NA	NA	NA	NA	NA	NA	NA
KX908709	FL1914	ARIZ:FL1914	118	706	FLA	C1	Pinus clausa	Pinophyta	Pinaceae	DLF	Dothideomycetes (Pleosporales)	Fungi	1	Ascomycota	0.99	Dothideomycetes	0.99	Pleosporales	0.9	Lophiostomataceae	0.88	Lophiostoma	0.88	Lophiostoma sp	SH235594.06FU	0.88
KX908710	FL1915	ARIZ:FL1915	219	695	FLA	C1	Pinus clausa	Pinophyta	Pinaceae	DLF	Leotiomycetes (N/A)	Fungi	1	Ascomycota	1	Leotiomycetes	0.9	NA	NA	NA	NA	NA	NA	NA	NA	NA
KX908711	FL1916	ARIZ:FL1916	212	672	FLA	C1	Pinus clausa	Pinophyta	Pinaceae	DLF	Sordariomycetes (N/A)	Fungi	1	Ascomycota	0.95	Sordariomycetes	0.91	Xylariales	0.8	NA	NA	NA	NA	NA	NA	NA
KX908712	FL1917	ARIZ:FL1917	117	700	FLA	C1	Pinus clausa	Pinophyta	Pinaceae	DLF	Sordariomycetes (Diaporthales)	Fungi	1	Ascomycota	1	Sordariomycetes	1	Diaporthales	1	Gnomoniaceae	1	Gnomonia	1	Gnomoniopsis paraclavulata	SH129087.06FU	1
KX908713	FL1919	ARIZ:FL1919	243	733	FLA	C1	Pinus clausa	Pinophyta	Pinaceae	DLF	Sordariomycetes (Hypocreales)	Fungi	1	Ascomycota	1	Sordariomycetes	1	Hypocreales	0.97	NA	NA	NA	NA	NA	NA	NA
KX908714	FL1920	ARIZ:FL1920	212	672	FLA	C1	Pinus clausa	Pinophyta	Pinaceae	DLF	Sordariomycetes (N/A)	Fungi	1	Ascomycota	0.93	Sordariomycetes	0.84	Xylariales	0.8	NA	NA	NA	NA	NA	NA	NA
KX908715	FL1922	ARIZ:FL1922	219	695	FLA	C1	Pinus clausa	Pinophyta	Pinaceae	DLF	Leotiomycetes (N/A)	Fungi	1	Ascomycota	1	Leotiomycetes	0.91	NA	NA	NA	NA	NA	NA	NA	NA	NA
KX908716	FL1923	ARIZ:FL1923	135	607	FLA	C1	Pinus clausa	Pinophyta	Pinaceae	DLF	Pezizomycetes (Pezizales)	Fungi	1	Ascomycota	1	Pezizomycetes	1	Pezizales	1	NA	NA	NA	NA	NA	SH218399.06FU	1
KU683927	FL1924	ARIZ:FL1924	197	577	FLA	C1	Pinus clausa	Pinophyta	Pinaceae	DLF	Sordariomycetes (N/A)	Fungi	1	Ascomycota	1	Sordariomycetes	1	NA	NA	NA	NA	NA	NA	NA	SH241725.06FU	1
KX908717	FL1926	ARIZ:FL1926	212	672	FLA	C1	Pinus clausa	Pinophyta	Pinaceae	DLF	Sordariomycetes (N/A)	Fungi	1	Ascomycota	0.9	Sordariomycetes	0.85	Xylariales	0.8	NA	NA	NA	NA	NA	NA	NA
KU683928	FL1928	ARIZ:FL1928	143	516	FLA	C1	Pinus clausa	Pinophyta	Pinaceae	DLF	Sordariomycetes (Xylariales)	Fungi	1	Ascomycota	1	Sordariomycetes	1	Xylariales	1	Xylariaceae	1	Xylaria	1	Xylaria sp	SH240406.06FU	1
KX908718	FL1930	ARIZ:FL1930	219	695	FLA	C1	Pinus clausa	Pinophyta	Pinaceae	DLF	Leotiomycetes (N/A)	Fungi	1	Ascomycota	1	Leotiomycetes	0.95	NA	NA	NA	NA	NA	NA	NA	NA	NA
KU683929	FL1931	ARIZ:FL1931	200	583	FLA	C3	Serenoa repens	Angiospermae	Arecaceae	DLF	Sordariomycetes (Xylariales)	Fungi	1	Ascomycota	1	Sordariomycetes	1	Xylariales	1	Xylariaceae	1	Xylaria	1	Xylaria sp	SH201962.06FU	1
KX908622	FL1932	ARIZ:FL1932	226	705	FLA	C1	Serenoa repens	Angiospermae	Arecaceae	DLF	Dothideomycetes (Capnodiales)	Fungi	1	Ascomycota	1	Dothideomycetes	0.91	Capnodiales	0.91	NA	NA	NA	NA	NA	SH238954.06FU	0.9
KX908719	FL1935	ARIZ:FL1935	212	672	FLA	C1	Pinus clausa	Pinophyta	Pinaceae	DLF	Sordariomycetes (N/A)	Fungi	1	Ascomycota	0.92	Sordariomycetes	0.83	Xylariales	0.8	NA	NA	NA	NA	NA	NA	NA
KU683930	FL1936	ARIZ:FL1936	202	744	FLA	C1	Pinus clausa	Pinophyta	Pinaceae	DLF	Sordariomycetes (Xylariales)	Fungi	1	Ascomycota	0.99	Sordariomycetes	0.99	Xylariales	0.99	NA	NA	NA	NA	NA	SH209989.06FU	0.94
KX908720	FL1937	ARIZ:FL1937	212	672	FLA	C1	Pinus clausa	Pinophyta	Pinaceae	DLF	N/A	Fungi	1	Ascomycota	0.89	Sordariomycetes	0.84	Xylariales	0.8	NA	NA	NA	NA	NA	NA	NA
KX908721	FL1938	ARIZ:FL1938	154	428	FLA	C1	Pinus clausa	Pinophyta	Pinaceae	DLF	Dothideomycetes (N/A)	Fungi	1	Ascomycota	1	Dothideomycetes	1	Pleosporales	0.86	Sporormiaceae	0.86	Preussia	0.86	Preussia minima	SH190478.06FU	1
KU683931	FL1940	ARIZ:FL1940	112	382	FLA	C1	Pinus clausa	Pinophyta	Pinaceae	DLF	Sordariomycetes (N/A)	Fungi	1	Ascomycota	1	Sordariomycetes	1	Xylariales	1	Xylariaceae	1	Xylaria	1	Xylaria sp AX114	SH230327.06FU	1
KU683932	FL1941	ARIZ:FL1941	140	396	FLA	C1	Pinus clausa	Pinophyta	Pinaceae	DLF	Sordariomycetes (Xylariales)	Fungi	1	Ascomycota	1	Sordariomycetes	1	Xylariales	1	Xylariaceae	1	Xylaria	1	Xylaria sp	SH223885.06FU	1
KX908722	FL1943	ARIZ:FL1943	219	695	FLA	C1	Pinus clausa	Pinophyta	Pinaceae	DLF	Leotiomycetes (N/A)	Fungi	1	Ascomycota	1	Leotiomycetes	0.9	NA	NA	NA	NA	NA	NA	NA	NA	NA
KX908950	FL1945	ARIZ:FL1945	96	443	FLA	C1	Quercus inopina	Angiospermae	Fagaceae	DLF	Sordariomycetes (Diaporthales)	Fungi	1	Ascomycota	1	Sordariomycetes	1	Diaporthales	1	Gnomoniaceae	1	Gnomonia	1	Gnomoniopsis paraclavulata	SH129087.06FU	1
KX908951	FL1947	ARIZ:FL1947	212	672	FLA	C1	Quercus inopina	Angiospermae	Fagaceae	DLF	Sordariomycetes (N/A)	Fungi	1	Ascomycota	0.87	Sordariomycetes	0.82	Xylariales	0.8	NA	NA	NA	NA	NA	NA	NA
KX908952	FL1949	ARIZ:FL1949	212	672	FLA	C1	Quercus inopina	Angiospermae	Fagaceae	DLF	N/A	Fungi	1	Ascomycota	0.81	Sordariomycetes	0.84	Xylariales	0.8	NA	NA	NA	NA	NA	NA	NA
KX908953	FL1950	ARIZ:FL1950	248	745	FLA	C1	Quercus inopina	Angiospermae	Fagaceae	DLF	Dothideomycetes (N/A)	Fungi	1	Ascomycota	1	Dothideomycetes	1	NA	NA	NA	NA	NA	NA	NA	NA	NA
KX908954	FL1952	ARIZ:FL1952	196	576	FLA	C1	Quercus inopina	Angiospermae	Fagaceae	DLF	Dothideomycetes (Pleosporales)	Fungi	1	Ascomycota	1	Dothideomycetes	1	Pleosporales	1	Lophiostomataceae	1	Lophiostoma	1	Lophiostoma sp	SH195481.06FU	1
KX908955	FL1954	ARIZ:FL1954	228	710	FLA	C1	Quercus inopina	Angiospermae	Fagaceae	DLF	Leotiomycetes (Helotiales)	Fungi	1	Ascomycota	1	Leotiomycetes	0.85	Helotiales	0.82	NA	NA	NA	NA	NA	NA	NA
KX908956	FL1955	ARIZ:FL1955	249	746	FLA	C1	Quercus inopina	Angiospermae	Fagaceae	DLF	Dothideomycetes (N/A)	Fungi	1	Ascomycota	1	Dothideomycetes	1	NA	NA	NA	NA	NA	NA	NA	NA	NA
KX908957	FL1958	ARIZ:FL1958	44	747	FLA	C1	Quercus inopina	Angiospermae	Fagaceae	DLF	Sordariomycetes (Boliniales)	Fungi	1	Ascomycota	1	Sordariomycetes	1	Boliniales	1	Boliniaceae	1	Pseudovalsaria	1	Pseudovalsaria ferruginea	SH227626.06FU	1
KX908958	FL1959	ARIZ:FL1959	226	705	FLA	C1	Quercus inopina	Angiospermae	Fagaceae	DLF	Dothideomycetes (Capnodiales)	Fungi	1	Ascomycota	1	Dothideomycetes	0.84	Capnodiales	0.83	NA	NA	NA	NA	NA	SH238954.06FU	0.82
KU683933	FL1960	ARIZ:FL1960	148	414	FLA	C1	Quercus inopina	Angiospermae	Fagaceae	DLF	Sordariomycetes (N/A)	Fungi	1	Ascomycota	1	Sordariomycetes	1	NA	NA	NA	NA	NA	NA	NA	SH237996.06FU	1
KX908959	FL1961	ARIZ:FL1961	226	705	FLA	C1	Quercus inopina	Angiospermae	Fagaceae	DLF	Dothideomycetes (Capnodiales)	Fungi	1	Ascomycota	1	Dothideomycetes	0.84	Capnodiales	0.84	NA	NA	NA	NA	NA	SH238954.06FU	0.84
KU683934	FL1963	ARIZ:FL1963	178	508	FLA	C1	Quercus inopina	Angiospermae	Fagaceae	DLF	Sordariomycetes (N/A)	Fungi	1	Ascomycota	1	Sordariomycetes	1	NA	NA	NA	NA	NA	NA	NA	SH227009.06FU	0.99
KU683935	FL1964	ARIZ:FL1964	143	507	FLA	C1	Quercus inopina	Angiospermae	Fagaceae	DLF	Sordariomycetes (Xylariales)	Fungi	1	Ascomycota	1	Sordariomycetes	1	Xylariales	1	Xylariaceae	1	Xylaria	1	Xylaria sp	SH240406.06FU	1
KX908960	FL1966	ARIZ:FL1966	155	431	FLA	C1	Quercus inopina	Angiospermae	Fagaceae	DLF	N/A	Fungi	1	Ascomycota	1	NA	NA	NA	NA	NA	NA	NA	NA	NA	SH226441.06FU	0.99
KX908961	FL1970	ARIZ:FL1970	151	421	FLA	C1	Quercus inopina	Angiospermae	Fagaceae	DLF	Sordariomycetes (Sordariales)	Fungi	1	Ascomycota	1	Sordariomycetes	1	Sordariales	1	Chaetomiaceae	1	Chaetomium	1	Chaetomium sp	SH218147.06FU	1
KX908962	FL1971	ARIZ:FL1971	6	401	FLA	C1	Quercus inopina	Angiospermae	Fagaceae	DLF	Sordariomycetes (N/A)	Fungi	1	Ascomycota	1	Sordariomycetes	1	Coniochaetales	1	Coniochaetaceae	1	Lecythophora	1	Lecythophora hoffmannii	SH226442.06FU	1
KX908963	FL1972	ARIZ:FL1972	226	705	FLA	C1	Quercus inopina	Angiospermae	Fagaceae	DLF	Dothideomycetes (Capnodiales)	Fungi	1	Ascomycota	1	Dothideomycetes	0.82	Capnodiales	0.81	NA	NA	NA	NA	NA	SH238954.06FU	0.81
KX908964	FL1974	ARIZ:FL1974	135	387	FLA	C1	Quercus inopina	Angiospermae	Fagaceae	DLF	Pezizomycetes (Pezizales)	Fungi	1	Ascomycota	1	Pezizomycetes	1	Pezizales	1	NA	NA	NA	NA	NA	SH218399.06FU	1
KU683936	FL1976	ARIZ:FL1976	165	453	FLA	C1	Quercus inopina	Angiospermae	Fagaceae	DLF	Sordariomycetes (Xylariales)	Fungi	1	Ascomycota	1	Sordariomycetes	1	Xylariales	1	Xylariaceae	1	Nemania	1	Nemania abortiva	SH240860.06FU	1
KX908965	FL1977	ARIZ:FL1977	228	718	FLA	C1	Quercus inopina	Angiospermae	Fagaceae	DLF	Leotiomycetes (N/A)	Fungi	1	Ascomycota	1	Leotiomycetes	0.84	Helotiales	0.82	NA	NA	NA	NA	NA	NA	NA
KX908966	FL1979	ARIZ:FL1979	226	705	FLA	C1	Quercus inopina	Angiospermae	Fagaceae	DLF	Dothideomycetes (Capnodiales)	Fungi	1	Ascomycota	1	Dothideomycetes	0.92	Capnodiales	0.92	NA	NA	NA	NA	NA	SH238954.06FU	0.91
KX908967	FL1982	ARIZ:FL1982	226	705	FLA	C1	Quercus inopina	Angiospermae	Fagaceae	DLF	N/A	Fungi	1	Ascomycota	1	Dothideomycetes	0.92	Capnodiales	0.92	NA	NA	NA	NA	NA	NA	NA
KU683937	FL1983	ARIZ:FL1983	134	386	FLA	C1	Quercus inopina	Angiospermae	Fagaceae	DLF	Sordariomycetes (Xylariales)	Fungi	1	Ascomycota	1	Sordariomycetes	1	Xylariales	1	NA	NA	NA	NA	NA	SH225513.06FU	1
KX908968	FL1984	ARIZ:FL1984	226	705	FLA	C1	Quercus inopina	Angiospermae	Fagaceae	DLF	Dothideomycetes (Capnodiales)	Fungi	1	Ascomycota	1	Dothideomycetes	0.92	Capnodiales	0.92	NA	NA	NA	NA	NA	SH238954.06FU	0.91
KX908969	FL1985	ARIZ:FL1985	226	705	FLA	C1	Quercus inopina	Angiospermae	Fagaceae	DLF	Dothideomycetes (Capnodiales)	Fungi	1	Ascomycota	1	Dothideomycetes	0.92	Capnodiales	0.91	NA	NA	NA	NA	NA	SH238954.06FU	0.89
KX908970	FL1986	ARIZ:FL1986	154	428	FLA	C1	Quercus inopina	Angiospermae	Fagaceae	DLF	Dothideomycetes (N/A)	Fungi	1	Ascomycota	1	Dothideomycetes	1	Pleosporales	0.86	Sporormiaceae	0.86	Preussia	0.86	Preussia minima	SH190478.06FU	1
KX908853	FL1988	ARIZ:FL1988	141	400	FLA	C2	Pinus elliottii	Pinophyta	Pinaceae	DLF	Leotiomycetes (Rhytismatales)	Fungi	1	Ascomycota	1	Leotiomycetes	1	Rhytismatales	1	Rhytismataceae	1	Lophodermium	1	Lophodermium sp	SH198383.06FU	1
KX908854	FL1990	ARIZ:FL1990	102	478	FLA	C2	Pinus elliottii	Pinophyta	Pinaceae	DLF	Pezizomycetes (N/A)	Fungi	1	Ascomycota	1	Pezizomycetes	1	NA	NA	NA	NA	NA	NA	NA	SH212259.06FU	1
KU683938	FL1992	ARIZ:FL1992	200	583	FLA	C2	Pinus elliottii	Pinophyta	Pinaceae	DLF	Sordariomycetes (Xylariales)	Fungi	1	Ascomycota	1	Sordariomycetes	1	Xylariales	1	Xylariaceae	1	Xylaria	1	Xylaria sp	SH201962.06FU	1
KX908855	FL1993	ARIZ:FL1993	141	689	FLA	C2	Pinus elliottii	Pinophyta	Pinaceae	DLF	Leotiomycetes (Rhytismatales)	Fungi	1	Ascomycota	1	Leotiomycetes	1	Rhytismatales	1	Rhytismataceae	1	Lophodermium	1	Lophodermium sp	SH198383.06FU	1
KX908856	FL1995	ARIZ:FL1995	135	387	FLA	C2	Pinus elliottii	Pinophyta	Pinaceae	DLF	Pezizomycetes (Pezizales)	Fungi	1	Ascomycota	1	Pezizomycetes	1	Pezizales	1	NA	NA	NA	NA	NA	SH218399.06FU	1
KX908857	FL1996	ARIZ:FL1996	141	731	FLA	C2	Pinus elliottii	Pinophyta	Pinaceae	DLF	Leotiomycetes (Rhytismatales)	Fungi	1	Ascomycota	1	Leotiomycetes	1	Rhytismatales	1	Rhytismataceae	1	Lophodermium	1	Lophodermium sp	SH198383.06FU	1
KX908858	FL1997	ARIZ:FL1997	141	400	FLA	C2	Pinus elliottii	Pinophyta	Pinaceae	DLF	Leotiomycetes (Rhytismatales)	Fungi	1	Ascomycota	1	Leotiomycetes	1	Rhytismatales	1	Rhytismataceae	1	Lophodermium	1	Lophodermium sp	SH198383.06FU	1
KX908859	FL1998	ARIZ:FL1998	141	400	FLA	C2	Pinus elliottii	Pinophyta	Pinaceae	DLF	Leotiomycetes (Rhytismatales)	Fungi	1	Ascomycota	1	Leotiomycetes	1	Rhytismatales	1	Rhytismataceae	1	Lophodermium	1	Lophodermium sp	SH198383.06FU	1
KX908860	FL2000	ARIZ:FL2000	141	400	FLA	C2	Pinus elliottii	Pinophyta	Pinaceae	DLF	Leotiomycetes (Rhytismatales)	Fungi	1	Ascomycota	1	Leotiomycetes	1	Rhytismatales	1	Rhytismataceae	1	Lophodermium	1	Lophodermium sp	SH198383.06FU	1
KU683939	FL2001	ARIZ:FL2001	162	449	FLA	C2	Pinus elliottii	Pinophyta	Pinaceae	DLF	Sordariomycetes (Xylariales)	Fungi	1	Ascomycota	1	Sordariomycetes	1	Xylariales	1	Xylariaceae	1	Xylaria	1	Xylaria sp	SH240406.06FU	1
KX908861	FL2002	ARIZ:FL2002	141	400	FLA	C2	Pinus elliottii	Pinophyta	Pinaceae	DLF	Leotiomycetes (Rhytismatales)	Fungi	1	Ascomycota	1	Leotiomycetes	1	Rhytismatales	1	Rhytismataceae	1	Lophodermium	1	Lophodermium sp	SH198383.06FU	1
KX908862	FL2004	ARIZ:FL2004	141	400	FLA	C2	Pinus elliottii	Pinophyta	Pinaceae	DLF	Leotiomycetes (Rhytismatales)	Fungi	1	Ascomycota	1	Leotiomycetes	1	Rhytismatales	1	Rhytismataceae	1	Lophodermium	1	Lophodermium sp	SH198383.06FU	1
KX908863	FL2005	ARIZ:FL2005	141	400	FLA	C2	Pinus elliottii	Pinophyta	Pinaceae	DLF	Leotiomycetes (Rhytismatales)	Fungi	1	Ascomycota	1	Leotiomycetes	1	Rhytismatales	1	Rhytismataceae	1	Lophodermium	1	Lophodermium sp	SH198383.06FU	1
KX908864	FL2006	ARIZ:FL2006	141	688	FLA	C2	Pinus elliottii	Pinophyta	Pinaceae	DLF	Leotiomycetes (Rhytismatales)	Fungi	1	Ascomycota	1	Leotiomycetes	1	Rhytismatales	1	Rhytismataceae	1	Lophodermium	1	Lophodermium sp	SH198383.06FU	1
KX908865	FL2007	ARIZ:FL2007	141	400	FLA	C2	Pinus elliottii	Pinophyta	Pinaceae	DLF	Leotiomycetes (Rhytismatales)	Fungi	1	Ascomycota	1	Leotiomycetes	1	Rhytismatales	1	Rhytismataceae	1	Lophodermium	1	Lophodermium sp	SH198383.06FU	1
KX908866	FL2009	ARIZ:FL2009	141	690	FLA	C2	Pinus elliottii	Pinophyta	Pinaceae	DLF	Leotiomycetes (Rhytismatales)	Fungi	1	Ascomycota	1	Leotiomycetes	1	Rhytismatales	1	Rhytismataceae	1	Lophodermium	1	Lophodermium sp	SH198383.06FU	1
KU683940	FL2011	ARIZ:FL2011	132	381	FLA	C2	Pinus elliottii	Pinophyta	Pinaceae	DLF	Sordariomycetes (Xylariales)	Fungi	1	Ascomycota	1	Sordariomycetes	1	Xylariales	1	NA	NA	NA	NA	NA	SH225513.06FU	1
KX908867	FL2012	ARIZ:FL2012	141	713	FLA	C2	Pinus elliottii	Pinophyta	Pinaceae	DLF	Leotiomycetes (Rhytismatales)	Fungi	1	Ascomycota	1	Leotiomycetes	1	Rhytismatales	1	Rhytismataceae	1	Lophodermium	1	Lophodermium sp	SH198383.06FU	1
KX908868	FL2013	ARIZ:FL2013	141	400	FLA	C2	Pinus elliottii	Pinophyta	Pinaceae	DLF	Leotiomycetes (Rhytismatales)	Fungi	1	Ascomycota	1	Leotiomycetes	1	Rhytismatales	1	Rhytismataceae	1	Lophodermium	1	Lophodermium sp	SH198383.06FU	1
KX908869	FL2014	ARIZ:FL2014	141	400	FLA	C2	Pinus elliottii	Pinophyta	Pinaceae	DLF	Leotiomycetes (Rhytismatales)	Fungi	1	Ascomycota	1	Leotiomycetes	1	Rhytismatales	1	Rhytismataceae	1	Lophodermium	1	Lophodermium sp	SH198383.06FU	1
KX908870	FL2015	ARIZ:FL2015	141	400	FLA	C2	Pinus elliottii	Pinophyta	Pinaceae	DLF	Leotiomycetes (Rhytismatales)	Fungi	1	Ascomycota	1	Leotiomycetes	1	Rhytismatales	1	Rhytismataceae	1	Lophodermium	1	Lophodermium sp	SH198383.06FU	1
KX908871	FL2016	ARIZ:FL2016	141	690	FLA	C2	Pinus elliottii	Pinophyta	Pinaceae	DLF	Leotiomycetes (Rhytismatales)	Fungi	1	Ascomycota	1	Leotiomycetes	1	Rhytismatales	1	Rhytismataceae	1	Lophodermium	1	Lophodermium sp	SH198383.06FU	1
KU683941	FL2018	ARIZ:FL2018	132	381	FLA	C2	Pinus elliottii	Pinophyta	Pinaceae	DLF	Sordariomycetes (Xylariales)	Fungi	1	Ascomycota	1	Sordariomycetes	1	Xylariales	1	NA	NA	NA	NA	NA	SH225513.06FU	1
KU683942	FL2020	ARIZ:FL2020	200	583	FLA	C2	Pinus elliottii	Pinophyta	Pinaceae	DLF	Sordariomycetes (Xylariales)	Fungi	1	Ascomycota	1	Sordariomycetes	1	Xylariales	1	Xylariaceae	1	Xylaria	1	Xylaria sp	SH201962.06FU	1
KX908872	FL2022	ARIZ:FL2022	141	400	FLA	C2	Pinus elliottii	Pinophyta	Pinaceae	DLF	Leotiomycetes (Rhytismatales)	Fungi	1	Ascomycota	1	Leotiomycetes	1	Rhytismatales	1	Rhytismataceae	1	Lophodermium	1	Lophodermium sp	SH198383.06FU	0.98
KX908873	FL2023	ARIZ:FL2023	141	400	FLA	C2	Pinus elliottii	Pinophyta	Pinaceae	DLF	Leotiomycetes (Rhytismatales)	Fungi	1	Ascomycota	1	Leotiomycetes	1	Rhytismatales	1	Rhytismataceae	1	Lophodermium	1	Lophodermium sp	SH198383.06FU	1
KX908874	FL2025	ARIZ:FL2025	141	400	FLA	C2	Pinus elliottii	Pinophyta	Pinaceae	DLF	Leotiomycetes (Rhytismatales)	Fungi	1	Ascomycota	1	Leotiomycetes	1	Rhytismatales	1	Rhytismataceae	1	Lophodermium	1	Lophodermium sp	SH198383.06FU	1
KX908875	FL2026	ARIZ:FL2026	6	405	FLA	C2	Pinus elliottii	Pinophyta	Pinaceae	DLF	Sordariomycetes (N/A)	Fungi	1	Ascomycota	1	Sordariomycetes	1	Coniochaetales	1	Coniochaetaceae	1	Lecythophora	1	Lecythophora hoffmannii	SH226455.06FU	1
KX908876	FL2027	ARIZ:FL2027	141	693	FLA	C2	Pinus elliottii	Pinophyta	Pinaceae	DLF	Leotiomycetes (Rhytismatales)	Fungi	1	Ascomycota	1	Leotiomycetes	1	Rhytismatales	1	Rhytismataceae	1	Lophodermium	1	Lophodermium sp	SH198383.06FU	1
KX908877	FL2028	ARIZ:FL2028	141	400	FLA	C2	Pinus elliottii	Pinophyta	Pinaceae	DLF	Leotiomycetes (Rhytismatales)	Fungi	1	Ascomycota	1	Leotiomycetes	1	Rhytismatales	1	Rhytismataceae	1	Lophodermium	1	Lophodermium sp	SH198383.06FU	1
KX908623	FL2029	ARIZ:FL2029	230	716	FLA	C2	Serenoa repens	Angiospermae	Arecaceae	DLF	N/A	Fungi	1	Ascomycota	0.97	NA	NA	NA	NA	NA	NA	NA	NA	NA	NA	NA
KX908624	FL2030	ARIZ:FL2030	196	576	FLA	C2	Serenoa repens	Angiospermae	Arecaceae	DLF	Dothideomycetes (Pleosporales)	Fungi	1	Ascomycota	1	Dothideomycetes	1	Pleosporales	1	Lophiostomataceae	1	Lophiostoma	1	Lophiostoma sp	SH195481.06FU	1
KX908625	FL2031	ARIZ:FL2031	151	421	FLA	C2	Serenoa repens	Angiospermae	Arecaceae	DLF	Sordariomycetes (Sordariales)	Fungi	1	Ascomycota	1	Sordariomycetes	1	Sordariales	1	Chaetomiaceae	1	Chaetomium	1	Chaetomium sp	SH218147.06FU	1
KU683943	FL2032	ARIZ:FL2032	173	504	FLA	C2	Serenoa repens	Angiospermae	Arecaceae	DLF	Sordariomycetes (Xylariales)	Fungi	1	Ascomycota	1	Sordariomycetes	1	Xylariales	1	NA	NA	NA	NA	NA	SH209989.06FU	1
KX908626	FL2034	ARIZ:FL2034	222	748	FLA	C2	Serenoa repens	Angiospermae	Arecaceae	DLF	Sordariomycetes (Xylariales)	Fungi	1	Ascomycota	1	Sordariomycetes	1	Xylariales	1	Amphisphaeriaceae	1	Pestalotiopsis	0.99	Pestalotiopsis microspora	SH210434.06FU	0.85
KX908627	FL2035	ARIZ:FL2035	193	569	FLA	C2	Serenoa repens	Angiospermae	Arecaceae	DLF	Dothideomycetes (Pleosporales)	Fungi	1	Ascomycota	1	Dothideomycetes	1	Pleosporales	1	Lophiostomataceae	1	Lophiostoma	1	Lophiostoma sp OUCMBI101098	SH195482.06FU	0.99
KX908628	FL2038	ARIZ:FL2038	250	749	FLA	C2	Serenoa repens	Angiospermae	Arecaceae	DLF	Dothideomycetes (N/A)	Fungi	1	Ascomycota	1	Dothideomycetes	1	NA	NA	NA	NA	NA	NA	NA	NA	NA
KX908629	FL2039	ARIZ:FL2039	117	700	FLA	C2	Serenoa repens	Angiospermae	Arecaceae	DLF	Sordariomycetes (Diaporthales)	Fungi	1	Ascomycota	1	Sordariomycetes	1	Diaporthales	1	Gnomoniaceae	1	Gnomonia	1	Gnomoniopsis paraclavulata	SH129087.06FU	1
KX908630	FL2040	ARIZ:FL2040	196	576	FLA	C2	Serenoa repens	Angiospermae	Arecaceae	DLF	Dothideomycetes (Pleosporales)	Fungi	1	Ascomycota	1	Dothideomycetes	1	Pleosporales	1	Lophiostomataceae	1	Lophiostoma	1	Lophiostoma sp	SH195481.06FU	1
KX908631	FL2041	ARIZ:FL2041	307	667	FLA	C2	Serenoa repens	Angiospermae	Arecaceae	DLF	Dothideomycetes (N/A)	Fungi	1	Ascomycota	1	Dothideomycetes	1	NA	NA	NA	NA	NA	NA	NA	NA	NA
KX908632	FL2042	ARIZ:FL2042	135	387	FLA	C2	Serenoa repens	Angiospermae	Arecaceae	DLF	Pezizomycetes (Pezizales)	Fungi	1	Ascomycota	1	Pezizomycetes	1	Pezizales	1	NA	NA	NA	NA	NA	SH218399.06FU	1
KX908633	FL2043	ARIZ:FL2043	251	750	FLA	C2	Serenoa repens	Angiospermae	Arecaceae	DLF	Dothideomycetes (N/A)	Fungi	1	Ascomycota	1	Dothideomycetes	1	NA	NA	NA	NA	NA	NA	NA	SH227298.06FU	1
KU683944	FL2044	ARIZ:FL2044	173	504	FLA	C2	Serenoa repens	Angiospermae	Arecaceae	DLF	Sordariomycetes (Xylariales)	Fungi	1	Ascomycota	1	Sordariomycetes	1	Xylariales	1	NA	NA	NA	NA	NA	SH209989.06FU	1
KX908971	FL2045	ARIZ:FL2045	96	443	FLA	C2	Quercus inopina	Angiospermae	Fagaceae	DLF	Sordariomycetes (Diaporthales)	Fungi	1	Ascomycota	1	Sordariomycetes	1	Diaporthales	1	Gnomoniaceae	1	Gnomonia	1	Gnomoniopsis paraclavulata	SH129087.06FU	1
KU683945	FL2046	ARIZ:FL2046	165	453	FLA	C2	Quercus inopina	Angiospermae	Fagaceae	DLF	Sordariomycetes (Xylariales)	Fungi	1	Ascomycota	1	Sordariomycetes	1	Xylariales	1	Xylariaceae	1	Nemania	1	Nemania abortiva	SH240860.06FU	1
KX908972	FL2048	ARIZ:FL2048	96	443	FLA	C2	Quercus inopina	Angiospermae	Fagaceae	DLF	Sordariomycetes (Diaporthales)	Fungi	1	Ascomycota	1	Sordariomycetes	1	Diaporthales	1	Gnomoniaceae	1	Gnomonia	1	Gnomoniopsis paraclavulata	SH129087.06FU	1
KX908973	FL2049	ARIZ:FL2049	150	419	FLA	C2	Quercus inopina	Angiospermae	Fagaceae	DLF	N/A	Fungi	1	Ascomycota	1	NA	NA	NA	NA	NA	NA	NA	NA	NA	SH215997.06FU	0.86
KX908974	FL2050	ARIZ:FL2050	151	421	FLA	C2	Quercus inopina	Angiospermae	Fagaceae	DLF	Sordariomycetes (Sordariales)	Fungi	1	Ascomycota	1	Sordariomycetes	1	Sordariales	1	Chaetomiaceae	1	Chaetomium	1	Chaetomium sp	SH218147.06FU	1
KX908975	FL2051	ARIZ:FL2051	220	697	FLA	C2	Quercus inopina	Angiospermae	Fagaceae	DLF	Leotiomycetes (Rhytismatales)	Fungi	1	Ascomycota	1	Leotiomycetes	1	Rhytismatales	0.93	Rhytismataceae	0.93	NA	NA	NA	SH240323.06FU	0.92
KX908976	FL2052	ARIZ:FL2052	96	443	FLA	C2	Quercus inopina	Angiospermae	Fagaceae	DLF	Sordariomycetes (Diaporthales)	Fungi	1	Ascomycota	1	Sordariomycetes	1	Diaporthales	1	Gnomoniaceae	1	Gnomonia	1	Gnomoniopsis paraclavulata	SH129087.06FU	1
KX908977	FL2053	ARIZ:FL2053	96	443	FLA	C2	Quercus inopina	Angiospermae	Fagaceae	DLF	Sordariomycetes (Diaporthales)	Fungi	1	Ascomycota	1	Sordariomycetes	1	Diaporthales	1	Gnomoniaceae	1	Gnomonia	1	Gnomoniopsis paraclavulata	SH129087.06FU	1
KX908978	FL2054	ARIZ:FL2054	220	697	FLA	C2	Quercus inopina	Angiospermae	Fagaceae	DLF	Leotiomycetes (Rhytismatales)	Fungi	1	Ascomycota	1	Leotiomycetes	1	Rhytismatales	0.9	Rhytismataceae	0.9	NA	NA	NA	SH240323.06FU	0.86
KX908979	FL2056	ARIZ:FL2056	151	421	FLA	C2	Quercus inopina	Angiospermae	Fagaceae	DLF	Sordariomycetes (Sordariales)	Fungi	1	Ascomycota	1	Sordariomycetes	1	Sordariales	1	Chaetomiaceae	1	Chaetomium	1	Chaetomium sp	SH218147.06FU	1
KX908980	FL2057	ARIZ:FL2057	158	436	FLA	C2	Quercus inopina	Angiospermae	Fagaceae	DLF	Sordariomycetes (Diaporthales)	Fungi	1	Ascomycota	1	Sordariomycetes	1	Diaporthales	1	Incertae sedis 20	1	Tubakia	1	Tubakia seoraksanensis	SH224249.06FU	1
KX908981	FL2059	ARIZ:FL2059	151	421	FLA	C2	Quercus inopina	Angiospermae	Fagaceae	DLF	Sordariomycetes (Sordariales)	Fungi	1	Ascomycota	1	Sordariomycetes	1	Sordariales	1	Chaetomiaceae	1	Chaetomium	1	Chaetomium sp	SH218147.06FU	1
KX908982	FL2060	ARIZ:FL2060	220	697	FLA	C2	Quercus inopina	Angiospermae	Fagaceae	DLF	Leotiomycetes (Rhytismatales)	Fungi	1	Ascomycota	1	Leotiomycetes	1	Rhytismatales	0.94	Rhytismataceae	0.94	NA	NA	NA	SH240323.06FU	0.92
KX908983	FL2061	ARIZ:FL2061	151	421	FLA	C2	Quercus inopina	Angiospermae	Fagaceae	DLF	Sordariomycetes (Sordariales)	Fungi	1	Ascomycota	1	Sordariomycetes	1	Sordariales	1	Chaetomiaceae	1	Chaetomium	1	Chaetomium sp	SH218147.06FU	1
KX908984	FL2062	ARIZ:FL2062	117	751	FLA	C2	Quercus inopina	Angiospermae	Fagaceae	DLF	Sordariomycetes (Diaporthales)	Fungi	1	Ascomycota	1	Sordariomycetes	1	Diaporthales	1	Gnomoniaceae	1	Gnomonia	1	Gnomoniopsis paraclavulata	SH129087.06FU	1
KX908985	FL2064	ARIZ:FL2064	96	443	FLA	C2	Quercus inopina	Angiospermae	Fagaceae	DLF	Sordariomycetes (Diaporthales)	Fungi	1	Ascomycota	1	Sordariomycetes	1	Diaporthales	1	Gnomoniaceae	1	Gnomonia	1	Gnomoniopsis paraclavulata	SH129087.06FU	1
KX908986	FL2065	ARIZ:FL2065	100	752	FLA	C2	Quercus inopina	Angiospermae	Fagaceae	DLF	N/A	Fungi	1	Ascomycota	1	NA	NA	NA	NA	NA	NA	NA	NA	NA	SH224250.06FU	1
KX908987	FL2066	ARIZ:FL2066	194	573	FLA	C2	Quercus inopina	Angiospermae	Fagaceae	DLF	Sordariomycetes (N/A)	Fungi	1	Ascomycota	1	Sordariomycetes	0.92	NA	NA	NA	NA	NA	NA	NA	NA	NA
KX908988	FL2067	ARIZ:FL2067	151	421	FLA	C2	Quercus inopina	Angiospermae	Fagaceae	DLF	Sordariomycetes (Sordariales)	Fungi	1	Ascomycota	1	Sordariomycetes	1	Sordariales	1	Chaetomiaceae	1	Chaetomium	1	Chaetomium sp	SH218147.06FU	1
KX908989	FL2068	ARIZ:FL2068	220	697	FLA	C2	Quercus inopina	Angiospermae	Fagaceae	DLF	Leotiomycetes (Rhytismatales)	Fungi	1	Ascomycota	1	Leotiomycetes	1	Rhytismatales	1	Rhytismataceae	1	NA	NA	NA	SH240323.06FU	0.97
KX908990	FL2072	ARIZ:FL2072	151	421	FLA	C2	Quercus inopina	Angiospermae	Fagaceae	DLF	Sordariomycetes (Sordariales)	Fungi	1	Ascomycota	1	Sordariomycetes	1	Sordariales	1	Chaetomiaceae	1	Chaetomium	1	Chaetomium sp	SH218147.06FU	1
KX908991	FL2073	ARIZ:FL2073	220	702	FLA	C2	Quercus inopina	Angiospermae	Fagaceae	DLF	Leotiomycetes (Rhytismatales)	Fungi	1	Ascomycota	1	Leotiomycetes	1	Rhytismatales	1	Rhytismataceae	1	NA	NA	NA	SH240323.06FU	0.99
KX908992	FL2074	ARIZ:FL2074	234	721	FLA	C2	Quercus inopina	Angiospermae	Fagaceae	DLF	Leotiomycetes (Helotiales)	Fungi	1	Ascomycota	1	Leotiomycetes	0.94	Helotiales	0.94	Helotiales unidentified	0.9	Helotiales unidentified 1	0.9	NA	NA	NA
KX908993	FL2075	ARIZ:FL2075	194	573	FLA	C2	Quercus inopina	Angiospermae	Fagaceae	DLF	Sordariomycetes (N/A)	Fungi	1	Ascomycota	1	Sordariomycetes	0.96	NA	NA	NA	NA	NA	NA	NA	NA	NA
KX908994	FL2076	ARIZ:FL2076	220	697	FLA	C2	Quercus inopina	Angiospermae	Fagaceae	DLF	Leotiomycetes (Rhytismatales)	Fungi	1	Ascomycota	1	Leotiomycetes	1	Rhytismatales	1	Rhytismataceae	1	NA	NA	NA	SH240323.06FU	0.99
KX908995	FL2077	ARIZ:FL2077	151	421	FLA	C2	Quercus inopina	Angiospermae	Fagaceae	DLF	Sordariomycetes (Sordariales)	Fungi	1	Ascomycota	1	Sordariomycetes	1	Sordariales	1	Chaetomiaceae	1	Chaetomium	1	Chaetomium sp	SH218147.06FU	1
KX908996	FL2078	ARIZ:FL2078	151	421	FLA	C2	Quercus inopina	Angiospermae	Fagaceae	DLF	Sordariomycetes (Sordariales)	Fungi	1	Ascomycota	1	Sordariomycetes	1	Sordariales	1	Chaetomiaceae	1	Chaetomium	1	Chaetomium sp	SH218147.06FU	1
KX908997	FL2080	ARIZ:FL2080	151	421	FLA	C2	Quercus inopina	Angiospermae	Fagaceae	DLF	Sordariomycetes (Sordariales)	Fungi	1	Ascomycota	1	Sordariomycetes	1	Sordariales	1	Chaetomiaceae	1	Chaetomium	1	Chaetomium sp	SH218147.06FU	1
KX908998	FL2081	ARIZ:FL2081	117	700	FLA	C2	Quercus inopina	Angiospermae	Fagaceae	DLF	Sordariomycetes (Diaporthales)	Fungi	1	Ascomycota	1	Sordariomycetes	1	Diaporthales	1	Gnomoniaceae	1	Gnomonia	1	Gnomoniopsis paraclavulata	SH129087.06FU	1
KX908999	FL2082	ARIZ:FL2082	194	573	FLA	C2	Quercus inopina	Angiospermae	Fagaceae	DLF	Sordariomycetes (N/A)	Fungi	1	Ascomycota	0.98	Sordariomycetes	0.84	NA	NA	NA	NA	NA	NA	NA	NA	NA
KX909000	FL2084	ARIZ:FL2084	151	421	FLA	C2	Quercus inopina	Angiospermae	Fagaceae	DLF	Sordariomycetes (Sordariales)	Fungi	1	Ascomycota	1	Sordariomycetes	1	Sordariales	1	Chaetomiaceae	1	Chaetomium	1	Chaetomium sp	SH218147.06FU	1
KX909001	FL2085	ARIZ:FL2085	151	421	FLA	C2	Quercus inopina	Angiospermae	Fagaceae	DLF	Sordariomycetes (Sordariales)	Fungi	1	Ascomycota	1	Sordariomycetes	1	Sordariales	1	Chaetomiaceae	1	Chaetomium	1	Chaetomium sp	SH218147.06FU	1
KX909002	FL2086	ARIZ:FL2086	96	443	FLA	C2	Quercus inopina	Angiospermae	Fagaceae	DLF	Sordariomycetes (Diaporthales)	Fungi	1	Ascomycota	1	Sordariomycetes	1	Diaporthales	1	Gnomoniaceae	1	Gnomonia	1	Gnomoniopsis paraclavulata	SH129087.06FU	1
KX909003	FL2088	ARIZ:FL2088	117	753	FLA	C2	Quercus inopina	Angiospermae	Fagaceae	DLF	Sordariomycetes (Diaporthales)	Fungi	1	Ascomycota	1	Sordariomycetes	1	Diaporthales	1	Gnomoniaceae	1	Gnomonia	1	Gnomoniopsis paraclavulata	SH129087.06FU	1
KX909004	FL2089	ARIZ:FL2089	117	700	FLA	C2	Quercus inopina	Angiospermae	Fagaceae	DLF	Sordariomycetes (Diaporthales)	Fungi	1	Ascomycota	1	Sordariomycetes	1	Diaporthales	1	Gnomoniaceae	1	Gnomonia	1	Gnomoniopsis paraclavulata	SH129087.06FU	1
KX909005	FL2091	ARIZ:FL2091	96	443	FLA	C2	Quercus inopina	Angiospermae	Fagaceae	DLF	Sordariomycetes (Diaporthales)	Fungi	1	Ascomycota	1	Sordariomycetes	1	Diaporthales	1	Gnomoniaceae	1	Gnomonia	1	Gnomoniopsis paraclavulata	SH129087.06FU	1
KX909006	FL2092	ARIZ:FL2092	117	700	FLA	C2	Quercus inopina	Angiospermae	Fagaceae	DLF	Sordariomycetes (Diaporthales)	Fungi	1	Ascomycota	1	Sordariomycetes	1	Diaporthales	1	Gnomoniaceae	1	Gnomonia	1	Gnomoniopsis paraclavulata	SH129087.06FU	1
KX908723	FL2093	ARIZ:FL2093	141	455	FLA	C2	Pinus clausa	Pinophyta	Pinaceae	DLF	Leotiomycetes (Rhytismatales)	Fungi	1	Ascomycota	1	Leotiomycetes	1	Rhytismatales	1	Rhytismataceae	1	Lophodermium	1	Lophodermium sp	SH198383.06FU	1
KX908724	FL2094	ARIZ:FL2094	141	730	FLA	C2	Pinus clausa	Pinophyta	Pinaceae	DLF	Leotiomycetes (Rhytismatales)	Fungi	1	Ascomycota	1	Leotiomycetes	1	Rhytismatales	1	Rhytismataceae	1	Lophodermium	1	Lophodermium sp	SH198383.06FU	1
KX908725	FL2095	ARIZ:FL2095	141	690	FLA	C2	Pinus clausa	Pinophyta	Pinaceae	DLF	Leotiomycetes (Rhytismatales)	Fungi	1	Ascomycota	1	Leotiomycetes	1	Rhytismatales	1	Rhytismataceae	1	Lophodermium	1	Lophodermium sp	SH198383.06FU	1
KX908726	FL2097	ARIZ:FL2097	135	387	FLA	C2	Pinus clausa	Pinophyta	Pinaceae	DLF	Pezizomycetes (Pezizales)	Fungi	1	Ascomycota	1	Pezizomycetes	1	Pezizales	1	NA	NA	NA	NA	NA	SH218399.06FU	1
KU683946	FL2098	ARIZ:FL2098	156	459	FLA	C2	Pinus clausa	Pinophyta	Pinaceae	DLF	Sordariomycetes (N/A)	Fungi	1	Ascomycota	1	Sordariomycetes	1	NA	NA	NA	NA	NA	NA	NA	SH229133.06FU	1
KX908727	FL2099	ARIZ:FL2099	135	387	FLA	C2	Pinus clausa	Pinophyta	Pinaceae	DLF	Pezizomycetes (Pezizales)	Fungi	1	Ascomycota	1	Pezizomycetes	1	Pezizales	1	NA	NA	NA	NA	NA	SH218399.06FU	1
KX908728	FL2100	ARIZ:FL2100	141	402	FLA	C2	Pinus clausa	Pinophyta	Pinaceae	DLF	Leotiomycetes (Rhytismatales)	Fungi	1	Ascomycota	1	Leotiomycetes	1	Rhytismatales	1	Rhytismataceae	1	Lophodermium	1	Lophodermium sp	SH198383.06FU	1
KU683947	FL2101	ARIZ:FL2101	133	383	FLA	C2	Pinus clausa	Pinophyta	Pinaceae	DLF	Sordariomycetes (Xylariales)	Fungi	1	Ascomycota	1	Sordariomycetes	1	Xylariales	1	NA	NA	NA	NA	NA	SH194577.06FU	1
KX908729	FL2103	ARIZ:FL2103	141	709	FLA	C2	Pinus clausa	Pinophyta	Pinaceae	DLF	Leotiomycetes (Rhytismatales)	Fungi	1	Ascomycota	1	Leotiomycetes	1	Rhytismatales	1	Rhytismataceae	1	Lophodermium	1	Lophodermium sp	SH198383.06FU	1
KX908730	FL2104	ARIZ:FL2104	141	709	FLA	C2	Pinus clausa	Pinophyta	Pinaceae	DLF	Leotiomycetes (Rhytismatales)	Fungi	1	Ascomycota	1	Leotiomycetes	1	Rhytismatales	1	Rhytismataceae	1	Lophodermium	1	Lophodermium sp	SH198383.06FU	1
KX908731	FL2105	ARIZ:FL2105	135	525	FLA	C2	Pinus clausa	Pinophyta	Pinaceae	DLF	Pezizomycetes (N/A)	Fungi	1	Ascomycota	1	Pezizomycetes	1	Pezizales	1	NA	NA	NA	NA	NA	SH218400.06FU	1
KX908732	FL2106	ARIZ:FL2106	212	672	FLA	C2	Pinus clausa	Pinophyta	Pinaceae	DLF	N/A	Fungi	1	Ascomycota	0.86	Sordariomycetes	0.84	Xylariales	0.8	NA	NA	NA	NA	NA	NA	NA
KU683948	FL2107	ARIZ:FL2107	133	383	FLA	C2	Pinus clausa	Pinophyta	Pinaceae	DLF	Sordariomycetes (Xylariales)	Fungi	1	Ascomycota	1	Sordariomycetes	1	Xylariales	1	NA	NA	NA	NA	NA	SH194577.06FU	1
KX908878	FL2108	ARIZ:FL2108	141	400	FLA	C3	Pinus elliottii	Pinophyta	Pinaceae	DLF	Leotiomycetes (Rhytismatales)	Fungi	1	Ascomycota	1	Leotiomycetes	1	Rhytismatales	1	Rhytismataceae	1	Lophodermium	1	Lophodermium sp	SH198383.06FU	1
KP202993	FL2109	ARIZ:FL2109	128	754	FLA	C3	Pinus elliottii	Pinophyta	Pinaceae	DLF	Eurotiomycetes (N/A)	Fungi	1	Ascomycota	0.98	Eurotiomycetes	0.82	Chaetothyriales	0.83	NA	NA	NA	NA	NA	NA	NA
KX908879	FL2110	ARIZ:FL2110	196	576	FLA	C3	Pinus elliottii	Pinophyta	Pinaceae	DLF	Dothideomycetes (Pleosporales)	Fungi	1	Ascomycota	1	Dothideomycetes	1	Pleosporales	1	Lophiostomataceae	1	Lophiostoma	1	Lophiostoma sp	SH195481.06FU	1
KX908880	FL2111	ARIZ:FL2111	177	497	FLA	C3	Pinus elliottii	Pinophyta	Pinaceae	DLF	Pezizomycetes (Pezizales)	Fungi	1	Ascomycota	1	Pezizomycetes	1	Pezizales	1	NA	NA	NA	NA	NA	SH218399.06FU	1
KX908881	FL2112	ARIZ:FL2112	141	455	FLA	C3	Pinus elliottii	Pinophyta	Pinaceae	DLF	Leotiomycetes (Rhytismatales)	Fungi	1	Ascomycota	1	Leotiomycetes	1	Rhytismatales	1	Rhytismataceae	1	Lophodermium	1	Lophodermium sp	SH198383.06FU	1
KU683949	FL2113	ARIZ:FL2113	132	381	FLA	C3	Pinus elliottii	Pinophyta	Pinaceae	DLF	Sordariomycetes (Xylariales)	Fungi	1	Ascomycota	1	Sordariomycetes	1	Xylariales	1	NA	NA	NA	NA	NA	SH225513.06FU	1
KX908882	FL2115	ARIZ:FL2115	141	402	FLA	C3	Pinus elliottii	Pinophyta	Pinaceae	DLF	Leotiomycetes (Rhytismatales)	Fungi	1	Ascomycota	1	Leotiomycetes	1	Rhytismatales	1	Rhytismataceae	1	Lophodermium	1	Lophodermium sp	SH198383.06FU	1
KX908883	FL2116	ARIZ:FL2116	154	428	FLA	C3	Pinus elliottii	Pinophyta	Pinaceae	DLF	Dothideomycetes (N/A)	Fungi	1	Ascomycota	1	Dothideomycetes	1	Pleosporales	0.86	Sporormiaceae	0.86	Preussia	0.86	Preussia minima	SH190478.06FU	1
KU683950	FL2117	ARIZ:FL2117	132	409	FLA	C3	Pinus elliottii	Pinophyta	Pinaceae	DLF	Sordariomycetes (Xylariales)	Fungi	1	Ascomycota	1	Sordariomycetes	1	Xylariales	1	NA	NA	NA	NA	NA	SH225513.06FU	1
KU683951	FL2118	ARIZ:FL2118	173	504	FLA	C3	Pinus elliottii	Pinophyta	Pinaceae	DLF	Sordariomycetes (Xylariales)	Fungi	1	Ascomycota	1	Sordariomycetes	1	Xylariales	1	NA	NA	NA	NA	NA	SH209989.06FU	1
KU683952	FL2119	ARIZ:FL2119	112	432	FLA	C3	Pinus elliottii	Pinophyta	Pinaceae	DLF	Sordariomycetes (N/A)	Fungi	1	Ascomycota	1	Sordariomycetes	1	Xylariales	1	Xylariaceae	1	Xylaria	1	Xylaria sp AX114	SH230330.06FU	0.9
KX908884	FL2120	ARIZ:FL2120	154	428	FLA	C3	Pinus elliottii	Pinophyta	Pinaceae	DLF	Dothideomycetes (N/A)	Fungi	1	Ascomycota	1	Dothideomycetes	1	Pleosporales	0.86	Sporormiaceae	0.86	Preussia	0.86	Preussia minima	SH190478.06FU	1
KX908885	FL2121	ARIZ:FL2121	252	755	FLA	C3	Pinus elliottii	Pinophyta	Pinaceae	DLF	Sordariomycetes (N/A)	Fungi	1	Ascomycota	1	Sordariomycetes	1	NA	NA	NA	NA	NA	NA	NA	NA	NA
KX908886	FL2122	ARIZ:FL2122	177	497	FLA	C3	Pinus elliottii	Pinophyta	Pinaceae	DLF	Pezizomycetes (Pezizales)	Fungi	1	Ascomycota	1	Pezizomycetes	1	Pezizales	1	NA	NA	NA	NA	NA	SH218399.06FU	1
KX908887	FL2123	ARIZ:FL2123	141	400	FLA	C3	Pinus elliottii	Pinophyta	Pinaceae	DLF	Leotiomycetes (Rhytismatales)	Fungi	1	Ascomycota	1	Leotiomycetes	1	Rhytismatales	1	Rhytismataceae	1	Lophodermium	1	Lophodermium sp	SH198383.06FU	1
KX908888	FL2124	ARIZ:FL2124	212	672	FLA	C3	Pinus elliottii	Pinophyta	Pinaceae	DLF	N/A	Fungi	1	Ascomycota	0.84	Sordariomycetes	0.84	Xylariales	0.8	NA	NA	NA	NA	NA	NA	NA
KX908733	FL2126	ARIZ:FL2126	29	46	FLA	C3	Pinus clausa	Pinophyta	Pinaceae	DLF	Dothideomycetes (Pleosporales)	Fungi	1	Ascomycota	1	Dothideomycetes	1	Pleosporales	1	Pleosporaceae	1	Alternaria	1	Alternaria sp 3 MU 2012	SH224849.06FU	0.89
KX908734	FL2127	ARIZ:FL2127	213	756	FLA	C3	Pinus clausa	Pinophyta	Pinaceae	DLF	Dothideomycetes (Capnodiales)	Fungi	1	Ascomycota	1	Dothideomycetes	1	Capnodiales	1	Teratosphaeriaceae	0.98	Teratosphaeria	0.98	Teratosphaeria marasasii	SH238961.06FU	0.98
KX908735	FL2128	ARIZ:FL2128	212	672	FLA	C3	Pinus clausa	Pinophyta	Pinaceae	DLF	Sordariomycetes (N/A)	Fungi	1	Ascomycota	0.93	Sordariomycetes	0.84	Xylariales	0.8	NA	NA	NA	NA	NA	NA	NA
KX908736	FL2129	ARIZ:FL2129	212	672	FLA	C3	Pinus clausa	Pinophyta	Pinaceae	DLF	Sordariomycetes (N/A)	Fungi	1	Ascomycota	0.93	Sordariomycetes	0.84	Xylariales	0.8	NA	NA	NA	NA	NA	NA	NA
KX908737	FL2130	ARIZ:FL2130	231	717	FLA	C3	Pinus clausa	Pinophyta	Pinaceae	DLF	N/A	Fungi	1	NA	NA	NA	NA	NA	NA	NA	NA	NA	NA	NA	NA	NA
KX908738	FL2131	ARIZ:FL2131	253	757	FLA	C3	Pinus clausa	Pinophyta	Pinaceae	DLF	N/A	Fungi	1	Ascomycota	1	Incertae sedis 14	0.92	Incertae sedis 15	0.92	Incertae sedis 16	0.92	Ochroconis	0.92	Ochroconis calidifluminalis	SH241393.06FU	0.91
KX908739	FL2132	ARIZ:FL2132	213	711	FLA	C3	Pinus clausa	Pinophyta	Pinaceae	DLF	Dothideomycetes (Capnodiales)	Fungi	1	Ascomycota	1	Dothideomycetes	1	Capnodiales	1	Teratosphaeriaceae	1	Teratosphaeria	1	Teratosphaeria marasasii	SH238961.06FU	1
KX908740	FL2133	ARIZ:FL2133	231	717	FLA	C3	Pinus clausa	Pinophyta	Pinaceae	DLF	N/A	Fungi	1	NA	NA	NA	NA	NA	NA	NA	NA	NA	NA	NA	NA	NA
KX908741	FL2134	ARIZ:FL2134	231	758	FLA	C3	Pinus clausa	Pinophyta	Pinaceae	DLF	N/A	Fungi	1	NA	NA	NA	NA	NA	NA	NA	NA	NA	NA	NA	NA	NA
KX908742	FL2135	ARIZ:FL2135	254	759	FLA	C3	Pinus clausa	Pinophyta	Pinaceae	DLF	Eurotiomycetes (N/A)	Fungi	1	Ascomycota	1	Eurotiomycetes	1	NA	NA	NA	NA	NA	NA	NA	NA	NA
KU683953	FL2136	ARIZ:FL2136	173	504	FLA	C3	Pinus clausa	Pinophyta	Pinaceae	DLF	Sordariomycetes (Xylariales)	Fungi	1	Ascomycota	1	Sordariomycetes	1	Xylariales	1	NA	NA	NA	NA	NA	SH209989.06FU	1
KX908743	FL2137	ARIZ:FL2137	213	760	FLA	C3	Pinus clausa	Pinophyta	Pinaceae	DLF	Dothideomycetes (Capnodiales)	Fungi	1	Ascomycota	1	Dothideomycetes	1	Capnodiales	0.91	Teratosphaeriaceae	1	Teratosphaeria	1	Teratosphaeria marasasii	SH238961.06FU	1
KX908744	FL2138	ARIZ:FL2138	231	717	FLA	C3	Pinus clausa	Pinophyta	Pinaceae	DLF	N/A	Fungi	1	NA	NA	NA	NA	NA	NA	NA	NA	NA	NA	NA	NA	NA
KX908745	FL2139	ARIZ:FL2139	231	761	FLA	C3	Pinus clausa	Pinophyta	Pinaceae	DLF	N/A	Fungi	1	NA	NA	NA	NA	NA	NA	NA	NA	NA	NA	NA	NA	NA
KX908746	FL2140	ARIZ:FL2140	154	428	FLA	C3	Pinus clausa	Pinophyta	Pinaceae	DLF	Dothideomycetes (N/A)	Fungi	1	Ascomycota	1	Dothideomycetes	1	Pleosporales	0.86	Sporormiaceae	0.86	Preussia	0.86	Preussia minima	SH190478.06FU	1
KX908747	FL2141	ARIZ:FL2141	215	762	FLA	C3	Pinus clausa	Pinophyta	Pinaceae	DLF	Leotiomycetes (N/A)	Fungi	1	Ascomycota	1	Leotiomycetes	1	NA	NA	NA	NA	NA	NA	NA	NA	NA
KU683954	FL2142	ARIZ:FL2142	148	414	FLA	C3	Pinus clausa	Pinophyta	Pinaceae	DLF	Sordariomycetes (N/A)	Fungi	1	Ascomycota	1	Sordariomycetes	1	NA	NA	NA	NA	NA	NA	NA	SH237996.06FU	1
KX908748	FL2143	ARIZ:FL2143	253	763	FLA	C3	Pinus clausa	Pinophyta	Pinaceae	DLF	N/A	Fungi	1	Ascomycota	1	Incertae sedis 14	0.92	Incertae sedis 15	0.92	Incertae sedis 16	0.92	Ochroconis	0.92	Ochroconis calidifluminalis	SH241393.06FU	0.91
KU683955	FL2144	ARIZ:FL2144	161	444	FLA	C3	Pinus clausa	Pinophyta	Pinaceae	DLF	Sordariomycetes (Xylariales)	Fungi	1	Ascomycota	1	Sordariomycetes	1	Xylariales	1	Xylariaceae	1	Xylaria	1	Xylaria sp	SH240861.06FU	1
KX908749	FL2145	ARIZ:FL2145	215	764	FLA	C3	Pinus clausa	Pinophyta	Pinaceae	DLF	Leotiomycetes (N/A)	Fungi	1	Ascomycota	0.98	Leotiomycetes	0.98	NA	NA	NA	NA	NA	NA	NA	NA	NA
KX908750	FL2146	ARIZ:FL2146	214	674	FLA	C3	Pinus clausa	Pinophyta	Pinaceae	DLF	Dothideomycetes (Pleosporales)	Fungi	1	Ascomycota	1	Dothideomycetes	1	Pleosporales	1	Lophiostomataceae	0.97	Lophiostoma	0.97	Lophiostoma sp	SH235594.06FU	0.97
KU683956	FL2147	ARIZ:FL2147	143	582	FLA	C3	Pinus clausa	Pinophyta	Pinaceae	DLF	Sordariomycetes (Xylariales)	Fungi	1	Ascomycota	1	Sordariomycetes	1	Xylariales	1	Xylariaceae	1	Xylaria	1	Xylaria sp	SH240406.06FU	1
KU683957	FL2148	ARIZ:FL2148	199	580	FLA	C3	Pinus clausa	Pinophyta	Pinaceae	DLF	Sordariomycetes (Xylariales)	Fungi	1	Ascomycota	1	Sordariomycetes	1	Xylariales	1	Xylariaceae	0.8	NA	NA	NA	NA	NA
KX908751	FL2149	ARIZ:FL2149	212	672	FLA	C3	Pinus clausa	Pinophyta	Pinaceae	DLF	Sordariomycetes (N/A)	Fungi	1	Ascomycota	0.9	Sordariomycetes	0.8	Xylariales	0.8	NA	NA	NA	NA	NA	NA	NA
KX908752	FL2151	ARIZ:FL2151	212	672	FLA	C3	Pinus clausa	Pinophyta	Pinaceae	DLF	Sordariomycetes (N/A)	Fungi	1	Ascomycota	0.92	Sordariomycetes	0.84	Xylariales	0.8	NA	NA	NA	NA	NA	NA	NA
KU683958	FL2152	ARIZ:FL2152	247	743	FLA	C3	Pinus clausa	Pinophyta	Pinaceae	DLF	N/A	Fungi	1	Ascomycota	0.84	Sordariomycetes	0.82	NA	NA	NA	NA	NA	NA	NA	NA	NA
KU683959	FL2153	ARIZ:FL2153	161	444	FLA	C3	Quercus inopina	Angiospermae	Fagaceae	DLF	Sordariomycetes (Xylariales)	Fungi	1	Ascomycota	1	Sordariomycetes	1	Xylariales	1	Xylariaceae	1	Xylaria	1	Xylaria sp	SH240861.06FU	1
KX909007	FL2154	ARIZ:FL2154	127	765	FLA	C3	Quercus inopina	Angiospermae	Fagaceae	DLF	Dothideomycetes (Pleosporales)	Fungi	1	Ascomycota	1	Dothideomycetes	1	Pleosporales	1	NA	NA	NA	NA	NA	SH197544.06FU	0.96
KU683960	FL2155	ARIZ:FL2155	173	504	FLA	C3	Quercus inopina	Angiospermae	Fagaceae	DLF	Sordariomycetes (Xylariales)	Fungi	1	Ascomycota	1	Sordariomycetes	1	Xylariales	1	NA	NA	NA	NA	NA	SH209989.06FU	1
KU683961	FL2156	ARIZ:FL2156	173	474	FLA	C3	Quercus inopina	Angiospermae	Fagaceae	DLF	Sordariomycetes (Xylariales)	Fungi	1	Ascomycota	1	Sordariomycetes	1	Xylariales	1	NA	NA	NA	NA	NA	SH209989.06FU	1
KX908634	FL2157	ARIZ:FL2157	151	421	FLA	C3	Serenoa repens	Angiospermae	Arecaceae	DLF	Sordariomycetes (Sordariales)	Fungi	1	Ascomycota	1	Sordariomycetes	1	Sordariales	1	Chaetomiaceae	1	Chaetomium	1	Chaetomium sp	SH218147.06FU	1
KX908635	FL2158	ARIZ:FL2158	150	418	FLA	C3	Serenoa repens	Angiospermae	Arecaceae	DLF	N/A	Fungi	1	Ascomycota	1	NA	NA	NA	NA	NA	NA	NA	NA	NA	SH215997.06FU	0.84
KX908636	FL2159	ARIZ:FL2159	96	443	FLA	C3	Serenoa repens	Angiospermae	Arecaceae	DLF	Sordariomycetes (Diaporthales)	Fungi	1	Ascomycota	1	Sordariomycetes	1	Diaporthales	1	Gnomoniaceae	1	Gnomonia	1	Gnomoniopsis paraclavulata	SH129087.06FU	1
KX908637	FL2160	ARIZ:FL2160	220	697	FLA	C3	Serenoa repens	Angiospermae	Arecaceae	DLF	Leotiomycetes (Rhytismatales)	Fungi	1	Ascomycota	1	Leotiomycetes	1	Rhytismatales	0.98	Rhytismataceae	0.97	NA	NA	NA	SH240323.06FU	0.9
KX908638	FL2161	ARIZ:FL2161	151	421	FLA	C3	Serenoa repens	Angiospermae	Arecaceae	DLF	Sordariomycetes (Sordariales)	Fungi	1	Ascomycota	1	Sordariomycetes	1	Sordariales	1	Chaetomiaceae	1	Chaetomium	1	Chaetomium sp	SH218147.06FU	1
KX908639	FL2162	ARIZ:FL2162	96	443	FLA	C3	Serenoa repens	Angiospermae	Arecaceae	DLF	Sordariomycetes (Diaporthales)	Fungi	1	Ascomycota	1	Sordariomycetes	1	Diaporthales	1	Gnomoniaceae	1	Gnomonia	1	Gnomoniopsis paraclavulata	SH129087.06FU	1
KX908640	FL2163	ARIZ:FL2163	255	766	FLA	C3	Serenoa repens	Angiospermae	Arecaceae	DLF	Dothideomycetes (N/A)	Fungi	1	Ascomycota	1	Dothideomycetes	1	NA	NA	NA	NA	NA	NA	NA	SH227298.06FU	1
KX908641	FL2164	ARIZ:FL2164	96	443	FLA	C3	Serenoa repens	Angiospermae	Arecaceae	DLF	Sordariomycetes (Diaporthales)	Fungi	1	Ascomycota	1	Sordariomycetes	1	Diaporthales	1	Gnomoniaceae	1	Gnomonia	1	Gnomoniopsis paraclavulata	SH129087.06FU	1
KX908642	FL2166	ARIZ:FL2166	234	721	FLA	C3	Serenoa repens	Angiospermae	Arecaceae	DLF	Leotiomycetes (Helotiales)	Fungi	1	Ascomycota	1	Leotiomycetes	0.94	Helotiales	0.94	Helotiales unidentified	0.89	Helotiales unidentified 1	0.89	NA	NA	NA
KX908643	FL2167	ARIZ:FL2167	194	573	FLA	C3	Serenoa repens	Angiospermae	Arecaceae	DLF	Sordariomycetes (N/A)	Fungi	1	Ascomycota	1	Sordariomycetes	0.89	NA	NA	NA	NA	NA	NA	NA	NA	NA
KX908644	FL2168	ARIZ:FL2168	96	443	FLA	C3	Serenoa repens	Angiospermae	Arecaceae	DLF	Sordariomycetes (Diaporthales)	Fungi	1	Ascomycota	1	Sordariomycetes	1	Diaporthales	1	Gnomoniaceae	1	Gnomonia	1	Gnomoniopsis paraclavulata	SH129087.06FU	1
KX908645	FL2169	ARIZ:FL2169	151	421	FLA	C3	Serenoa repens	Angiospermae	Arecaceae	DLF	Sordariomycetes (Sordariales)	Fungi	1	Ascomycota	1	Sordariomycetes	1	Sordariales	1	Chaetomiaceae	1	Chaetomium	1	Chaetomium sp	SH218147.06FU	1
KX908646	FL2170	ARIZ:FL2170	96	443	FLA	C3	Serenoa repens	Angiospermae	Arecaceae	DLF	Sordariomycetes (Diaporthales)	Fungi	1	Ascomycota	1	Sordariomycetes	1	Diaporthales	1	Gnomoniaceae	1	Gnomonia	1	Gnomoniopsis paraclavulata	SH129087.06FU	1
KX908647	FL2171	ARIZ:FL2171	96	443	FLA	C3	Serenoa repens	Angiospermae	Arecaceae	DLF	Sordariomycetes (Diaporthales)	Fungi	1	Ascomycota	1	Sordariomycetes	1	Diaporthales	1	Gnomoniaceae	1	Gnomonia	1	Gnomoniopsis paraclavulata	SH129087.06FU	1
KX908648	FL2174	ARIZ:FL2174	96	443	FLA	C3	Serenoa repens	Angiospermae	Arecaceae	DLF	Sordariomycetes (Diaporthales)	Fungi	1	Ascomycota	1	Sordariomycetes	1	Diaporthales	1	Gnomoniaceae	1	Gnomonia	1	Gnomoniopsis paraclavulata	SH129087.06FU	1
KX908649	FL2175	ARIZ:FL2175	256	767	FLA	C3	Serenoa repens	Angiospermae	Arecaceae	DLF	Leotiomycetes (N/A)	Fungi	1	Ascomycota	0.87	Leotiomycetes	0.87	NA	NA	NA	NA	NA	NA	NA	NA	NA
KX908650	FL2176	ARIZ:FL2176	151	421	FLA	C3	Serenoa repens	Angiospermae	Arecaceae	DLF	Sordariomycetes (Sordariales)	Fungi	1	Ascomycota	1	Sordariomycetes	1	Sordariales	1	Chaetomiaceae	1	Chaetomium	1	Chaetomium sp	SH218147.06FU	1
KX908651	FL2177	ARIZ:FL2177	234	768	FLA	C3	Serenoa repens	Angiospermae	Arecaceae	DLF	Leotiomycetes (Helotiales)	Fungi	1	Ascomycota	1	Leotiomycetes	0.98	Helotiales	0.98	Helotiales unidentified	0.94	Helotiales unidentified 1	0.94	NA	NA	NA
KX908652	FL2179	ARIZ:FL2179	222	769	FLA	C3	Serenoa repens	Angiospermae	Arecaceae	DLF	Sordariomycetes (Xylariales)	Fungi	1	Ascomycota	1	Sordariomycetes	1	Xylariales	1	Amphisphaeriaceae	1	Pestalotiopsis	1	Pestalotiopsis microspora	SH210434.06FU	0.94
KX908653	FL2180	ARIZ:FL2180	257	770	FLA	C3	Serenoa repens	Angiospermae	Arecaceae	DLF	Dothideomycetes (Pleosporales)	Fungi	1	Ascomycota	0.99	Dothideomycetes	0.98	Pleosporales	0.89	NA	NA	NA	NA	NA	SH241497.06FU	0.8
KX908654	FL2182	ARIZ:FL2182	258	771	FLA	C3	Serenoa repens	Angiospermae	Arecaceae	DLF	N/A	Fungi	1	Ascomycota	1	NA	NA	NA	NA	NA	NA	NA	NA	NA	NA	NA
KX908655	FL2183	ARIZ:FL2183	169	465	FLA	C3	Serenoa repens	Angiospermae	Arecaceae	DLF	Dothideomycetes (N/A)	Fungi	1	Ascomycota	1	Dothideomycetes	1	NA	NA	NA	NA	NA	NA	NA	SH222846.06FU	1
KX908656	FL2184	ARIZ:FL2184	169	465	FLA	C3	Serenoa repens	Angiospermae	Arecaceae	DLF	Dothideomycetes (N/A)	Fungi	1	Ascomycota	1	Dothideomycetes	1	NA	NA	NA	NA	NA	NA	NA	SH222846.06FU	1
KX908657	FL2185	ARIZ:FL2185	169	465	FLA	C3	Serenoa repens	Angiospermae	Arecaceae	DLF	Dothideomycetes (N/A)	Fungi	1	Ascomycota	1	Dothideomycetes	1	NA	NA	NA	NA	NA	NA	NA	SH222846.06FU	1
KX908658	FL2186	ARIZ:FL2186	169	465	FLA	C3	Serenoa repens	Angiospermae	Arecaceae	DLF	Dothideomycetes (N/A)	Fungi	1	Ascomycota	1	Dothideomycetes	1	NA	NA	NA	NA	NA	NA	NA	SH222846.06FU	1
KX908659	FL2187	ARIZ:FL2187	169	465	FLA	C3	Serenoa repens	Angiospermae	Arecaceae	DLF	Dothideomycetes (N/A)	Fungi	1	Ascomycota	1	Dothideomycetes	1	NA	NA	NA	NA	NA	NA	NA	SH222846.06FU	1
KX908660	FL2190	ARIZ:FL2190	169	463	FLA	C3	Serenoa repens	Angiospermae	Arecaceae	DLF	Dothideomycetes (N/A)	Fungi	1	Ascomycota	1	Dothideomycetes	1	NA	NA	NA	NA	NA	NA	NA	SH222846.06FU	1
KU683962	FL2191	ARIZ:FL2191	144	499	FLA	C3	Serenoa repens	Angiospermae	Arecaceae	DLF	Sordariomycetes (Xylariales)	Fungi	1	Ascomycota	1	Sordariomycetes	1	Xylariales	1	Xylariaceae	1	Xylaria	1	Xylaria sp	SH240406.06FU	1
JQ761057	NC0001	ARIZ:NC0001	259	772	NCH	C1	Quercus montana	Angiospermae	Fagaceae	Endophyte	Sordariomycetes (Diaporthales)	Fungi	1	Ascomycota	1	Sordariomycetes	1	Diaporthales	1	Incertae sedis 20	1	Tubakia	1	Tubakia seoraksanensis	SH224249.06FU	1
JQ761058	NC0002	ARIZ:NC0002	259	772	NCH	C1	Quercus montana	Angiospermae	Fagaceae	Endophyte	Sordariomycetes (Diaporthales)	Fungi	1	Ascomycota	1	Sordariomycetes	1	Diaporthales	1	Incertae sedis 20	1	Tubakia	1	Tubakia seoraksanensis	SH224249.06FU	1
JQ761059	NC0003	ARIZ:NC0003	158	773	NCH	C1	Quercus montana	Angiospermae	Fagaceae	Endophyte	Sordariomycetes (Diaporthales)	Fungi	1	Ascomycota	1	Sordariomycetes	1	Diaporthales	1	Incertae sedis 20	1	Tubakia	1	Tubakia seoraksanensis	SH224249.06FU	1
JQ761060	NC0004	ARIZ:NC0004	158	773	NCH	C1	Quercus montana	Angiospermae	Fagaceae	Endophyte	Sordariomycetes (Diaporthales)	Fungi	1	Ascomycota	1	Sordariomycetes	1	Diaporthales	1	Incertae sedis 20	1	Tubakia	1	Tubakia seoraksanensis	SH224249.06FU	1
JQ761061	NC0005	ARIZ:NC0005	158	773	NCH	C1	Quercus montana	Angiospermae	Fagaceae	Endophyte	Sordariomycetes (Diaporthales)	Fungi	1	Ascomycota	1	Sordariomycetes	1	Diaporthales	1	Incertae sedis 20	1	Tubakia	1	Tubakia seoraksanensis	SH224249.06FU	1
JQ761062	NC0006	ARIZ:NC0006	158	773	NCH	C1	Quercus montana	Angiospermae	Fagaceae	Endophyte	Sordariomycetes (Diaporthales)	Fungi	1	Ascomycota	1	Sordariomycetes	1	Diaporthales	1	Incertae sedis 20	1	Tubakia	1	Tubakia seoraksanensis	SH224249.06FU	1
JQ761063	NC0007	ARIZ:NC0007	260	774	NCH	C1	Quercus montana	Angiospermae	Fagaceae	Endophyte	Leotiomycetes (Helotiales)	Fungi	1	Ascomycota	1	Leotiomycetes	1	Helotiales	1	Incertae sedis 2	1	Hyalodendriella	1	Hyalodendriella sp	SH196241.06FU	1
JQ761064	NC0008	ARIZ:NC0008	158	773	NCH	C1	Quercus montana	Angiospermae	Fagaceae	Endophyte	Sordariomycetes (Diaporthales)	Fungi	1	Ascomycota	1	Sordariomycetes	1	Diaporthales	1	Incertae sedis 20	1	Tubakia	1	Tubakia seoraksanensis	SH224249.06FU	1
JQ761065	NC0009	ARIZ:NC0009	158	775	NCH	C1	Quercus montana	Angiospermae	Fagaceae	Endophyte	Sordariomycetes (Diaporthales)	Fungi	1	Ascomycota	1	Sordariomycetes	1	Diaporthales	1	Incertae sedis 20	1	Tubakia	1	Tubakia seoraksanensis	SH224249.06FU	1
JQ761066	NC0010	ARIZ:NC0010	259	772	NCH	C1	Quercus montana	Angiospermae	Fagaceae	Endophyte	Sordariomycetes (Diaporthales)	Fungi	1	Ascomycota	1	Sordariomycetes	1	Diaporthales	1	Incertae sedis 20	1	Tubakia	1	Tubakia seoraksanensis	SH224249.06FU	1
JQ761067	NC0011	ARIZ:NC0011	259	772	NCH	C1	Quercus montana	Angiospermae	Fagaceae	Endophyte	Sordariomycetes (Diaporthales)	Fungi	1	Ascomycota	1	Sordariomycetes	1	Diaporthales	1	Incertae sedis 20	1	Tubakia	1	Tubakia seoraksanensis	SH224249.06FU	1
JQ761068	NC0012	ARIZ:NC0012	259	772	NCH	C1	Quercus montana	Angiospermae	Fagaceae	Endophyte	Sordariomycetes (Diaporthales)	Fungi	1	Ascomycota	1	Sordariomycetes	1	Diaporthales	1	Incertae sedis 20	1	Tubakia	1	Tubakia seoraksanensis	SH224249.06FU	1
JQ761069	NC0013	ARIZ:NC0013	259	772	NCH	C1	Quercus montana	Angiospermae	Fagaceae	Endophyte	Sordariomycetes (Diaporthales)	Fungi	1	Ascomycota	1	Sordariomycetes	1	Diaporthales	1	Incertae sedis 20	1	Tubakia	1	Tubakia seoraksanensis	SH224249.06FU	1
JQ761070	NC0014	ARIZ:NC0014	158	773	NCH	C1	Quercus montana	Angiospermae	Fagaceae	Endophyte	Sordariomycetes (Diaporthales)	Fungi	1	Ascomycota	1	Sordariomycetes	1	Diaporthales	1	Incertae sedis 20	1	Tubakia	1	Tubakia seoraksanensis	SH224249.06FU	1
JQ761071	NC0015	ARIZ:NC0015	259	772	NCH	C1	Quercus montana	Angiospermae	Fagaceae	Endophyte	Sordariomycetes (Diaporthales)	Fungi	1	Ascomycota	1	Sordariomycetes	1	Diaporthales	1	Incertae sedis 20	1	Tubakia	1	Tubakia seoraksanensis	SH224249.06FU	1
JQ761072	NC0016	ARIZ:NC0016	158	773	NCH	C1	Quercus montana	Angiospermae	Fagaceae	Endophyte	Sordariomycetes (Diaporthales)	Fungi	1	Ascomycota	1	Sordariomycetes	1	Diaporthales	1	Incertae sedis 20	1	Tubakia	1	Tubakia seoraksanensis	SH224249.06FU	1
JQ761073	NC0017	ARIZ:NC0017	158	776	NCH	C1	Quercus montana	Angiospermae	Fagaceae	Endophyte	Sordariomycetes (Diaporthales)	Fungi	1	Ascomycota	1	Sordariomycetes	1	Diaporthales	1	Incertae sedis 20	1	Tubakia	1	Tubakia seoraksanensis	SH224249.06FU	1
JQ761074	NC0018	ARIZ:NC0018	158	773	NCH	C1	Quercus montana	Angiospermae	Fagaceae	Endophyte	Sordariomycetes (Diaporthales)	Fungi	1	Ascomycota	1	Sordariomycetes	1	Diaporthales	1	Incertae sedis 20	1	Tubakia	1	Tubakia seoraksanensis	SH224249.06FU	1
JQ761075	NC0019	ARIZ:NC0019	158	773	NCH	C1	Quercus montana	Angiospermae	Fagaceae	Endophyte	Sordariomycetes (Diaporthales)	Fungi	1	Ascomycota	1	Sordariomycetes	1	Diaporthales	1	Incertae sedis 20	1	Tubakia	1	Tubakia seoraksanensis	SH224249.06FU	1
JQ761076	NC0021	ARIZ:NC0021	158	773	NCH	C1	Quercus montana	Angiospermae	Fagaceae	Endophyte	Sordariomycetes (Diaporthales)	Fungi	1	Ascomycota	1	Sordariomycetes	1	Diaporthales	1	Incertae sedis 20	1	Tubakia	1	Tubakia seoraksanensis	SH224249.06FU	1
JQ761077	NC0022	ARIZ:NC0022	259	772	NCH	C1	Quercus montana	Angiospermae	Fagaceae	Endophyte	Sordariomycetes (Diaporthales)	Fungi	1	Ascomycota	1	Sordariomycetes	1	Diaporthales	1	Incertae sedis 20	1	Tubakia	1	Tubakia seoraksanensis	SH224249.06FU	1
JQ761078	NC0023	ARIZ:NC0023	158	773	NCH	C1	Quercus montana	Angiospermae	Fagaceae	Endophyte	Sordariomycetes (Diaporthales)	Fungi	1	Ascomycota	1	Sordariomycetes	1	Diaporthales	1	Incertae sedis 20	1	Tubakia	1	Tubakia seoraksanensis	SH224249.06FU	1
JQ761079	NC0024	ARIZ:NC0024	158	773	NCH	C1	Quercus montana	Angiospermae	Fagaceae	Endophyte	Sordariomycetes (Diaporthales)	Fungi	1	Ascomycota	1	Sordariomycetes	1	Diaporthales	1	Incertae sedis 20	1	Tubakia	1	Tubakia seoraksanensis	SH224249.06FU	1
JQ761091	NC0036	ARIZ:NC0036	158	776	NCH	C2	Quercus montana	Angiospermae	Fagaceae	Endophyte	Sordariomycetes (Diaporthales)	Fungi	1	Ascomycota	1	Sordariomycetes	1	Diaporthales	1	Incertae sedis 20	1	Tubakia	1	Tubakia seoraksanensis	SH224249.06FU	1
JQ761092	NC0037	ARIZ:NC0037	158	776	NCH	C2	Quercus montana	Angiospermae	Fagaceae	Endophyte	Sordariomycetes (Diaporthales)	Fungi	1	Ascomycota	1	Sordariomycetes	1	Diaporthales	1	Incertae sedis 20	1	Tubakia	1	Tubakia seoraksanensis	SH224249.06FU	1
JQ761093	NC0038	ARIZ:NC0038	158	776	NCH	C2	Quercus montana	Angiospermae	Fagaceae	Endophyte	Sordariomycetes (Diaporthales)	Fungi	1	Ascomycota	1	Sordariomycetes	1	Diaporthales	1	Incertae sedis 20	1	Tubakia	1	Tubakia seoraksanensis	SH224249.06FU	1
JQ761094	NC0039	ARIZ:NC0039	158	776	NCH	C2	Quercus montana	Angiospermae	Fagaceae	Endophyte	Sordariomycetes (Diaporthales)	Fungi	1	Ascomycota	1	Sordariomycetes	1	Diaporthales	1	Incertae sedis 20	1	Tubakia	1	Tubakia seoraksanensis	SH224249.06FU	1
JQ761095	NC0040	ARIZ:NC0040	158	776	NCH	C2	Quercus montana	Angiospermae	Fagaceae	Endophyte	Sordariomycetes (Diaporthales)	Fungi	1	Ascomycota	1	Sordariomycetes	1	Diaporthales	1	Incertae sedis 20	1	Tubakia	1	Tubakia seoraksanensis	SH224249.06FU	1
JQ761096	NC0041	ARIZ:NC0041	158	773	NCH	C3	Quercus montana	Angiospermae	Fagaceae	Endophyte	Sordariomycetes (Diaporthales)	Fungi	1	Ascomycota	1	Sordariomycetes	1	Diaporthales	1	Incertae sedis 20	1	Tubakia	1	Tubakia seoraksanensis	SH224249.06FU	1
JQ761097	NC0042	ARIZ:NC0042	158	773	NCH	C3	Quercus montana	Angiospermae	Fagaceae	Endophyte	Sordariomycetes (Diaporthales)	Fungi	1	Ascomycota	1	Sordariomycetes	1	Diaporthales	1	Incertae sedis 20	1	Tubakia	1	Tubakia seoraksanensis	SH224249.06FU	1
JQ761098	NC0043	ARIZ:NC0043	158	773	NCH	C3	Quercus montana	Angiospermae	Fagaceae	Endophyte	Sordariomycetes (Diaporthales)	Fungi	1	Ascomycota	1	Sordariomycetes	1	Diaporthales	1	Incertae sedis 20	1	Tubakia	1	Tubakia seoraksanensis	SH224249.06FU	1
JQ761099	NC0044	ARIZ:NC0044	158	773	NCH	C3	Quercus montana	Angiospermae	Fagaceae	Endophyte	Sordariomycetes (Diaporthales)	Fungi	1	Ascomycota	1	Sordariomycetes	1	Diaporthales	1	Incertae sedis 20	1	Tubakia	1	Tubakia seoraksanensis	SH224249.06FU	1
JQ761102	NC0047	ARIZ:NC0047	158	776	NCH	C2	Quercus montana	Angiospermae	Fagaceae	Endophyte	Sordariomycetes (Diaporthales)	Fungi	1	Ascomycota	1	Sordariomycetes	1	Diaporthales	1	Incertae sedis 20	1	Tubakia	1	Tubakia seoraksanensis	SH224249.06FU	1
JQ761130	NC0074	ARIZ:NC0074	158	776	NCH	C2	Quercus montana	Angiospermae	Fagaceae	Endophyte	Sordariomycetes (Diaporthales)	Fungi	1	Ascomycota	1	Sordariomycetes	1	Diaporthales	1	Incertae sedis 20	1	Tubakia	1	Tubakia seoraksanensis	SH224249.06FU	1
JQ761135	NC0079	ARIZ:NC0079	158	776	NCH	C3	Quercus montana	Angiospermae	Fagaceae	Endophyte	Sordariomycetes (Diaporthales)	Fungi	1	Ascomycota	1	Sordariomycetes	1	Diaporthales	1	Incertae sedis 20	1	Tubakia	1	Tubakia seoraksanensis	SH224249.06FU	1
JQ761141	NC0085	ARIZ:NC0085	158	776	NCH	C2	Quercus montana	Angiospermae	Fagaceae	Endophyte	Sordariomycetes (Diaporthales)	Fungi	1	Ascomycota	1	Sordariomycetes	1	Diaporthales	1	Incertae sedis 20	1	Tubakia	1	Tubakia seoraksanensis	SH224249.06FU	1
JQ761144	NC0088	ARIZ:NC0088	264	785	NCH	C2	Pinus strobus	Pinophyta	Pinaceae	Endophyte	Leotiomycetes (Rhytismatales)	Fungi	1	Ascomycota	1	Leotiomycetes	1	Rhytismatales	1	Rhytismataceae	1	Lophodermium	1	Lophodermium sp	SH198381.06FU	1
JQ761145	NC0089	ARIZ:NC0089	158	775	NCH	C1	Quercus montana	Angiospermae	Fagaceae	Endophyte	Sordariomycetes (Diaporthales)	Fungi	1	Ascomycota	1	Sordariomycetes	1	Diaporthales	1	Incertae sedis 20	1	Tubakia	1	Tubakia seoraksanensis	SH224249.06FU	1
JQ761146	NC0090	ARIZ:NC0090	259	772	NCH	C1	Quercus montana	Angiospermae	Fagaceae	Endophyte	Sordariomycetes (Diaporthales)	Fungi	1	Ascomycota	1	Sordariomycetes	1	Diaporthales	1	Incertae sedis 20	1	Tubakia	1	Tubakia seoraksanensis	SH224249.06FU	1
JQ761147	NC0091	ARIZ:NC0091	158	773	NCH	C1	Quercus montana	Angiospermae	Fagaceae	Endophyte	Sordariomycetes (Diaporthales)	Fungi	1	Ascomycota	1	Sordariomycetes	1	Diaporthales	1	Incertae sedis 20	1	Tubakia	1	Tubakia seoraksanensis	SH224249.06FU	1
JQ761148	NC0092	ARIZ:NC0092	158	773	NCH	C1	Quercus montana	Angiospermae	Fagaceae	Endophyte	Sordariomycetes (Diaporthales)	Fungi	1	Ascomycota	1	Sordariomycetes	1	Diaporthales	1	Incertae sedis 20	1	Tubakia	1	Tubakia seoraksanensis	SH224249.06FU	1
JQ761149	NC0093	ARIZ:NC0093	158	773	NCH	C1	Quercus montana	Angiospermae	Fagaceae	Endophyte	Sordariomycetes (Diaporthales)	Fungi	1	Ascomycota	1	Sordariomycetes	1	Diaporthales	1	Incertae sedis 20	1	Tubakia	1	Tubakia seoraksanensis	SH224249.06FU	1
JQ761150	NC0094	ARIZ:NC0094	259	772	NCH	C1	Quercus montana	Angiospermae	Fagaceae	Endophyte	Sordariomycetes (Diaporthales)	Fungi	1	Ascomycota	1	Sordariomycetes	1	Diaporthales	1	Incertae sedis 20	1	Tubakia	1	Tubakia seoraksanensis	SH224249.06FU	1
JQ761151	NC0096	ARIZ:NC0096	158	776	NCH	C1	Quercus montana	Angiospermae	Fagaceae	Endophyte	Sordariomycetes (Diaporthales)	Fungi	1	Ascomycota	1	Sordariomycetes	1	Diaporthales	1	Incertae sedis 20	1	Tubakia	1	Tubakia seoraksanensis	SH224249.06FU	1
JQ761152	NC0097	ARIZ:NC0097	158	773	NCH	C1	Quercus montana	Angiospermae	Fagaceae	Endophyte	Sordariomycetes (Diaporthales)	Fungi	1	Ascomycota	1	Sordariomycetes	1	Diaporthales	1	Incertae sedis 20	1	Tubakia	1	Tubakia seoraksanensis	SH224249.06FU	1
JQ761162	NC0107	ARIZ:NC0107	158	773	NCH	C1	Quercus montana	Angiospermae	Fagaceae	Endophyte	Sordariomycetes (Diaporthales)	Fungi	1	Ascomycota	1	Sordariomycetes	1	Diaporthales	1	Incertae sedis 20	1	Tubakia	1	Tubakia seoraksanensis	SH224249.06FU	1
JQ761163	NC0108	ARIZ:NC0108	88	787	NCH	C1	Quercus montana	Angiospermae	Fagaceae	Endophyte	Sordariomycetes (N/A)	Fungi	1	Ascomycota	1	Sordariomycetes	1	NA	NA	NA	NA	NA	NA	NA	SH205984.06FU	1
JQ761164	NC0109	ARIZ:NC0109	261	780	NCH	C2	Pinus strobus	Pinophyta	Pinaceae	Endophyte	Dothideomycetes (Botryosphaeriales)	Fungi	1	Ascomycota	1	Dothideomycetes	1	Botryosphaeriales	1	Botryosphaeriaceae	1	Phyllosticta	1	Phyllosticta sp	SH198090.06FU	1
JQ761165	NC0110	ARIZ:NC0110	264	788	NCH	C2	Pinus strobus	Pinophyta	Pinaceae	Endophyte	Leotiomycetes (Rhytismatales)	Fungi	1	Ascomycota	1	Leotiomycetes	1	Rhytismatales	1	Rhytismataceae	1	Lophodermium	1	Lophodermium sp	SH198381.06FU	1
JQ761166	NC0111	ARIZ:NC0111	88	787	NCH	C3	Quercus montana	Angiospermae	Fagaceae	Endophyte	Sordariomycetes (N/A)	Fungi	1	Ascomycota	1	Sordariomycetes	1	NA	NA	NA	NA	NA	NA	NA	SH205984.06FU	0.99
JQ761167	NC0112	ARIZ:NC0112	158	773	NCH	C3	Quercus montana	Angiospermae	Fagaceae	Endophyte	Sordariomycetes (Diaporthales)	Fungi	1	Ascomycota	1	Sordariomycetes	1	Diaporthales	1	Incertae sedis 20	1	Tubakia	1	Tubakia seoraksanensis	SH224249.06FU	1
JQ761168	NC0113	ARIZ:NC0113	88	787	NCH	C3	Quercus montana	Angiospermae	Fagaceae	Endophyte	Sordariomycetes (N/A)	Fungi	1	Ascomycota	1	Sordariomycetes	1	NA	NA	NA	NA	NA	NA	NA	SH205984.06FU	0.99
JQ761169	NC0114	ARIZ:NC0114	259	772	NCH	C1	Quercus montana	Angiospermae	Fagaceae	Endophyte	Sordariomycetes (Diaporthales)	Fungi	1	Ascomycota	1	Sordariomycetes	1	Diaporthales	1	Incertae sedis 20	1	Tubakia	1	Tubakia seoraksanensis	SH224249.06FU	1
JQ761170	NC0115	ARIZ:NC0115	259	772	NCH	C1	Quercus montana	Angiospermae	Fagaceae	Endophyte	Sordariomycetes (Diaporthales)	Fungi	1	Ascomycota	1	Sordariomycetes	1	Diaporthales	1	Incertae sedis 20	1	Tubakia	1	Tubakia seoraksanensis	SH224249.06FU	1
JQ761172	NC0117	ARIZ:NC0117	141	790	NCH	C3	Pinus strobus	Pinophyta	Pinaceae	Endophyte	Leotiomycetes (Rhytismatales)	Fungi	1	Ascomycota	1	Leotiomycetes	1	Rhytismatales	1	Rhytismataceae	1	Lophodermium	1	Lophodermium sp lodou Oaxaca	SH198386.06FU	0.99
JQ761173	NC0118	ARIZ:NC0118	141	790	NCH	C3	Pinus strobus	Pinophyta	Pinaceae	Endophyte	Leotiomycetes (Rhytismatales)	Fungi	1	Ascomycota	1	Leotiomycetes	1	Rhytismatales	1	Rhytismataceae	1	Lophodermium	1	Lophodermium sp lodou Oaxaca	SH198386.06FU	0.99
JQ761174	NC0119	ARIZ:NC0119	16	175	NCH	C2	Pinus strobus	Pinophyta	Pinaceae	Endophyte	Eurotiomycetes (Eurotiales)	Fungi	1	Ascomycota	1	Eurotiomycetes	1	Eurotiales	1	Trichocomaceae	1	Penicillium	0.99	Penicillium sp	SH201041.06FU	0.89
JQ761252	NC0205	ARIZ:NC0205	264	795	NCH	C2	Pinus strobus	Pinophyta	Pinaceae	Endophyte	Leotiomycetes (Rhytismatales)	Fungi	1	Ascomycota	1	Leotiomycetes	1	Rhytismatales	1	Rhytismataceae	1	Lophodermium	1	Lophodermium sp	SH198381.06FU	1
JQ761253	NC0206	ARIZ:NC0206	264	795	NCH	C2	Pinus strobus	Pinophyta	Pinaceae	Endophyte	Leotiomycetes (Rhytismatales)	Fungi	1	Ascomycota	1	Leotiomycetes	1	Rhytismatales	1	Rhytismataceae	1	Lophodermium	1	Lophodermium sp	SH198381.06FU	1
JQ761273	NC0227	ARIZ:NC0227	88	787	NCH	C3	Quercus montana	Angiospermae	Fagaceae	Endophyte	Sordariomycetes (N/A)	Fungi	1	Ascomycota	1	Sordariomycetes	1	NA	NA	NA	NA	NA	NA	NA	SH205984.06FU	1
JQ761274	NC0228	ARIZ:NC0228	158	776	NCH	C3	Quercus montana	Angiospermae	Fagaceae	Endophyte	Sordariomycetes (Diaporthales)	Fungi	1	Ascomycota	1	Sordariomycetes	1	Diaporthales	1	Incertae sedis 20	1	Tubakia	1	Tubakia seoraksanensis	SH224249.06FU	1
JQ761275	NC0229	ARIZ:NC0229	264	788	NCH	C2	Pinus strobus	Pinophyta	Pinaceae	Endophyte	Leotiomycetes (Rhytismatales)	Fungi	1	Ascomycota	1	Leotiomycetes	1	Rhytismatales	1	Rhytismataceae	1	Lophodermium	1	Lophodermium sp	SH198381.06FU	1
JQ761276	NC0230	ARIZ:NC0230	266	798	NCH	C3	Pinus strobus	Pinophyta	Pinaceae	Endophyte	N/A	Fungi	1	Ascomycota	1	NA	NA	NA	NA	NA	NA	NA	NA	NA	NA	NA
JQ761292	NC0247	ARIZ:NC0247	265	791	NCH	C3	Quercus montana	Angiospermae	Fagaceae	Endophyte	Dothideomycetes (N/A)	Fungi	1	Ascomycota	1	Dothideomycetes	1	NA	NA	NA	NA	NA	NA	NA	SH216152.06FU	1
JQ761294	NC0249	ARIZ:NC0249	88	787	NCH	C3	Quercus montana	Angiospermae	Fagaceae	Endophyte	Sordariomycetes (N/A)	Fungi	1	Ascomycota	1	Sordariomycetes	1	NA	NA	NA	NA	NA	NA	NA	SH205984.06FU	1
JQ761296	NC0251	ARIZ:NC0251	264	800	NCH	C2	Quercus montana	Angiospermae	Fagaceae	Endophyte	Leotiomycetes (Rhytismatales)	Fungi	1	Ascomycota	1	Leotiomycetes	1	Rhytismatales	1	Rhytismataceae	1	Lophodermium	1	Lophodermium sp	SH198381.06FU	1
JQ761297	NC0252	ARIZ:NC0252	88	787	NCH	C2	Pinus strobus	Pinophyta	Pinaceae	Endophyte	Sordariomycetes (N/A)	Fungi	1	Ascomycota	1	Sordariomycetes	1	NA	NA	NA	NA	NA	NA	NA	SH205984.06FU	1
JQ761298	NC0254	ARIZ:NC0254	264	786	NCH	C3	Pinus strobus	Pinophyta	Pinaceae	Endophyte	Leotiomycetes (Rhytismatales)	Fungi	1	Ascomycota	1	Leotiomycetes	1	Rhytismatales	1	Rhytismataceae	1	Lophodermium	1	Lophodermium sp	SH198381.06FU	1
JQ761299	NC0255	ARIZ:NC0255	264	801	NCH	C2	Pinus strobus	Pinophyta	Pinaceae	Endophyte	Leotiomycetes (Rhytismatales)	Fungi	1	Ascomycota	1	Leotiomycetes	1	Rhytismatales	1	Rhytismataceae	1	Lophodermium	1	Lophodermium sp	SH198381.06FU	1
JQ761301	NC0257	ARIZ:NC0257	158	773	NCH	C3	Quercus montana	Angiospermae	Fagaceae	Endophyte	Sordariomycetes (Diaporthales)	Fungi	1	Ascomycota	1	Sordariomycetes	1	Diaporthales	1	Incertae sedis 20	1	Tubakia	1	Tubakia seoraksanensis	SH224249.06FU	1
JQ761306	NC0267	ARIZ:NC0267	267	805	NCH	C1	Tsuga canadensis	Pinophyta	Pinaceae	Endophyte	Dothideomycetes (N/A)	Fungi	1	Ascomycota	1	Dothideomycetes	1	NA	NA	NA	NA	NA	NA	NA	SH239242.06FU	1
JQ761337	NC0301	ARIZ:NC0301	268	814	NCH	C1	Kalmia latifolia	Angiospermae	Ericaceae	Endophyte	Leotiomycetes (Helotiales)	Fungi	1	Ascomycota	1	Leotiomycetes	1	Helotiales	1	Vibrisseaceae	0.94	NA	NA	NA	NA	NA
JQ761344	NC0308	ARIZ:NC0308	193	815	NCH	C1	Tsuga canadensis	Pinophyta	Pinaceae	Endophyte	Dothideomycetes (Pleosporales)	Fungi	1	Ascomycota	1	Dothideomycetes	1	Pleosporales	1	Lophiostomataceae	1	Lophiostoma	1	Lophiostoma sp OUCMBI101098	SH195482.06FU	1
JQ761448	NC0419	ARIZ:NC0419	270	832	NCH	C2	Tsuga canadensis	Pinophyta	Pinaceae	Endophyte	Leotiomycetes (Helotiales)	Fungi	1	Ascomycota	1	Leotiomycetes	1	Helotiales	1	NA	NA	NA	NA	NA	SH209189.06FU	1
JQ761452	NC0423	ARIZ:NC0423	19	833	NCH	C2	Tsuga canadensis	Pinophyta	Pinaceae	Endophyte	Leotiomycetes (Helotiales)	Fungi	1	Ascomycota	1	Leotiomycetes	1	Helotiales	1	Dermateaceae	1	NA	NA	NA	SH216812.06FU	1
JQ761459	NC0431	ARIZ:NC0431	270	832	NCH	C2	Tsuga canadensis	Pinophyta	Pinaceae	Endophyte	Leotiomycetes (Helotiales)	Fungi	1	Ascomycota	1	Leotiomycetes	1	Helotiales	1	NA	NA	NA	NA	NA	SH209189.06FU	1
JQ761460	NC0432	ARIZ:NC0432	270	832	NCH	C2	Tsuga canadensis	Pinophyta	Pinaceae	Endophyte	Leotiomycetes (Helotiales)	Fungi	1	Ascomycota	1	Leotiomycetes	1	Helotiales	1	NA	NA	NA	NA	NA	SH209189.06FU	1
JQ761463	NC0435	ARIZ:NC0435	270	832	NCH	C2	Tsuga canadensis	Pinophyta	Pinaceae	Endophyte	Leotiomycetes (Helotiales)	Fungi	1	Ascomycota	1	Leotiomycetes	1	Helotiales	1	NA	NA	NA	NA	NA	SH209189.06FU	1
JQ761474	NC0448	ARIZ:NC0448	16	175	NCH	C2	Tsuga canadensis	Pinophyta	Pinaceae	Endophyte	Eurotiomycetes (Eurotiales)	Fungi	1	Ascomycota	1	Eurotiomycetes	1	Eurotiales	1	Trichocomaceae	1	Penicillium	0.99	Penicillium sp	SH201041.06FU	0.89
JQ761477	NC0451	ARIZ:NC0451	19	833	NCH	C2	Tsuga canadensis	Pinophyta	Pinaceae	Endophyte	Leotiomycetes (Helotiales)	Fungi	1	Ascomycota	1	Leotiomycetes	1	Helotiales	1	Dermateaceae	1	NA	NA	NA	SH216812.06FU	1
JQ761482	NC0458	ARIZ:NC0458	270	832	NCH	C2	Tsuga canadensis	Pinophyta	Pinaceae	Endophyte	Leotiomycetes (Helotiales)	Fungi	1	Ascomycota	1	Leotiomycetes	1	Helotiales	1	NA	NA	NA	NA	NA	SH209189.06FU	1
JQ761490	NC0472	ARIZ:NC0472	265	791	NCH	C2	Kalmia latifolia	Angiospermae	Ericaceae	Endophyte	Dothideomycetes (N/A)	Fungi	1	Ascomycota	1	Dothideomycetes	1	NA	NA	NA	NA	NA	NA	NA	SH216152.06FU	1
JQ761516	NC0513	ARIZ:NC0513	270	832	NCH	C2	Tsuga canadensis	Pinophyta	Pinaceae	Endophyte	Leotiomycetes (Helotiales)	Fungi	1	Ascomycota	1	Leotiomycetes	1	Helotiales	1	NA	NA	NA	NA	NA	SH209189.06FU	1
JQ761548	NC0557	ARIZ:NC0557	270	832	NCH	C2	Tsuga canadensis	Pinophyta	Pinaceae	Endophyte	Leotiomycetes (Helotiales)	Fungi	1	Ascomycota	1	Leotiomycetes	1	Helotiales	1	NA	NA	NA	NA	NA	SH209189.06FU	1
JQ761563	NC0574	ARIZ:NC0574	270	832	NCH	C2	Tsuga canadensis	Pinophyta	Pinaceae	Endophyte	Leotiomycetes (Helotiales)	Fungi	1	Ascomycota	1	Leotiomycetes	1	Helotiales	1	NA	NA	NA	NA	NA	SH209189.06FU	1
JQ761564	NC0575	ARIZ:NC0575	270	832	NCH	C2	Tsuga canadensis	Pinophyta	Pinaceae	Endophyte	Leotiomycetes (Helotiales)	Fungi	1	Ascomycota	1	Leotiomycetes	1	Helotiales	1	NA	NA	NA	NA	NA	SH209189.06FU	1
JQ761567	NC0578	ARIZ:NC0578	19	833	NCH	C2	Tsuga canadensis	Pinophyta	Pinaceae	Endophyte	Leotiomycetes (Helotiales)	Fungi	1	Ascomycota	1	Leotiomycetes	1	Helotiales	1	Dermateaceae	1	NA	NA	NA	SH216812.06FU	1
KU683963	NC0622	ARIZ:NC0622	107	715	NCH	C2	Pinus strobus	Pinophyta	Pinaceae	LLF	Sordariomycetes (N/A)	Fungi	1	Ascomycota	1	Sordariomycetes	1	Xylariales	1	Xylariaceae	1	Xylaria	1	Xylaria sp	SH197605.06FU	1
KX908283	NC0623	ARIZ:NC0623	272	858	NCH	C2	Kalmia latifolia	Angiospermae	Ericaceae	LLF	N/A	Fungi	1	Ascomycota	0.72	Sordariomycetes	0.83	Xylariales	0.83	Hyponectriaceae	0.83	Beltraniella	0.83	Beltraniella sp	SH222079.06FU	0.83
KX908284	NC0624	ARIZ:NC0624	272	858	NCH	C2	Kalmia latifolia	Angiospermae	Ericaceae	LLF	N/A	Fungi	1	Ascomycota	0.66	Sordariomycetes	0.83	Xylariales	0.83	Hyponectriaceae	0.83	Beltraniella	0.83	Beltraniella sp	SH222079.06FU	0.83
KX908529	NC0627	ARIZ:NC0627	59	264	NCH	C2	Tsuga canadensis	Pinophyta	Pinaceae	LLF	Dothideomycetes (N/A)	Fungi	1	Ascomycota	1	Dothideomycetes	1	Incertae sedis 8	1	Incertae sedis 19	1	Scleroconidioma	1	Scleroconidioma sphagnicola	SH231448.06FU	1
KX908285	NC0632	ARIZ:NC0632	272	858	NCH	C2	Kalmia latifolia	Angiospermae	Ericaceae	LLF	N/A	Fungi	1	Ascomycota	0.72	Sordariomycetes	0.83	Xylariales	0.83	Hyponectriaceae	0.83	Beltraniella	0.83	Beltraniella sp	SH222079.06FU	0.83
KX908436	NC0633	ARIZ:NC0633	68	859	NCH	C2	Pinus strobus	Pinophyta	Pinaceae	LLF	Leotiomycetes (Helotiales)	Fungi	1	Ascomycota	0.93	Leotiomycetes	0.88	Helotiales	0.88	NA	NA	NA	NA	NA	NA	NA
KX908530	NC0635	ARIZ:NC0635	59	264	NCH	C2	Tsuga canadensis	Pinophyta	Pinaceae	LLF	Dothideomycetes (N/A)	Fungi	1	Ascomycota	1	Dothideomycetes	1	Incertae sedis 8	0.99	Incertae sedis 19	0.99	Scleroconidioma	0.99	Scleroconidioma sphagnicola	SH231448.06FU	0.99
KX908371	NC0636	ARIZ:NC0636	272	858	NCH	C2	Kalmia latifolia	Angiospermae	Ericaceae	LLF	N/A	Fungi	1	Ascomycota	0.72	Sordariomycetes	0.83	Xylariales	0.83	Hyponectriaceae	0.83	Beltraniella	0.83	Beltraniella sp	SH222079.06FU	0.83
KX908531	NC0637	ARIZ:NC0637	73	860	NCH	C2	Tsuga canadensis	Pinophyta	Pinaceae	LLF	Leotiomycetes (Helotiales)	Fungi	1	Ascomycota	0.92	Leotiomycetes	0.84	Helotiales	0.84	NA	NA	NA	NA	NA	NA	NA
KX908286	NC0638	ARIZ:NC0638	272	858	NCH	C2	Kalmia latifolia	Angiospermae	Ericaceae	LLF	N/A	Fungi	1	Ascomycota	0.66	Sordariomycetes	0.83	Xylariales	0.83	Hyponectriaceae	0.83	Beltraniella	0.83	Beltraniella sp	SH222079.06FU	0.83
KX908287	NC0639	ARIZ:NC0639	59	264	NCH	C2	Kalmia latifolia	Angiospermae	Ericaceae	LLF	Dothideomycetes (N/A)	Fungi	1	Ascomycota	1	Dothideomycetes	1	Incertae sedis 8	0.99	Incertae sedis 19	0.99	Scleroconidioma	0.99	Scleroconidioma sphagnicola	SH231448.06FU	0.99
KX908532	NC0640	ARIZ:NC0640	59	264	NCH	C2	Tsuga canadensis	Pinophyta	Pinaceae	LLF	Dothideomycetes (N/A)	Fungi	1	Ascomycota	1	Dothideomycetes	1	Incertae sedis 8	1	Incertae sedis 19	1	Scleroconidioma	1	Scleroconidioma sphagnicola	SH231448.06FU	1
KX908288	NC0641	ARIZ:NC0641	272	858	NCH	C2	Kalmia latifolia	Angiospermae	Ericaceae	LLF	N/A	Fungi	1	Ascomycota	0.72	Sordariomycetes	0.83	Xylariales	0.83	Hyponectriaceae	0.83	Beltraniella	0.83	Beltraniella sp	SH222079.06FU	0.83
KX908289	NC0642	ARIZ:NC0642	272	858	NCH	C2	Kalmia latifolia	Angiospermae	Ericaceae	LLF	N/A	Fungi	1	Ascomycota	0.79	Sordariomycetes	0.83	Xylariales	0.83	Hyponectriaceae	0.83	Beltraniella	0.83	Beltraniella sp	SH222079.06FU	0.83
KX908290	NC0644	ARIZ:NC0644	59	264	NCH	C2	Kalmia latifolia	Angiospermae	Ericaceae	LLF	Dothideomycetes (N/A)	Fungi	1	Ascomycota	1	Dothideomycetes	1	Incertae sedis 8	0.97	Incertae sedis 19	0.97	Scleroconidioma	0.97	Scleroconidioma sphagnicola	SH231448.06FU	0.97
KX908533	NC0645	ARIZ:NC0645	273	861	NCH	C2	Tsuga canadensis	Pinophyta	Pinaceae	LLF	Eurotiomycetes (Eurotiales)	Fungi	1	Ascomycota	1	Eurotiomycetes	1	Eurotiales	1	Trichocomaceae	1	Penicillium	1	Penicillium penicillioides	SH230915.06FU	1
KP202975	NC0646	ARIZ:NC0646	16	175	NCH	C2	Quercus montana	Angiospermae	Fagaceae	LLF	Eurotiomycetes (Eurotiales)	Fungi	1	Ascomycota	1	Eurotiomycetes	1	Eurotiales	1	Trichocomaceae	1	Penicillium	0.99	Penicillium sp	SH201041.06FU	0.89
KU683964	NC0647	ARIZ:NC0647	109	644	NCH	C2	Tsuga canadensis	Pinophyta	Pinaceae	LLF	Sordariomycetes (N/A)	Fungi	1	Ascomycota	1	Sordariomycetes	1	NA	NA	NA	NA	NA	NA	NA	SH227121.06FU	1
KX908534	NC0648	ARIZ:NC0648	59	264	NCH	C2	Tsuga canadensis	Pinophyta	Pinaceae	LLF	Dothideomycetes (N/A)	Fungi	1	Ascomycota	1	Dothideomycetes	1	Incertae sedis 8	1	Incertae sedis 19	1	Scleroconidioma	1	Scleroconidioma sphagnicola	SH231448.06FU	1
KX908437	NC0649	ARIZ:NC0649	264	862	NCH	C2	Pinus strobus	Pinophyta	Pinaceae	LLF	Leotiomycetes (Rhytismatales)	Fungi	1	Ascomycota	1	Leotiomycetes	1	Rhytismatales	1	Rhytismataceae	1	Lophodermium	1	Lophodermium sp	SH198381.06FU	1
KX908535	NC0650	ARIZ:NC0650	273	861	NCH	C2	Tsuga canadensis	Pinophyta	Pinaceae	LLF	Eurotiomycetes (Eurotiales)	Fungi	1	Ascomycota	1	Eurotiomycetes	1	Eurotiales	1	Trichocomaceae	1	Penicillium	1	Penicillium penicillioides	SH230915.06FU	1
KX908291	NC0651	ARIZ:NC0651	59	264	NCH	C2	Kalmia latifolia	Angiospermae	Ericaceae	LLF	Dothideomycetes (N/A)	Fungi	1	Ascomycota	1	Dothideomycetes	1	Incertae sedis 8	0.98	Incertae sedis 19	0.98	Scleroconidioma	0.98	Scleroconidioma sphagnicola	SH231448.06FU	0.98
KX908292	NC0652	ARIZ:NC0652	59	264	NCH	C2	Kalmia latifolia	Angiospermae	Ericaceae	LLF	Dothideomycetes (N/A)	Fungi	1	Ascomycota	1	Dothideomycetes	1	Incertae sedis 8	1	Incertae sedis 19	1	Scleroconidioma	1	Scleroconidioma sphagnicola	SH231448.06FU	1
KX908536	NC0654	ARIZ:NC0654	273	861	NCH	C2	Tsuga canadensis	Pinophyta	Pinaceae	LLF	Eurotiomycetes (Eurotiales)	Fungi	1	Ascomycota	1	Eurotiomycetes	1	Eurotiales	1	Trichocomaceae	1	Penicillium	1	Penicillium penicillioides	SH230915.06FU	1
KX908438	NC0657	ARIZ:NC0657	273	861	NCH	C2	Pinus strobus	Pinophyta	Pinaceae	LLF	Eurotiomycetes (Eurotiales)	Fungi	1	Ascomycota	1	Eurotiomycetes	1	Eurotiales	1	Trichocomaceae	1	Penicillium	1	Penicillium penicillioides	SH230915.06FU	1
KX908537	NC0658	ARIZ:NC0658	274	863	NCH	C2	Tsuga canadensis	Pinophyta	Pinaceae	LLF	N/A	Fungi	1	Ascomycota	1	NA	NA	NA	NA	NA	NA	NA	NA	NA	SH189865.06FU	0.97
KX908439	NC0660	ARIZ:NC0660	264	864	NCH	C2	Pinus strobus	Pinophyta	Pinaceae	LLF	Leotiomycetes (Rhytismatales)	Fungi	1	Ascomycota	1	Leotiomycetes	1	Rhytismatales	1	Rhytismataceae	1	Lophodermium	1	Lophodermium sp	SH198381.06FU	1
KX908293	NC0661	ARIZ:NC0661	272	858	NCH	C2	Kalmia latifolia	Angiospermae	Ericaceae	LLF	N/A	Fungi	1	Ascomycota	0.72	Sordariomycetes	0.83	Xylariales	0.83	Hyponectriaceae	0.83	Beltraniella	0.83	Beltraniella sp	SH222079.06FU	0.83
KX908294	NC0662	ARIZ:NC0662	272	858	NCH	C2	Kalmia latifolia	Angiospermae	Ericaceae	LLF	N/A	Fungi	1	Ascomycota	0.68	Sordariomycetes	0.83	Xylariales	0.83	Hyponectriaceae	0.83	Beltraniella	0.83	Beltraniella sp	SH222079.06FU	0.83
KX908295	NC0664	ARIZ:NC0664	265	791	NCH	C2	Kalmia latifolia	Angiospermae	Ericaceae	LLF	Dothideomycetes (N/A)	Fungi	1	Ascomycota	1	Dothideomycetes	1	NA	NA	NA	NA	NA	NA	NA	SH216152.06FU	1
KX908296	NC0665	ARIZ:NC0665	59	264	NCH	C2	Kalmia latifolia	Angiospermae	Ericaceae	LLF	Dothideomycetes (N/A)	Fungi	1	Ascomycota	1	Dothideomycetes	1	Incertae sedis 8	0.99	Incertae sedis 19	0.99	Scleroconidioma	0.99	Scleroconidioma sphagnicola	SH231448.06FU	0.99
KX908538	NC0667	ARIZ:NC0667	273	861	NCH	C2	Tsuga canadensis	Pinophyta	Pinaceae	LLF	Eurotiomycetes (Eurotiales)	Fungi	1	Ascomycota	1	Eurotiomycetes	1	Eurotiales	1	Trichocomaceae	1	Penicillium	1	Penicillium penicillioides	SH230915.06FU	1
KX908539	NC0668	ARIZ:NC0668	273	861	NCH	C2	Tsuga canadensis	Pinophyta	Pinaceae	LLF	Eurotiomycetes (Eurotiales)	Fungi	1	Ascomycota	1	Eurotiomycetes	1	Eurotiales	1	Trichocomaceae	1	Penicillium	1	Penicillium penicillioides	SH230915.06FU	1
KX908440	NC0669	ARIZ:NC0669	275	865	NCH	C2	Pinus strobus	Pinophyta	Pinaceae	LLF	Leotiomycetes (Helotiales)	Fungi	1	Ascomycota	0.98	Leotiomycetes	0.98	Helotiales	0.98	Helotiales unidentified	0.98	Helotiales unidentified 1	0.98	NA	NA	NA
KU683965	NC0670	ARIZ:NC0670	176	519	NCH	C2	Tsuga canadensis	Pinophyta	Pinaceae	LLF	Sordariomycetes (Xylariales)	Fungi	1	Ascomycota	1	Sordariomycetes	1	Xylariales	1	Xylariaceae	1	Nodulisporium	1	Nodulisporium sp	SH225514.06FU	1
KX908540	NC0671	ARIZ:NC0671	19	148	NCH	C2	Tsuga canadensis	Pinophyta	Pinaceae	LLF	Leotiomycetes (N/A)	Fungi	1	Ascomycota	1	Leotiomycetes	0.94	Helotiales	1	Dermateaceae	1	NA	NA	NA	SH216812.06FU	1
KX908297	NC0672	ARIZ:NC0672	19	148	NCH	C2	Kalmia latifolia	Angiospermae	Ericaceae	LLF	Leotiomycetes (N/A)	Fungi	1	Ascomycota	1	Leotiomycetes	0.98	Helotiales	1	Dermateaceae	1	NA	NA	NA	SH216812.06FU	1
KX908441	NC0673	ARIZ:NC0673	276	866	NCH	C2	Pinus strobus	Pinophyta	Pinaceae	LLF	N/A	Fungi	1	Ascomycota	1	Incertae sedis 14	1	Incertae sedis 15	1	Incertae sedis 16	1	Ochroconis	1	Ochroconis calidifluminalis	SH241393.06FU	1
KX908298	NC0674	ARIZ:NC0674	19	148	NCH	C2	Kalmia latifolia	Angiospermae	Ericaceae	LLF	Leotiomycetes (N/A)	Fungi	1	Ascomycota	1	Leotiomycetes	0.92	Helotiales	1	Dermateaceae	1	NA	NA	NA	SH216812.06FU	1
KX908541	NC0675	ARIZ:NC0675	19	148	NCH	C2	Tsuga canadensis	Pinophyta	Pinaceae	LLF	Leotiomycetes (N/A)	Fungi	1	Ascomycota	1	Leotiomycetes	0.94	Helotiales	1	Dermateaceae	1	NA	NA	NA	SH216812.06FU	1
KX908542	NC0676	ARIZ:NC0676	273	861	NCH	C2	Tsuga canadensis	Pinophyta	Pinaceae	LLF	Eurotiomycetes (Eurotiales)	Fungi	1	Ascomycota	1	Eurotiomycetes	1	Eurotiales	1	Trichocomaceae	1	Penicillium	1	Penicillium penicillioides	SH230915.06FU	1
KX908442	NC0677	ARIZ:NC0677	276	866	NCH	C2	Pinus strobus	Pinophyta	Pinaceae	LLF	N/A	Fungi	1	Ascomycota	1	Incertae sedis 14	0.99	Incertae sedis 15	0.99	Incertae sedis 16	0.99	Ochroconis	0.99	Ochroconis calidifluminalis	SH241393.06FU	0.99
KX908543	NC0678	ARIZ:NC0678	277	867	NCH	C2	Tsuga canadensis	Pinophyta	Pinaceae	LLF	Leotiomycetes (Helotiales)	Fungi	1	Ascomycota	1	Leotiomycetes	0.97	Helotiales	0.96	NA	NA	NA	NA	NA	NA	NA
KX908544	NC0679	ARIZ:NC0679	274	863	NCH	C2	Tsuga canadensis	Pinophyta	Pinaceae	LLF	N/A	Fungi	1	Ascomycota	1	NA	NA	NA	NA	NA	NA	NA	NA	NA	SH189865.06FU	0.97
KU683966	NC0680	ARIZ:NC0680	176	589	NCH	C2	Quercus montana	Angiospermae	Fagaceae	LLF	Sordariomycetes (Xylariales)	Fungi	1	Ascomycota	1	Sordariomycetes	1	Xylariales	1	Xylariaceae	1	Nodulisporium	1	Nodulisporium sp	SH225514.06FU	1
KX908299	NC0681	ARIZ:NC0681	272	858	NCH	C2	Kalmia latifolia	Angiospermae	Ericaceae	LLF	N/A	Fungi	1	Ascomycota	0.77	Sordariomycetes	0.83	Xylariales	0.83	Hyponectriaceae	0.83	Beltraniella	0.83	Beltraniella sp	SH222079.06FU	0.83
KX908545	NC0682	ARIZ:NC0682	274	863	NCH	C2	Tsuga canadensis	Pinophyta	Pinaceae	LLF	N/A	Fungi	1	Ascomycota	1	NA	NA	NA	NA	NA	NA	NA	NA	NA	SH189865.06FU	0.97
KX908546	NC0683	ARIZ:NC0683	41	67	NCH	C2	Tsuga canadensis	Pinophyta	Pinaceae	LLF	Dothideomycetes (Dothideales)	Fungi	1	Ascomycota	1	Dothideomycetes	1	Dothideales	0.97	Dothioraceae	0.97	NA	NA	NA	SH231446.06FU	0.97
KU683967	NC0684	ARIZ:NC0684	262	782	NCH	C2	Quercus montana	Angiospermae	Fagaceae	LLF	Sordariomycetes (Xylariales)	Fungi	1	Ascomycota	1	Sordariomycetes	1	Xylariales	1	Xylariaceae	1	NA	NA	NA	SH193307.06FU	1
KX908300	NC0685	ARIZ:NC0685	272	858	NCH	C2	Kalmia latifolia	Angiospermae	Ericaceae	LLF	N/A	Fungi	1	Ascomycota	0.71	Sordariomycetes	0.83	Xylariales	0.83	Hyponectriaceae	0.83	Beltraniella	0.83	Beltraniella sp	SH222079.06FU	0.83
KU683968	NC0686	ARIZ:NC0686	175	495	NCH	C2	Pinus strobus	Pinophyta	Pinaceae	LLF	Sordariomycetes (Xylariales)	Fungi	1	Ascomycota	1	Sordariomycetes	1	Xylariales	1	Xylariaceae	1	NA	NA	NA	SH227123.06FU	1
KX908301	NC0687	ARIZ:NC0687	272	858	NCH	C2	Kalmia latifolia	Angiospermae	Ericaceae	LLF	N/A	Fungi	1	Ascomycota	0.76	Sordariomycetes	0.83	Xylariales	0.83	Hyponectriaceae	0.83	Beltraniella	0.83	Beltraniella sp	SH222079.06FU	0.83
KX908302	NC0688	ARIZ:NC0688	272	858	NCH	C2	Kalmia latifolia	Angiospermae	Ericaceae	LLF	N/A	Fungi	1	Ascomycota	0.72	Sordariomycetes	0.83	Xylariales	0.83	Hyponectriaceae	0.83	Beltraniella	0.83	Beltraniella sp	SH222079.06FU	0.83
KX908303	NC0689	ARIZ:NC0689	272	858	NCH	C2	Kalmia latifolia	Angiospermae	Ericaceae	LLF	N/A	Fungi	1	Ascomycota	0.71	Sordariomycetes	0.83	Xylariales	0.83	Hyponectriaceae	0.83	Beltraniella	0.83	Beltraniella sp	SH222079.06FU	0.83
KX908547	NC0690	ARIZ:NC0690	270	832	NCH	C2	Tsuga canadensis	Pinophyta	Pinaceae	LLF	Leotiomycetes (Helotiales)	Fungi	1	Ascomycota	1	Leotiomycetes	1	Helotiales	1	NA	NA	NA	NA	NA	SH209189.06FU	1
KX908548	NC0691	ARIZ:NC0691	238	868	NCH	C2	Tsuga canadensis	Pinophyta	Pinaceae	LLF	Sordariomycetes (Hypocreales)	Fungi	1	Ascomycota	1	Sordariomycetes	1	Hypocreales	1	Nectriaceae	1	Fusarium	0.93	NA	NA	NA
KX908304	NC0692	ARIZ:NC0692	272	858	NCH	C2	Kalmia latifolia	Angiospermae	Ericaceae	LLF	N/A	Fungi	1	Ascomycota	0.72	Sordariomycetes	0.83	Xylariales	0.83	Hyponectriaceae	0.83	Beltraniella	0.83	Beltraniella sp	SH222079.06FU	0.83
KX908305	NC0693	ARIZ:NC0693	19	148	NCH	C2	Kalmia latifolia	Angiospermae	Ericaceae	LLF	Leotiomycetes (N/A)	Fungi	1	Ascomycota	1	Leotiomycetes	0.92	Helotiales	1	Dermateaceae	1	NA	NA	NA	SH216812.06FU	1
KX908306	NC0695	ARIZ:NC0695	272	858	NCH	C2	Kalmia latifolia	Angiospermae	Ericaceae	LLF	N/A	Fungi	1	Ascomycota	0.72	Sordariomycetes	0.83	Xylariales	0.83	Hyponectriaceae	0.83	Beltraniella	0.83	Beltraniella sp	SH222079.06FU	0.83
KX908307	NC0696	ARIZ:NC0696	19	869	NCH	C2	Kalmia latifolia	Angiospermae	Ericaceae	LLF	Leotiomycetes (Helotiales)	Fungi	1	Ascomycota	1	Leotiomycetes	1	Helotiales	0.81	Dermateaceae	1	NA	NA	NA	SH216812.06FU	1
KX908443	NC0697	ARIZ:NC0697	53	870	NCH	C2	Pinus strobus	Pinophyta	Pinaceae	LLF	Leotiomycetes (Helotiales)	Fungi	1	Ascomycota	1	Leotiomycetes	1	Helotiales	1	NA	NA	NA	NA	NA	SH209354.06FU	1
KX908444	NC0698	ARIZ:NC0698	53	870	NCH	C2	Pinus strobus	Pinophyta	Pinaceae	LLF	Leotiomycetes (Helotiales)	Fungi	1	Ascomycota	1	Leotiomycetes	1	Helotiales	1	NA	NA	NA	NA	NA	SH209354.06FU	1
KX908308	NC0699	ARIZ:NC0699	59	264	NCH	C2	Kalmia latifolia	Angiospermae	Ericaceae	LLF	Dothideomycetes (N/A)	Fungi	1	Ascomycota	1	Dothideomycetes	1	Incertae sedis 8	0.97	Incertae sedis 19	0.97	Scleroconidioma	0.97	Scleroconidioma sphagnicola	SH231448.06FU	0.97
KX908309	NC0700	ARIZ:NC0700	272	858	NCH	C2	Kalmia latifolia	Angiospermae	Ericaceae	LLF	N/A	Fungi	1	Ascomycota	0.71	Sordariomycetes	0.83	Xylariales	0.83	Hyponectriaceae	0.83	Beltraniella	0.83	Beltraniella sp	SH222079.06FU	0.83
KX908549	NC0701	ARIZ:NC0701	278	871	NCH	C2	Tsuga canadensis	Pinophyta	Pinaceae	LLF	Leotiomycetes (N/A)	Fungi	1	Ascomycota	1	Leotiomycetes	0.81	NA	NA	NA	NA	NA	NA	NA	NA	NA
KX908445	NC0703	ARIZ:NC0703	53	870	NCH	C2	Pinus strobus	Pinophyta	Pinaceae	LLF	Leotiomycetes (Helotiales)	Fungi	1	Ascomycota	1	Leotiomycetes	1	Helotiales	1	NA	NA	NA	NA	NA	SH209354.06FU	1
KX908310	NC0704	ARIZ:NC0704	19	148	NCH	C2	Kalmia latifolia	Angiospermae	Ericaceae	LLF	Leotiomycetes (N/A)	Fungi	1	Ascomycota	1	Leotiomycetes	0.95	Helotiales	1	Dermateaceae	1	NA	NA	NA	SH216812.06FU	1
KX908446	NC0705	ARIZ:NC0705	264	872	NCH	C2	Pinus strobus	Pinophyta	Pinaceae	LLF	Leotiomycetes (Rhytismatales)	Fungi	1	Ascomycota	1	Leotiomycetes	1	Rhytismatales	1	Rhytismataceae	1	Lophodermium	1	Lophodermium sp	SH198381.06FU	1
KX908447	NC0706	ARIZ:NC0706	53	870	NCH	C2	Pinus strobus	Pinophyta	Pinaceae	LLF	Leotiomycetes (Helotiales)	Fungi	1	Ascomycota	1	Leotiomycetes	1	Helotiales	1	NA	NA	NA	NA	NA	SH209354.06FU	1
KX908550	NC0707	ARIZ:NC0707	274	863	NCH	C2	Tsuga canadensis	Pinophyta	Pinaceae	LLF	N/A	Fungi	1	Ascomycota	1	NA	NA	NA	NA	NA	NA	NA	NA	NA	SH189865.06FU	0.97
KU683969	NC0708	ARIZ:NC0708	279	873	NCH	C2	Pinus strobus	Pinophyta	Pinaceae	LLF	Sordariomycetes (Xylariales)	Fungi	1	Ascomycota	1	Sordariomycetes	1	Xylariales	0.93	Xylariaceae	0.83	NA	NA	NA	NA	NA
KX908551	NC0710	ARIZ:NC0710	59	264	NCH	C2	Tsuga canadensis	Pinophyta	Pinaceae	LLF	Dothideomycetes (N/A)	Fungi	1	Ascomycota	1	Dothideomycetes	1	Incertae sedis 8	1	Incertae sedis 19	1	Scleroconidioma	1	Scleroconidioma sphagnicola	SH231448.06FU	1
KX908448	NC0711	ARIZ:NC0711	82	442	NCH	C2	Pinus strobus	Pinophyta	Pinaceae	LLF	Dothideomycetes (Pleosporales)	Fungi	1	Ascomycota	1	Dothideomycetes	1	Pleosporales	1	NA	NA	NA	NA	NA	SH230642.06FU	1
KX908449	NC0712	ARIZ:NC0712	53	870	NCH	C2	Pinus strobus	Pinophyta	Pinaceae	LLF	Leotiomycetes (Helotiales)	Fungi	1	Ascomycota	1	Leotiomycetes	1	Helotiales	1	NA	NA	NA	NA	NA	SH209354.06FU	1
KX908311	NC0714	ARIZ:NC0714	59	264	NCH	C2	Kalmia latifolia	Angiospermae	Ericaceae	LLF	Dothideomycetes (N/A)	Fungi	1	Ascomycota	1	Dothideomycetes	1	Incertae sedis 8	0.98	Incertae sedis 19	0.98	Scleroconidioma	0.98	Scleroconidioma sphagnicola	SH231448.06FU	0.98
KX908312	NC0716	ARIZ:NC0716	280	874	NCH	C2	Kalmia latifolia	Angiospermae	Ericaceae	LLF	Dothideomycetes (N/A)	Fungi	1	Ascomycota	1	Dothideomycetes	1	NA	NA	NA	NA	NA	NA	NA	NA	NA
KX908450	NC0717	ARIZ:NC0717	264	862	NCH	C2	Pinus strobus	Pinophyta	Pinaceae	LLF	Leotiomycetes (Rhytismatales)	Fungi	1	Ascomycota	1	Leotiomycetes	1	Rhytismatales	1	Rhytismataceae	1	Lophodermium	1	Lophodermium sp	SH198381.06FU	1
KX908215	NC0718	ARIZ:NC0718	281	875	NCH	C2	Pinus strobus	Pinophyta	Pinaceae	LLF	Leotiomycetes (Helotiales)	Fungi	1	Ascomycota	1	Leotiomycetes	0.82	Helotiales	0.82	NA	NA	NA	NA	NA	NA	NA
KX908451	NC0719	ARIZ:NC0719	275	865	NCH	C2	Pinus strobus	Pinophyta	Pinaceae	LLF	Leotiomycetes (Helotiales)	Fungi	1	Ascomycota	0.99	Leotiomycetes	0.99	Helotiales	0.99	Helotiales unidentified	0.99	Helotiales unidentified 1	0.99	NA	NA	NA
KX908552	NC0720	ARIZ:NC0720	283	876	NCH	C2	Tsuga canadensis	Pinophyta	Pinaceae	LLF	Dothideomycetes (N/A)	Fungi	1	Ascomycota	1	Dothideomycetes	1	NA	NA	NA	NA	NA	NA	NA	NA	NA
KX908553	NC0721	ARIZ:NC0721	59	264	NCH	C2	Tsuga canadensis	Pinophyta	Pinaceae	LLF	Dothideomycetes (N/A)	Fungi	1	Ascomycota	1	Dothideomycetes	1	Incertae sedis 8	1	Incertae sedis 19	1	Scleroconidioma	1	Scleroconidioma sphagnicola	SH231448.06FU	1
KX908313	NC0724	ARIZ:NC0724	19	148	NCH	C2	Kalmia latifolia	Angiospermae	Ericaceae	LLF	Leotiomycetes (N/A)	Fungi	1	Ascomycota	1	Leotiomycetes	0.92	Helotiales	1	Dermateaceae	1	NA	NA	NA	SH216812.06FU	1
KX908314	NC0727	ARIZ:NC0727	272	858	NCH	C2	Kalmia latifolia	Angiospermae	Ericaceae	LLF	N/A	Fungi	1	Ascomycota	0.66	Sordariomycetes	0.83	Xylariales	0.83	Hyponectriaceae	0.83	Beltraniella	0.83	Beltraniella sp	SH222079.06FU	0.83
KX908315	NC0728	ARIZ:NC0728	59	264	NCH	C2	Kalmia latifolia	Angiospermae	Ericaceae	LLF	Dothideomycetes (N/A)	Fungi	1	Ascomycota	1	Dothideomycetes	1	Incertae sedis 8	0.99	Incertae sedis 19	0.99	Scleroconidioma	0.99	Scleroconidioma sphagnicola	SH231448.06FU	0.99
KX908554	NC0730	ARIZ:NC0730	68	877	NCH	C2	Tsuga canadensis	Pinophyta	Pinaceae	LLF	N/A	Fungi	1	Ascomycota	1	Leotiomycetes	1	Helotiales	1	NA	NA	NA	NA	NA	SH208258.06FU	0.91
KX908452	NC0731	ARIZ:NC0731	53	870	NCH	C2	Pinus strobus	Pinophyta	Pinaceae	LLF	Leotiomycetes (Helotiales)	Fungi	1	Ascomycota	1	Leotiomycetes	1	Helotiales	1	NA	NA	NA	NA	NA	SH209354.06FU	1
KX908555	NC0732	ARIZ:NC0732	273	861	NCH	C2	Tsuga canadensis	Pinophyta	Pinaceae	LLF	Eurotiomycetes (Eurotiales)	Fungi	1	Ascomycota	1	Eurotiomycetes	1	Eurotiales	1	Trichocomaceae	1	Penicillium	1	Penicillium penicillioides	SH230915.06FU	1
KX908316	NC0734	ARIZ:NC0734	19	148	NCH	C2	Kalmia latifolia	Angiospermae	Ericaceae	LLF	Leotiomycetes (N/A)	Fungi	1	Ascomycota	1	Leotiomycetes	0.92	Helotiales	1	Dermateaceae	1	NA	NA	NA	SH216812.06FU	1
KX908317	NC0735	ARIZ:NC0735	272	858	NCH	C1	Kalmia latifolia	Angiospermae	Ericaceae	LLF	N/A	Fungi	1	Ascomycota	0.72	Sordariomycetes	0.83	Xylariales	0.83	Hyponectriaceae	0.83	Beltraniella	0.83	Beltraniella sp	SH222079.06FU	0.83
KX908453	NC0736	ARIZ:NC0736	264	786	NCH	C1	Pinus strobus	Pinophyta	Pinaceae	LLF	Leotiomycetes (Rhytismatales)	Fungi	1	Ascomycota	1	Leotiomycetes	1	Rhytismatales	1	Rhytismataceae	1	Lophodermium	1	Lophodermium sp	SH198381.06FU	1
KX908454	NC0737	ARIZ:NC0737	58	878	NCH	C1	Pinus strobus	Pinophyta	Pinaceae	LLF	Dothideomycetes (Capnodiales)	Fungi	1	Ascomycota	1	Dothideomycetes	1	Capnodiales	0.95	NA	NA	NA	NA	NA	SH238954.06FU	0.87
KX908455	NC0740	ARIZ:NC0740	264	879	NCH	C1	Pinus strobus	Pinophyta	Pinaceae	LLF	Leotiomycetes (Rhytismatales)	Fungi	1	Ascomycota	1	Leotiomycetes	1	Rhytismatales	1	Rhytismataceae	1	Lophodermium	1	Lophodermium sp	SH198381.06FU	1
KX908318	NC0742	ARIZ:NC0742	265	791	NCH	C1	Kalmia latifolia	Angiospermae	Ericaceae	LLF	Dothideomycetes (N/A)	Fungi	1	Ascomycota	1	Dothideomycetes	1	NA	NA	NA	NA	NA	NA	NA	SH216152.06FU	1
KX908216	NC0743	ARIZ:NC0743	284	880	NCH	C1	Quercus montana	Angiospermae	Fagaceae	LLF	Dothideomycetes (Pleosporales)	Fungi	1	Ascomycota	1	Dothideomycetes	1	Pleosporales	1	Pleosporaceae	1	Embellisia	0.9	Embellisia planifunda	SH224790.06FU	0.9
KX908556	NC0744	ARIZ:NC0744	59	264	NCH	C1	Tsuga canadensis	Pinophyta	Pinaceae	LLF	Dothideomycetes (N/A)	Fungi	1	Ascomycota	1	Dothideomycetes	1	Incertae sedis 8	1	Incertae sedis 19	1	Scleroconidioma	1	Scleroconidioma sphagnicola	SH231448.06FU	1
KX908557	NC0745	ARIZ:NC0745	18	596	NCH	C1	Tsuga canadensis	Pinophyta	Pinaceae	LLF	Sordariomycetes (Coniochaetales)	Fungi	1	Ascomycota	1	Sordariomycetes	1	Coniochaetales	0.98	Coniochaetaceae	0.98	Lecythophora	0.98	Lecythophora hoffmannii	SH226439.06FU	0.98
KX908319	NC0746	ARIZ:NC0746	59	264	NCH	C1	Kalmia latifolia	Angiospermae	Ericaceae	LLF	Dothideomycetes (N/A)	Fungi	1	Ascomycota	1	Dothideomycetes	1	Incertae sedis 8	0.97	Incertae sedis 19	0.97	Scleroconidioma	0.97	Scleroconidioma sphagnicola	SH231448.06FU	0.97
KX908217	NC0748	ARIZ:NC0748	265	791	NCH	C1	Kalmia latifolia	Angiospermae	Ericaceae	LLF	Dothideomycetes (N/A)	Fungi	1	Ascomycota	1	Dothideomycetes	1	NA	NA	NA	NA	NA	NA	NA	SH216152.06FU	1
KU683970	NC0749	ARIZ:NC0749	108	881	NCH	C1	Quercus montana	Angiospermae	Fagaceae	LLF	Sordariomycetes (Hypocreales)	Fungi	1	Ascomycota	1	Sordariomycetes	0.93	Hypocreales	0.93	Nectriaceae	0.93	Cylindrium	0.93	Cylindrium sp	SH189862.06FU	0.93
KX908218	NC0751	ARIZ:NC0751	285	882	NCH	C1	Pinus strobus	Pinophyta	Pinaceae	LLF	N/A	Fungi	1	NA	NA	NA	NA	NA	NA	NA	NA	NA	NA	NA	SH225946.06FU	0.95
KX908320	NC0753	ARIZ:NC0753	272	858	NCH	C1	Kalmia latifolia	Angiospermae	Ericaceae	LLF	N/A	Fungi	1	Ascomycota	0.72	Sordariomycetes	0.83	Xylariales	0.83	Hyponectriaceae	0.83	Beltraniella	0.83	Beltraniella sp	SH222079.06FU	0.83
KX908456	NC0754	ARIZ:NC0754	82	442	NCH	C1	Pinus strobus	Pinophyta	Pinaceae	LLF	Dothideomycetes (Pleosporales)	Fungi	1	Ascomycota	1	Dothideomycetes	1	Pleosporales	1	NA	NA	NA	NA	NA	SH230642.06FU	1
KX908321	NC0755	ARIZ:NC0755	272	858	NCH	C1	Kalmia latifolia	Angiospermae	Ericaceae	LLF	N/A	Fungi	1	Ascomycota	0.72	Sordariomycetes	0.83	Xylariales	0.83	Hyponectriaceae	0.83	Beltraniella	0.83	Beltraniella sp	SH222079.06FU	0.83
KX908457	NC0756	ARIZ:NC0756	264	862	NCH	C1	Pinus strobus	Pinophyta	Pinaceae	LLF	Leotiomycetes (Rhytismatales)	Fungi	1	Ascomycota	1	Leotiomycetes	1	Rhytismatales	1	Rhytismataceae	1	Lophodermium	1	Lophodermium sp	SH198381.06FU	1
KX908322	NC0759	ARIZ:NC0759	272	858	NCH	C1	Kalmia latifolia	Angiospermae	Ericaceae	LLF	N/A	Fungi	1	Ascomycota	0.72	Sordariomycetes	0.83	Xylariales	0.83	Hyponectriaceae	0.83	Beltraniella	0.83	Beltraniella sp	SH222079.06FU	0.83
KU683971	NC0760	ARIZ:NC0760	88	787	NCH	C1	Quercus montana	Angiospermae	Fagaceae	LLF	Sordariomycetes (N/A)	Fungi	1	Ascomycota	1	Sordariomycetes	1	NA	NA	NA	NA	NA	NA	NA	SH205984.06FU	1
KX908323	NC0761	ARIZ:NC0761	265	883	NCH	C1	Kalmia latifolia	Angiospermae	Ericaceae	LLF	Dothideomycetes (N/A)	Fungi	1	Ascomycota	1	Dothideomycetes	1	NA	NA	NA	NA	NA	NA	NA	SH216152.06FU	1
KX908324	NC0763	ARIZ:NC0763	272	858	NCH	C1	Kalmia latifolia	Angiospermae	Ericaceae	LLF	N/A	Fungi	1	Ascomycota	0.76	Sordariomycetes	0.83	Xylariales	0.83	Hyponectriaceae	0.83	Beltraniella	0.83	Beltraniella sp	SH222079.06FU	0.83
KU683972	NC0764	ARIZ:NC0764	108	881	NCH	C1	Quercus montana	Angiospermae	Fagaceae	LLF	N/A	Fungi	1	Ascomycota	1	Incertae sedis 14	0.89	Incertae sedis 15	0.89	Incertae sedis 16	0.89	Polyscytalum	0.89	Polyscytalum sp	SH189863.06FU	0.89
KX908325	NC0765	ARIZ:NC0765	272	858	NCH	C1	Kalmia latifolia	Angiospermae	Ericaceae	LLF	N/A	Fungi	1	Ascomycota	0.71	Sordariomycetes	0.83	Xylariales	0.83	Hyponectriaceae	0.83	Beltraniella	0.83	Beltraniella sp	SH222079.06FU	0.83
KX908326	NC0767	ARIZ:NC0767	265	791	NCH	C1	Kalmia latifolia	Angiospermae	Ericaceae	LLF	Dothideomycetes (N/A)	Fungi	1	Ascomycota	1	Dothideomycetes	1	NA	NA	NA	NA	NA	NA	NA	SH216152.06FU	1
KX908558	NC0769	ARIZ:NC0769	59	264	NCH	C1	Tsuga canadensis	Pinophyta	Pinaceae	LLF	Dothideomycetes (N/A)	Fungi	1	Ascomycota	1	Dothideomycetes	1	Incertae sedis 8	0.99	Incertae sedis 19	0.99	Scleroconidioma	0.99	Scleroconidioma sphagnicola	SH231448.06FU	0.99
KU683973	NC0770	ARIZ:NC0770	88	787	NCH	C1	Quercus montana	Angiospermae	Fagaceae	LLF	Sordariomycetes (Sordariomycetes)	Fungi	1	Ascomycota	1	Sordariomycetes	1	NA	NA	NA	NA	NA	NA	NA	SH205984.06FU	1
KU683974	NC0771	ARIZ:NC0771	108	881	NCH	C1	Quercus montana	Angiospermae	Fagaceae	LLF	Sordariomycetes (Hypocreales)	Fungi	1	Ascomycota	1	Sordariomycetes	0.88	Hypocreales	0.88	Nectriaceae	0.88	Cylindrium	0.88	Cylindrium sp	SH189862.06FU	0.88
KX908559	NC0773	ARIZ:NC0773	238	868	NCH	C1	Tsuga canadensis	Pinophyta	Pinaceae	LLF	Sordariomycetes (Hypocreales)	Fungi	1	Ascomycota	1	Sordariomycetes	1	Hypocreales	1	Nectriaceae	1	Fusarium	0.96	NA	NA	NA
KX908560	NC0774	ARIZ:NC0774	273	861	NCH	C1	Tsuga canadensis	Pinophyta	Pinaceae	LLF	Eurotiomycetes (Eurotiales)	Fungi	1	Ascomycota	1	Eurotiomycetes	1	Eurotiales	1	Trichocomaceae	1	Penicillium	1	Penicillium penicillioides	SH230915.06FU	1
KX908458	NC0775	ARIZ:NC0775	264	884	NCH	C1	Pinus strobus	Pinophyta	Pinaceae	LLF	Leotiomycetes (Rhytismatales)	Fungi	1	Ascomycota	1	Leotiomycetes	1	Rhytismatales	1	Rhytismataceae	1	Lophodermium	1	Lophodermium sp	SH198381.06FU	1
KX908561	NC0776	ARIZ:NC0776	59	885	NCH	C1	Tsuga canadensis	Pinophyta	Pinaceae	LLF	Dothideomycetes (N/A)	Fungi	1	Ascomycota	1	Dothideomycetes	1	Incertae sedis 8	1	Incertae sedis 19	1	Scleroconidioma	1	Scleroconidioma sphagnicola	SH231448.06FU	1
KX908327	NC0777	ARIZ:NC0777	272	858	NCH	C1	Kalmia latifolia	Angiospermae	Ericaceae	LLF	N/A	Fungi	1	Ascomycota	0.72	Sordariomycetes	0.83	Xylariales	0.83	Hyponectriaceae	0.83	Beltraniella	0.83	Beltraniella sp	SH222079.06FU	0.83
KX908328	NC0778	ARIZ:NC0778	286	886	NCH	C1	Kalmia latifolia	Angiospermae	Ericaceae	LLF	Dothideomycetes (Capnodiales)	Fungi	1	Ascomycota	0.97	Dothideomycetes	0.97	Capnodiales	0.96	NA	NA	NA	NA	NA	NA	NA
KX908372	NC0779	ARIZ:NC0779	264	788	NCH	C1	Pinus strobus	Pinophyta	Pinaceae	LLF	Leotiomycetes (Rhytismatales)	Fungi	1	Ascomycota	1	Leotiomycetes	1	Rhytismatales	1	Rhytismataceae	1	Lophodermium	1	Lophodermium sp	SH198381.06FU	1
KX908219	NC0781	ARIZ:NC0781	287	887	NCH	C1	Tsuga canadensis	Pinophyta	Pinaceae	LLF	N/A	Fungi	1	Ascomycota	0.59	NA	NA	NA	NA	NA	NA	NA	NA	NA	NA	NA
KX908495	NC0782	ARIZ:NC0782	288	888	NCH	C1	Quercus montana	Angiospermae	Fagaceae	LLF	Sordariomycetes (Diaporthales)	Fungi	1	Ascomycota	1	Sordariomycetes	1	Diaporthales	1	NA	NA	NA	NA	NA	SH210877.06FU	1
KX908329	NC0784	ARIZ:NC0784	265	791	NCH	C1	Kalmia latifolia	Angiospermae	Ericaceae	LLF	Dothideomycetes (N/A)	Fungi	1	Ascomycota	1	Dothideomycetes	1	NA	NA	NA	NA	NA	NA	NA	SH216152.06FU	1
KX908459	NC0785	ARIZ:NC0785	264	800	NCH	C1	Pinus strobus	Pinophyta	Pinaceae	LLF	Leotiomycetes (Rhytismatales)	Fungi	1	Ascomycota	1	Leotiomycetes	1	Rhytismatales	1	Rhytismataceae	1	Lophodermium	1	Lophodermium sp	SH198381.06FU	1
KX908460	NC0786	ARIZ:NC0786	264	786	NCH	C1	Pinus strobus	Pinophyta	Pinaceae	LLF	Leotiomycetes (Rhytismatales)	Fungi	1	Ascomycota	1	Leotiomycetes	1	Rhytismatales	1	Rhytismataceae	1	Lophodermium	1	Lophodermium sp	SH198381.06FU	1
KX908330	NC0788	ARIZ:NC0788	272	858	NCH	C1	Kalmia latifolia	Angiospermae	Ericaceae	LLF	Sordariomycetes (Xylariales)	Fungi	1	Ascomycota	0.83	Sordariomycetes	0.83	Xylariales	0.83	Hyponectriaceae	0.83	Beltraniella	0.83	Beltraniella sp	SH222079.06FU	0.83
KX908496	NC0789	ARIZ:NC0789	222	889	NCH	C1	Quercus montana	Angiospermae	Fagaceae	LLF	Sordariomycetes (Xylariales)	Fungi	1	Ascomycota	1	Sordariomycetes	1	Xylariales	1	Amphisphaeriaceae	1	Pestalotiopsis	1	Pestalotiopsis microspora	SH210434.06FU	0.97
KX908461	NC0790	ARIZ:NC0790	68	890	NCH	C1	Pinus strobus	Pinophyta	Pinaceae	LLF	N/A	Fungi	1	Ascomycota	1	Leotiomycetes	1	Helotiales	1	NA	NA	NA	NA	NA	SH208258.06FU	0.86
KX908562	NC0791	ARIZ:NC0791	64	891	NCH	C1	Tsuga canadensis	Pinophyta	Pinaceae	LLF	Dothideomycetes (Dothideales)	Fungi	1	Ascomycota	1	Dothideomycetes	1	Dothideales	0.97	NA	NA	NA	NA	NA	NA	NA
KU683975	NC0792	ARIZ:NC0792	88	787	NCH	C1	Quercus montana	Angiospermae	Fagaceae	LLF	Sordariomycetes (N/A)	Fungi	1	Ascomycota	1	Sordariomycetes	1	NA	NA	NA	NA	NA	NA	NA	SH205984.06FU	1
KX908331	NC0793	ARIZ:NC0793	265	883	NCH	C1	Kalmia latifolia	Angiospermae	Ericaceae	LLF	Dothideomycetes (N/A)	Fungi	1	Ascomycota	1	Dothideomycetes	1	NA	NA	NA	NA	NA	NA	NA	SH216152.06FU	1
KX908497	NC0794	ARIZ:NC0794	288	888	NCH	C1	Quercus montana	Angiospermae	Fagaceae	LLF	Sordariomycetes (Diaporthales)	Fungi	1	Ascomycota	1	Sordariomycetes	1	Diaporthales	1	NA	NA	NA	NA	NA	SH210877.06FU	1
KX908332	NC0795	ARIZ:NC0795	19	148	NCH	C1	Kalmia latifolia	Angiospermae	Ericaceae	LLF	Leotiomycetes (N/A)	Fungi	1	Ascomycota	1	Leotiomycetes	0.98	Helotiales	1	Dermateaceae	1	NA	NA	NA	SH216812.06FU	1
KX908563	NC0796	ARIZ:NC0796	64	891	NCH	C1	Tsuga canadensis	Pinophyta	Pinaceae	LLF	Dothideomycetes (Dothideales)	Fungi	1	Ascomycota	1	Dothideomycetes	1	Dothideales	0.93	NA	NA	NA	NA	NA	NA	NA
KX908462	NC0797	ARIZ:NC0797	275	865	NCH	C1	Pinus strobus	Pinophyta	Pinaceae	LLF	Leotiomycetes (Helotiales)	Fungi	1	Ascomycota	0.99	Leotiomycetes	0.99	Helotiales	0.99	Helotiales unidentified	0.99	Helotiales unidentified 1	0.99	NA	NA	NA
KX908564	NC0798	ARIZ:NC0798	64	892	NCH	C1	Tsuga canadensis	Pinophyta	Pinaceae	LLF	Dothideomycetes (N/A)	Fungi	1	Ascomycota	1	Dothideomycetes	1	Incertae sedis 8	0.99	Incertae sedis 19	0.99	Scleroconidioma	0.99	Scleroconidioma sphagnicola	SH231448.06FU	0.99
KX908333	NC0799	ARIZ:NC0799	272	858	NCH	C1	Kalmia latifolia	Angiospermae	Ericaceae	LLF	N/A	Fungi	1	Ascomycota	0.72	Sordariomycetes	0.83	Xylariales	0.83	Hyponectriaceae	0.83	Beltraniella	0.83	Beltraniella sp	SH222079.06FU	0.83
KX908498	NC0800	ARIZ:NC0800	48	893	NCH	C1	Quercus montana	Angiospermae	Fagaceae	LLF	Sordariomycetes (Diaporthales)	Fungi	1	Ascomycota	1	Sordariomycetes	1	Diaporthales	1	Valsaceae	1	NA	NA	NA	NA	NA
KX908565	NC0801	ARIZ:NC0801	273	861	NCH	C1	Tsuga canadensis	Pinophyta	Pinaceae	LLF	Eurotiomycetes (Eurotiales)	Fungi	1	Ascomycota	1	Eurotiomycetes	1	Eurotiales	1	Trichocomaceae	1	Penicillium	1	Penicillium penicillioides	SH230915.06FU	1
KX908334	NC0802	ARIZ:NC0802	272	858	NCH	C1	Kalmia latifolia	Angiospermae	Ericaceae	LLF	N/A	Fungi	1	Ascomycota	0.71	Sordariomycetes	0.83	Xylariales	0.83	Hyponectriaceae	0.83	Beltraniella	0.83	Beltraniella sp	SH222079.06FU	0.83
KX908463	NC0803	ARIZ:NC0803	275	865	NCH	C1	Pinus strobus	Pinophyta	Pinaceae	LLF	Leotiomycetes (Helotiales)	Fungi	1	Ascomycota	0.98	Leotiomycetes	0.98	Helotiales	0.98	Helotiales unidentified	0.98	Helotiales unidentified 1	0.98	NA	NA	NA
KX908566	NC0804	ARIZ:NC0804	68	877	NCH	C1	Tsuga canadensis	Pinophyta	Pinaceae	LLF	N/A	Fungi	1	Ascomycota	1	Leotiomycetes	1	Helotiales	1	NA	NA	NA	NA	NA	SH208258.06FU	0.91
KX908335	NC0805	ARIZ:NC0805	272	858	NCH	C1	Kalmia latifolia	Angiospermae	Ericaceae	LLF	N/A	Fungi	1	Ascomycota	0.72	Sordariomycetes	0.83	Xylariales	0.83	Hyponectriaceae	0.83	Beltraniella	0.83	Beltraniella sp	SH222079.06FU	0.83
KX908567	NC0806	ARIZ:NC0806	19	148	NCH	C1	Tsuga canadensis	Pinophyta	Pinaceae	LLF	Leotiomycetes (N/A)	Fungi	1	Ascomycota	1	Leotiomycetes	0.92	Helotiales	1	Dermateaceae	1	NA	NA	NA	SH216812.06FU	1
KX908336	NC0808	ARIZ:NC0808	272	858	NCH	C1	Kalmia latifolia	Angiospermae	Ericaceae	LLF	N/A	Fungi	1	Ascomycota	0.71	Sordariomycetes	0.83	Xylariales	0.83	Hyponectriaceae	0.83	Beltraniella	0.83	Beltraniella sp	SH222079.06FU	0.83
KX908464	NC0809	ARIZ:NC0809	264	786	NCH	C1	Pinus strobus	Pinophyta	Pinaceae	LLF	Leotiomycetes (Rhytismatales)	Fungi	1	Ascomycota	1	Leotiomycetes	1	Rhytismatales	1	Rhytismataceae	1	Lophodermium	1	Lophodermium sp	SH198381.06FU	1
KX908568	NC0810	ARIZ:NC0810	59	264	NCH	C1	Tsuga canadensis	Pinophyta	Pinaceae	LLF	Dothideomycetes (N/A)	Fungi	1	Ascomycota	1	Dothideomycetes	1	Incertae sedis 8	0.99	Incertae sedis 19	0.99	Scleroconidioma	0.99	Scleroconidioma sphagnicola	SH231448.06FU	0.99
KX908569	NC0811	ARIZ:NC0811	59	264	NCH	C1	Tsuga canadensis	Pinophyta	Pinaceae	LLF	Dothideomycetes (N/A)	Fungi	1	Ascomycota	1	Dothideomycetes	1	Incertae sedis 8	0.99	Incertae sedis 19	0.99	Scleroconidioma	0.99	Scleroconidioma sphagnicola	SH231448.06FU	0.99
KX908337	NC0815	ARIZ:NC0815	272	858	NCH	C1	Kalmia latifolia	Angiospermae	Ericaceae	LLF	N/A	Fungi	1	Ascomycota	0.71	Sordariomycetes	0.83	Xylariales	0.83	Hyponectriaceae	0.83	Beltraniella	0.83	Beltraniella sp	SH222079.06FU	0.83
KX908570	NC0816	ARIZ:NC0816	273	861	NCH	C1	Tsuga canadensis	Pinophyta	Pinaceae	LLF	Eurotiomycetes (Eurotiales)	Fungi	1	Ascomycota	1	Eurotiomycetes	1	Eurotiales	1	Trichocomaceae	1	Penicillium	1	Penicillium penicillioides	SH230915.06FU	1
KX908465	NC0817	ARIZ:NC0817	82	442	NCH	C1	Pinus strobus	Pinophyta	Pinaceae	LLF	Dothideomycetes (Pleosporales)	Fungi	1	Ascomycota	1	Dothideomycetes	1	Pleosporales	1	NA	NA	NA	NA	NA	SH230642.06FU	1
KX908466	NC0820	ARIZ:NC0820	264	894	NCH	C1	Pinus strobus	Pinophyta	Pinaceae	LLF	Leotiomycetes (Rhytismatales)	Fungi	1	Ascomycota	1	Leotiomycetes	1	Rhytismatales	1	Rhytismataceae	1	Lophodermium	1	Lophodermium sp	SH198381.06FU	1
KX908338	NC0821	ARIZ:NC0821	265	895	NCH	C1	Kalmia latifolia	Angiospermae	Ericaceae	LLF	Dothideomycetes (N/A)	Fungi	1	Ascomycota	1	Dothideomycetes	1	NA	NA	NA	NA	NA	NA	NA	SH216152.06FU	1
KX908339	NC0822	ARIZ:NC0822	289	896	NCH	C1	Kalmia latifolia	Angiospermae	Ericaceae	LLF	Dothideomycetes (Capnodiales)	Fungi	1	Ascomycota	1	Dothideomycetes	0.94	Capnodiales	0.84	NA	NA	NA	NA	NA	NA	NA
KX908467	NC0823	ARIZ:NC0823	285	882	NCH	C1	Pinus strobus	Pinophyta	Pinaceae	LLF	N/A	Fungi	1	NA	NA	NA	NA	NA	NA	NA	NA	NA	NA	NA	SH225946.06FU	0.95
KX908468	NC0824	ARIZ:NC0824	276	866	NCH	C1	Pinus strobus	Pinophyta	Pinaceae	LLF	N/A	Fungi	1	Ascomycota	1	Incertae sedis 14	1	Incertae sedis 15	1	Incertae sedis 16	1	Ochroconis	1	Ochroconis calidifluminalis	SH241393.06FU	1
KX908469	NC0825	ARIZ:NC0825	193	897	NCH	C1	Pinus strobus	Pinophyta	Pinaceae	LLF	Dothideomycetes (Pleosporales)	Fungi	1	Ascomycota	1	Dothideomycetes	1	Pleosporales	0.99	Lophiostomataceae	0.99	Lophiostoma	0.99	Lophiostoma sp OUCMBI101098	SH195482.06FU	0.93
KX908571	NC0826	ARIZ:NC0826	225	898	NCH	C1	Tsuga canadensis	Pinophyta	Pinaceae	LLF	Eurotiomycetes (Chaetothyriales)	Fungi	1	Ascomycota	0.94	Eurotiomycetes	0.93	Chaetothyriales	0.93	Herpotrichiellaceae	0.93	NA	NA	NA	NA	NA
KX908572	NC0827	ARIZ:NC0827	64	892	NCH	C1	Tsuga canadensis	Pinophyta	Pinaceae	LLF	Dothideomycetes (N/A)	Fungi	1	Ascomycota	1	Dothideomycetes	1	Incertae sedis 8	0.99	Incertae sedis 19	0.99	Scleroconidioma	0.99	Scleroconidioma sphagnicola	SH231448.06FU	0.99
KX908573	NC0829	ARIZ:NC0829	80	218	NCH	C1	Tsuga canadensis	Pinophyta	Pinaceae	LLF	Dothideomycetes (N/A)	Fungi	1	Ascomycota	1	Dothideomycetes	1	Pleosporales	1	Venturiaceae 1	1	Rhizosphaera	1	Rhizosphaera oudemansii	SH231449.06FU	1
KX908574	NC0830	ARIZ:NC0830	273	861	NCH	C1	Tsuga canadensis	Pinophyta	Pinaceae	LLF	Eurotiomycetes (Eurotiales)	Fungi	1	Ascomycota	1	Eurotiomycetes	1	Eurotiales	1	Trichocomaceae	1	Penicillium	1	Penicillium penicillioides	SH230915.06FU	1
KX908470	NC0831	ARIZ:NC0831	264	786	NCH	C1	Pinus strobus	Pinophyta	Pinaceae	LLF	Leotiomycetes (Rhytismatales)	Fungi	1	Ascomycota	1	Leotiomycetes	1	Rhytismatales	1	Rhytismataceae	1	Lophodermium	1	Lophodermium sp	SH198381.06FU	1
KX908340	NC0832	ARIZ:NC0832	265	791	NCH	C1	Kalmia latifolia	Angiospermae	Ericaceae	LLF	Dothideomycetes (N/A)	Fungi	1	Ascomycota	1	Dothideomycetes	1	NA	NA	NA	NA	NA	NA	NA	SH216152.06FU	1
KX908575	NC0833	ARIZ:NC0833	18	596	NCH	C1	Tsuga canadensis	Pinophyta	Pinaceae	LLF	Sordariomycetes (Coniochaetales)	Fungi	1	Ascomycota	1	Sordariomycetes	1	Coniochaetales	0.97	Coniochaetaceae	0.97	Lecythophora	0.97	Lecythophora hoffmannii	SH226439.06FU	0.97
KX908341	NC0834	ARIZ:NC0834	272	858	NCH	C1	Kalmia latifolia	Angiospermae	Ericaceae	LLF	N/A	Fungi	1	Ascomycota	0.68	Sordariomycetes	0.83	Xylariales	0.83	Hyponectriaceae	0.83	Beltraniella	0.83	Beltraniella sp	SH222079.06FU	0.83
KX908342	NC0836	ARIZ:NC0836	286	886	NCH	C1	Kalmia latifolia	Angiospermae	Ericaceae	LLF	Dothideomycetes (Capnodiales)	Fungi	1	Ascomycota	0.97	Dothideomycetes	0.97	Capnodiales	0.96	NA	NA	NA	NA	NA	NA	NA
KX908576	NC0838	ARIZ:NC0838	225	898	NCH	C1	Tsuga canadensis	Pinophyta	Pinaceae	LLF	Eurotiomycetes (Chaetothyriales)	Fungi	1	Ascomycota	0.97	Eurotiomycetes	0.94	Chaetothyriales	0.94	Herpotrichiellaceae	0.92	Phaeomoniella	0.88	NA	NA	NA
KX908471	NC0839	ARIZ:NC0839	264	800	NCH	C1	Pinus strobus	Pinophyta	Pinaceae	LLF	Leotiomycetes (Rhytismatales)	Fungi	1	Ascomycota	1	Leotiomycetes	1	Rhytismatales	1	Rhytismataceae	1	Lophodermium	1	Lophodermium sp	SH198381.06FU	1
KX908343	NC0840	ARIZ:NC0840	272	858	NCH	C1	Kalmia latifolia	Angiospermae	Ericaceae	LLF	N/A	Fungi	1	Ascomycota	0.72	Sordariomycetes	0.83	Xylariales	0.83	Hyponectriaceae	0.83	Beltraniella	0.83	Beltraniella sp	SH222079.06FU	0.83
KU683976	NC0844	ARIZ:NC0844	108	881	NCH	C1	Quercus montana	Angiospermae	Fagaceae	LLF	Sordariomycetes (Hypocreales)	Fungi	1	Ascomycota	1	Sordariomycetes	0.92	Hypocreales	0.92	Nectriaceae	0.92	Cylindrium	0.92	Cylindrium sp	SH189862.06FU	0.92
KX908344	NC0845	ARIZ:NC0845	265	899	NCH	C1	Kalmia latifolia	Angiospermae	Ericaceae	LLF	Dothideomycetes (N/A)	Fungi	1	Ascomycota	1	Dothideomycetes	1	NA	NA	NA	NA	NA	NA	NA	SH216152.06FU	1
KX908345	NC0846	ARIZ:NC0846	265	883	NCH	C1	Kalmia latifolia	Angiospermae	Ericaceae	LLF	Dothideomycetes (N/A)	Fungi	1	Ascomycota	1	Dothideomycetes	1	NA	NA	NA	NA	NA	NA	NA	SH216152.06FU	1
KX908346	NC0848	ARIZ:NC0848	272	858	NCH	C1	Kalmia latifolia	Angiospermae	Ericaceae	LLF	N/A	Fungi	1	Ascomycota	0.72	Sordariomycetes	0.83	Xylariales	0.83	Hyponectriaceae	0.83	Beltraniella	0.83	Beltraniella sp	SH222079.06FU	0.83
KX908373	NC0849	ARIZ:NC0849	64	891	NCH	C1	Tsuga canadensis	Pinophyta	Pinaceae	LLF	Dothideomycetes (N/A)	Fungi	1	Ascomycota	1	Dothideomycetes	1	NA	NA	NA	NA	NA	NA	NA	NA	NA
KX908374	NC0850	ARIZ:NC0850	264	785	NCH	C1	Pinus strobus	Pinophyta	Pinaceae	LLF	Leotiomycetes (Rhytismatales)	Fungi	1	Ascomycota	1	Leotiomycetes	1	Rhytismatales	1	Rhytismataceae	1	Lophodermium	1	Lophodermium sp	SH198381.06FU	1
KX908472	NC0851	ARIZ:NC0851	82	442	NCH	C1	Pinus strobus	Pinophyta	Pinaceae	LLF	Dothideomycetes (Pleosporales)	Fungi	1	Ascomycota	1	Dothideomycetes	1	Pleosporales	1	NA	NA	NA	NA	NA	SH230642.06FU	1
KU683977	NC0852	ARIZ:NC0852	262	782	NCH	C1	Quercus montana	Angiospermae	Fagaceae	LLF	Sordariomycetes (Xylariales)	Fungi	1	Ascomycota	1	Sordariomycetes	1	Xylariales	1	Xylariaceae	1	NA	NA	NA	SH193307.06FU	1
KX908577	NC0853	ARIZ:NC0853	238	868	NCH	C1	Tsuga canadensis	Pinophyta	Pinaceae	LLF	Sordariomycetes (Hypocreales)	Fungi	1	Ascomycota	1	Sordariomycetes	1	Hypocreales	1	Nectriaceae	1	Fusarium	0.82	NA	NA	NA
KX908347	NC0854	ARIZ:NC0854	265	791	NCH	C1	Kalmia latifolia	Angiospermae	Ericaceae	LLF	Dothideomycetes (N/A)	Fungi	1	Ascomycota	1	Dothideomycetes	1	NA	NA	NA	NA	NA	NA	NA	SH216152.06FU	1
KX908473	NC0855	ARIZ:NC0855	264	795	NCH	C1	Pinus strobus	Pinophyta	Pinaceae	LLF	Leotiomycetes (Rhytismatales)	Fungi	1	Ascomycota	1	Leotiomycetes	1	Rhytismatales	1	Rhytismataceae	1	Lophodermium	1	Lophodermium sp	SH198381.06FU	1
KU683978	NC0856	ARIZ:NC0856	108	881	NCH	C1	Quercus montana	Angiospermae	Fagaceae	LLF	Sordariomycetes (Hypocreales)	Fungi	1	Ascomycota	1	Sordariomycetes	0.87	Hypocreales	0.87	Nectriaceae	0.87	Cylindrium	0.87	Cylindrium sp	SH189862.06FU	0.87
KX908578	NC0857	ARIZ:NC0857	273	861	NCH	C1	Tsuga canadensis	Pinophyta	Pinaceae	LLF	Eurotiomycetes (Eurotiales)	Fungi	1	Ascomycota	1	Eurotiomycetes	1	Eurotiales	1	Trichocomaceae	1	Penicillium	1	Penicillium penicillioides	SH230915.06FU	1
KX908579	NC0858	ARIZ:NC0858	59	264	NCH	C1	Tsuga canadensis	Pinophyta	Pinaceae	LLF	Dothideomycetes (N/A)	Fungi	1	Ascomycota	1	Dothideomycetes	1	Incertae sedis 8	0.99	Incertae sedis 19	0.99	Scleroconidioma	0.99	Scleroconidioma sphagnicola	SH231448.06FU	0.99
KX908348	NC0860	ARIZ:NC0860	290	900	NCH	C1	Kalmia latifolia	Angiospermae	Ericaceae	LLF	Dothideomycetes (N/A)	Fungi	1	Ascomycota	1	Dothideomycetes	1	NA	NA	NA	NA	NA	NA	NA	SH198135.06FU	1
KX908349	NC0861	ARIZ:NC0861	53	870	NCH	C1	Kalmia latifolia	Angiospermae	Ericaceae	LLF	Leotiomycetes (Helotiales)	Fungi	1	Ascomycota	1	Leotiomycetes	1	Helotiales	1	NA	NA	NA	NA	NA	SH209354.06FU	1
KX908580	NC0862	ARIZ:NC0862	59	264	NCH	C1	Tsuga canadensis	Pinophyta	Pinaceae	LLF	Dothideomycetes (N/A)	Fungi	1	Ascomycota	1	Dothideomycetes	1	Incertae sedis 8	0.97	Incertae sedis 19	0.97	Scleroconidioma	0.97	Scleroconidioma sphagnicola	SH231448.06FU	0.97
KU683979	NC0863	ARIZ:NC0863	108	881	NCH	C1	Quercus montana	Angiospermae	Fagaceae	LLF	Sordariomycetes (Hypocreales)	Fungi	1	Ascomycota	1	Sordariomycetes	0.87	Hypocreales	0.87	Nectriaceae	0.87	Cylindrium	0.87	Cylindrium sp	SH189862.06FU	0.87
KX908474	NC0864	ARIZ:NC0864	264	795	NCH	C1	Pinus strobus	Pinophyta	Pinaceae	LLF	Leotiomycetes (Rhytismatales)	Fungi	1	Ascomycota	1	Leotiomycetes	1	Rhytismatales	1	Rhytismataceae	1	Lophodermium	1	Lophodermium sp	SH198381.06FU	1
KX908581	NC0865	ARIZ:NC0865	59	264	NCH	C1	Tsuga canadensis	Pinophyta	Pinaceae	LLF	Dothideomycetes (N/A)	Fungi	1	Ascomycota	1	Dothideomycetes	1	Incertae sedis 8	1	Incertae sedis 19	1	Scleroconidioma	1	Scleroconidioma sphagnicola	SH231448.06FU	1
KX908582	NC0867	ARIZ:NC0867	59	264	NCH	C1	Tsuga canadensis	Pinophyta	Pinaceae	LLF	Dothideomycetes (N/A)	Fungi	1	Ascomycota	1	Dothideomycetes	1	Incertae sedis 8	0.99	Incertae sedis 19	0.99	Scleroconidioma	0.99	Scleroconidioma sphagnicola	SH231448.06FU	0.99
KX908350	NC0868	ARIZ:NC0868	28	901	NCH	C3	Kalmia latifolia	Angiospermae	Ericaceae	LLF	N/A	Fungi	1	Ascomycota	1	NA	NA	NA	NA	NA	NA	NA	NA	NA	SH234480.06FU	1
KX908583	NC0869	ARIZ:NC0869	53	870	NCH	C3	Tsuga canadensis	Pinophyta	Pinaceae	LLF	Leotiomycetes (Helotiales)	Fungi	1	Ascomycota	1	Leotiomycetes	1	Helotiales	1	NA	NA	NA	NA	NA	SH209354.06FU	1
KX908351	NC0870	ARIZ:NC0870	290	900	NCH	C3	Kalmia latifolia	Angiospermae	Ericaceae	LLF	Dothideomycetes (N/A)	Fungi	1	Ascomycota	1	Dothideomycetes	1	NA	NA	NA	NA	NA	NA	NA	SH198135.06FU	1
KX908499	NC0871	ARIZ:NC0871	59	264	NCH	C3	Quercus montana	Angiospermae	Fagaceae	LLF	Dothideomycetes (N/A)	Fungi	1	Ascomycota	1	Dothideomycetes	1	Incertae sedis 8	0.99	Incertae sedis 19	0.99	Scleroconidioma	0.99	Scleroconidioma sphagnicola	SH231448.06FU	0.99
KX908584	NC0872	ARIZ:NC0872	53	870	NCH	C3	Tsuga canadensis	Pinophyta	Pinaceae	LLF	Leotiomycetes (Helotiales)	Fungi	1	Ascomycota	1	Leotiomycetes	1	Helotiales	1	NA	NA	NA	NA	NA	SH209354.06FU	1
KX908352	NC0873	ARIZ:NC0873	290	900	NCH	C3	Kalmia latifolia	Angiospermae	Ericaceae	LLF	Dothideomycetes (N/A)	Fungi	1	Ascomycota	1	Dothideomycetes	1	NA	NA	NA	NA	NA	NA	NA	SH198135.06FU	1
KX908353	NC0874	ARIZ:NC0874	64	892	NCH	C3	Kalmia latifolia	Angiospermae	Ericaceae	LLF	Dothideomycetes (N/A)	Fungi	1	Ascomycota	1	Dothideomycetes	1	NA	NA	NA	NA	NA	NA	NA	NA	NA
KX908354	NC0875	ARIZ:NC0875	59	264	NCH	C3	Kalmia latifolia	Angiospermae	Ericaceae	LLF	Dothideomycetes (N/A)	Fungi	1	Ascomycota	1	Dothideomycetes	1	Incertae sedis 8	0.97	Incertae sedis 19	0.97	Scleroconidioma	0.97	Scleroconidioma sphagnicola	SH231448.06FU	0.97
KX908355	NC0876	ARIZ:NC0876	29	46	NCH	C3	Kalmia latifolia	Angiospermae	Ericaceae	LLF	Dothideomycetes (Pleosporales)	Fungi	1	Ascomycota	1	Dothideomycetes	1	Pleosporales	1	Pleosporaceae	1	Alternaria	1	Alternaria sp 3 MU 2012	SH224849.06FU	0.89
KX908585	NC0877	ARIZ:NC0877	274	863	NCH	C3	Tsuga canadensis	Pinophyta	Pinaceae	LLF	N/A	Fungi	1	Ascomycota	1	NA	NA	NA	NA	NA	NA	NA	NA	NA	SH189865.06FU	0.96
KX908586	NC0878	ARIZ:NC0878	270	832	NCH	C3	Tsuga canadensis	Pinophyta	Pinaceae	LLF	Leotiomycetes (Helotiales)	Fungi	1	Ascomycota	1	Leotiomycetes	1	Helotiales	1	NA	NA	NA	NA	NA	SH209189.06FU	1
KX908356	NC0879	ARIZ:NC0879	248	902	NCH	C3	Kalmia latifolia	Angiospermae	Ericaceae	LLF	Dothideomycetes (N/A)	Fungi	1	Ascomycota	1	Dothideomycetes	1	NA	NA	NA	NA	NA	NA	NA	SH236120.06FU	0.88
KX908587	NC0880	ARIZ:NC0880	53	870	NCH	C3	Tsuga canadensis	Pinophyta	Pinaceae	LLF	Leotiomycetes (Helotiales)	Fungi	1	Ascomycota	1	Leotiomycetes	1	Helotiales	1	NA	NA	NA	NA	NA	SH209354.06FU	1
KX908357	NC0881	ARIZ:NC0881	248	902	NCH	C3	Kalmia latifolia	Angiospermae	Ericaceae	LLF	Dothideomycetes (N/A)	Fungi	1	Ascomycota	1	Dothideomycetes	1	NA	NA	NA	NA	NA	NA	NA	SH236120.06FU	0.92
KX908588	NC0884	ARIZ:NC0884	225	898	NCH	C3	Tsuga canadensis	Pinophyta	Pinaceae	LLF	Eurotiomycetes (Chaetothyriales)	Fungi	1	Ascomycota	0.98	Eurotiomycetes	0.97	Chaetothyriales	0.97	Herpotrichiellaceae	0.96	Phaeomoniella	0.86	NA	NA	NA
KX908589	NC0885	ARIZ:NC0885	278	871	NCH	C3	Tsuga canadensis	Pinophyta	Pinaceae	LLF	Leotiomycetes (N/A)	Fungi	1	Ascomycota	1	Leotiomycetes	0.9	NA	NA	NA	NA	NA	NA	NA	NA	NA
KU683980	NC0886	ARIZ:NC0886	45	903	NCH	C3	Tsuga canadensis	Pinophyta	Pinaceae	LLF	Sordariomycetes (Xylariales)	Fungi	1	Ascomycota	1	Sordariomycetes	1	Xylariales	1	Amphisphaeriaceae	1	Adisciso	1	Adisciso kaki	SH210427.06FU	1
KX908358	NC0888	ARIZ:NC0888	59	264	NCH	C3	Kalmia latifolia	Angiospermae	Ericaceae	LLF	Dothideomycetes (N/A)	Fungi	1	Ascomycota	1	Dothideomycetes	1	Incertae sedis 8	0.99	Incertae sedis 19	0.99	Scleroconidioma	0.99	Scleroconidioma sphagnicola	SH231448.06FU	0.99
KX908590	NC0889	ARIZ:NC0889	19	148	NCH	C3	Tsuga canadensis	Pinophyta	Pinaceae	LLF	Leotiomycetes (N/A)	Fungi	1	Ascomycota	1	Leotiomycetes	0.92	Helotiales	1	Dermateaceae	1	NA	NA	NA	SH216812.06FU	1
KX908591	NC0890	ARIZ:NC0890	277	867	NCH	C3	Tsuga canadensis	Pinophyta	Pinaceae	LLF	Leotiomycetes (Helotiales)	Fungi	1	Ascomycota	1	Leotiomycetes	0.97	Helotiales	0.96	NA	NA	NA	NA	NA	NA	NA
KX908592	NC0892	ARIZ:NC0892	225	898	NCH	C3	Tsuga canadensis	Pinophyta	Pinaceae	LLF	Eurotiomycetes (Chaetothyriales)	Fungi	1	Ascomycota	0.98	Eurotiomycetes	0.97	Chaetothyriales	0.97	Herpotrichiellaceae	0.96	Phaeomoniella	0.86	NA	NA	NA
KU683981	NC0893-2	ARIZ:NC0893-2	52	904	NCH	C3	Pinus strobus	Pinophyta	Pinaceae	LLF	Sordariomycetes (Xylariales)	Fungi	1	Ascomycota	1	Sordariomycetes	1	Xylariales	1	Xylariaceae	1	Nemania	1	Nemania sp	SH241718.06FU	1
KU683982	NC0894	ARIZ:NC0894	262	782	NCH	C3	Quercus montana	Angiospermae	Fagaceae	LLF	Sordariomycetes (Xylariales)	Fungi	1	Ascomycota	1	Sordariomycetes	1	Xylariales	1	Xylariaceae	1	NA	NA	NA	SH193307.06FU	0.99
KX908359	NC0895	ARIZ:NC0895	291	905	NCH	C3	Kalmia latifolia	Angiospermae	Ericaceae	LLF	Eurotiomycetes (N/A)	Fungi	1	Ascomycota	0.98	Eurotiomycetes	0.81	Chaetothyriales	1	Herpotrichiellaceae	0.87	NA	NA	NA	NA	NA
KX908593	NC0897	ARIZ:NC0897	292	906	NCH	C3	Tsuga canadensis	Pinophyta	Pinaceae	LLF	Sordariomycetes (Hypocreales)	Fungi	1	Ascomycota	1	Sordariomycetes	1	Hypocreales	1	Bionectriaceae	1	Bionectria	0.85	Bionectria ralfsii	SH236637.06FU	0.85
KX908360	NC0899	ARIZ:NC0899	59	264	NCH	C3	Kalmia latifolia	Angiospermae	Ericaceae	LLF	Dothideomycetes (N/A)	Fungi	1	Ascomycota	1	Dothideomycetes	1	Incertae sedis 8	1	Incertae sedis 19	1	Scleroconidioma	1	Scleroconidioma sphagnicola	SH231448.06FU	1
KX908594	NC0900	ARIZ:NC0900	53	870	NCH	C3	Tsuga canadensis	Pinophyta	Pinaceae	LLF	Leotiomycetes (Helotiales)	Fungi	1	Ascomycota	1	Leotiomycetes	1	Helotiales	1	NA	NA	NA	NA	NA	SH209354.06FU	1
KX908361	NC0903	ARIZ:NC0903	190	552	NCH	C3	Kalmia latifolia	Angiospermae	Ericaceae	LLF	Dothideomycetes (Capnodiales)	Fungi	1	Ascomycota	1	Dothideomycetes	1	Capnodiales	1	Mycosphaerellaceae	1	Zasmidium	1	Zasmidium nocoxi	SH212667.06FU	1
KX908362	NC0904	ARIZ:NC0904	248	902	NCH	C3	Kalmia latifolia	Angiospermae	Ericaceae	LLF	Dothideomycetes (N/A)	Fungi	1	Ascomycota	1	Dothideomycetes	1	NA	NA	NA	NA	NA	NA	NA	SH236120.06FU	0.86
KX908595	NC0905	ARIZ:NC0905	19	148	NCH	C3	Tsuga canadensis	Pinophyta	Pinaceae	LLF	Leotiomycetes (N/A)	Fungi	1	Ascomycota	1	Leotiomycetes	0.92	Helotiales	1	Dermateaceae	1	NA	NA	NA	SH216812.06FU	1
KU683983	NC0907	ARIZ:NC0907	262	782	NCH	C3	Quercus montana	Angiospermae	Fagaceae	LLF	Sordariomycetes (Xylariales)	Fungi	1	Ascomycota	1	Sordariomycetes	1	Xylariales	1	Xylariaceae	0.99	NA	NA	NA	SH193307.06FU	0.98
KX908596	NC0908	ARIZ:NC0908	19	148	NCH	C3	Tsuga canadensis	Pinophyta	Pinaceae	LLF	Leotiomycetes (N/A)	Fungi	1	Ascomycota	1	Leotiomycetes	0.92	Helotiales	1	Dermateaceae	1	NA	NA	NA	SH216812.06FU	1
KU683984	NC0910	ARIZ:NC0910	262	782	NCH	C3	Quercus montana	Angiospermae	Fagaceae	LLF	Sordariomycetes (Xylariales)	Fungi	1	Ascomycota	1	Sordariomycetes	1	Xylariales	1	Xylariaceae	1	NA	NA	NA	SH193307.06FU	0.99
KX908363	NC0912	ARIZ:NC0912	29	46	NCH	C3	Kalmia latifolia	Angiospermae	Ericaceae	LLF	Dothideomycetes (Pleosporales)	Fungi	1	Ascomycota	1	Dothideomycetes	1	Pleosporales	1	Pleosporaceae	1	Alternaria	1	Alternaria sp 3 MU 2012	SH224849.06FU	0.89
KX908597	NC0913	ARIZ:NC0913	270	832	NCH	C3	Tsuga canadensis	Pinophyta	Pinaceae	LLF	Leotiomycetes (Helotiales)	Fungi	1	Ascomycota	1	Leotiomycetes	1	Helotiales	1	NA	NA	NA	NA	NA	SH209189.06FU	1
KX908598	NC0916	ARIZ:NC0916	53	870	NCH	C3	Tsuga canadensis	Pinophyta	Pinaceae	LLF	Leotiomycetes (Helotiales)	Fungi	1	Ascomycota	1	Leotiomycetes	1	Helotiales	1	NA	NA	NA	NA	NA	SH209354.06FU	1
KX908364	NC0917	ARIZ:NC0917	222	889	NCH	C3	Kalmia latifolia	Angiospermae	Ericaceae	LLF	Sordariomycetes (Xylariales)	Fungi	1	Ascomycota	1	Sordariomycetes	1	Xylariales	1	Amphisphaeriaceae	1	Pestalotiopsis	0.98	Pestalotiopsis microspora	SH210434.06FU	0.95
KX908365	NC0919	ARIZ:NC0919	29	46	NCH	C3	Kalmia latifolia	Angiospermae	Ericaceae	LLF	Dothideomycetes (Pleosporales)	Fungi	1	Ascomycota	1	Dothideomycetes	1	Pleosporales	1	Pleosporaceae	1	Alternaria	1	Alternaria sp 3 MU 2012	SH224849.06FU	0.92
KX908366	NC0921	ARIZ:NC0921	248	902	NCH	C3	Kalmia latifolia	Angiospermae	Ericaceae	LLF	Dothideomycetes (N/A)	Fungi	1	Ascomycota	1	Dothideomycetes	1	NA	NA	NA	NA	NA	NA	NA	SH236120.06FU	0.85
KX908599	NC0922	ARIZ:NC0922	53	870	NCH	C3	Tsuga canadensis	Pinophyta	Pinaceae	LLF	Leotiomycetes (Helotiales)	Fungi	1	Ascomycota	1	Leotiomycetes	1	Helotiales	1	NA	NA	NA	NA	NA	SH209354.06FU	1
KX908600	NC0924	ARIZ:NC0924	19	148	NCH	C3	Tsuga canadensis	Pinophyta	Pinaceae	LLF	Leotiomycetes (N/A)	Fungi	1	Ascomycota	1	Leotiomycetes	0.92	Helotiales	1	Dermateaceae	1	NA	NA	NA	SH216812.06FU	1
KX908601	NC0925	ARIZ:NC0925	273	861	NCH	C3	Tsuga canadensis	Pinophyta	Pinaceae	LLF	Eurotiomycetes (Eurotiales)	Fungi	1	Ascomycota	1	Eurotiomycetes	1	Eurotiales	1	Trichocomaceae	1	Penicillium	1	Penicillium penicillioides	SH230915.06FU	1
KX908602	NC0928	ARIZ:NC0928	278	871	NCH	C3	Tsuga canadensis	Pinophyta	Pinaceae	LLF	N/A	Fungi	1	Ascomycota	1	Leotiomycetes	0.9	NA	NA	NA	NA	NA	NA	NA	NA	NA
KX908367	NC0930	ARIZ:NC0930	225	898	NCH	C3	Kalmia latifolia	Angiospermae	Ericaceae	LLF	Eurotiomycetes (Chaetothyriales)	Fungi	1	Ascomycota	0.97	Eurotiomycetes	0.95	Chaetothyriales	0.95	Herpotrichiellaceae	0.93	Phaeomoniella	0.9	Phaeomoniella effusa	SH235846.06FU	0.81
KX908603	NC0931	ARIZ:NC0931	41	67	NCH	C3	Tsuga canadensis	Pinophyta	Pinaceae	LLF	Dothideomycetes (Dothideales)	Fungi	1	Ascomycota	1	Dothideomycetes	1	Dothideales	0.9	Dothioraceae	0.88	NA	NA	NA	SH231446.06FU	0.88
KX908500	NC0932	ARIZ:NC0932	59	264	NCH	C3	Quercus montana	Angiospermae	Fagaceae	LLF	Dothideomycetes (N/A)	Fungi	1	Ascomycota	1	Dothideomycetes	1	Incertae sedis 8	1	Incertae sedis 19	1	Scleroconidioma	1	Scleroconidioma sphagnicola	SH231448.06FU	1
KU683985	NC0935	ARIZ:NC0935	91	318	NCH	C3	Tsuga canadensis	Pinophyta	Pinaceae	LLF	Sordariomycetes (N/A)	Fungi	1	Ascomycota	1	Sordariomycetes	1	NA	NA	NA	NA	NA	NA	NA	SH227121.06FU	1
KX908604	NC0936	ARIZ:NC0936	293	907	NCH	C3	Tsuga canadensis	Pinophyta	Pinaceae	LLF	Leotiomycetes (Helotiales)	Fungi	1	Ascomycota	1	Leotiomycetes	1	Helotiales	1	NA	NA	NA	NA	NA	NA	NA
KX908605	NC0938	ARIZ:NC0938	53	870	NCH	C3	Tsuga canadensis	Pinophyta	Pinaceae	LLF	Leotiomycetes (Helotiales)	Fungi	1	Ascomycota	1	Leotiomycetes	1	Helotiales	1	NA	NA	NA	NA	NA	SH209354.06FU	1
KX908368	NC0939	ARIZ:NC0939	248	902	NCH	C3	Kalmia latifolia	Angiospermae	Ericaceae	LLF	Dothideomycetes (N/A)	Fungi	1	Ascomycota	1	Dothideomycetes	1	NA	NA	NA	NA	NA	NA	NA	SH236120.06FU	0.81
KU683986	NC0940	ARIZ:NC0940	262	782	NCH	C3	Kalmia latifolia	Angiospermae	Ericaceae	LLF	Sordariomycetes (Xylariales)	Fungi	1	Ascomycota	1	Sordariomycetes	1	Xylariales	1	Xylariaceae	1	NA	NA	NA	SH193307.06FU	0.99
KX908606	NC0943	ARIZ:NC0943	288	888	NCH	C3	Tsuga canadensis	Pinophyta	Pinaceae	LLF	Sordariomycetes (Diaporthales)	Fungi	1	Ascomycota	1	Sordariomycetes	1	Diaporthales	1	NA	NA	NA	NA	NA	SH210877.06FU	1
KU683987	NC0944	ARIZ:NC0944	262	782	NCH	C3	Quercus montana	Angiospermae	Fagaceae	LLF	Sordariomycetes (Xylariales)	Fungi	1	Ascomycota	1	Sordariomycetes	1	Xylariales	1	Xylariaceae	1	NA	NA	NA	SH193307.06FU	0.99
KX908607	NC0945	ARIZ:NC0945	19	148	NCH	C3	Tsuga canadensis	Pinophyta	Pinaceae	LLF	Leotiomycetes (N/A)	Fungi	1	Ascomycota	1	Leotiomycetes	0.83	Helotiales	1	Dermateaceae	1	NA	NA	NA	SH216812.06FU	1
KX908475	NC0946	ARIZ:NC0946	203	908	NCH	C3	Pinus strobus	Pinophyta	Pinaceae	LLF	Dothideomycetes (Capnodiales)	Fungi	1	Ascomycota	1	Dothideomycetes	1	Capnodiales	1	Teratosphaeriaceae	1	Devriesia	1	Devriesia sp	SH238939.06FU	1
KX908608	NC0947	ARIZ:NC0947	53	870	NCH	C3	Tsuga canadensis	Pinophyta	Pinaceae	LLF	Leotiomycetes (Helotiales)	Fungi	1	Ascomycota	0.99	Leotiomycetes	0.99	Helotiales	0.99	NA	NA	NA	NA	NA	SH209354.06FU	0.99
KX908609	NC0949	ARIZ:NC0949	53	870	NCH	C3	Tsuga canadensis	Pinophyta	Pinaceae	LLF	Leotiomycetes (Helotiales)	Fungi	1	Ascomycota	1	Leotiomycetes	1	Helotiales	1	NA	NA	NA	NA	NA	SH209354.06FU	1
KU683988	NC0951	ARIZ:NC0951	45	903	NCH	C3	Tsuga canadensis	Pinophyta	Pinaceae	LLF	Sordariomycetes (Xylariales)	Fungi	1	Ascomycota	1	Sordariomycetes	1	Xylariales	1	Amphisphaeriaceae	1	Adisciso	1	Adisciso kaki	SH210427.06FU	1
KU683989	NC0952	ARIZ:NC0952	262	782	NCH	C3	Tsuga canadensis	Pinophyta	Pinaceae	LLF	Sordariomycetes (Xylariales)	Fungi	1	Ascomycota	1	Sordariomycetes	1	Xylariales	1	Xylariaceae	1	NA	NA	NA	SH193307.06FU	0.97
JQ761622	NC0967	ARIZ:NC0967	290	900	NCH	C3	Kalmia latifolia	Angiospermae	Ericaceae	Endophyte	Dothideomycetes (N/A)	Fungi	1	Ascomycota	1	Dothideomycetes	1	NA	NA	NA	NA	NA	NA	NA	SH198135.06FU	1
JQ761633	NC0983	ARIZ:NC0983	265	791	NCH	C3	Kalmia latifolia	Angiospermae	Ericaceae	Endophyte	Dothideomycetes (N/A)	Fungi	1	Ascomycota	1	Dothideomycetes	1	NA	NA	NA	NA	NA	NA	NA	SH216152.06FU	1
JQ761639	NC0989	ARIZ:NC0989	265	791	NCH	C3	Kalmia latifolia	Angiospermae	Ericaceae	Endophyte	Dothideomycetes (N/A)	Fungi	1	Ascomycota	1	Dothideomycetes	1	NA	NA	NA	NA	NA	NA	NA	SH216152.06FU	1
JQ761650	NC1002	ARIZ:NC1002	107	290	NCH	C3	Tsuga canadensis	Pinophyta	Pinaceae	Endophyte	Sordariomycetes (N/A)	Fungi	1	Ascomycota	1	Sordariomycetes	1	Xylariales	1	Xylariaceae	1	Xylaria	1	Xylaria sp	SH197605.06FU	1
JQ761661	NC1013	ARIZ:NC1013	265	791	NCH	C3	Kalmia latifolia	Angiospermae	Ericaceae	Endophyte	Dothideomycetes (N/A)	Fungi	1	Ascomycota	1	Dothideomycetes	1	NA	NA	NA	NA	NA	NA	NA	SH216152.06FU	1
JQ761665	NC1017	ARIZ:NC1017	265	791	NCH	C3	Kalmia latifolia	Angiospermae	Ericaceae	Endophyte	Dothideomycetes (N/A)	Fungi	1	Ascomycota	1	Dothideomycetes	1	NA	NA	NA	NA	NA	NA	NA	SH216152.06FU	1
JQ761666	NC1018	ARIZ:NC1018	265	791	NCH	C3	Kalmia latifolia	Angiospermae	Ericaceae	Endophyte	Dothideomycetes (N/A)	Fungi	1	Ascomycota	1	Dothideomycetes	1	NA	NA	NA	NA	NA	NA	NA	SH216152.06FU	1
JQ761667	NC1019	ARIZ:NC1019	265	791	NCH	C3	Kalmia latifolia	Angiospermae	Ericaceae	Endophyte	Dothideomycetes (N/A)	Fungi	1	Ascomycota	1	Dothideomycetes	1	NA	NA	NA	NA	NA	NA	NA	SH216152.06FU	1
JQ761674	NC1026	ARIZ:NC1026	294	917	NCH	C3	Kalmia latifolia	Angiospermae	Ericaceae	Endophyte	Dothideomycetes (N/A)	Fungi	1	Ascomycota	1	Dothideomycetes	0.98	NA	NA	NA	NA	NA	NA	NA	NA	NA
JQ761692	NC1045	ARIZ:NC1045	29	46	NCH	C3	Kalmia latifolia	Angiospermae	Ericaceae	Endophyte	Dothideomycetes (Pleosporales)	Fungi	1	Ascomycota	1	Dothideomycetes	1	Pleosporales	1	Pleosporaceae	1	Alternaria	1	Alternaria sp 3 MU 2012	SH224849.06FU	0.92
JQ761694	NC1047	ARIZ:NC1047	29	46	NCH	C3	Kalmia latifolia	Angiospermae	Ericaceae	Endophyte	Dothideomycetes (Pleosporales)	Fungi	1	Ascomycota	1	Dothideomycetes	1	Pleosporales	1	Pleosporaceae	1	Alternaria	1	Alternaria sp 3 MU 2012	SH224849.06FU	0.9
JQ761702	NC1056	ARIZ:NC1056	127	765	NCH	C3	Kalmia latifolia	Angiospermae	Ericaceae	Endophyte	Dothideomycetes (Pleosporales)	Fungi	1	Ascomycota	1	Dothideomycetes	1	Pleosporales	1	NA	NA	NA	NA	NA	SH197544.06FU	0.96
JQ761710	NC1064	ARIZ:NC1064	107	715	NCH	C3	Tsuga canadensis	Pinophyta	Pinaceae	Endophyte	Sordariomycetes (N/A)	Fungi	1	Ascomycota	1	Sordariomycetes	1	Xylariales	1	Xylariaceae	1	Xylaria	1	Xylaria sp	SH197605.06FU	1
JQ761711	NC1065	ARIZ:NC1065	265	791	NCH	C3	Kalmia latifolia	Angiospermae	Ericaceae	Endophyte	Dothideomycetes (N/A)	Fungi	1	Ascomycota	1	Dothideomycetes	1	NA	NA	NA	NA	NA	NA	NA	SH216152.06FU	1
JQ761718	NC1072	ARIZ:NC1072	107	715	NCH	C3	Tsuga canadensis	Pinophyta	Pinaceae	Endophyte	Sordariomycetes (N/A)	Fungi	1	Ascomycota	1	Sordariomycetes	1	Xylariales	1	Xylariaceae	1	Xylaria	1	Xylaria sp	SH197605.06FU	1
JQ761727	NC1081	ARIZ:NC1081	107	924	NCH	C3	Tsuga canadensis	Pinophyta	Pinaceae	Endophyte	Sordariomycetes (N/A)	Fungi	1	Ascomycota	1	Sordariomycetes	1	Xylariales	1	Xylariaceae	1	Xylaria	1	Xylaria sp	SH197605.06FU	1
JQ761734	NC1088	ARIZ:NC1088	107	477	NCH	C3	Tsuga canadensis	Pinophyta	Pinaceae	Endophyte	Sordariomycetes (N/A)	Fungi	1	Ascomycota	1	Sordariomycetes	1	Xylariales	1	Xylariaceae	1	Xylaria	1	Xylaria sp	SH197605.06FU	1
JQ761749	NC1103	ARIZ:NC1103	107	477	NCH	C3	Tsuga canadensis	Pinophyta	Pinaceae	Endophyte	Sordariomycetes (N/A)	Fungi	1	Ascomycota	1	Sordariomycetes	1	Xylariales	1	Xylariaceae	1	Xylaria	1	Xylaria sp	SH197605.06FU	1
JQ761754	NC1108	ARIZ:NC1108	107	290	NCH	C3	Tsuga canadensis	Pinophyta	Pinaceae	Endophyte	Sordariomycetes (N/A)	Fungi	1	Ascomycota	1	Sordariomycetes	1	Xylariales	1	Xylariaceae	1	Xylaria	1	Xylaria sp	SH197605.06FU	1
JQ761758	NC1112	ARIZ:NC1112	265	791	NCH	C3	Kalmia latifolia	Angiospermae	Ericaceae	Endophyte	Dothideomycetes (N/A)	Fungi	1	Ascomycota	1	Dothideomycetes	1	NA	NA	NA	NA	NA	NA	NA	SH216152.06FU	1
JQ761761	NC1115	ARIZ:NC1115	265	883	NCH	C3	Kalmia latifolia	Angiospermae	Ericaceae	Endophyte	Dothideomycetes (N/A)	Fungi	1	Ascomycota	1	Dothideomycetes	1	NA	NA	NA	NA	NA	NA	NA	SH216152.06FU	1
JQ761765	NC1120	ARIZ:NC1120	290	900	NCH	C3	Kalmia latifolia	Angiospermae	Ericaceae	Endophyte	Dothideomycetes (N/A)	Fungi	1	Ascomycota	1	Dothideomycetes	1	NA	NA	NA	NA	NA	NA	NA	SH198135.06FU	1
JQ761768	NC1123	ARIZ:NC1123	182	803	NCH	C3	Tsuga canadensis	Pinophyta	Pinaceae	Endophyte	Sordariomycetes (Xylariales)	Fungi	1	Ascomycota	1	Sordariomycetes	1	Xylariales	1	Xylariaceae	1	Nodulisporium	1	Nodulisporium sp 17 NK 2011	SH216527.06FU	1
JQ761781	NC1137	ARIZ:NC1137	265	791	NCH	C3	Kalmia latifolia	Angiospermae	Ericaceae	Endophyte	Dothideomycetes (N/A)	Fungi	1	Ascomycota	1	Dothideomycetes	1	NA	NA	NA	NA	NA	NA	NA	SH216152.06FU	1
JQ761791	NC1147	ARIZ:NC1147	107	477	NCH	C3	Tsuga canadensis	Pinophyta	Pinaceae	Endophyte	Sordariomycetes (N/A)	Fungi	1	Ascomycota	1	Sordariomycetes	1	Xylariales	1	Xylariaceae	1	Xylaria	1	Xylaria sp	SH197605.06FU	1
JQ761796	NC1152	ARIZ:NC1152	107	477	NCH	C3	Tsuga canadensis	Pinophyta	Pinaceae	Endophyte	Sordariomycetes (N/A)	Fungi	1	Ascomycota	1	Sordariomycetes	1	Xylariales	1	Xylariaceae	1	Xylaria	1	Xylaria sp	SH197605.06FU	1
JQ761800	NC1156	ARIZ:NC1156	107	715	NCH	C3	Tsuga canadensis	Pinophyta	Pinaceae	Endophyte	Sordariomycetes (N/A)	Fungi	1	Ascomycota	1	Sordariomycetes	1	Xylariales	1	Xylariaceae	1	Xylaria	1	Xylaria sp	SH197605.06FU	1
JQ761806	NC1162	ARIZ:NC1162	265	791	NCH	C3	Kalmia latifolia	Angiospermae	Ericaceae	Endophyte	Dothideomycetes (N/A)	Fungi	1	Ascomycota	1	Dothideomycetes	1	NA	NA	NA	NA	NA	NA	NA	SH216152.06FU	1
JQ761807	NC1163	ARIZ:NC1163	161	804	NCH	C3	Tsuga canadensis	Pinophyta	Pinaceae	Endophyte	Sordariomycetes (Xylariales)	Fungi	1	Ascomycota	1	Sordariomycetes	1	Xylariales	1	Xylariaceae	1	Xylaria	1	Xylaria sp	SH193310.06FU	1
JQ761818	NC1176	ARIZ:NC1176	107	715	NCH	C3	Tsuga canadensis	Pinophyta	Pinaceae	Endophyte	Sordariomycetes (N/A)	Fungi	1	Ascomycota	1	Sordariomycetes	1	Xylariales	1	Xylariaceae	1	Xylaria	1	Xylaria sp	SH197605.06FU	1
JQ761819	NC1177	ARIZ:NC1177	265	932	NCH	C3	Kalmia latifolia	Angiospermae	Ericaceae	Endophyte	Dothideomycetes (N/A)	Fungi	1	Ascomycota	1	Dothideomycetes	1	NA	NA	NA	NA	NA	NA	NA	SH216152.06FU	1
JQ761832	NC1191	ARIZ:NC1191	107	715	NCH	C3	Tsuga canadensis	Pinophyta	Pinaceae	Endophyte	Sordariomycetes (N/A)	Fungi	1	Ascomycota	1	Sordariomycetes	1	Xylariales	1	Xylariaceae	1	Xylaria	1	Xylaria sp	SH197605.06FU	1
JQ761835	NC1194	ARIZ:NC1194	107	715	NCH	C3	Tsuga canadensis	Pinophyta	Pinaceae	Endophyte	Sordariomycetes (N/A)	Fungi	1	Ascomycota	1	Sordariomycetes	1	Xylariales	1	Xylariaceae	1	Xylaria	1	Xylaria sp	SH197605.06FU	1
JQ761838	NC1197	ARIZ:NC1197	107	477	NCH	C3	Tsuga canadensis	Pinophyta	Pinaceae	Endophyte	Sordariomycetes (N/A)	Fungi	1	Ascomycota	1	Sordariomycetes	1	Xylariales	1	Xylariaceae	1	Xylaria	1	Xylaria sp	SH197605.06FU	1
JQ761849	NC1209	ARIZ:NC1209	107	715	NCH	C3	Tsuga canadensis	Pinophyta	Pinaceae	Endophyte	Sordariomycetes (N/A)	Fungi	1	Ascomycota	1	Sordariomycetes	1	Xylariales	1	Xylariaceae	1	Xylaria	1	Xylaria sp	SH197605.06FU	1
JQ761860	NC1221	ARIZ:NC1221	140	488	NCH	C3	Tsuga canadensis	Pinophyta	Pinaceae	Endophyte	Sordariomycetes (Xylariales)	Fungi	1	Ascomycota	1	Sordariomycetes	1	Xylariales	1	Xylariaceae	1	Xylaria	1	Xylaria sp	SH223881.06FU	1
JQ761861	NC1223	ARIZ:NC1223	161	827	NCH	C3	Tsuga canadensis	Pinophyta	Pinaceae	Endophyte	Sordariomycetes (Xylariales)	Fungi	1	Ascomycota	1	Sordariomycetes	1	Xylariales	1	Xylariaceae	1	Xylaria	1	Xylaria sp	SH193310.06FU	1
JQ761868	NC1231	ARIZ:NC1231	107	715	NCH	C3	Tsuga canadensis	Pinophyta	Pinaceae	Endophyte	Sordariomycetes (N/A)	Fungi	1	Ascomycota	1	Sordariomycetes	1	Xylariales	1	Xylariaceae	1	Xylaria	1	Xylaria sp	SH197605.06FU	1
KX908381	NC1242	ARIZ:NC1242	149	936	NCH	C1	Pinus strobus	Pinophyta	Pinaceae	DLF	Dothideomycetes (Botryosphaeriales)	Fungi	1	Ascomycota	1	Dothideomycetes	1	Botryosphaeriales	1	Botryosphaeriaceae	0.99	Septorioides	1	NA	NA	NA
KX908227	NC1244	ARIZ:NC1244	296	937	NCH	C1	Kalmia latifolia	Angiospermae	Ericaceae	DLF	Dothideomycetes (N/A)	Fungi	1	Ascomycota	0.91	Dothideomycetes	0.91	NA	NA	NA	NA	NA	NA	NA	NA	NA
KX908502	NC1245	ARIZ:NC1245	129	938	NCH	C1	Tsuga canadensis	Pinophyta	Pinaceae	DLF	Sordariomycetes (Hypocreales)	Fungi	1	Ascomycota	1	Sordariomycetes	1	Hypocreales	1	Nectriaceae	1	Fusarium	1	Fusarium sp OTU 011	SH217368.06FU	1
KX908477	NC1248	ARIZ:NC1248	48	893	NCH	C1	Quercus montana	Angiospermae	Fagaceae	DLF	Sordariomycetes (Diaporthales)	Fungi	1	Ascomycota	1	Sordariomycetes	1	Diaporthales	1	Valsaceae	1	NA	NA	NA	NA	NA
KX908478	NC1249	ARIZ:NC1249	248	745	NCH	C1	Quercus montana	Angiospermae	Fagaceae	DLF	Dothideomycetes (N/A)	Fungi	1	Ascomycota	1	Dothideomycetes	1	NA	NA	NA	NA	NA	NA	NA	NA	NA
KX908479	NC1250	ARIZ:NC1250	48	893	NCH	C1	Quercus montana	Angiospermae	Fagaceae	DLF	Sordariomycetes (Diaporthales)	Fungi	1	Ascomycota	1	Sordariomycetes	1	Diaporthales	1	Valsaceae	1	NA	NA	NA	SH211820.06FU	0.82
KX908228	NC1251	ARIZ:NC1251	265	939	NCH	C1	Kalmia latifolia	Angiospermae	Ericaceae	DLF	Dothideomycetes (N/A)	Fungi	1	Ascomycota	1	Dothideomycetes	1	NA	NA	NA	NA	NA	NA	NA	SH216152.06FU	1
KX908480	NC1252	ARIZ:NC1252	288	888	NCH	C1	Quercus montana	Angiospermae	Fagaceae	DLF	Sordariomycetes (Diaporthales)	Fungi	1	Ascomycota	1	Sordariomycetes	1	Diaporthales	1	NA	NA	NA	NA	NA	SH210877.06FU	1
KU683990	NC1253	ARIZ:NC1253	201	940	NCH	C1	Tsuga canadensis	Pinophyta	Pinaceae	DLF	Sordariomycetes (Xylariales)	Fungi	1	Ascomycota	1	Sordariomycetes	1	Xylariales	1	Xylariaceae	1	Nodulisporium	1	Nodulisporium sp	SH225514.06FU	1
KX908229	NC1254	ARIZ:NC1254	265	883	NCH	C1	Kalmia latifolia	Angiospermae	Ericaceae	DLF	Dothideomycetes (N/A)	Fungi	1	Ascomycota	1	Dothideomycetes	1	NA	NA	NA	NA	NA	NA	NA	SH216152.06FU	1
KU683991	NC1257	ARIZ:NC1257	162	597	NCH	C1	Tsuga canadensis	Pinophyta	Pinaceae	DLF	Sordariomycetes (Xylariales)	Fungi	1	Ascomycota	1	Sordariomycetes	1	Xylariales	1	Xylariaceae	1	Xylaria	1	Xylaria sp	SH240406.06FU	1
KX908230	NC1258	ARIZ:NC1258	265	791	NCH	C1	Kalmia latifolia	Angiospermae	Ericaceae	DLF	Dothideomycetes (N/A)	Fungi	1	Ascomycota	1	Dothideomycetes	1	NA	NA	NA	NA	NA	NA	NA	SH216152.06FU	1
KX908382	NC1259	ARIZ:NC1259	149	936	NCH	C1	Pinus strobus	Pinophyta	Pinaceae	DLF	Dothideomycetes (Botryosphaeriales)	Fungi	1	Ascomycota	1	Dothideomycetes	1	Botryosphaeriales	1	Botryosphaeriaceae	0.98	Septorioides	1	NA	NA	NA
KX908503	NC1260	ARIZ:NC1260	238	941	NCH	C1	Tsuga canadensis	Pinophyta	Pinaceae	DLF	N/A	Fungi	1	Ascomycota	1	Sordariomycetes	1	Hypocreales	1	Nectriaceae	1	Fusarium	0.82	NA	NA	NA
KX908481	NC1261	ARIZ:NC1261	48	893	NCH	C1	Quercus montana	Angiospermae	Fagaceae	DLF	Sordariomycetes (Diaporthales)	Fungi	1	Ascomycota	1	Sordariomycetes	1	Diaporthales	1	Valsaceae	1	NA	NA	NA	NA	NA
KX908504	NC1262	ARIZ:NC1262	129	938	NCH	C1	Tsuga canadensis	Pinophyta	Pinaceae	DLF	Sordariomycetes (Hypocreales)	Fungi	1	Ascomycota	1	Sordariomycetes	1	Hypocreales	1	Nectriaceae	1	Fusarium	1	Fusarium sp OTU 011	SH217368.06FU	1
KX908482	NC1263	ARIZ:NC1263	48	893	NCH	C1	Quercus montana	Angiospermae	Fagaceae	DLF	Sordariomycetes (Diaporthales)	Fungi	1	Ascomycota	1	Sordariomycetes	1	Diaporthales	1	Valsaceae	1	NA	NA	NA	NA	NA
KX908483	NC1265	ARIZ:NC1265	15	942	NCH	C1	Quercus montana	Angiospermae	Fagaceae	DLF	Dothideomycetes (Dothideales)	Fungi	1	Ascomycota	1	Dothideomycetes	1	Dothideales	1	Dothioraceae	1	Kabatiella	0.87	Kabatiella bupleuri	SH229248.06FU	0.87
KX908484	NC1267	ARIZ:NC1267	48	893	NCH	C1	Quercus montana	Angiospermae	Fagaceae	DLF	Sordariomycetes (Diaporthales)	Fungi	1	Ascomycota	1	Sordariomycetes	1	Diaporthales	1	Valsaceae	1	NA	NA	NA	NA	NA
KX908505	NC1268	ARIZ:NC1268	44	811	NCH	C1	Tsuga canadensis	Pinophyta	Pinaceae	DLF	Sordariomycetes (Boliniales)	Fungi	1	Ascomycota	1	Sordariomycetes	1	Boliniales	1	Boliniaceae	1	Pseudovalsaria	1	Pseudovalsaria ferruginea	SH227626.06FU	1
KU683992	NC1269	ARIZ:NC1269	88	787	NCH	C1	Quercus montana	Angiospermae	Fagaceae	DLF	Sordariomycetes (N/A)	Fungi	1	Ascomycota	1	Sordariomycetes	1	NA	NA	NA	NA	NA	NA	NA	SH205984.06FU	1
KX908231	NC1271	ARIZ:NC1271	265	943	NCH	C1	Kalmia latifolia	Angiospermae	Ericaceae	DLF	Dothideomycetes (N/A)	Fungi	1	Ascomycota	1	Dothideomycetes	1	NA	NA	NA	NA	NA	NA	NA	SH216152.06FU	1
KX908485	NC1272	ARIZ:NC1272	48	893	NCH	C1	Quercus montana	Angiospermae	Fagaceae	DLF	Sordariomycetes (Diaporthales)	Fungi	1	Ascomycota	1	Sordariomycetes	1	Diaporthales	1	Valsaceae	1	NA	NA	NA	NA	NA
KX908232	NC1273	ARIZ:NC1273	286	886	NCH	C1	Kalmia latifolia	Angiospermae	Ericaceae	DLF	Dothideomycetes (Capnodiales)	Fungi	1	Ascomycota	0.97	Dothideomycetes	0.97	Capnodiales	0.96	NA	NA	NA	NA	NA	NA	NA
KX908506	NC1274	ARIZ:NC1274	295	921	NCH	C1	Tsuga canadensis	Pinophyta	Pinaceae	DLF	Leotiomycetes (Helotiales)	Fungi	1	Ascomycota	1	Leotiomycetes	1	Helotiales	1	Vibrisseaceae	1	Acephala	0.97	Acephala sp	SH234174.06FU	0.97
KX908507	NC1276	ARIZ:NC1276	80	218	NCH	C1	Tsuga canadensis	Pinophyta	Pinaceae	DLF	Dothideomycetes (N/A)	Fungi	1	Ascomycota	1	Dothideomycetes	1	Pleosporales	1	Venturiaceae 1	1	Rhizosphaera	1	Rhizosphaera oudemansii	SH231449.06FU	1
KX908486	NC1277	ARIZ:NC1277	158	776	NCH	C1	Quercus montana	Angiospermae	Fagaceae	DLF	Sordariomycetes (Diaporthales)	Fungi	1	Ascomycota	1	Sordariomycetes	1	Diaporthales	1	Incertae sedis 20	1	Tubakia	1	Tubakia seoraksanensis	SH224249.06FU	1
KX908233	NC1278	ARIZ:NC1278	265	944	NCH	C1	Kalmia latifolia	Angiospermae	Ericaceae	DLF	Dothideomycetes (N/A)	Fungi	1	Ascomycota	1	Dothideomycetes	1	NA	NA	NA	NA	NA	NA	NA	SH216152.06FU	1
KX908234	NC1279	ARIZ:NC1279	265	791	NCH	C1	Kalmia latifolia	Angiospermae	Ericaceae	DLF	Dothideomycetes (N/A)	Fungi	1	Ascomycota	1	Dothideomycetes	1	NA	NA	NA	NA	NA	NA	NA	SH216152.06FU	1
KU683993	NC1281	ARIZ:NC1281	107	290	NCH	C1	Tsuga canadensis	Pinophyta	Pinaceae	DLF	Sordariomycetes (N/A)	Fungi	1	Ascomycota	1	Sordariomycetes	1	Xylariales	1	Xylariaceae	1	Xylaria	1	Xylaria sp	SH197605.06FU	1
KX908508	NC1282	ARIZ:NC1282	80	218	NCH	C1	Tsuga canadensis	Pinophyta	Pinaceae	DLF	Dothideomycetes (N/A)	Fungi	1	Ascomycota	1	Dothideomycetes	1	Pleosporales	1	Venturiaceae 1	1	Rhizosphaera	1	Rhizosphaera oudemansii	SH231449.06FU	1
KX908487	NC1283	ARIZ:NC1283	48	893	NCH	C1	Quercus montana	Angiospermae	Fagaceae	DLF	Sordariomycetes (Diaporthales)	Fungi	1	Ascomycota	1	Sordariomycetes	1	Diaporthales	1	Valsaceae	1	NA	NA	NA	NA	NA
KU683994	NC1284	ARIZ:NC1284	88	787	NCH	C1	Quercus montana	Angiospermae	Fagaceae	DLF	Sordariomycetes (N/A)	Fungi	1	Ascomycota	1	Sordariomycetes	1	NA	NA	NA	NA	NA	NA	NA	SH205984.06FU	1
KX908509	NC1285	ARIZ:NC1285	44	811	NCH	C1	Tsuga canadensis	Pinophyta	Pinaceae	DLF	Sordariomycetes (Boliniales)	Fungi	1	Ascomycota	1	Sordariomycetes	1	Boliniales	1	Boliniaceae	1	Pseudovalsaria	1	Pseudovalsaria ferruginea	SH227626.06FU	1
KX908383	NC1286	ARIZ:NC1286	149	936	NCH	C1	Pinus strobus	Pinophyta	Pinaceae	DLF	Dothideomycetes (Botryosphaeriales)	Fungi	1	Ascomycota	1	Dothideomycetes	1	Botryosphaeriales	1	Botryosphaeriaceae	0.99	Septorioides	1	NA	NA	NA
KX908384	NC1287	ARIZ:NC1287	149	936	NCH	C1	Pinus strobus	Pinophyta	Pinaceae	DLF	Dothideomycetes (Botryosphaeriales)	Fungi	1	Ascomycota	1	Dothideomycetes	1	Botryosphaeriales	1	Botryosphaeriaceae	0.98	Septorioides	1	NA	NA	NA
KX908488	NC1288	ARIZ:NC1288	48	893	NCH	C1	Quercus montana	Angiospermae	Fagaceae	DLF	Sordariomycetes (Diaporthales)	Fungi	1	Ascomycota	1	Sordariomycetes	1	Diaporthales	1	Valsaceae	1	NA	NA	NA	NA	NA
KX908510	NC1289	ARIZ:NC1289	129	938	NCH	C1	Tsuga canadensis	Pinophyta	Pinaceae	DLF	Sordariomycetes (Hypocreales)	Fungi	1	Ascomycota	1	Sordariomycetes	1	Hypocreales	1	Nectriaceae	1	Fusarium	1	Fusarium sp OTU 011	SH217368.06FU	1
KX908235	NC1290	ARIZ:NC1290	289	896	NCH	C1	Kalmia latifolia	Angiospermae	Ericaceae	DLF	Dothideomycetes (N/A)	Fungi	1	Ascomycota	1	Dothideomycetes	0.92	Capnodiales	0.84	NA	NA	NA	NA	NA	NA	NA
KX908375	NC1291	ARIZ:NC1291	59	885	NCH	C1	Tsuga canadensis	Pinophyta	Pinaceae	DLF	Dothideomycetes (Dothideales)	Fungi	1	Ascomycota	1	Dothideomycetes	1	Dothideales	0.83	NA	NA	NA	NA	NA	NA	NA
KX908236	NC1292	ARIZ:NC1292	265	932	NCH	C1	Kalmia latifolia	Angiospermae	Ericaceae	DLF	Dothideomycetes (N/A)	Fungi	1	Ascomycota	1	Dothideomycetes	1	NA	NA	NA	NA	NA	NA	NA	SH216152.06FU	1
KX908237	NC1293	ARIZ:NC1293	265	791	NCH	C1	Kalmia latifolia	Angiospermae	Ericaceae	DLF	Dothideomycetes (N/A)	Fungi	1	Ascomycota	1	Dothideomycetes	1	NA	NA	NA	NA	NA	NA	NA	SH216152.06FU	1
KU683995	NC1295	ARIZ:NC1295	88	787	NCH	C1	Quercus montana	Angiospermae	Fagaceae	DLF	Sordariomycetes (N/A)	Fungi	1	Ascomycota	1	Sordariomycetes	1	NA	NA	NA	NA	NA	NA	NA	SH205984.06FU	1
KX908511	NC1296	ARIZ:NC1296	129	938	NCH	C1	Tsuga canadensis	Pinophyta	Pinaceae	DLF	Sordariomycetes (Hypocreales)	Fungi	1	Ascomycota	1	Sordariomycetes	1	Hypocreales	1	Nectriaceae	1	Fusarium	1	Fusarium sp OTU 011	SH217368.06FU	1
KX908385	NC1298	ARIZ:NC1298	149	936	NCH	C1	Pinus strobus	Pinophyta	Pinaceae	DLF	Dothideomycetes (Botryosphaeriales)	Fungi	1	Ascomycota	1	Dothideomycetes	1	Botryosphaeriales	1	Botryosphaeriaceae	0.99	Septorioides	1	NA	NA	NA
KX908238	NC1300	ARIZ:NC1300	265	791	NCH	C1	Kalmia latifolia	Angiospermae	Ericaceae	DLF	Dothideomycetes (N/A)	Fungi	1	Ascomycota	1	Dothideomycetes	1	NA	NA	NA	NA	NA	NA	NA	SH216152.06FU	1
KX908512	NC1301	ARIZ:NC1301	129	938	NCH	C1	Tsuga canadensis	Pinophyta	Pinaceae	DLF	Sordariomycetes (Hypocreales)	Fungi	1	Ascomycota	1	Sordariomycetes	1	Hypocreales	1	Nectriaceae	1	Fusarium	1	Fusarium sp OTU 011	SH217368.06FU	1
KX908220	NC1302	ARIZ:NC1302	265	943	NCH	C1	Kalmia latifolia	Angiospermae	Ericaceae	DLF	Dothideomycetes (N/A)	Fungi	1	Ascomycota	1	Dothideomycetes	1	NA	NA	NA	NA	NA	NA	NA	SH216152.06FU	1
KX908239	NC1303	ARIZ:NC1303	80	218	NCH	C1	Kalmia latifolia	Angiospermae	Ericaceae	DLF	Dothideomycetes (N/A)	Fungi	1	Ascomycota	1	Dothideomycetes	1	Pleosporales	1	Venturiaceae 1	1	Rhizosphaera	1	Rhizosphaera oudemansii	SH231449.06FU	1
KX908240	NC1304	ARIZ:NC1304	289	896	NCH	C1	Kalmia latifolia	Angiospermae	Ericaceae	DLF	Dothideomycetes (Capnodiales)	Fungi	1	Ascomycota	1	Dothideomycetes	0.98	Capnodiales	0.92	NA	NA	NA	NA	NA	NA	NA
KU683996	NC1305	ARIZ:NC1305	88	945	NCH	C1	Quercus montana	Angiospermae	Fagaceae	DLF	Sordariomycetes (N/A)	Fungi	1	Ascomycota	1	Sordariomycetes	0.94	NA	NA	NA	NA	NA	NA	NA	SH205984.06FU	0.93
KX908241	NC1306	ARIZ:NC1306	265	791	NCH	C1	Kalmia latifolia	Angiospermae	Ericaceae	DLF	Dothideomycetes (N/A)	Fungi	1	Ascomycota	1	Dothideomycetes	1	NA	NA	NA	NA	NA	NA	NA	SH216152.06FU	1
KX908376	NC1307	ARIZ:NC1307	282	876	NCH	C1	Kalmia latifolia	Angiospermae	Ericaceae	DLF	Dothideomycetes (N/A)	Fungi	1	Ascomycota	1	Dothideomycetes	1	NA	NA	NA	NA	NA	NA	NA	NA	NA
KX908386	NC1308	ARIZ:NC1308	149	936	NCH	C1	Pinus strobus	Pinophyta	Pinaceae	DLF	Dothideomycetes (Botryosphaeriales)	Fungi	1	Ascomycota	1	Dothideomycetes	1	Botryosphaeriales	1	Botryosphaeriaceae	0.98	Septorioides	1	NA	NA	NA
KX908489	NC1309	ARIZ:NC1309	222	889	NCH	C1	Quercus montana	Angiospermae	Fagaceae	DLF	Sordariomycetes (Xylariales)	Fungi	1	Ascomycota	1	Sordariomycetes	1	Xylariales	1	Amphisphaeriaceae	1	Pestalotiopsis	0.99	Pestalotiopsis microspora	SH210434.06FU	0.93
KX908513	NC1310	ARIZ:NC1310	129	938	NCH	C1	Tsuga canadensis	Pinophyta	Pinaceae	DLF	Sordariomycetes (Hypocreales)	Fungi	1	Ascomycota	1	Sordariomycetes	1	Hypocreales	1	Nectriaceae	1	Fusarium	1	Fusarium sp OTU 011	SH217368.06FU	1
KX908242	NC1312	ARIZ:NC1312	265	883	NCH	C1	Kalmia latifolia	Angiospermae	Ericaceae	DLF	Dothideomycetes (N/A)	Fungi	1	Ascomycota	1	Dothideomycetes	1	NA	NA	NA	NA	NA	NA	NA	SH216152.06FU	1
KX908243	NC1314	ARIZ:NC1314	289	896	NCH	C1	Kalmia latifolia	Angiospermae	Ericaceae	DLF	Dothideomycetes (N/A)	Fungi	1	Ascomycota	1	Dothideomycetes	0.92	Capnodiales	0.84	NA	NA	NA	NA	NA	NA	NA
KX908490	NC1315	ARIZ:NC1315	48	893	NCH	C1	Quercus montana	Angiospermae	Fagaceae	DLF	Sordariomycetes (Diaporthales)	Fungi	1	Ascomycota	1	Sordariomycetes	1	Diaporthales	1	Valsaceae	1	NA	NA	NA	NA	NA
KX908244	NC1316	ARIZ:NC1316	265	791	NCH	C1	Kalmia latifolia	Angiospermae	Ericaceae	DLF	Dothideomycetes (N/A)	Fungi	1	Ascomycota	1	Dothideomycetes	1	NA	NA	NA	NA	NA	NA	NA	SH216152.06FU	1
KX908221	NC1317	ARIZ:NC1317	265	791	NCH	C1	Kalmia latifolia	Angiospermae	Ericaceae	DLF	Dothideomycetes (N/A)	Fungi	1	Ascomycota	1	Dothideomycetes	1	NA	NA	NA	NA	NA	NA	NA	SH216152.06FU	1
KX908491	NC1318	ARIZ:NC1318	158	773	NCH	C1	Quercus montana	Angiospermae	Fagaceae	DLF	Sordariomycetes (Diaporthales)	Fungi	1	Ascomycota	1	Sordariomycetes	1	Diaporthales	1	Incertae sedis 20	1	Tubakia	1	Tubakia seoraksanensis	SH224249.06FU	1
KX908245	NC1319	ARIZ:NC1319	265	791	NCH	C1	Kalmia latifolia	Angiospermae	Ericaceae	DLF	Dothideomycetes (N/A)	Fungi	1	Ascomycota	1	Dothideomycetes	1	NA	NA	NA	NA	NA	NA	NA	SH216152.06FU	1
KX908514	NC1320	ARIZ:NC1320	238	941	NCH	C1	Tsuga canadensis	Pinophyta	Pinaceae	DLF	N/A	Fungi	1	Ascomycota	1	Sordariomycetes	1	Hypocreales	1	Nectriaceae	1	Fusarium	0.82	NA	NA	NA
KP202976	NC1321	ARIZ:NC1321	16	175	NCH	C1	Tsuga canadensis	Pinophyta	Pinaceae	DLF	Eurotiomycetes (Eurotiales)	Fungi	1	Ascomycota	1	Eurotiomycetes	1	Eurotiales	1	Trichocomaceae	1	Penicillium	0.87	Penicillium vulpinum	SH231346.06FU	0.85
KX908246	NC1322	ARIZ:NC1322	265	791	NCH	C1	Kalmia latifolia	Angiospermae	Ericaceae	DLF	Dothideomycetes (N/A)	Fungi	1	Ascomycota	1	Dothideomycetes	1	NA	NA	NA	NA	NA	NA	NA	SH216152.06FU	1
KX908247	NC1323	ARIZ:NC1323	265	944	NCH	C1	Kalmia latifolia	Angiospermae	Ericaceae	DLF	Dothideomycetes (N/A)	Fungi	1	Ascomycota	1	Dothideomycetes	1	NA	NA	NA	NA	NA	NA	NA	SH216152.06FU	1
KX908515	NC1324	ARIZ:NC1324	80	218	NCH	C1	Tsuga canadensis	Pinophyta	Pinaceae	DLF	Dothideomycetes (N/A)	Fungi	1	Ascomycota	1	Dothideomycetes	1	Pleosporales	1	Venturiaceae 1	1	Rhizosphaera	1	Rhizosphaera oudemansii	SH231449.06FU	1
KX908387	NC1325	ARIZ:NC1325	149	936	NCH	C1	Pinus strobus	Pinophyta	Pinaceae	DLF	Dothideomycetes (Botryosphaeriales)	Fungi	1	Ascomycota	1	Dothideomycetes	1	Botryosphaeriales	1	Botryosphaeriaceae	0.98	Septorioides	1	NA	NA	NA
KX908248	NC1326	ARIZ:NC1326	265	883	NCH	C1	Kalmia latifolia	Angiospermae	Ericaceae	DLF	Dothideomycetes (N/A)	Fungi	1	Ascomycota	1	Dothideomycetes	1	NA	NA	NA	NA	NA	NA	NA	SH216152.06FU	1
KX908516	NC1327	ARIZ:NC1327	80	218	NCH	C1	Tsuga canadensis	Pinophyta	Pinaceae	DLF	Dothideomycetes (N/A)	Fungi	1	Ascomycota	1	Dothideomycetes	1	Pleosporales	1	Venturiaceae 1	1	Rhizosphaera	1	Rhizosphaera oudemansii	SH231449.06FU	1
KX908377	NC1329	ARIZ:NC1329	149	936	NCH	C1	Pinus strobus	Pinophyta	Pinaceae	DLF	Dothideomycetes (Botryosphaeriales)	Fungi	1	Ascomycota	1	Dothideomycetes	1	Botryosphaeriales	1	Botryosphaeriaceae	1	Saccharata	0.97	Saccharata capensis	SH198332.06FU	0.97
KU683997	NC1330	ARIZ:NC1330	88	946	NCH	C1	Quercus montana	Angiospermae	Fagaceae	DLF	Sordariomycetes (N/A)	Fungi	1	Ascomycota	1	Sordariomycetes	0.98	NA	NA	NA	NA	NA	NA	NA	SH205984.06FU	0.98
KU683998	NC1332	ARIZ:NC1332	107	477	NCH	C1	Kalmia latifolia	Angiospermae	Ericaceae	DLF	Sordariomycetes (N/A)	Fungi	1	Ascomycota	1	Sordariomycetes	1	Xylariales	1	Xylariaceae	1	Xylaria	1	Xylaria sp	SH197605.06FU	1
KU683999	NC1333	ARIZ:NC1333	262	782	NCH	C1	Tsuga canadensis	Pinophyta	Pinaceae	DLF	Sordariomycetes (Xylariales)	Fungi	1	Ascomycota	1	Sordariomycetes	1	Xylariales	1	Xylariaceae	0.99	NA	NA	NA	SH193307.06FU	0.99
KX908222	NC1334	ARIZ:NC1334	269	947	NCH	C1	Tsuga canadensis	Pinophyta	Pinaceae	DLF	N/A	Fungi	1	Fungi unidentified	0.99	NA	NA	NA	NA	NA	NA	NA	NA	NA	SH234387.06FU	0.99
KX908223	NC1335	ARIZ:NC1335	80	218	NCH	C1	Tsuga canadensis	Pinophyta	Pinaceae	DLF	Dothideomycetes (Pleosporales)	Fungi	1	Ascomycota	1	Dothideomycetes	1	Pleosporales	1	Venturiaceae 1	1	Rhizosphaera	1	Rhizosphaera oudemansii	SH231449.06FU	1
KX908249	NC1336	ARIZ:NC1336	265	899	NCH	C1	Kalmia latifolia	Angiospermae	Ericaceae	DLF	Dothideomycetes (N/A)	Fungi	1	Ascomycota	1	Dothideomycetes	1	NA	NA	NA	NA	NA	NA	NA	SH216152.06FU	1
KX908250	NC1337	ARIZ:NC1337	289	896	NCH	C1	Kalmia latifolia	Angiospermae	Ericaceae	DLF	Dothideomycetes (N/A)	Fungi	1	Ascomycota	1	Dothideomycetes	0.92	Capnodiales	0.84	NA	NA	NA	NA	NA	NA	NA
KX908224	NC1338	ARIZ:NC1338	80	218	NCH	C1	Tsuga canadensis	Pinophyta	Pinaceae	DLF	Dothideomycetes (Pleosporales)	Fungi	1	Ascomycota	1	Dothideomycetes	1	Pleosporales	1	Venturiaceae 1	1	Rhizosphaera	1	Rhizosphaera oudemansii	SH231449.06FU	1
KX908251	NC1340	ARIZ:NC1340	265	791	NCH	C1	Kalmia latifolia	Angiospermae	Ericaceae	DLF	Dothideomycetes (N/A)	Fungi	1	Ascomycota	1	Dothideomycetes	1	NA	NA	NA	NA	NA	NA	NA	SH216152.06FU	1
KX908492	NC1341	ARIZ:NC1341	48	893	NCH	C1	Quercus montana	Angiospermae	Fagaceae	DLF	Sordariomycetes (Diaporthales)	Fungi	1	Ascomycota	1	Sordariomycetes	1	Diaporthales	1	Valsaceae	1	NA	NA	NA	NA	NA
KX908517	NC1342	ARIZ:NC1342	129	938	NCH	C1	Tsuga canadensis	Pinophyta	Pinaceae	DLF	Sordariomycetes (Hypocreales)	Fungi	1	Ascomycota	1	Sordariomycetes	1	Hypocreales	1	Nectriaceae	1	Fusarium	1	Fusarium sp OTU 011	SH217368.06FU	1
KX908388	NC1343	ARIZ:NC1343	149	936	NCH	C1	Pinus strobus	Pinophyta	Pinaceae	DLF	Dothideomycetes (Botryosphaeriales)	Fungi	1	Ascomycota	1	Dothideomycetes	1	Botryosphaeriales	1	Botryosphaeriaceae	0.99	Septorioides	1	NA	NA	NA
KU684000	NC1344	ARIZ:NC1344	88	787	NCH	C1	Quercus montana	Angiospermae	Fagaceae	DLF	Sordariomycetes (N/A)	Fungi	1	Ascomycota	1	Sordariomycetes	1	NA	NA	NA	NA	NA	NA	NA	SH205984.06FU	1
KX908252	NC1345	ARIZ:NC1345	265	791	NCH	C1	Kalmia latifolia	Angiospermae	Ericaceae	DLF	Dothideomycetes (N/A)	Fungi	1	Ascomycota	1	Dothideomycetes	1	NA	NA	NA	NA	NA	NA	NA	SH216152.06FU	1
KX908518	NC1346	ARIZ:NC1346	29	46	NCH	C1	Tsuga canadensis	Pinophyta	Pinaceae	DLF	Dothideomycetes (Pleosporales)	Fungi	1	Ascomycota	1	Dothideomycetes	1	Pleosporales	1	Pleosporaceae	1	Alternaria	1	Alternaria sp 3 MU 2012	SH224849.06FU	0.89
KX908253	NC1347	ARIZ:NC1347	265	895	NCH	C1	Kalmia latifolia	Angiospermae	Ericaceae	DLF	Dothideomycetes (N/A)	Fungi	1	Ascomycota	1	Dothideomycetes	1	NA	NA	NA	NA	NA	NA	NA	SH216152.06FU	1
KX908493	NC1348	ARIZ:NC1348	48	893	NCH	C1	Quercus montana	Angiospermae	Fagaceae	DLF	Sordariomycetes (Diaporthales)	Fungi	1	Ascomycota	1	Sordariomycetes	1	Diaporthales	1	Valsaceae	1	NA	NA	NA	NA	NA
KU684001	NC1349	ARIZ:NC1349	262	782	NCH	C1	Tsuga canadensis	Pinophyta	Pinaceae	DLF	Sordariomycetes (Xylariales)	Fungi	1	Ascomycota	1	Sordariomycetes	1	Xylariales	1	Xylariaceae	1	NA	NA	NA	SH193307.06FU	0.99
KX908389	NC1350	ARIZ:NC1350	41	67	NCH	C1	Pinus strobus	Pinophyta	Pinaceae	DLF	Dothideomycetes (Dothideales)	Fungi	1	Ascomycota	1	Dothideomycetes	1	Dothideales	0.98	Dothioraceae	0.97	NA	NA	NA	SH231446.06FU	0.97
[truncated: 156 more rows]
